# Supplementary material for: Non-biogroup 1 or 2 Strains of the Emerging Zoonotic Pathogen Escherichia albertii, Their Proposed Assignment to Biogroup 3, and Their Commonly Detected Characteristics
Source: Front Microbiol. 2019 Jul 5;10:1543. doi: 10.3389/fmicb.2019.01543 (PMC6624678; doi:10.3389/fmicb.2019.01543)
Supplement: Supplementary file 1 [file Table_1.xlsx]

## Sheet: Table S1
				Table S1. Origins of Escherichia albertii isolates
				Origin 1	Initial isolates					Selected isolates with unique pulsed-field gel electrophoresis (PFGE) profiles. The isolates were examined by further biochemical and molecular testing					Reference
					Origin 2		Description	No. of isolates tested by PFGE		No. of selected isolates	Sampling period	Sampling place (Pr.a) of strains tested	Description
				Human	Outbreak isolates (co-infected with norovirus)		Isolates from two diarrheal patients were co-infected with norovirus in two outbreaks	3		2	2011	Akita, Fukuoka	From two diarrheal patients		Konno et al., 2012
					Outbreak isolates		Patient isolates in five outbreaks caused by E.A.b	29		6	2003–2014	Fukuoka, Kumamoto	Patient isolates from five outbreaks caused by E.A.		8 and this study
					Sporadic case isolates		402 lactose-negative isolates from 402 diarrheal patients were tested, with three isolates eventually identified as E.A. Two isolates were re-identified as E. A.	5		5	2012 (n=3), 2000 (n=1), 1994 (n=1)	Chiba, Tokyo, Mie, Miyazaki	From five diarrheal patients		This study
				Pigeon droppings	Collected for this study		Isolates were obtained from 64 PCR-positive samples among 1,421 droppings samples collected from 42 sites across 16 prefectures in Japan.	283		71	2009–2015	Hokkaido, Tokyo, Kanagawa, Shizuoka, Aichi, Kyoto, Osaka, Fukuoka, Saga	From 60 PCR-positive samples that were collected from 22 sites		This study
				Other wild birds	Wild birds in Hokkaido Pr.		Isolates from 12 birds: black-tailed gull (n=1), brown hawk owl (n=1), Eurasian magpie (n=2), Eurasian woodcock (n=1), large-billed crow (jungle crow) (n=1), slaty-backed gull (n=3), tree sparrow (n=2)	12		11	2012	Hokkaido	From 11 birds: black-tailed gull (n=1), brown hawk owl (n=1), Eurasian magpie (n=2), Eurasian woodcock (n=1), large-billed crow (jungle crow) (n=1), slaty-backed gull (n=3), tree sparrow (n=1)		This study
					Wild birds in Kyushu		Isolates from eight deceased wild birds that had crashed into windows (seven pale thrush and one common kingfisher)	72		9	2012–2013	Fukuoka	From six pale thrush and one common kingfisher		This study
				Retail chicken liver			Isolates from 2 out of 104 retail chicken products	10		3	2014	Fukuoka	From two chicken products		Maeda et al., 2015
				Reference strains	Biogroup 1c		LMG	3		3
					Biogroup 2c		ATCC	1		1
				Total				418		111
				aPr., Prefecture. Hokkaido Prefecture is located northeast of the main island of Honshu, while Fukuoka Prefecture is located southwest of Honshu.
				bE.A., Escherichia albertii.
				cReference Manual of Clinical Microbiology.
				References: Konno T, Yatsuyanagi J, Takahashi S, Kumagai Y, Wada E, Chiba M, Saito S. 2012. Isolation and identification of Escherichia albertii from a patient in an outbreak of gastroenteritis. Jpn J Infect Dis 65, 203-7; Maeda E, Murakami K, Sera N, Ito K, Fujimoto S. 2015. Detection of Escherichia albertii from chicken meat and giblets. J Vet Med Sci 77, 871-3.
