# Supplementary material for: Non-biogroup 1 or 2 Strains of the Emerging Zoonotic Pathogen Escherichia albertii, Their Proposed Assignment to Biogroup 3, and Their Commonly Detected Characteristics
Source: Front Microbiol. 2019 Jul 5;10:1543. doi: 10.3389/fmicb.2019.01543 (PMC6624678; doi:10.3389/fmicb.2019.01543)
Supplement: Supplementary file 4 [file Table_4.xlsx]

## Sheet: Table S4
Table S4. Sequences for multilocus sequence analysis of Escherichia albertii strains tested
	adk	fumC	gyrB	icd	mdh	purA	recA
2251	GGGGAAAGGGACTCAGGCTCAGTTCATCATGGAGAAATATGGTATTCCGCAAATCTCCACAGGTGATATGCTGCGTGCCGCAGTCAAATCTGGCTCCGAGCTGGGTAAACAAGCAAAAGACATTATGGACGCTGGCAAACTGGTTACCGATGAACTGGTGATCGCACTGGTTAAAGAACGTATTGCTCAGGAAGACTGCCGTAACGGTTTCCTGCTTGACGGCTTCCCGCGTACTATTCCGCAGGCTGACGCGATGAAAGAAGCGGGCATCAATGTTGATTACGTTCTGGAGTTCGACGTACCGGACGAACTGATTGTTGATCGTATTGTTGGTCGCCGCGTTCACGCGCCATCTGGCCGTGTTTATCACGTTAAATTCAATCCGCCGAAAGTAGAAGG…	CGAGAGCCATTCGCCAGGCGGCGGATGAAGTGCTGGCAGGGCAACATGATGATGAGTTCCCGCTGGCAATCTGGCAAACGGGATCTGGTACGCAAAGCAATATGAATATGAATGAAGTACTGGCTAACCGGGCCAGCGAATTGCTTGGCGGCGTACGCGGAATGGAACGTAAAGTTCACCCTAACGATGACGTGAACAAAAGCCAAAGCTCCAATGATGTCTTCCCAACTGCTATGCACGTGGCGGCGTTATTGGCACTGCGTAAGCAACTCATTCCTCAGCTCAAAAACCTCACTCAAACTCTGAATGAGAAATCGCGCGCATTTGCCGATATCGTCAAAATTGGTCGTACCCACTTGCAGGACGCCACACCGCTGACCCTGGGACAGGAGATTTCTG…	GGTCTGCACGGCGTTGGTGTTTCGGTAGTAAACGCCCTGTCGCAAAAACTGGAGCTGGTTATTCAGCGCGAGGGTAAAATTCACCGTCAGATCTACGAACACGGTGTTCCGCAGGCACCGCTGGCGGTTACTGGTGACACCGACAAAACCGGCACCATGGTGCGTTTCTGGCCAAGCCTTGAAACTTTCACCAATGTGACCGAGTTCGAATACGATATTCTGGCGAAGCGTCTGCGTGAGCTGTCCTTCCTCAATTCCGGCGTGTCTATTCGTCTGAAAGACAAACGCGACGGCAAAGAAGACCACTTCCACTATGAAGGCGGCATTAAGGCGTTCGTTGAATATCTGAACAAGAACAAAACGCCGATTCACCCGAACATCTTCTACTTCTCCACCGAA…	CGATGCTGCCGTCGAGAAAGCCTATAAAGGTGAGCGTAAAATCTCCTGGATGGAAATTTACACCGGTGAAAAATCCACACAGGTTTATGGTCAGGACGTCTGGCTGCCTGCTGAAACCCTTGATCTGATTCGTGAATATCGCGTTGCTATCAAAGGCCCTCTGACCACTCCGGTTGGCGGCGGTATTCGTTCTCTTAACGTTGCCCTGCGTCAGGAGCTGGATCTTTACATCTGCCTGCGTCCGGTACGTTACTACCAGGGCACCCCAAGCCCGGTTAAACACCCTGAACTGACCGATATGGTTATCTTCCGTGAAAACTCGGAAGACATTTATGCGGGTATCGAATGGAAAGCTGACTCTGCCGACGCTGAGAAAGTGATCAAATTCCTGCGTGAAGA…	GGTGTAGCGCGTAAACCGGGTATGGATCGTTCCGACCTGTTTAACGTTAACGCCGGTATTGTAAAGAATCTGGTTCAGCAAGTTGCGAAAACTTGCCCGAAAGCGTGCATTGGCATTATCACTAACCCGGTTAACACCACTGTGGCTATCGCTGCGGAAGTGCTGAAAAAAGCCGGTGTTTATGACAAAAACAAGCTGTTTGGCGTTACTACGCTGGATATTATTCGTTCCAACACCTTTGTCGCGGAACTGAAAGGTAAACAACCGGGTGATGTAGAAGTGCCTGTTATTGGCGGTCACTCTGGCGTTACTATTCTGCCGCTGCTGTCACAGGTTCCTGGCGTCAGTTTTACCGAGCAGGAAGTCGCAGATCTGACCAAACGTATCCAGAACGCGGGC…	ATAACGCGCGTGAGAAAGCGCGCGGCGCGAAAGCGATCGGCACCACGGGGCGTGGTATCGGGCCTGCTTATGAAGATAAAGTGGCACGTCGCGGTCTGCGTGTTGGCGACCTTTTCGACAAAGAAACCTTCGCTGAAAAACTGAAAGAAGTGATGGAATATCACAACTTCCAGTTGGTTAACTACTACAAAGTTGAAGCGGTTGATTACCAGAAAGTTCTGGATGATGTGATGGCCGTTGCCGACATCCTGACTTCCATGGTGGTTGACGTTTCTGACCTGCTTGACCAGGCGCGTCAGCGTGGCGATTTCGTCATGTTTGAAGGTGCGCAGGGTACGCTGCTGGATATCGACCACGGTACTTATCCGTACGTAACCTCTTCCAACACCACTGCGGGCG…	TGCTCGTAAACTGGGCGTCGATATCGACAACCTGCTGTGTTCCCAGCCGGACACTGGCGAACAGGCGCTGGAAATCTGTGACGCCCTGGCGCGCTCTGGCGCAGTAGACGTTATCGTTGTTGACTCCGTAGCGGCACTGACGCCGAAAGCGGAAATCGAAGGTGAAATCGGCGACTCTCACATGGGTCTTGCGGCACGTATGATGAGCCAGGCGATGCGTAAGCTGGCGGGTAACCTGAAGCAGTCCAACACGCTGCTGATCTTCATCAACCAGATCCGTATGAAAATTGGTGTGATGTTCGGTAACCCGGAAACCACTACCGGTGGTAACGCGCTGAAATTCTACGCCTCTGTTCGTCTCGACATCCGTCGTATCGGCGCGGTGAAAGAGGGCGAAAA…
2427	GGGGAAAGGGACTCAGGCTCAGTTCATCATGGAGAAATATGGTATTCCGCAAATCTCCACAGGTGATATGCTGCGTGCCGCAGTCAAATCTGGCTCCGAGCTGGGTAAACAAGCAAAAGACATTATGGACGCTGGCAAACTGGTTACCGATGAACTGGTGATCGCGCTGGTTAAAGAACGTATTGCTCAGGAAGACTGCCGTAACGGTTTCCTGCTTGACGGCTTCCCGCGTACTATTCCGCAGGCTGACGCGATGAAAGAAGCGGGCATCAATGTTGATTACGTTCTGGAGTTCGACGTACCGGACGAACTGATTGTTGATCGTATTGTTGGTCGCCGCGTTCACGCGCCATCTGGCCGTGTTTATCACGTTAAATTCAATCCGCCGAAAGTAGAAGG…	CGAGAGCCATTCGCCAGGCGGCGGATGAAGTGCTGGCAGGACAACATGATGATGAGTTCCCGCTGGCAATCTGGCAAACGGGATCCGGTACGCAAAGCAATATGAATATGAATGAAGTACTGGCTAACCGGGCCAGCGAATTGCTTGGCGGCGTACGCGGAATGGAACGTAAAGTTCACCCTAACGATGACGTGAACAAAAGCCAAAGCTCCAATGATGTCTTCCCAACTGCTATGCACGTGGCGGCGTTATTGGCACTGCGTAAGCAACTCATTCCTCAGCTCAAAAACCTCACTCAAACTCTGAATGAGAAATCGCGCGCATTTGCCGATATCGTCAAAATTGGTCGTACCCACTTGCAGGACGCCACACCGCTGACTCTGGGACAGGAGATTTCTG…	GGTCTGCACGGCGTTGGTGTTTCGGTAGTAAACGCCCTGTCGCAAAAACTGGAGCTGGTTATTCAGCGCGAGGGTAAAATTCACCGTCAGATCTACGAACACGGTGTTCCGCAGGCACCGCTGGCGGTTACTGGTGACACCGACAAAACCGGCACCATGGTGCGTTTCTGGCCAAGCCTTGAAACTTTCACCAATGTGACCGAGTTCGAATACGATATTCTGGCGAAGCGTCTGCGTGAGCTGTCCTTCCTCAATTCCGGCGTGTCTATTCGTCTGAAAGACAAACGCGACGGCAAAGAAGACCACTTCCACTATGAAGGCGGCATTAAGGCGTTCGTTGAATATCTGAACAAGAACAAAACGCCGATTCACCCGAACATCTTCTACTTCTCCACCGAA…	CGATGCTGCCGTCGAGAAAGCCTATAAAGGTGAGCGTAAAATCTCCTGGATGGAAATTTACACCGGTGAAAAATCCACACAGGTTTATGGTCAGGACGTCTGGCTGCCTGCTGAAACCCTTGATCTGATTCGTGAATATCGCGTTGCTATCAAAGGCCCTCTGACCACTCCGGTTGGCGGCGGTATTCGTTCTCTTAACGTTGCCCTGCGCCAGGAGCTGGATCTTTACATCTGCCTGCGTCCGGTACGTTACTACCAGGGCACCCCAAGCCCGGTTAAACACCCTGAACTGACCGATATGGTTATCTTCCGTGAAAACTCGGAAGACATTTATGCGGGTATCGAATGGAAAGCTGACTCTGCCGACGCTGAGAAAGTGATCAAATTCCTGCGTGAAGA…	GGTGTAGCGCGTAAACCGGGTATGGATCGTTCCGACCTGTTTAACGTTAACGCCGGTATTGTGAAGAATCTGGTTCAGCAAGTTGCGAAAACTTGCCCGAAAGCGTGCATTGGCATTATCACTAACCCGGTTAACACCACTGTGGCTATCGCTGCGGAAGTGCTGAAAAAAGCCGGTGTTTATGACAAAAACAAGCTGTTTGGCGTTACTACGCTGGATATTATTCGTTCCAACACCTTTGTCGCGGAACTGAAAGGTAAACAACCGGGTGATGTAGAAGTGCCGGTTATTGGCGGTCACTCTGGCGTTACTATTCTGCCGCTGCTGTCACAGGTTCCTGGCATCAGTTTTACTGAGCAGGAAGTCGCAGATCTGACCAAACGTATCCAGAACGCGGGC…	ATAACGCGCGTGAGAAAGCGCGCGGCGCGAAAGCGATCGGCACCACGGGGCGTGGTATCGGGCCTGCTTATGAAGATAAAGTGGCACGTCGCGGTCTGCGTGTTGGCGACCTTTTCGACAAAGAAACCTTCGCTGAAAAACTGAAAGAAGTGATGGAATATCACAACTTCCAGTTGGTTAACTACTACAAAGTTGAAGCGGTTGATTACCAGAAAGTTCTGGATGATGTGATGGCCGTTGCCGACATCCTGACTTCCATGGTGGTTGACGTTTCTGACCTGCTTGACCAGGCGCGTCAGCGTGGCGATTTCGTCATGTTTGAAGGTGCGCAGGGTACGCTTCTGGATATCGACCACGGTACTTATCCGTACGTAACCTCTTCCAACACCACTGCGGGCG…	TGCTCGTAAACTGGGCGTCGATATCGACAACCTGCTGTGTTCCCAGCCGGACACTGGCGAACAGGCGCTGGAAATCTGTGACGCCCTGGCGCGCTCTGGCGCAGTAGATGTTATCGTTGTTGACTCCGTAGCGGCACTGACGCCGAAAGCGGAAATCGAAGGTGAAATCGGCGACTCTCACATGGGCCTTGCGGCACGTATGATGAGCCAGGCGATGCGTAAGCTGGCGGGTAACCTGAAGCAGTCCAACACGCTGCTGATCTTCATCAACCAGATCCGTATGAAAATTGGTGTGATGTTCGGTAACCCGGAAACCACTACCGGTGGTAACGCGCTGAAATTCTACGCCTCTGTTCGTCTCGACATCCGTCGTATCGGCGCGGTGAAAGAGGGCGAAAA…
2431	GGGGAAAGGGACTCAGGCTCAGTTCATCATGGAGAAATATGGTATTCCGCAAATCTCCACAGGTGATATGCTGCGTGCCGCAGTCAAATCTGGCTCCGAGCTGGGTAAACAAGCAAAAGACATTATGGACGCTGGCAAACTGGTTACCGATGAACTGGTGATCGCGCTGGTTAAAGAACGTATTGCTCAGGAAGACTGCCGTAACGGTTTCCTGCTTGACGGCTTCCCGCGTACTATTCCGCAGGCTGACGCGATGAAAGAAGCGGGCATCAATGTTGATTACGTTCTGGAGTTCGACGTACCGGACGAACTGATTGTTGATCGTATTGTTGGTCGCCGCGTTCACGCGCCATCTGGCCGTGTTTATCACGTTAAATTTAATCCGCCGAAAGTAGAAGG…	CGAGAGCCATTCGCCAGGCGGCGGATGAAGTGCTGGCAGGGCAACATGATGATGAGTTCCCGCTGGCAATCTGGCAAACGGGATCCGGTACGCAAAGCAATATGAATATGAATGAAGTACTGGCTAATCGGGCCAGCGAATTGCTTGGCGGCGTACGCGGAATGGAACGTAAAGTTCACCCTAACGATGACGTGAACAAAAGCCAAAGCTCCAATGATGTCTTCCCAACTGCTATGCACGTAGCGGCGTTATTGGCACTGCGTAAGCAACTCATTCCTCAGCTCAAAAACCTCACTCAAACTCTGAATGAGAAATCGCGCGCATTTGCCGATATCGTCAAAATTGGTCGTACCCACTTGCAGGACGCCACACCGCTGACCCTGGGACAGGAGATTTCTG…	GGTCTGCACGGCGTTGGTGTTTCGGTAGTAAACGCCCTGTCGCAAAAACTGGAGCTGGTTATTCAGCGCGAGGGTAAAATTCACCGTCAGATCTACGAACACGGTGTTCCGCAGGCACCGCTGGCGGTTACTGGTGACACCGACAAAACCGGCACCATGGTGCGTTTCTGGCCAAGCCTTGAAACTTTCACCAATGTGACCGAGTTCGAATACGATATTCTGGCGAAGCGTCTGCGTGAGCTGTCCTTCCTCAACTCCGGCGTGTCTATTCGTCTGAAAGACAAACGCGACGGCAAAGAAGACCACTTCCACTATGAAGGCGGCATTAAGGCGTTCGTTGAATATCTGAACAAGAACAAAACGCCGATTCACCCGAACATCTTCTACTTCTCCACCGAA…	CGATGCTGCCGTCGAGAAAGCCTATAAAGGTGAGCGTAAAATCTCCTGGATGGAAATTTACACCGGTGAAAAATCCACACAGGTTTATGGTCAGGACGTCTGGCTGCCTGCTGAAACCCTTGATCTGATTCGTGAATATCGCGTTGCTATCAAAGGCCCTCTGACCACTCCGGTTGGCGGCGGTATTCGTTCTCTTAACGTTGCCCTGCGTCAGGAGCTGGATCTTTACATCTGCCTGCGTCCGGTACGTTACTACCAGGGCACCCCAAGCCCGGTTAAACACCCTGAACTGACCGATATGGTTATCTTCCGTGAAAACTCGGAAGACATTTATGCGGGTATCGAATGGAAAGCTGACTCTGCCGACGCTGAGAAAGTGATCAAATTCCTGCGTGAAGA…	GGTGTAGCGCGTAAACCGGGTATGGATCGTTCCGACCTGTTTAACGTTAACGCCGGTATTGTGAAGAATCTGGTTCAGCAAGTTGCGAAAACTTGCCCGAAAGCGTGCATTGGCATTATCACTAACCCGGTTAACACCACTGTGGCTATCGCTGCGGAAGTGCTGAAAAAAGCCGGTGTTTATGACAAAAACAAGCTGTTTGGCGTTACTACGCTGGATATTATTCGTTCCAACACCTTTGTCGCGGAACTGAAAGGTAAACAACCGGGTGATGTAGAAGTGCCGGTTATTGGCGGTCACTCTGGCGTTACTATTCTGCCGCTGCTGTCACAGGTTCCTGGCATCAGTTTTACCGAGCAGGAAGTCGCAGATCTGACCAAACGTATCCAGAACGCGGGC…	ATAACGCGCGTGAGAAAGCGCGTGGCGCGAAAGCGATCGGCACCACGGGGCGTGGTATCGGGCCTGCTTATGAAGATAAAGTGGCACGTCGCGGTCTGCGTGTTGGCGACCTTTTCGACAAAGAAACCTTCGCTGAAAAACTGAAAGAAGTGATGGAATATCACAACTTCCAGTTGGTTAACTACTACAAAGTTGAAGCGGTTGATTACCAGAAAGTTCTGGATGATGTGATGGCCGTTGCTGACATCCTGACTTCCATGGTGGTTGACGTTTCTGACCTGCTTGACCAGGCGCGTCAGCGTGGCGATTTCGTCATGTTTGAAGGTGCGCAGGGTACGCTTCTGGATATCGACCACGGTACTTATCCGTACGTAACCTCTTCCAACACCACTGCGGGCG…	TGCTCGTAAACTGGGCGTCGATATTGACAACCTGCTGTGTTCCCAGCCGGACACTGGCGAACAGGCGCTGGAAATCTGTGACGCCCTGGCGCGCTCTGGCGCAGTAGACGTTATCGTTGTTGACTCCGTAGCGGCACTGACGCCGAAAGCGGAAATCGAAGGTGAAATCGGCGACTCTCACATGGGCCTTGCGGCACGTATGATGAGCCAGGCGATGCGTAAGCTGGCGGGTAACCTGAAGCAGTCCAACACGCTGCTGATCTTCATCAACCAGATCCGTATGAAAATTGGTGTGATGTTCGGTAACCCGGAAACCACTACCGGTGGTAACGCGCTGAAATTCTACGCCTCTGTTCGTCTCGACATCCGTCGTATCGGCGCGGTGAAAGAGGGCGAAAA…
2434	GGGGAAAGGGACTCAGGCTCAGTTCATCATGGAGAAATATGGTATTCCGCAAATCTCCACAGGTGATATGCTGCGTGCCGCAGTCAAATCTGGCTCCGAGCTGGGTAAACAAGCAAAAGACATTATGGACGCTGGCAAACTGGTTACCGATGAACTGGTGATCGCGCTGGTTAAAGAACGTATTGCTCAGGAAGACTGCCGTAACGGTTTCCTGCTTGACGGCTTCCCGCGTACTATTCCGCAGGCTGACGCGATGAAAGAAGCGGGCATCAATGTTGATTACGTTCTGGAGTTCGACGTACCGGACGAACTGATTGTTGATCGTATTGTTGGTCGCCGCGTTCACGCGCCATCTGGCCGTGTTTATCACGTTAAATTCAATCCGCCGAAAGTAGAAGG…	CGAGAGCCATTCGCCAGGCGGCGGATGAAGTGCTGGCAGGGCAACATGATGATGAGTTCCCGCTGGCAATCTGGCAAACGGGATCCGGTACGCAAAGCAATATGAATATGAATGAAGTACTGGCTAATCGGGCCAGCGAATTGCTTGGCGGCGTACGCGGAATGGAACGTAAAGTTCACCCTAACGATGACGTGAACAAAAGCCAAAGCTCCAATGATGTCTTCCCAACTGCTATGCACGTAGCGGCGTTATTGGCACTGCGTAAGCAACTCATTCCTCAGCTCAAAAACCTCACTCAAACTCTGAATGAGAAATCGCGTGCATTTGCCGATATCGTCAAAATTGGTCGTACCCACTTGCAGGACGCCACACCGCTGACCCTGGGACAGGAGATTTCTG…	GGTCTGCACGGCGTTGGTGTTTCGGTAGTAAACGCCCTGTCGCAAAAACTGGAGCTGGTTATTCAGCGCGAGGGTAAAATTCACCGTCAGATCTACGAACACGGTGTTCCGCAAGCACCGCTGGCGGTTACTGGTGACACCGACAAAACCGGCACCATGGTGCGTTTCTGGCCAAGCCTTGAAACTTTCACCAATGTGACCGAGTTCGAATACGATATTCTGGCGAAGCGTCTGCGTGAGCTGTCCTTCCTCAACTCCGGCGTGTCTATTCGTCTGAAAGACAAACGCGACGGCAAAGAAGACCACTTCCACTATGAAGGCGGCATTAAGGCGTTCGTTGAATATCTGAACAAGAACAAAACGCCGATTCACCCGAACATCTTCTACTTCTCCACCGAA…	CGATGCTGCCGTCGAGAAAGCCTATAAAGGTGAGCGTAAAATCTCCTGGATGGAAATTTACACCGGTGAAAAATCCACACAGGTTTATGGTCAGGACGTCTGGCTGCCTGCTGAAACCCTTGATCTGATTCGTGAATATCGCGTTGCTATCAAAGGCCCTCTGACCACTCCGGTTGGCGGCGGTATTCGTTCTCTTAACGTTGCCCTGCGTCAGGAGCTGGATCTTTACATCTGCCTGCGTCCGGTACGTTACTACCAGGGCACCCCAAGCCCGGTTAAACACCCTGAACTGACCGATATGGTTATCTTCCGTGAAAACTCGGAAGACATTTATGCGGGTATCGAATGGAAAGCTGACTCTGCCGACGCTGAGAAAGTGATCAAATTCCTGCGTGAAGA…	GGTGTAGCGCGTAAACCGGGTATGGATCGTTCCGACCTGTTTAACGTTAACGCCGGTATTGTAAAGAATCTGGTTCAGCAAGTTGCGAAAACTTGCCCGAAAGCGTGCATTGGCATTATCACTAACCCGGTTAACACCACTGTGGCTATCGCTGCGGAAGTGCTGAAAAAAGCCGGTGTTTATGACAAAAACAAGCTGTTTGGCGTTACTACGCTGGATATTATTCGTTCCAACACCTTTGTCGCGGAACTGAAAGGTAAACAACCGGGTGATGTAGAAGTGCCGGTTATTGGCGGTCACTCTGGCGTTACTATTCTGCCGCTGCTGTCACAGGTTCCTGGCATCAGTTTTACCGAGCAGGAAGTCGCAGATCTGACCAAACGTATCCAGAACGCGGGC…	ATAACGCGCGTGAGAAAGCGCGTGGCGCGAAAGCGATCGGCACCACGGGGCGTGGTATCGGGCCTGCTTATGAAGATAAAGTGGCACGTCGCGGTCTGCGTGTTGGCGACCTTTTCGACAAAGAAACCTTCGCTGAAAAACTGAAAGAAGTGATGGAATATCACAACTTCCAGTTGGTTAACTACTACAAAGTTGAAGCGGTTGATTACCAGAAAGTTCTGGATGATGTGATGGCCGTTGCCGACATCCTGACTTCCATGGTGGTTGACGTTTCTGACCTGCTTGACCAGGCGCGTCAGCGTGGCGATTTCGTCATGTTTGAAGGTGCGCAGGGTACGCTTCTGGATATCGACCACGGTACTTATCCGTACGTAACCTCTTCCAACACCACTGCGGGTG…	TGCTCGTAAACTGGGCGTCGATATTGACAACCTGCTGTGTTCCCAGCCGGACACTGGCGAACAGGCGCTGGAAATCTGTGACGCCCTGGCGCGCTCTGGCGCAGTAGACGTTATCGTTGTTGACTCCGTAGCGGCACTGACGCCGAAAGCGGAAATCGAAGGTGAAATCGGCGACTCTCACATGGGCCTTGCGGCACGTATGATGAGCCAGGCGATGCGTAAGCTGGCGGGTAACCTGAAGCAGTCCAACACGCTGCTGATCTTCATCAACCAGATCCGTATGAAAATTGGTGTGATGTTCGGTAACCCGGAAACCACTACCGGTGGTAACGCGCTGAAATTCTACGCCTCTGTTCGTCTCGACATCCGTCGTATCGGCGCGGTGAAAGAGGGCGAAAA…
2435	GGGGAAAGGGACTCAGGCTCAGTTCATCATGGAGAAATATGGTATTCCGCAAATCTCCACAGGTGATATGCTGCGTGCTGCGGTCAAATCTGGCTCCGAGCTGGGTAAACAAGCAAAAGACATTATGGACGCTGGCAAACTGGTTACCGATGAACTGGTGATCGCGCTGGTTAAAGAACGTATTGCTCAGGAAGACTGCCGTAACGGTTTCCTGCTTGACGGCTTCCCGCGTACTATTCCGCAGGCTGACGCGATGAAAGAAGCGGGCATCAATGTTGATTACGTTCTGGAGTTCGACGTACCGGACGAACTGATTGTTGATCGTATTGTTGGTCGCCGCGTTCACGCGCCATCTGGTCGTGTTTATCACGTTAAATTTAATCCGCCGAAAGTAGAAGG…	CGAGAGCCATTCGCCAGGCGGCGGATGAAGTGCTGGCAGGGCAACATGATGATGAGTTCCCGCTGGCAATCTGGCAAACGGGATCCGGTACGCAAAGCAATATGAATATGAATGAAGTACTGGCTAATCGGGCCAGCGAATTGCTTGGCGGCGTACGCGGAATGGAACGTAAAGTTCACCCTAACGATGACGTGAACAAAAGCCAAAGCTCCAATGATGTCTTCCCAACTGCTATGCACGTGGCGGCGTTATTGGCACTGCGTAAGCAACTCATTCCTCAGCTCAAAAACCTCACTCAAACTCTGAATGAGAAATCGCGTGCATTTGCCGATATCGTCAAAATTGGTCGTACCCACTTGCAGGACGCCACACCGCTGACCTTGGGACAGGAGATTTCTG…	GGTCTGCACGGCGTTGGTGTTTCGGTAGTAAACGCCCTGTCGCAAAAACTGGAGCTGGTTATTCAGCGCGAGGGTAAAATTCACCGTCAGATCTACGAACACGGTGTTCCGCAGGCACCGCTGGCGGTTACTGGTGACACCGACAAAACCGGCACCATGGTGCGTTTCTGGCCAAGCCTTGAAACTTTCACCAATGTGACCGAGTTCGAATACGATATTCTGGCGAAGCGTCTGCGTGAGCTGTCCTTCCTCAATTCCGGCGTGTCTATTCGTCTGAAAGACAAACGCGACGGCAAAGAAGACCACTTCCACTATGAAGGCGGCATTAAGGCGTTCGTTGAATATCTGAACAAGAACAAAACGCCGATTCACCCGAACATCTTCTACTTCTCCACCGAA…	CGACGCTGCCGTCGAGAAAGCCTATAAAGGCGAGCGTAAAATCTCCTGGATGGAAATTTACACCGGTGAAAAATCCACACAGGTTTATGGTCAGGACGTCTGGCTGCCTGCTGAAACCCTTGATCTGATTCGTGAATATCGCGTTGCTATCAAAGGCCCTCTGACCACTCCGGTTGGCGGCGGTATTCGTTCTCTTAACGTTGCCCTGCGTCAGGAGCTGGATCTTTACATCTGCCTGCGTCCGGTACGTTACTACCAGGGCACCCCAAGCCCGGTTAAACACCCTGAACTGACCGATATGGTTATCTTCCGTGAAAACTCGGAAGACATTTATGCGGGTATCGAATGGAAAGCTGACTCTGCCGACGCTGAGAAAGTGATCAAATTCCTGCGTGAAGA…	GGCGTAGCGCGTAAACCGGGTATGGATCGTTCCGACCTGTTTAACGTTAACGCCGGTATTGTGAAGAATCTGGTTCAGCAAGTTGCGAAAACTTGCCCGAAAGCGTGCATTGGCATTATCACTAACCCGGTTAACACCACTGTGGCTATCGCTGCGGAAGTGCTGAAAAAAGCCGGTGTTTATGACAAAAACAAGCTGTTTGGCGTTACTACGCTGGATATTATTCGTTCCAACACCTTTGTCGCGGAACTGAAAGGTAAACAACCGGGTGATGTAGAAGTGCCGGTTATTGGCGGTCACTCTGGCGTTACTATTCTGCCGCTGCTGTCACAGGTTCCTGGCATCAGTTTTACCGAGCAGGAAGTCGCAGATCTGACCAAACGTATCCAGAACGCGGGC…	ATAACGCGCGTGAGAAAGCGCGTGGCGCGAAAGCGATCGGCACCACGGGGCGTGGTATCGGGCCTGCTTATGAAGATAAAGTGGCACGTCGCGGTCTGCGTGTTGGCGACCTTTTCGACAAAGAAACCTTCGCTGAAAAACTGAAAGAAGTGATGGAATATCACAACTTCCAGTTGGTTAACTACTACAAAGTTGAAGCGGTTGATTACCAGAAAGTTCTGGATGATGTGATGGCCGTTGCCGACATCCTGACTTCCATGGTGGTTGACGTTTCTGACCTGCTTGACCAGGCGCGTCAGCGTGGCGATTTCGTCATGTTTGAAGGTGCGCAGGGTACGCTTCTGGATATCGACCACGGTACTTATCCGTACGTAACCTCTTCCAACACCACTGCGGGTG…	TGCTCGTAAACTGGGCGTCGATATCGACAACCTGCTGTGTTCCCAGCCGGACACTGGCGAACAGGCGCTGGAAATCTGTGACGCCCTGGCGCGCTCTGGCGCAGTAGATGTTATCGTTGTTGACTCCGTAGCGGCACTGACGCCGAAAGCGGAAATCGAAGGTGAAATCGGCGACTCTCACATGGGCCTTGCGGCACGTATGATGAGCCAGGCGATGCGTAAGCTGGCGGGTAACCTGAAGCAGTCCAACACGCTGCTGATCTTCATCAACCAGATCCGTATGAAAATTGGTGTGATGTTCGGTAACCCGGAAACCACTACCGGTGGTAACGCGCTGAAATTCTACGCCTCTGTTCGTCTCGACATCCGTCGTATCGGCGCGGTGAAAGAGGGCGAAAA…
2445	GGGGAAAGGGACTCAGGCTCAGTTCATCATGGAGAAATATGGTATTCCGCAAATCTCCACAGGTGATATGCTGCGTGCTGCGGTCAAATCTGGCTCCGAGCTGGGTAAACAAGCAAAAGACATTATGGACGCTGGCAAACTGGTTACCGATGAACTGGTGATCGCGCTGGTTAAAGAACGTATTGCTCAGGAAGACTGCCGTAACGGTTTCCTGCTTGACGGCTTCCCGCGTACTATTCCGCAGGCTGACGCGATGAAAGAAGCGGGCATCAATGTTGATTACGTTCTGGAGTTCGACGTACCGGACGAACTGATTGTTGATCGTATTGTTGGTCGCCGCGTTCACGCGCCATCTGGCCGTGTTTATCACGTTAAATTCAATCCGCCGAAAGTAGAAGG…	CGAGAGCTATTCGCCAGGCGGCGGATGAAGTGCTGGCAGGGCAACATGATGATGAGTTCCCGCTGGCAATCTGGCAAACGGGATCTGGTACGCAAAGCAATATGAATATGAATGAAGTACTGGCTAACCGGGCCAGCGAATTGCTTGGCGGCGTACGCGGAATGGAACGTAAAGTTCACCCTAACGATGACGTGAACAAAAGCCAAAGCTCCAATGATGTCTTCCCAACTGCTATGCACGTGGCGGCGTTATTGGCACTGCGTAAGCAACTCATTCCTCAGCTCAAAAACCTCACTCAAACTCTGAATGAGAAATCGCGCGCATTTGCCGATATCGTCAAAATTGGTCGTACCCACTTGCAGGACGCCACACCGCTGACTCTGGGACAGGAGATTTCTG…	GGTCTGCACGGCGTTGGTGTTTCGGTAGTAAACGCCCTGTCGCAAAAACTGGAGCTGGTTATTCAGCGCGAGGGTAAAATTCACCGTCAGATCTACGAACACGGTGTTCCGCAGGCACCGCTGGCGGTTACTGGTGACACCGACAAAACCGGCACCATGGTGCGTTTCTGGCCAAGCCTTGAAACTTTCACCAATGTGACCGAGTTCGAATACGATATTCTGGCGAAGCGTCTGCGTGAGCTGTCCTTCCTCAATTCCGGCGTGTCTATTCGTCTGAAAGACAAACGCGACGGCAAAGAAGACCACTTCCACTATGAAGGCGGCATTAAGGCGTTCGTTGAATATCTGAACAAGAACAAAACGCCGATTCACCCGAACATCTTCTACTTCTCCACCGAA…	CGACGCTGCCGTCGAGAAAGCCTATAAAGGCGAGCGTAAAATCTCCTGGATGGAAATTTACACCGGTGAAAAATCCACACAGGTTTATGGTCAGGACGTCTGGTTGCCTGCTGAAACCCTTGATCTGATTCGTGAATATCGCGTTGCTATCAAAGGCCCTCTGACCACTCCGGTTGGCGGCGGTATTCGTTCTCTTAACGTTGCCCTGCGCCAGGAGCTGGATCTTTACATCTGCCTGCGTCCGGTACGTTACTACCAGGGCACCCCAAGCCCGGTTAAACACCCTGAACTGACCGATATGGTTATCTTCCGTGAAAACTCGGAAGACATTTATGCGGGTATCGAATGGAAAGCTGACTCTGCCGACGCTGAGAAAGTGATCAAATTCCTGCGTGAAGA…	GGTGTAGCGCGTAAACCGGGTATGGATCGTTCCGACCTGTTTAACGTTAACGCCGGTATTGTGAAGAATCTGGTTCAGCAAGTTGCGAAAACTTGCCCGAAAGCGTGCATTGGCATTATCACTAACCCGGTTAACACCACTGTGGCTATCGCTGCGGAAGTGCTGAAAAAAGCCGGTGTTTATGACAAAAACAAGCTGTTTGGCGTTACTACGCTGGATATTATTCGTTCCAACACCTTTGTCGCGGAACTGAAAGGTAAACAACCGGGTGATGTAGAAGTGCCGGTTATTGGCGGTCACTCTGGCGTTACTATTCTGCCGCTGCTGTCACAGGTTCCTGGCGTCAGTTTTACCGAGCAGGAAGTCGCAGATCTGACCAAACGTATCCAGAACGCGGGT…	ATAACGCGCGTGAGAAAGCGCGTGGCGCGAAAGCGATCGGCACCACGGGGCGTGGTATCGGGCCTGCTTATGAAGATAAAGTGGCACGTCGCGGTCTGCGTGTTGGCGACCTTTTCGACAAAGAAACCTTCGCTGAAAAACTGAAAGAAGTGATGGAATATCACAACTTCCAGTTGGTTAACTACTACAAAGTTGAAGCGGTTGATTACCAGAAAGTTCTGGATGATGTGATGGCCGTTGCCGACATCCTGACTTCCATGGTGGTTGACGTTTCTGACCTGCTCGATCAGGCGCGTCAGCGTGGCGATTTCGTCATGTTTGAAGGTGCGCAGGGTACGCTTCTGGATATCGACCACGGTACTTATCCGTACGTAACCTCTTCCAACACCACTGCGGGTG…	TGCTCGTAAACTGGGCGTCGATATCGACAACCTGCTGTGTTCCCAGCCGGACACTGGCGAACAGGCGCTGGAAATCTGTGACGCCCTGGCGCGCTCTGGCGCAGTAGATGTTATCGTTGTTGACTCCGTAGCGGCACTGACGCCGAAAGCGGAAATCGAAGGTGAAATCGGCGACTCTCACATGGGCCTTGCGGCACGTATGATGAGCCAGGCGATGCGTAAGCTGGCGGGTAACCTGAAGCAGTCCAACACGCTGCTGATCTTCATCAACCAGATCCGTATGAAAATTGGTGTGATGTTCGGTAACCCGGAAACCACTACCGGTGGTAACGCGCTGAAATTCTACGCCTCTGTTCGTCTCGACATCCGTCGTATCGGCGCGGTGAAAGAGGGCGAAAA…
2448	GGGGAAAGGGACTCAGGCTCAGTTCATCATGGAGAAATATGGTATTCCGCAAATCTCCACAGGTGATATGCTGCGTGCTGCGGTCAAATCTGGCTCCGAGCTGGGTAAACAAGCAAAAGACATTATGGACGCTGGCAAACTGGTTACCGATGAACTGGTGATCGCGCTGGTTAAAGAACGTATTGCTCAGGAAGACTGCCGTAACGGTTTCCTGCTTGACGGCTTCCCGCGTACTATTCCGCAGGCTGACGCGATGAAAGAAGCGGGCATCAATGTTGATTACGTTCTGGAGTTCGACGTACCGGACGAACTGATTGTTGATCGTATTGTTGGTCGCCGCGTTCACGCGCCATCTGGCCGTGTTTATCACGTTAAATTCAATCCGCCGAAAGTAGAAGG…	CGAGAGCTATTCGCCAGGCGGCGGATGAAGTGCTGGCAGGGCAACATGATGATGAGTTCCCGCTGGCAATCTGGCAAACGGGATCTGGTACGCAAAGCAATATGAATATGAATGAAGTACTGGCTAACCGGGCCAGCGAATTGCTTGGCGGCGTACGCGGAATGGAACGTAAAGTTCACCCTAACGATGACGTGAACAAAAGCCAAAGCTCCAATGATGTCTTCCCAACTGCTATGCACGTGGCGGCGTTATTGGCACTGCGTAAGCAACTCATTCCTCAGCTCAAAAACCTCACTCAAACTCTGAATGAGAAATCGCGCGCATTTGCCGATATCGTCAAAATTGGTCGTACCCACTTGCAGGACGCCACACCGCTGGCTCTGGGACAGGAGATTTCTG…	GGTCTGCACGGCGTTGGTGTTTCGGTAGTAAACGCCCTGTCGCAAAAACTGGAGCTGGTTATTCAGCGCGAGGGTAAAATTCACCGTCAGATCTACGAACACGGTGTTCCGCAGGCACCGCTGGCGGTTACTGGTGACACCGACAAAACCGGCACCATGGTGCGTTTCTGGCCAAGCCTTGAAACTTTCACCAATGTGACCGAGTTCGAATACGATATTCTGGCGAAGCGTCTGCGTGAGCTGTCCTTCCTCAATTCCGGCGTGTCTATTCGTCTGAAAGACAAACGCGACGGCAAAGAAGACCACTTCCACTATGAAGGCGGCATTAAGGCGTTCGTTGAATATCTGAACAAGAACAAAACGCCGATTCACCCGAACATCTTCTACTTCTCCACCGAA…	CGACGCTGCCGTCGAGAAAGCCTATAAAGGCGAGCGTAAAATCTCCTGGATGGAAATTTACACCGGTGAAAAATCCACACAGGTTTATGGTCAGGACGTCTGGTTGCCTGCTGAAACCCTTGATCTGATTCGTGAATATCGCGTTGCTATCAAAGGCCCTCTGACCACTCCGGTTGGCGGCGGTATTCGTTCTCTTAACGTTGCCCTGCGCCAGGAGCTGGATCTTTACATCTGCCTGCGTCCGGTACGTTACTACCAGGGCACCCCAAGCCCGGTTAAACACCCTGAACTGACCGATATGGTTATCTTCCGTGAAAACTCGGAAGACATTTATGCGGGTATCGAATGGAAAGCTGACTCTGCCGACGCTGAGAAAGTGATCAAATTCCTGCGTGAAGA…	GGTGTAGCGCGTAAACCGGGTATGGATCGTTCCGACCTGTTTAACGTTAACGCCGGTATTGTGAAGAATCTGGTTCAGCAAGTTGCGAAAACTTGCCCGAAAGCGTGCATTGGCATTATCACTAACCCGGTTAACACCACTGTGGCTATCGCTGCGGAAGTGCTGAAAAAAGCCGGTGTTTATGACAAAAACAAGCTGTTTGGCGTTACTACGCTGGATATTATTCGTTCCAACACCTTTGTCGCGGAACTGAAAGGTAAACAACCGGGTGATGTAGAAGTGCCGGTTATTGGCGGTCACTCTGGCGTTACTATTCTGCCGCTGCTGTCACAGGTTCCTGGCGTCAGTTTTACCGAGCAGGAAGTCGCAGATCTGACCAAACGTATCCAGAACGCGGGT…	ATAACGCGCGTGAGAAAGCGCGTGGCGCGAAAGCGATCGGCACCACGGGGCGTGGTATCGGGCCTGCTTATGAAGATAAAGTGGCACGTCGCGGTCTGCGTGTTGGCGACCTTTTCGACAAAGAAACCTTCGCTGAAAAACTGAAAGAAGTGATGGAATATCACAACTTCCAGTTGGTTAACTACTACAAAGTTGAAGCGGTTGATTACCAGAAAGTTCTGGATGATGTGATGGCCGTTGCCGACATCCTGACTTCCATGGTGGTTGACGTTTCTGACCTGCTCGATCAGGCGCGTCAGCGTGGCGATTTCGTCATGTTTGAAGGTGCGCAGGGTACGCTTCTGGATATCGACCACGGTACTTATCCGTACGTAACCTCTTCCAACACCACTGCGGGTG…	TGCTCGTAAACTGGGCGTCGATATCGACAACCTGCTGTGTTCCCAGCCGGACACTGGCGAACAGGCGCTGGAAATCTGTGACGCCCTGGCGCGCTCTGGCGCAGTAGATGTTATCGTTGTTGACTCCGTAGCGGCACTGACGCCGAAAGCGGAAATCGAAGGTGAAATCGGCGACTCTCACATGGGCCTTGCGGCACGTATGATGAGCCAGGCGATGCGTAAGCTGGCGGGTAACCTGAAGCAGTCCAACACGCTGCTGATCTTCATCAACCAGATCCGTATGAAAATTGGTGTGATGTTCGGTAACCCGGAAACCACTACCGGTGGTAACGCGCTGAAATTCTACGCCTCTGTTCGTCTCGACATCCGTCGTATCGGCGCGGTGAAAGAGGGCGAAAA…
2461	GGGGAAAGGGACTCAGGCTCAGTTCATCATGGAGAAATATGGTATTCCGCAAATCTCCACAGGTGATATGCTGCGTGCTGCGGTCAAATCTGGCTCCGAGCTGGGTAAACAAGCAAAAGACATTATGGACGCTGGCAAACTGGTTACCGATGAACTGGTGATCGCGCTGGTTAAAGAACGTATTGCTCAGGAAGACTGCCGTAACGGTTTCCTGCTTGACGGCTTCCCGCGTACTATTCCGCAGGCTGACGCGATGAAAGAAGCGGGCATCAATGTTGATTACGTTCTGGAGTTCGACGTACCGGACGAACTGATTGTTGATCGTATTGTTGGTCGCCGCGTTCACGCGCCATCTGGCCGTGTTTATCACGTTAAATTCAATCCGCCGAAAGTAGAAGG…	CGAGAGCTATTCGCCAGGCGGCGGATGAAGTGCTGGCAGGGCAACATGATGATGAGTTCCCGCTGGCAATCTGGCAAACGGGATCTGGTACGCAAAGCAATATGAATATGAATGAAGTACTGGCTAACCGGGCCAGCGAATTGCTTGGCGGCGTACGCGGAATGGAACGTAAAGTTCACCCTAACGATGACGTGAACAAAAGCCAAAGCTCCAATGATGTCTTCCCAACTGCTATGCACGTGGCGGCGTTATTGGCACTGCGTAAGCAACTCATTCCTCAGCTCAAAAACCTCACTCAAACTCTGAATGAGAAATCGCGCGCATTTGCCGATATCGTCAAAATTGGTCGTACCCACTTGCAGGACGCCACACCGCTGACTCTGGGACAGGAGATTTCTG…	GGTCTGCACGGCGTTGGTGTTTCGGTAGTAAACGCCCTGTCGCAAAAACTGGAGCTGGTTATTCAGCGCGAGGGTAAAATTCACCGTCAGATCTACGAACACGGTGTTCCGCAGGCACCGCTGGCGGTTACTGGTGACACCGACAAAACCGGCACCATGGTGCGTTTCTGGCCAAGCCTTGAAACTTTCACCAATGTGACCGAGTTCGAATACGATATTCTGGCGAAGCGTCTGCGTGAGCTGTCCTTCCTCAATTCCGGCGTGTCTATTCGTCTGAAAGACAAACGCGACGGCAAAGAAGACCACTTCCACTATGAAGGCGGCATTAAGGCGTTCGTTGAATATCTGAACAAGAACAAAACGCCGATTCACCCGAACATCTTCTACTTCTCCACCGAA…	CGACGCTGCCGTCGAGAAAGCCTATAAAGGCGAGCGTAAAATCTCCTGGATGGAAATTTACACCGGTGAAAAATCCACACAGGTTTATGGTCAGGACGTCTGGTTGCCTGCTGAAACCCTTGATCTGATTCGTGAATATCGCGTTGCTATCAAAGGCCCTCTGACCACTCCGGTTGGCGGCGGTATTCGTTCTCTTAACGTTGCCCTGCGCCAGGAGCTGGATCTTTACATCTGCCTGCGTCCGGTACGTTACTACCAGGGCACCCCAAGCCCGGTTAAACACCCTGAACTGACCGATATGGTTATCTTCCGTGAAAACTCGGAAGACATTTATGCGGGTATCGAATGGAAAGCTGACTCTGCCGACGCTGAGAAAGTGATCAAATTCCTGCGTGAAGA…	GGTGTAGCGCGTAAACCGGGTATGGATCGTTCCGACCTGTTTAACGTTAACGCCGGTATTGTGAAGAATCTGGTTCAGCAAGTTGCGAAAACTTGCCCGAAAGCGTGCATTGGCATTATCACTAACCCGGTTAACACCACTGTGGCTATCGCTGCGGAAGTGCTGAAAAAAGCCGGTGTTTATGACAAAAACAAGCTGTTTGGCGTTACTACGCTGGATATTATTCGTTCCAACACCTTTGTCGCGGAACTGAAAGGTAAACAACCGGGTGATGTAGAAGTGCCGGTTATTGGCGGTCACTCTGGCGTTACTATTCTGCCGCTGCTGTCACAGGTTCCTGGCGTCAGTTTTACCGAGCAGGAAGTCGCAGATCTGACCAAACGTATCCAGAACGCGGGT…	ATAACGCGCGTGAGAAAGCGCGTGGCGCGAAAGCGATCGGCACCACGGGGCGTGGTATCGGGCCTGCTTATGAAGATAAAGTGGCACGTCGCGGTCTGCGTGTTGGCGACCTTTTCGACAAAGAAACCTTCGCTGAAAAACTGAAAGAAGTGATGGAATATCACAACTTCCAGTTGGTTAACTACTACAAAGTTGAAGCGGTTGATTACCAGAAAGTTCTGGATGATGTGATGGCCGTTGCCGACATCCTGACTTCCATGGTGGTTGACGTTTCTGACCTGCTCGATCAGGCGCGTCAGCGTGGCGATTTCGTCATGTTTGAAGGTGCGCAGGGTACGCTTCTGGATATCGACCACGGTACTTATCCGTACGTAACCTCTTCCAACACCACTGCGGGTG…	TGCTCGTAAACTGGGCGTCGATATCGACAACCTGCTGTGTTCCCAGCCGGACACTGGCGAACAGGCGCTGGAAATCTGTGACGCCCTGGCGCGCTCTGGCGCAGTAGATGTTATCGTTGTTGACTCCGTAGCGGCACTGACGCCGAAAGCGGAAATCGAAGGTGAAATCGGCGACTCTCACATGGGCCTTGCGGCACGTATGATGAGCCAGGCGATGCGTAAGCTGGCGGGTAACCTGAAGCAGTCCAACACGCTGCTGATCTTCATCAACCAGATCCGTATGAAAATTGGTGTGATGTTCGGTAACCCGGAAACCACTACCGGTGGTAACGCGCTGAAATTCTACGCCTCTGTTCGTCTCGACATCCGTCGTATCGGCGCGGTGAAAGAGGGCGAAAA…
2465	GGGGAAAGGGACTCAGGCTCAGTTCATCATGGAGAAATATGGTATTCCGCAAATCTCCACAGGTGATATGCTGCGTGCTGCGGTCAAATCTGGCTCCGAGCTGGGTAAACAAGCAAAAGACATTATGGACGCTGGCAAACTGGTTACCGATGAACTGGTGATCGCGCTGGTTAAAGAACGTATTGCTCAGGAAGACTGCCGTAACGGTTTCCTGCTTGACGGCTTCCCGCGTACTATTCCGCAGGCTGACGCGATGAAAGAAGCGGGCATCAATGTTGATTACGTTCTGGAGTTCGACGTACCGGACGAACTGATTGTTGATCGTATTGTTGGTCGCCGCGTTCACGCGCCATCTGGTCGTGTTTATCACGTTAAATTTAATCCGCCGAAAGTAGAAGG…	CGAGAGCCATTCGCCAGGCGGCGGATGAAGTGCTGGCAGGGCAACATGATGATGAGTTCCCGCTGGCAATCTGGCAAACGGGATCCGGTACGCAAAGCAATATGAATATGAATGAAGTACTGGCTAATCGGGCCAGCGAATTGCTTGGCGGCGTACGCGGAATGGAACGTAAAGTTCACCCTAACGATGACGTGAACAAAAGCCAAAGCTCCAATGATGTCTTCCCAACTGCTATGCACGTGGCGGCGTTATTGGCACTGCGTAAGCAACTCATTCCTCAGCTCAAAAACCTCACTCAAACTCTGAATGAGAAATCGCGTGCATTTGCCGATATCGTCAAAATTGGTCGTACCCACTTGCAGGACGCCACACCGCTGACCTTGGGACAGGAGATTTCTG…	GGTCTGCACGGCGTTGGTGTTTCGGTAGTAAACGCCCTGTCGCAAAAACTGGAGCTGGTTATTCAGCGCGAGGGTAAAATTCACCGTCAGATCTACGAACACGGTGTTCCGCAGGCACCGCTGGCGGTTACTGGTGACACCGACAAAACCGGCACCATGGTGCGTTTCTGGCCAAGCCTTGAAACTTTCACCAATGTGACCGAGTTCGAATACGATATTCTGGCGAAGCGTCTGCGTGAGCTGTCCTTCCTCAATTCCGGCGTGTCTATTCGTCTGAAAGACAAACGCGACGGCAAAGAAGACCACTTCCACTATGAAGGCGGCATTAAGGCGTTCGTTGAATATCTGAACAAGAACAAAACGCCGATTCACCCGAACATCTTCTACTTCTCCACCGAA…	CGACGCTGCCGTCGAGAAAGCCTATAAAGGCGAGCGTAAAATCTCCTGGATGGAAATTTACACCGGTGAAAAATCCACACAGGTTTATGGTCAGGACGTCTGGCTGCCTGCTGAAACCCTTGATCTGATTCGTGAATATCGCGTTGCTATCAAAGGCCCTCTGACCACTCCGGTTGGCGGCGGTATTCGTTCTCTTAACGTTGCCCTGCGTCAGGAGCTGGATCTTTACATCTGCCTGCGTCCGGTACGTTACTACCAGGGCACCCCAAGCCCGGTTAAACACCCTGAACTGACCGATATGGTTATCTTCCGTGAAAACTCGGAAGACATTTATGCGGGTATCGAATGGAAAGCTGACTCTGCCGACGCTGAGAAAGTGATCAAATTCCTGCGTGAAGA…	GGCGTAGCGCGTAAACCGGGTATGGATCGTTCCGACCTGTTTAACGTTAACGCCGGTATTGTGAAGAATCTGGTTCAGCAAGTTGCGAAAACTTGCCCGAAAGCGTGCATTGGCATTATCACTAACCCGGTTAACACCACTGTGGCTATCGCTGCGGAAGTGCTGAAAAAAGCCGGTGTTTATGACAAAAACAAGCTGTTTGGCGTTACTACGCTGGATATTATTCGTTCCAACACCTTTGTCGCGGAACTGAAAGGTAAACAACCGGGTGATGTAGAAGTGCCGGTTATTGGCGGTCACTCTGGCGTTACTATTCTGCCGCTGCTGTCACAGGTTCCTGGCATCAGTTTTACCGAGCAGGAAGTCGCAGATCTGACCAAACGTATCCAGAACGCGGGC…	ATAACGCGCGTGAGAAAGCGCGTGGCGCGAAAGCGATCGGCACCACGGGGCGTGGTATCGGGCCTGCTTATGAAGATAAAGTGGCACGTCGCGGTCTGCGTGTTGGCGACCTTTTCGACAAAGAAACCTTCGCTGAAAAACTGAAAGAAGTGATGGAATATCACAACTTCCAGTTGGTTAACTACTACAAAGTTGAAGCGGTTGATTACCAGAAAGTTCTGGATGATGTGATGGCCGTTGCCGACATCCTGACTTCCATGGTGGTTGACGTTTCTGACCTGCTTGACCAGGCGCGTCAGCGTGGCGATTTCGTCATGTTTGAAGGTGCGCAGGGTACGCTTCTGGATATCGACCACGGTACTTATCCGTACGTAACCTCTTCCAACACCACTGCGGGTG…	TGCTCGTAAACTGGGCGTCGATATCGACAACCTGCTGTGTTCCCAGCCGGACACTGGCGAACAGGCGCTGGAAATCTGTGACGCCCTGGCGCGCTCTGGCGCAGTAGATGTTATCGTTGTTGACTCCGTAGCGGCACTGACGCCGAAAGCGGAAATCGAAGGTGAAATCGGCGACTCTCACATGGGCCTTGCGGCACGTATGATGAGCCAGGCGATGCGTAAGCTGGCGGGTAACCTGAAGCAGTCCAACACGCTGCTGATCTTCATCAACCAGATCCGTATGAAAATTGGTGTGATGTTCGGTAACCCGGAAACCACTACCGGTGGTAACGCGCTGAAATTCTACGCCTCTGTTCGTCTCGACATCCGTCGTATCGGCGCGGTGAAAGAGGGCGAAAA…
2472	GGGGAAAGGGACTCAGGCTCAGTTCATCATGGAGAAATATGGTATTCCGCAAATCTCCACAGGTGATATGCTGCGTGCTGCGGTCAAATCTGGCTCCGAGCTGGGTAAACAAGCAAAAGACATTATGGACGCTGGCAAACTGGTTACCGATGAACTGGTGATCGCGCTGGTTAAAGAACGTATTGCTCAGGAAGACTGCCGTAACGGTTTCCTGCTTGACGGCTTCCCGCGTACTATTCCGCAGGCTGACGCGATGAAAGAAGCGGGCATCAATGTTGATTACGTTCTGGAGTTCGACGTACCGGACGAACTGATTGTTGATCGTATTGTTGGTCGCCGCGTTCACGCGCCATCTGGCCGTGTTTATCACGTTAAATTCAATCCGCCGAAAGTAGAAGG…	CGAGAGCTATTCGCCAGGCGGCGGATGAAGTGCTGGCAGGGCAACATGATGATGAGTTCCCGCTGGCAATCTGGCAAACGGGATCTGGTACGCAAAGCAATATGAATATGAATGAAGTACTGGCTAACCGGGCCAGCGAATTGCTTGGCGGCGTACGCGGAATGGAACGTAAAGTTCACCCTAACGATGACGTGAACAAAAGCCAAAGCTCCAATGATGTCTTCCCAACTGCTATGCACGTGGCGGCGTTATTGGCACTGCGTAAGCAACTCATTCCTCAGCTCAAAAACCTCACTCAAACTCTGAATGAGAAATCGCGCGCATTTGCCGATATCGTCAAAATTGGTCGTACCCACTTGCAGGACGCCACACCGCTGACTCTGGGACAGGAGATTTCTG…	GGTCTGCACGGCGTTGGTGTTTCGGTAGTAAACGCCCTGTCGCAAAAACTGGAGCTGGTTATTCAGCGCGAGGGTAAAATTCACCGTCAGATCTACGAACACGGTGTTCCGCAGGCACCGCTGGCGGTTACTGGTGACACCGACAAAACCGGCACCATGGTGCGTTTCTGGCCAAGCCTTGAAACTTTCACCAATGTGACCGAGTTCGAATACGATATTCTGGCGAAGCGTCTGCGTGAGCTGTCCTTCCTCAATTCCGGCGTGTCTATTCGTCTGAAAGACAAACGCGACGGCAAAGAAGACCACTTCCACTATGAAGGCGGCATTAAGGCGTTCGTTGAATATCTGAACAAGAACAAAACGCCGATTCACCCGAACATCTTCTACTTCTCCACCGAA…	CGATGCTGCCGTCGAGAAAGCCTATAAAGGTGAGCGTAAAATCTCCTGGATGGAAATTTACACCGGTGAAAAATCCACACAGGTTTATGGTCAGGACGTCTGGCTGCCTGCTGAAACCCTTGATCTGATTCGTGAATATCGCGTTGCTATCAAAGGCCCTCTGACCACTCCGGTTGGCGGCGGTATTCGTTCTCTTAACGTTGCCCTGCGCCAGGAGCTGGATCTTTACATCTGCCTGCGTCCGGTACGTTACTACCAGGGCACTCCAAGCCCGGTTAAACACCCTGAACTGACCGATATGGTTATCTTCCGTGAAAACTCGGAAGACATTTATGCGGGTATCGAATGGAAAGCTGACTCTGCCGACGCAGAGAAAGTGATTAAATTCCTGCGTGAAGA…	GGTGTAGCGCGTAAACCGGGTATGGATCGTTCCGACCTGTTTAACGTTAACGCCGGTATTGTGAAGAATCTGGTTCAGCAAGTTGCGAAAACTTGCCCGAAAGCGTGCATTGGCATTATCACTAACCCGGTTAACACCACTGTGGCTATCGCTGCGGAAGTGCTGAAAAAAGCCGGTGTTTATGACAAAAACAAGCTGTTTGGCGTTACTACGCTGGATATTATTCGTTCCAACACCTTTGTCGCGGAACTGAAAGGTAAACAACCGGGTGATGTAGAAGTGCCGGTTATTGGCGGTCACTCTGGCGTTACTATTCTGCCGCTGCTGTCACAGGTTCCTGGCGTCAGTTTTACCGAGCAGGAAGTCGCAGATCTGACCAAACGTATCCAGAACGCGGGT…	ATAACGCGCGTGAGAAAGCGCGTGGCGCGAAAGCGATCGGCACCACGGGGCGTGGTATCGGGCCTGCTTATGAAGATAAAGTGGCACGTCGCGGTCTGCGTGTTGGCGACCTTTTCGACAAAGAAACCTTCGCTGAAAAACTGAAAGAAGTGATGGAATATCACAACTTCCAGTTGGTTAACTACTACAAAGTTGAAGCGGTTGATTACCAGAAAGTTCTGGATGATGTGATGGCCGTTGCCGACATCCTGACTTCCATGGTGGTTGACGTTTCTGACCTGCTCGATCAGGCGCGTCAGCGTGGCGATTTCGTCATGTTTGAAGGTGCGCAGGGTACGCTTCTGGATATCGACCACGGTACTTATCCGTACGTAACCTCTTCCAACACCACTGCGGGCG…	TGCTCGTAAACTGGGCGTCGATATCGACAACCTGCTGTGTTCCCAGCCGGACACTGGCGAACAGGCGCTGGAAATCTGTGACGCCCTGGCGCGCTCTGGCGCAGTAGATGTTATCGTTGTTGACTCCGTAGCGGCACTGACGCCGAAAGCGGAAATCGAAGGTGAAATCGGCGACTCTCACATGGGCCTTGCGGCACGTATGATGAGCCAGGCGATGCGTAAGCTGGCGGGTAACCTGAAGCAGTCCAACACGCTGCTGATCTTCATCAACCAGATCCGTATGAAAATTGGTGTGATGTTCGGTAACCCGGAAACCACTACCGGTGGTAACGCGCTGAAATTCTACGCCTCTGTTCGTCTCGACATCCGTCGTATCGGCGCGGTGAAAGAGGGCGAAAA…
2475	GGGGAAAGGGACTCAGGCTCAGTTCATCATGGAGAAATATGGTATTCCGCAAATCTCCACAGGTGATATGCTGCGTGCTGCGGTCAAATCTGGCTCCGAGCTGGGTAAACAAGCAAAAGACATTATGGACGCTGGCAAACTGGTTACCGATGAACTGGTGATCGCGCTGGTTAAAGAACGTATTGCTCAGGAAGACTGCCGTAACGGTTTCCTGCTTGACGGCTTCCCGCGTACTATTCCGCAGGCTGACGCGATGAAAGAAGCGGGCATCAATGTTGATTACGTTCTGGAGTTCGACGTACCGGACGAACTGATTGTTGATCGTATTGTTGGTCGCCGCGTTCACGCGCCATCTGGCCGTGTTTATCACGTTAAATTCAATCCGCCGAAAGTAGAAGG…	CGAGAGCTATTCGCCAGGCGGCGGATGAAGTGCTGGCAGGGCAACATGATGATGAGTTCCCGCTGGCAATCTGGCAAACGGGATCTGGTACGCAAAGCAATATGAATATGAATGAAGTACTGGCTAACCGGGCCAGCGAATTGCTTGGCGGCGTACGCGGAATGGAACGTAAAGTTCACCCTAACGATGACGTGAACAAAAGCCAAAGCTCCAATGATGTCTTCCCAACTGCTATGCACGTGGCGGCGTTATTGGCACTGCGTAAGCAACTCATTCCTCAGCTCAAAAACCTCACTCAAACTCTGAATGAGAAATCGCGCGCATTTGCCGATATCGTCAAAATTGGTCGTACCCACTTGCAGGACGCCACACCGCTGACTCTGGGACAGGAGATTTCTG…	GGTCTGCACGGCGTTGGTGTTTCGGTAGTAAACGCCCTGTCGCAAAAACTGGAGCTGGTTATTCAGCGCGAGGGTAAAATTCACCGTCAGATCTACGAACACGGTGTTCCGCAGGCACCGCTGGCGGTTACTGGTGACACCGACAAAACCGGCACCATGGTGCGTTTCTGGCCAAGCCTTGAAACTTTCACCAATGTGACCGAGTTCGAATACGATATTCTGGCGAAGCGTCTGCGTGAGCTGTCCTTCCTCAATTCCGGCGTGTCTATTCGTCTGAAAGACAAACGTGACGGCAAAGAAGACCACTTCCACTATGAAGGCGGCATTAAGGCGTTCGTTGAATATCTGAACAAGAACAAAACGCCGATTCACCCGAACATCTTCTACTTCTCCACCGAA…	CGACGCTGCCGTCGAGAAAGCCTATAAAGGCGAGCGTAAAATCTCCTGGATGGAAATTTACACCGGTGAAAAATCCACACAGGTTTATGGTCAGGACGTCTGGTTGCCTGCTGAAACCCTTGATCTGATTCGTGAATATCGCGTTGCTATCAAAGGCCCTCTGACCACTCCGGTTGGCGGCGGTATTCGTTCTCTTAACGTTGCCCTGCGCCAGGAGCTGGATCTTTACATCTGCCTGCGTCCGGTACGTTACTACCAGGGCACCCCAAGCCCGGTTAAACACCCTGAACTGACCGATATGGTTATCTTCCGTGAAAACTCGGAAGACATTTATGCGGGTATCGAATGGAAAGCTGACTCTGCCGACGCTGAGAAAGTGATCAAATTCCTGCGTGAAGA…	GGTGTAGCGCGTAAACCGGGTATGGATCGTTCCGACCTGTTTAACGTTAACGCCGGTATTGTGAAGAATCTGGTTCAGCAAGTTGCGAAAACTTGCCCGAAAGCGTGCATTGGCATTATCACTAACCCGGTTAACACCACTGTGGCTATCGCTGCGGAAGTGCTGAAAAAAGCCGGTGTTTATGACAAAAACAAGCTGTTTGGCGTTACTACGCTGGATATTATTCGTTCCAACACCTTTGTCGCGGAACTGAAAGGTAAACAACCGGGTGATGTAGAAGTGCCGGTTATTGGCGGTCACTCTGGCGTTACTATTCTGCCGCTGCTGTCACAGGTTCCTGGCGTCAGTTTTACCGAGCAGGAAGTCGCAGATCTGACCAAACGTATCCAGAACGCGGGT…	ATAACGCGCGTGAGAAAGCGCGTGGCGCGAAAGCGATCGGCACCACGGGGCGTGGTATCGGGCCTGCTTATGAAGATAAAGTGGCACGTCGCGGTCTGCGTGTTGGCGACCTTTTCGACAAAGAAACCTTCGCTGAAAAACTGAAAGAAGTGATGGAATATCACAACTTCCAGTTGGTTAACTACTACAAAGTTGAAGCGGTTGATTACCAGAAAGTTCTGGATGATGTGATGGCCGTTGCCGACATCCTGACTTCCATGGTGGTTGACGTTTCTGACCTGCTCGATCAGGCGCGTCAGCGTGGCGATTTCGTCATGTTTGAAGGTGCGCAGGGTACGCTTCTGGATATCGACCACGGTACTTATCCGTACGTAACCTCTTCCAACACCACTGCGGGCG…	TGCTCGTAAACTGGGCGTCGATATCGACAACCTGCTGTGTTCCCAGCCGGACACTGGCGAACAGGCGCTGGAAATCTGTGACGCCCTGGCGCGCTCTGGCGCAGTAGATGTTATCGTTGTTGACTCCGTAGCGGCACTGACGCCGAAAGCGGAAATCGAAGGTGAAATCGGCGACTCTCACATGGGCCTTGCGGCACGTATGATGAGCCAGGCGATGCGTAAGCTGGCGGGTAACCTGAAGCAGTCCAACACGCTGCTGATCTTCATCAACCAGATCCGTATGAAAATTGGTGTGATGTTCGGTAACCCGGAAACCACTACCGGTGGTAACGCGCTGAAATTCTACGCCTCTGTTCGTCTCGACATCCGTCGTATCGGCGCGGTGAAAGAGGGCGAAAA…
2477	GGGGAAAGGGACTCAGGCTCAGTTCATCATGGAGAAATATGGTATTCCGCAAATCTCCACAGGTGATATGCTGCGTGCTGCGGTCAAATCTGGCTCCGAGCTGGGTAAACAAGCAAAAGACATTATGGACGCTGGCAAACTGGTTACCGATGAACTGGTGATCGCGCTGGTTAAAGAACGTATTGCTCAGGAAGACTGCCGTAACGGTTTCCTGCTTGACGGCTTCCCGCGTACTATTCCGCAGGCTGACGCGATGAAAGAAGCGGGCATCAATGTTGATTACGTTCTGGAGTTCGACGTACCGGACGAACTGATTGTTGATCGTATTGTTGGTCGCCGCGTTCACGCGCCATCTGGTCGTGTTTATCACGTTAAATTTAATCCGCCGAAAGTAGAAGG…	CGAGAGCCATTCGCCAGGCGGCGGATGAAGTGCTGGCAGGGCAACATGATGATGAGTTCCCGCTGGCAATCTGGCAAACGGGATCCGGTACGCAAAGCAATATGAATATGAATGAAGTACTGGCTAATCGGGCCAGCGAATTGCTTGGCGGCGTACGCGGAATGGAACGTAAAGTTCACCCTAACGATGACGTGAACAAAAGCCAAAGCTCCAATGATGTCTTCCCAACTGCTATGCACGTGGCGGCGTTATTGGCACTGCGTAAGCAACTCATTCCTCAGCTCAAAAACCTCACTCAAACTCTGAATGAGAAATCGCGTGCATTTGCCGATATCGTCAAAATTGGTCGTACCCACTTGCAGGACGCCACACCGCTGACCTTGGGACAGGAGATTTCTG…	GGTCTGCACGGCGTTGGTGTTTCGGTAGTAAACGCCCTGTCGCAAAAACTGGAGCTGGTTATTCAGCGCGAGGGTAAAATTCACCGTCAGATCTACGAACACGGTGTTCCGCAGGCACCGCTGGCGGTTACTGGTGACACCGACAAAACCGGCACCATGGTGCGTTTCTGGCCAAGCCTTGAAACTTTCACCAATGTGACCGAGTTCGAATACGATATTCTGGCGAAGCGTCTGCGTGAGCTGTCCTTCCTCAATTCCGGCGTGTCTATTCGTCTGAAAGACAAACGCGACGGCAAAGAAGACCACTTCCACTATGAAGGCGGCATTAAGGCGTTCGTTGAATATCTGAACAAGAACAAAACGCCGATTCACCCGAACATCTTCTACTTCTCCACCGAA…	CGACGCTGCCGTCGAGAAAGCCTATAAAGGCGAGCGTAAAATCTCCTGGATGGAAATTTACACCGGTGAAAAATCCACACAGGTTTATGGTCAGGACGTCTGGCTGCCTGCTGAAACCCTTGATCTGATTCGTGAATATCGCGTTGCTATCAAAGGCCCTCTGACCACTCCGGTTGGCGGCGGTATTCGTTCTCTTAACGTTGCCCTGCGTCAGGAGCTGGATCTTTACATCTGCCTGCGTCCGGTACGTTACTACCAGGGCACCCCAAGCCCGGTTAAACACCCTGAACTGACCGATATGGTTATCTTCCGTGAAAACTCGGAAGACATTTATGCGGGTATCGAATGGAAAGCTGACTCTGCCGACGCTGAGAAAGTGATCAAATTCCTGCGTGAAGA…	GGCGTAGCGCGTAAACCGGGTATGGATCGTTCCGACCTGTTTAACGTTAACGCCGGTATTGTGAAGAATCTGGTTCAGCAAGTTGCGAAAACTTGCCCGAAAGCGTGCATTGGCATTATCACTAACCCGGTTAACACCACTGTGGCTATCGCTGCGGAAGTGCTGAAAAAAGCCGGTGTTTATGACAAAAACAAGCTGTTTGGCGTTACTACGCTGGATATTATTCGTTCCAACACCTTTGTCGCGGAACTGAAAGGTAAACAACCGGGTGATGTAGAAGTGCCGGTTATTGGCGGTCACTCTGGCGTTACTATTCTGCCGCTGCTGTCACAGGTTCCTGGCATCAGTTTTACCGAGCAGGAAGTCGCAGATCTGACCAAACGTATCCAGAACGCGGGC…	ATAACGCGCGTGAGAAAGCGCGTGGCGCGAAAGCGATCGGCACCACGGGGCGTGGTATCGGGCCTGCTTATGAAGATAAAGTGGCACGTCGCGGTCTGCGTGTTGGCGACCTTTTCGACAAAGAAACCTTCGCTGAAAAACTGAAAGAAGTGATGGAATATCACAACTTCCAGTTGGTTAACTACTACAAAGTTGAAGCGGTTGATTACCAGAAAGTTCTGGATGATGTGATGGCCGTTGCCGACATCCTGACTTCCATGGTGGTTGACGTTTCTGACCTGCTTGACCAGGCGCGTCAGCGTGGCGATTTCGTCATGTTTGAAGGTGCGCAGGGTACGCTTCTGGATATCGACCACGGTACTTATCCGTACGTAACCTCTTCCAACACCACTGCGGGTG…	TGCTCGTAAACTGGGCGTCGATATCGACAACCTGCTGTGTTCCCAGCCGGACACTGGCGAACAGGCGCTGGAAATCTGTGACGCCCTGGCGCGCTCTGGCGCAGTAGATGTTATCGTTGTTGACTCCGTAGCGGCACTGACGCCGAAAGCGGAAATCGAAGGTGAAATCGGCGACTCTCACATGGGCCTTGCGGCACGTATGATGAGCCAGGCGATGCGTAAGCTGGCGGGTAACCTGAAGCAGTCCAACACGCTGCTGATCTTCATCAACCAGATCCGTATGAAAATTGGTGTGATGTTCGGTAACCCGGAAACCACTACCGGTGGTAACGCGCTGAAATTCTACGCCTCTGTTCGTCTCGACATCCGTCGTATCGGCGCGGTGAAAGAGGGCGAAAA…
2478	GGGGAAAGGGACTCAGGCTCAGTTCATCATGGAGAAATATGGTATTCCGCAAATCTCCACAGGTGATATGCTGCGTGCTGCGGTCAAATCTGGCTCCGAGCTGGGTAAACAAGCAAAAGACATTATGGACGCTGGCAAACTGGTTACCGATGAACTGGTGATCGCGCTGGTTAAAGAACGTATTGCTCAGGAAGACTGCCGTAACGGTTTCCTGCTTGACGGCTTCCCGCGTACTATTCCGCAGGCTGACGCGATGAAAGAAGCGGGCATCAATGTTGATTACGTTCTGGAGTTCGACGTACCGGACGAACTGATTGTTGATCGTATTGTTGGTCGCCGCGTTCACGCGCCATCTGGCCGTGTTTATCACGTTAAATTCAATCCGCCGAAAGTAGAAGG…	CGAGAGCTATTCGCCAGGCGGCGGATGAAGTGCTGGCAGGGCAACATGATGATGAGTTCCCGCTGGCAATCTGGCAAACGGGATCTGGTACGCAAAGCAATATGAATATGAATGAAGTACTGGCTAACCGGGCCAGCGAATTGCTTGGCGGCGTACGCGGAATGGAACGTAAAGTTCACCCTAACGATGACGTGAACAAAAGCCAAAGCTCCAATGATGTCTTCCCAACTGCTATGCACGTGGCGGCGTTATTGGCACTGCGTAAGCAACTCATTCCTCAGCTCAAAAACCTCACTCAAACTCTGAATGAGAAATCGCGCGCATTTGCCGATATCGTCAAAATTGGTCGTACCCACTTGCAGGACGCCACACCGCTGACTCTGGGACAGGAGATTTCTG…	GGTCTGCACGGCGTTGGTGTTTCGGTAGTAAACGCCCTGTCGCAAAAACTGGAGCTGGTTATTCAGCGCGAGGGTAAAATTCACCGTCAGATCTACGAACACGGTGTTCCGCAGGAACCGCTGGCGGTTACTGGTGACACCGACAAAACCGGCACCATGGTGCGTTTCTGGCCAAGCCTTGAAACTTTCACCAATGTGACCGAGTTCGAATACGATATTCTGGCGAAGCGTCTGCGTGAGCTGTCCTTCCTCAATTCCGGCGTGTCTATTCGTCTGAAAGACAAACGCGACGGCAAAGAAGACCACTTCCACTATGAAGGCGGCATTAAGGCGTTCGTTGAATATCTGAACAAGAACAAAACGCCGATTCACCCGAACATCTTCTACTTCTCCACCGAA…	CGACGCTGCCGTCGAGAAAGCCTATAAAGGCGAGCGTAAAATCTCCTGGATGGAAATTTACACCGGTGAAAAATCCACACAGGTTTATGGTCAGGACGTCTGGTTGCCTGCTGAAACCCTTGATCTGATTCGTGAATATCGCGTTGCTATCAAAGGCCCTCTGACCACTCCGGTTGGCGGCGGTATTCGTTCTCTTAACGTTGCCCTGCGCCAGGAGCTGGATCTTTACATCTGCCTGCGTCCGGTACGTTACTACCAGGGCACCCCAAGCCCGGTTAAACACCCTGAACTGACCGATATGGTTATCTTCCGTGAAAACTCGGAAGACATTTATGCGGGTATCGAATGGAAAGCTGACTCTGCCGACGCTGAGAAAGTGATCAAATTCCTGCGTGAAGA…	GGTGTAGCGCGTAAACCGGGTATGGATCGTTCCGACCTGTTTAACGTTAACGCCGGTATTGTGAAGAATCTGGTTCAGCAAGTTGCGAAAACTTGCCCGAAAGCGTGCATTGGCATTATCACTAACCCGGTTAACACCACTGTGGCTATCGCTGCGGAAGTGCTGAAAAAAGCCGGTGTTTATGACAAAAACAAGCTGTTTGGCGTTACTACGCTGGATATTATTCGTTCCAACACCTTTGTCGCGGAACTGAAAGGTAAACAACCGGGTGATGTAGAAGTGCCGGTTATTGGCGGTCACTCTGGCGTTACTATTCTGCCGCTGCTGTCACAGGTTCCTGGCGTCAGTTTTACCGAGCAGGAAGTCGCAGATCTGACCAAACGTATCCAGAACGCGGGT…	ATAACGCGCGTGAGAAAGCGCGTGGCGCGAAAGCGATCGGCACCACGGGGCGTGGTATCGGGCCTGCTTATGAAGATAAAGTGGCACGTCGCGGTCTGCGTGTTGGCGACCTTTTCGACAAAGAAACCTTCGCTGAAAAACTGAAAGAAGTGATGGAATATCACAACTTCCAGTTGGTTAACTACTACAAAGTTGAAGCGGTTGATTACCAGAAAGTTCTGGATGATGTGATGGCCGTTGCCGACATCCTGACTTCCATGGTGGTTGACGTTTCTGACCTGCTCGATCAGGCGCGTCAGCGTGGCGATTTCGTCATGTTTGAAGGTGCGCAGGGTACGCTTCTGGATATCGACCACGGTACTTATCCGTACGTAACCTCTTCCAACACCACTGCGGGCG…	TGCTCGTAAACTGGGCGTCGATATCGACAACCTGCTGTGTTCCCAGCCGGACACTGGCGAACAGGCGCTGGAAATCTGTGACGCCCTGGCGCGCTCTGGCGCAGTAGATGTTATCGTTGTTGACTCCGTAGCGGCACTGACGCCGAAAGCGGAAATCGAAGGTGAAATCGGCGACTCTCACATGGGCCTTGCGGCACGTATGATGAGCCAGGCGATGCGTAAGCTGGCGGGTAACCTGAAGCAGTCCAACACGCTGCTGATCTTCATCAACCAGATCCGTATGAAAATTGGTGTGATGTTCGGTAACCCGGAAACCACTACCGGTGGTAACGCGCTGAAATTCTACGCCTCTGTTCGTCTCGACATCCGTCGTATCGGCGCGGTGAAAGAGGGCGAAAA…
2485	GGGGAAAGGGACTCAGGCTCAGTTCATCATGGAGAAATATGGTATTCCGCAAATCTCCACAGGTGATATGCTGCGTGCTGCGGTCAAATCTGGCTCCGAGCTGGGTAAACAAGCAAAAGACATTATGGACGCTGGCAAACTGGTTACCGATGAACTGGTGATCGCGCTGGTTAAAGAACGTATTGCTCAGGAAGACTGCCGTAACGGTTTCCTGCTTGACGGCTTCCCGCGTACTATTCCGCAGGCTGACGCGATGAAAGAAGCGGGCATCAATGTTGATTACGTTCTGGAGTTCGACGTACCGGACGAACTGATTGTTGATCGTATTGTTGGTCGCCGCGTTCACGCGCCATCTGGCCGTGTTTATCACGTTAAATTCAATCCGCCGAAAGTAGAAGG…	CGAGAGCTATTCGCCAGGCGGCGGATGAAGTGCTGGCAGGGCAACATGATGATGAGTTCCCGCTGGCAATCTGGCAAACGGGATCTGGTACGCAAAGCAATATGAATATGAATGAAGTACTGGCTAACCGGGCCAGCGAATTGCTTGGCGGCGTACGCGGAATGGAACGTAAAGTTCACCCTAACGATGACGTGAACAAAAGCCAAAGCTCCAATGATGTCTTCCCAACTGCTATGCACGTGGCGGCGTTATTGGCACTGCGTAAGCAACTCATTCCTCAGCTCAAAAACCTCACTCAAACTCTGAATGAGAAATCGCGCGCATTTGCCGATATCGTCAAAATTGGTCGTACCCACTTGCAGGACGCCACACCGCTGACTCTGGGACAGGAGATTTCTG…	GGTCTGCACGGCGTTGGTGTTTCGGTAGTAAACGCCCTGTCGCAAAAACTGGAGCTGGTTATTCAGCGCGAGGGTAAAATTCACCGTCAGATCTACGAACACGGTGTTCCGCAGGCACCGCTGGCGGTTACTGGTGACACCGACAAAACCGGCACCATGGTGCGTTTCTGGCCAAGCCTTGAAACTTTCACCAATGTGACCGAGTTCGAATACGATATTCTGGCGAAGCGTCTGCGTGAGCTGTCCTTCCTCAATTCCGGCGTGTCTATTCGTCTGAAAGACAAACGCGACGGCAAAGAAGACCACTTCCACTATGAAGGCGGCATTAAGGCGTTCGTTGAATATCTGAATAAGAACAAAACGCCGATTCACCCGAACATCTTCTACTTCTCCACCGAA…	CGACGCTGCCGTCGAGAAAGCCTATAAAGGCGAGCGTAAAATCTCCTGGATGGAAATTTACACCGGTGAAAAATCCACACAGGTTTATGGTCAGGACGTCTGGTTGCCTGCTGAAACCCTTGATCTGATTCGTGAATATCGCGTTGCTATCAAAGGCCCTCTGACCACTCCGGTTGGCGGCGGTATTCGTTCTCTTAACGTTGCCCTGCGCCAGGAGCTGGATCTTTACATCTGCCTGCGTCCGGTACGTTACTACCAGGGCACCCCAAGCCCGGTTAAACACCCTGAACTGACCGATATGGTTATCTTCCGTGAAAACTCGGAAGACATTTATGCGGGTATCGAATGGAAAGCTGACTCTGCCGACGCTGAGAAAGTGATCAAATTCCTGCGTGAAGA…	GGTGTAGCGCGTAAACCGGGTATGGATCGTTCCGACCTGTTTAACGTTAACGCCGGTATTGTGAAGAATCTGGTTCAGCAAGTTGCGAAAACTTGCCCGAAAGCGTGCATTGGCATTATCACTAACCCGGTTAACACCACTGTGGCTATCGCTGCGGAAGTGCTGAAAAAAGCCGGTGTTTATGACAAAAACAAGCTGTTTGGCGTTACTACGCTGGATATTATTCGTTCCAACACCTTTGTCGCGGAACTGAAAGGTAAACAACCGGGTGATGTAGAAGTGCCGGTTATTGGCGGTCACTCTGGCGTTACTATTCTGCCGCTGCTGTCACAGGTTCCTGGCGTCAGTTTTACCGAGCAGGAAGTCGCAGATCTGACCAAACGTATCCAGAACGCGGGT…	ATAACGCGCGTGAGAAAGCGCGTGGCGCGAAAGCGATCGGCACCACGGGGCGTGGTATCGGGCCTGCTTATGAAGATAAAGTGGCACGTCGCGGTCTGCGTGTTGGCGACCTTTTCGACAAAGAAACCTTCGCTGAAAAACTGAAAGAAGTGATGGAATATCACAACTTCCAGTTGGTTAACTACTACAAAGTTGAAGCGGTTGATTACCAGAAAGTTCTGGATGATGTGATGGCCGTTGCCGACATCCTGACTTCCATGGTGGTTGACGTTTCTGACCTGCTCGATCAGGCGCGTCAGCGTGGCGATTTTGTCATGTTTGAAGGTGCGCAGGGTACGCTTCTGGATATCGACCACGGTACTTATCCGTACGTAACCTCTTCCAACACCACTGCGGGTG…	TGCTCGTAAACTGGGCGTCGATATCGACAACCTGCTGTGTTCCCAGCCGGACACTGGCGAACAGGCGCTGGAAATCTGTGACGCCCTGGCGCGCTCTGGCGCAGTAGATGTTATCGTTGTTGACTCCGTAGCGGCACTGACGCCGAAAGCGGAAATCGAAGGTGAAATCGGCGACTCTCACATGGGCCTTGCGGCACGTATGATGAGCCAGGCGATGCGTAAGCTGGCGGGTAACCTGAAGCAGTCCAACACGCTGCTGATCTTCATCAACCAGATCCGTATGAAAATTGGTGTGATGTTCGGTAACCCGGAAACCACTACCGGTGGTAACGCGCTGAAATTCTACGCCTCTGTTCGTCTCGACATCCGTCGTATCGGCGCGGTGAAAGAGGGCGAAAA…
2494	GGGGAAAGGGACTCAGGCTCAGTTCATCATGGAGAAATATGGTATTCCGCAAATCTCCACAGGTGATATGCTGCGTGCTGCGGTCAAATCTGGCTCCGAGCTGGGTAAACAAGCAAAAGACATTATGGACGCTGGCAAACTGGTTACCGATGAACTGGTGATCGCGCTGGTTAAAGAACGTATTGCTCAGGAAGACTGCCGTAACGGTTTCCTGCTTGACGGCTTCCCGCGTACTATTCCGCAGGCTGACGCGATGAAAGAAGCGGGCATCAATGTTGATTACGTTCTGGAGTTCGACGTACCGGACGAACTGATTGTTGATCGTATTGTTGGTCGCCGCGTTCACGCGCCATCTGGCCGTGTTTATCACGTTAAATTCAATCCGCCGAAAGTAGAAGG…	CGAGAGCCATTCGCCAGGCGGCGGATGAAGTGCTGGCAGGGCAACATGATGATGAGTTCCCGCTGGCAATCTGGCAAACGGGATCCGGTACGCAAAGCAATATGAATATGAATGAAGTACTGGCTAATCGGGCCAGCGAATTGCTTGGCGGCGTACGCGGAATGGAACGTAAAGTTCACCCTAACGATGACGTGAACAAAAGCCAAAGCTCCAATGATGTCTTCCCAACTGCTATGCACGTGGCGGCGTTATTGGCACTGCGTAAGCAACTCATTCCTCAGCTCAAAAACCTCACTCAAACTCTGAATGAGAAATCGCGCGCATTTGCCGATATCGTCAAAATTGGTCGTACCCACTTGCAGGACGCCACACCGCTGACCCTGGGACAGGAGATTTCTG…	GGTCTGCACGGCGTTGGTGTTTCGGTAGTAAACGCCCTGTCGCAAAAACTGGAGCTGGTTATTCAGCGCGAGGGTAAAATTCACCGTCAGATCTACGAACACGGTGTTCCGCAGGCACCGCTGGCGGTTACTGGTGACACCGACAAAACCGGCACCATGGTGCGTTTCTGGCCAAGCCTTGAAACTTTCACCAATGTGACCGAGTTCGAATACGATATTCTGGCGAAGCGTCTGCGTGAGCTGTCCTTCCTCAATTCCGGCGTGTCTATTCGTCTGAAAGACAAACGCGACGGCAAAGAAGACCACTTCCACTATGAAGGCGGCATTAAGGCGTTCGTTGAATATCTGAACAAGAACAAAACGCCGATTCACCCGAACATCTTCTACTTCTCCACCGAA…	CGATGCTGCCGTCGAGAAAGCCTATAAAGGTGAGCGTAAAATCTCCTGGATGGAAATTTACACCGGTGAAAAATCCACACAGGTTTATGGTCAGGACGTCTGGCTGCCTGCTGAAACCCTTGATCTGATTCGTGAATATCGCGTTGCTATCAAAGGCCCTCTGACCACTCCGGTTGGCGGCGGTATTCGTTCTCTTAACGTTGCCCTGCGTCAGGAGCTGGATCTTTACATCTGCCTGCGTCCGGTACGTTACTACCAGGGCACCCCAAGCCCGGTTAAACACCCTGAACTGACCGATATGGTTATCTTCCGTGAAAACTCGGAAGACATTTATGCGGGTATCGAATGGAAAGCTGACTCTGCCGACGCAGAGAAAGTGATCAAATTCCTGCGTGAAGA…	GGTGTAGCGCGTAAACCGGGTATGGATCGTTCCGACCTGTTTAACGTTAACGCCGGTATTGTAAAGAATCTGGTTCAGCAAGTTGCGAAAACTTGCCCGAAAGCGTGCATTGGCATTATCACTAACCCGGTTAACACCACTGTGGCTATCGCTGCGGAAGTGCTGAAAAAAGCCGGTGTTTATGACAAAAACAAGCTGTTTGGCGTTACTACGCTGGATATTATTCGTTCCAACACCTTTGTCGCGGAACTGAAAGGTAAACAACCGGGTGATGTAGAAGTGCCGGTTATTGGCGGTCACTCTGGCGTTACTATTCTGCCGCTGCTGTCACAGGTTCCTGGCATCAGTTTTACCGAGCAGGAAGTCGCAGATCTGACCAAACGTATCCAGAACGCGGGC…	ATAACGCGCGTGAGAAAGCGCGTGGCGCGAAAGCGATCGGCACCACGGGGCGTGGTATCGGGCCTGCTTATGAAGATAAAGTGGCACGTCGCGGTCTGCGTGTTGGCGACCTTTTCGACAAAGAAACCTTCGCTGAAAAACTGAAAGAAGTGATGGAATATCACAACTTCCAGTTGGTTAACTACTACAAAGTTGAAGCGGTTGATTACCAGAAAGTTCTGGATGATGTGATGGCCGTTGCCGACATCCTGACTTCCATGGTGGTTGACGTTTCTGACCTGCTTGACCAGGCGCGTCAGCGTGGCGATTTCGTCATGTTTGAAGGTGCGCAGGGTACGCTTCTGGATATCGACCACGGTACTTATCCGTACGTAACCTCTTCCAACACCACTGCGGGCG…	TGCTCGTAAACTGGGCGTCGATATCGACAACCTGCTGTGTTCCCAGCCGGACACTGGCGAACAGGCGCTGGAAATCTGTGACGCCCTGGCGCGCTCTGGCGCAGTAGATGTTATCGTTGTTGACTCCGTAGCGGCACTGACGCCGAAAGCGGAAATCGAAGGTGAAATCGGCGACTCTCACATGGGCCTTGCGGCACGTATGATGAGCCAGGCGATGCGTAAGCTGGCGGGTAACCTGAAGCAGTCCAACACGCTGCTGATCTTCATCAACCAGATCCGTATGAAAATTGGTGTGATGTTCGGTAACCCGGAAACCACTACCGGTGGTAACGCGCTGAAATTCTACGCCTCTGTTCGTCTCGACATCCGTCGTATCGGCGCGGTGAAAGAGGGCGAAAA…
2499	GGGGAAAGGGACTCAGGCTCAGTTCATCATGGAGAAATATGGTATTCCGCAAATCTCCACAGGTGATATGCTGCGTGCTGCGGTCAAATCTGGCTCCGAGCTGGGTAAACAAGCAAAAGACATTATGGACGCTGGCAAACTGGTTACCGATGAACTGGTGATCGCGCTGGTTAAAGAACGTATTGCTCAGGAAGACTGCCGTAACGGTTTCCTGCTTGACGGCTTCCCGCGTACTATTCCGCAGGCTGACGCGATGAAAGAAGCGGGCATCAATGTTGATTACGTTCTGGAGTTCGACGTACCGGACGAACTGATTGTTGATCGTATTGTTGGTCGCCGCGTTCACGCGCCATCTGGCCGTGTTTATCACGTTAAATTCAATCCGCCGAAAGTAGAAGG…	CGAGAGCCATTCGCCAGGCGGCGGATGAAGTGCTGGCAGGGCAACATGATGATGAGTTCCCGCTGGCAATCTGGCAAACGGGATCCGGTACGCAAAGCAATATGAATATGAATGAAGTACTGGCTAATCGGGCCAGCGAATTGCTTGGCGGCGTACGCGGAATGGAACGTAAAGTTCACCCTAACGATGACGTGAACAAAAGCCAAAGCTCCAATGATGTCTTCCCAACTGCTATGCACGTGGCGGCGTTATTGGCACTGCGTAAGCAACTCATTCCTCAGCTCAAAAACCTCACTCAAACTCTGAATGAGAAATCGCGCGCATTTGCCGATATCGTCAAAATTGGTCGTACCCACTTGCAGGACGCCACACCGCTGACCCTGGGACAGGAGATTTCTG…	GGTCTGCACGGCGTTGGTGTTTCGGTAGTAAACGCCCTGTCGCAAAAACTGGAGCTGGTTATTCAGCGCGAGGGTAAAATTCACCGTCAGATCTACGAACACGGTGTTCCGCAGGCACCGCTGGCGGTTACTGGTGACACCGACAAAACCGGCACCATGGTGCGTTTCTGGCCAAGCCTTGAAACTTTCACCAATGTGACCGAGTTCGAATACGATATTCTGGCGAAGCGTCTGCGTGAGCTGTCCTTCCTCAATTCCGGCGTGTCTATTCGTCTGAAAGACAAACGCGACGGCAAAGAAGACCACTTCCACTATGAAGGCGGCATTAAGGCGTTCGTTGAATATCTGAACAAGAACAAAACGCCGATTCACCCGAACATCTTCTACTTCTCCACCGAA…	CGATGCTGCCGTCGAGAAAGCCTATAAAGGTGAGCGTAAAATCTCCTGGATGGAAATTTACACCGGTGAAAAATCCACACAGGTTTATGGTCAGGACGTCTGGCTGCCTGCTGAAACCCTTGATCTGATTCGTGAATATCGCGTTGCTATCAAAGGCCCTCTGACCACTCCGGTTGGCGGCGGTATTCGTTCTCTTAACGTTGCCCTGCGTCAGGAGCTGGATCTTTACATCTGCCTGCGTCCGGTACGTTACTACCAGGGCACCCCAAGCCCGGTTAAACACCCTGAACTGACCGATATGGTTATCTTCCGTGAAAACTCGGAAGACATTTATGCGGGTATCGAATGGAAAGCTGACTCTGCCGACGCAGAGAAAGTGATCAAATTCCTGCGTGAAGA…	GGTGTAGCGCGTAAACCGGGTATGGATCGTTCCGACCTGTTTAACGTTAACGCCGGTATTGTAAAGAATCTGGTTCAGCAAGTTGCGAAAACTTGCCCGAAAGCGTGCATTGGCATTATCACTAACCCGGTTAACACCACTGTGGCTATCGCTGCGGAAGTGCTGAAAAAAGCCGGTGTTTATGACAAAAACAAGCTGTTTGGCGTTACTACGCTGGATATTATTCGTTCCAACACCTTTGTCGCGGAACTGAAAGGTAAACAACCGGGTGATGTAGAAGTGCCGGTTATTGGCGGTCACTCTGGCGTTACTATTCTGCCGCTGCTGTCACAGGTTCCTGGCATCAGTTTTACCGAGCAGGAAGTCGCAGATCTGACCAAACGTATCCAGAACGCGGGC…	ATAACGCGCGTGAGAAAGCGCGTGGCGCGAAAGCGATCGGCACCACGGGGCGTGGTATCGGGCCTGCTTATGAAGATAAAGTGGCACGTCGCGGTCTGCGTGTTGGCGACCTTTTCGACAAAGAAACCTTCGCTGAAAAACTGAAAGAAGTGATGGAATATCACAACTTCCAGTTGGTTAACTACTACAAAGTTGAAGCGGTTGATTACCAGAAAGTTCTGGATGATGTGATGGCCGTTGCCGACATCCTGACTTCCATGGTGGTTGACGTTTCTGACCTGCTTGACCAGGCGCGTCAGCGTGGCGATTTCGTCATGTTTGAAGGTGCGCAGGGTACGCTTCTGGATATCGACCACGGTACTTATCCGTACGTAACCTCTTCCAACACCACTGCGGGCG…	TGCTCGTAAACTGGGCGTCGATATCGACAACCTGCTGTGTTCCCAGCCGGACACTGGCGAACAGGCGCTGGAAATCTGTGACGCCCTGGCGCGCTCTGGCGCAGTAGATGTTATCGTTGTTGACTCCGTAGCGGCACTGACGCCGAAAGCGGAAATCGAAGGTGAAATCGGCGACTCTCACATGGGCCTTGCGGCACGTATGATGAGCCAGGCGATGCGTAAGCTGGCGGGTAACCTGAAGCAGTCCAACACGCTGCTGATCTTCATCAACCAGATCCGTATGAAAATTGGTGTGATGTTCGGTAACCCGGAAACCACTACCGGTGGTAACGCGCTGAAATTCTACGCCTCTGTTCGTCTCGACATCCGTCGTATCGGCGCGGTGAAAGAGGGCGAAAA…
2505	GGGGAAAGGGACTCAGGCTCAGTTCATCATGGAGAAATATGGTATTCCGCAAATCTCCACAGGTGATATGCTGCGTGCCGCAGTCAAATCTGGCTCCGAGCTGGGTAAACAAGCAAAAGACATTATGGACGCTGGCAAACTGGTTACCGATGAACTGGTGATCGCGCTGGTTAAAGAACGTATTGCTCAGGAAGACTGCCGTAACGGTTTCCTGCTTGACGGCTTCCCGCGTACTATTCCGCAGGCTGACGCGATGAAAGAAGCGGGCATCAATGTTGATTACGTTCTGGAGTTCGACGTACCGGACGAACTGATTGTTGATCGTATTGTTGGTCGCCGCGTTCACGCGCCATCTGGCCGTGTTTATCACGTTAAATTCAATCCGCCGAAAGTAGAAGG…	CGAGAGCCATTCGCCAGGCGGCGGATGAAGTGCTGGCAGGACAACATGATGATGAGTTCCCGCTGGCAATCTGGCAAACGGGATCCGGTACGCAAAGCAATATGAATATGAATGAAGTACTGGCTAACCGGGCCAGCGAATTGCTTGGCGGCGTACGCGGAATGGAACGTAAAGTTCACCCTAACGATGACGTGAACAAAAGCCAAAGCTCCAATGATGTCTTCCCAACTGCTATGCACGTGGCGGCGTTATTGGCACTGCGTAAGCAACTCATTCCTCAGCTCAAAAACCTCACTCAAACTCTGAATGAGAAATCGCGCGCATTTGCCGATATCGTCAAAATTGGTCGTACCCACTTGCAGGACGCCACACCGCTGACTCTGGGACAGGAGATTTCTG…	GGTCTGCACGGCGTTGGTGTTTCGGTAGTAAACGCCCTGTCGCAAAAACTGGAGCTGGTTATTCAGCGCGAGGGTAAAATTCACCGTCAGATCTACGAACACGGTGTTCCGCAGGCACCGCTGGCGGTTACTGGTGACACCGACAAAACCGGCACCATGGTGCGTTTCTGGCCAAGCCTTGAAACTTTCACCAATGTGACCGAGTTCGAATACGATATTCTGGCGAAGCGTCTGCGTGAGCTGTCCTTCCTCAATTCCGGCGTGTCTATTCGTCTGAAAGACAAACGCGACGGCAAAGAAGACCACTTCCACTATGAAGGCGGCATTAAGGCGTTCGTTGAATATCTGAACAAGAACAAAACGCCGATTCACCCGAACATCTTCTACTTCTCCACCGAA…	CGATGCTGCCGTCGAGAAAGCCTATAAAGGTGAGCGTAAAATCTCCTGGATGGAAATTTACACCGGTGAAAAATCCACACAGGTTTATGGTCAGGACGTCTGGCTGCCTGCTGAAACCCTTGATCTGATTCGTGAATATCGCGTTGCTATCAAAGGCCCTCTGACCACTCCGGTTGGCGGCGGTATTCGTTCTCTTAACGTTGCCCTGCGTCAGGAGCTGGATCTTTACATCTGCCTGCGTCCGGTACGTTACTACCAGGGCACCCCAAGCCCGGTTAAACACCCTGAACTGACCGATATGGTTATCTTCCGTGAAAACTCGGAAGACATTTATGCGGGTATCGAATGGAAAGCTGACTCTGCCGACGCTGAGAAAGTGATCAAATTCCTGCGTGAAGA…	GGTGTAGCGCGTAAACCGGGTATGGATCGTTCCGACCTGTTTAACGTTAACGCCGGTATTGTGAAGAATCTGGTTCAGCAAGTTGCGAAAACTTGCCCGAAAGCGTGCATTGGCATTATCACTAACCCGGTTAACACCACTGTGGCTATCGCTGCGGAAGTGCTGAAAAAAGCCGGTGTTTATGACAAAAACAAGCTGTTTGGCGTTACTACGCTGGATATTATTCGTTCCAACACCTTTGTCGCGGAACTGAAAGGTAAACAACCGGGTGATGTAGAAGTGCCGGTTATTGGCGGTCACTCTGGCGTTACTATTCTGCCGCTGCTGTCACAGGTTCCTGGCGTCAGTTTTACCGAGCAGGAAGTCGCAGATCTGACCAAACGTATCCAGAACGCGGGC…	ATAACGCGCGTGAGAAAGCGCGTGGCGCGAAAGCGATCGGCACCACGGGGCGTGGTATCGGGCCTGCTTATGAAGATAAAGTGGCACGTCGCGGTCTGCGTGTTGGCGACCTTTTCGACAAAGAAACCTTCGCTGAAAAACTGAAAGAAGTGATGGAATATCACAACTTCCAGTTGGTTAACTACTACAAAGTTGAAGCGGTTGATTACCAGAAAGTTCTGGATGATGTGATGGCCGTTGCCGACATCCTGACTTCCATGGTGGTTGACGTTTCTGACCTGCTTGACCAGGCGCGTCAGCGTGGCGATTTCGTCATGTTTGAAGGTGCGCAGGGTACGCTTCTGGATATCGACCACGGTACTTATCCGTACGTAACCTCTTCCAACACCACTGCGGGTG…	TGCTCGTAAACTGGGCGTCGATATTGACAACCTGCTGTGTTCCCAGCCGGACACTGGCGAACAGGCGCTGGAAATCTGTGACGCCCTGGCGCGCTCTGGCGCAGTAGACGTTATCGTTGTTGACTCCGTAGCGGCACTGACGCCGAAAGCGGAAATCGAAGGTGAAATCGGCGACTCTCACATGGGCCTTGCGGCACGTATGATGAGCCAGGCGATGCGTAAGCTGGCGGGTAACCTGAAGCAGTCCAACACGCTGCTGATCTTCATCAACCAGATCCGTATGAAAATTGGTGTGATGTTCGGTAACCCGGAAACCACTACCGGTGGTAACGCGCTGAAATTCTACGCCTCTGTTCGTCTCGACATCCGTCGTATCGGCGCGGTGAAAGAGGGCGAAAA…
2660	GGGGAAAGGGACTCAGGCTCAGTTCATCATGGAGAAATATGGTATTCCGCAAATCTCCACAGGTGATATGCTGCGTGCCGCAGTCAAATCTGGCTCCGAGCTGGGTAAACAAGCAAAAGACATTATGGACGCTGGCAAACTGGTTACCGATGAACTGGTGATCGCACTGGTTAAAGAACGTATTGCTCAGGAAGACTGCCGTAACGGTTTCCTGCTTGACGGCTTCCCGCGTACTATTCCGCAGGCTGACGCGATGAAAGAAGCGGGCATCAATGTTGATTACGTTCTGGAGTTCGACGTACCGGACGAACTGATTGTTGATCGTATTGTTGGTCGCCGCGTTCACGCGCCATCTGGCCGTGTTTATCACGTTAAATTCAATCCGCCGAAAGTAGAAGG…	CGAGAGCCATTCGCCAGGCGGCGGATGAAGTGCTGGCAGGGCAACATGATGATGAGTTCCCGCTGGCAATCTGGCAAACGGGATCTGGTACGCAAAGCAATATGAATATGAATGAAGTACTGGCTAACCGGGCCAGCGAATTGCTTGGCGGCGTACGCGGAATGGAACGTAAAGTTCACCCTAACGATGACGTGAACAAAAGCCAAAGCTCCAATGATGTCTTCCCAACTGCTATGCACGTGGCGGCGTTATTGGCACTGCGTAAGCAACTCATTCCTCAGCTCAAAAACCTCACTCAAACTCTGAATGAGAAATCGCGCGCATTTGCCGATATCGTCAAAATTGGTCGTACCCACTTGCAGGACGCCACACCGCTGACCCTGGGACAGGAGATTTCTG…	GGTCTGCACGGCGTTGGTGTTTCGGTAGTAAACGCCCTGTCGCAAAAACTGGAGCTGGTTATTCAGCGCGAGGGTAAAATTCACCGTCAGATCTACGAACACGGTGTTCCGCAGGCACCGCTGGCGGTTACTGGTGACACCGACAAAACCGGCACCATGGTGCGTTTCTGGCCAAGCCTTGAAACTTTCACCAATGTGACCGAGTTCGAATACGATATTCTGGCGAAGCGTCTGCGTGAGCTGTCCTTCCTCAATTCCGGCGTGTCTATTCGTCTGAAAGACAAACGCGACGGCAAAGAAGACCACTTCCACTATGAAGGCGGCATTAAGGCGTTCGTTGAATATCTGAACAAGAACAAAACGCCGATTCACCCGAACATCTTCTACTTCTCCACCGAA…	CGATGCTGCCGTCGAGAAAGCCTATAAAGGTGAGCGTAAAATCTCCTGGATGGAAATTTACACCGGTGAAAAATCCACACAGGTTTATGGTCAGGACGTCTGGCTGCCTGCTGAAACCCTTGATCTGATTCGTGAATATCGCGTTGCTATCAAAGGCCCTCTGACCACTCCGGTTGGCGGCGGTATTCGTTCTCTTAACGTTGCCCTGCGTCAGGAGCTGGATCTTTACATCTGCCTGCGTCCGGTACGTTACTACCAGGGCACCCCAAGCCCGGTTAAACACCCTGAACTGACCGATATGGTTATCTTCCGTGAAAACTCGGAAGACATTTATGCGGGTATCGAATGGAAAGCTGACTCTGCCGACGCTGAGAAAGTGATCAAATTCCTGCGTGAAGA…	GGTGTAGCGCGTAAACCGGGTATGGATCGTTCCGACCTGTTTAACGTTAACGCCGGTATTGTAAAGAATCTGGTTCAGCAAGTTGCGAAAACTTGCCCGAAAGCGTGCATTGGCATTATCACTAACCCGGTTAACACCACTGTGGCTATCGCTGCGGAAGTGCTGAAAAAAGCCGGTGTTTATGACAAAAACAAGCTGTTTGGCGTTACTACGCTGGATATTATTCGTTCCAACACCTTTGTCGCGGAACTGAAAGGTAAACAACCGGGTGATGTAGAAGTGCCTGTTATTGGCGGTCACTCTGGCGTTACTATTCTGCCGCTGCTGTCACAGGTTCCTGGCGTCAGTTTTACCGAGCAGGAAGTCGCAGATCTGACCAAACGTATCCAGAACGCGGGC…	ATAACGCGCGTGAGAAAGCGCGCGGCGCGAAAGCGATCGGCACCACGGGGCGTGGTATCGGGCCTGCTTATGAAGATAAAGTGGCACGTCGCGGTCTGCGTGTTGGCGACCTTTTCGACAAAGAAACCTTCGCTGAAAAACTGAAAGAAGTGATGGAATATCACAACTTCCAGTTGGTTAACTACTACAAAGTTGAAGCGGTTGATTACCAGAAAGTTCTGGATGATGTGATGGCCGTTGCCGACATCCTGACTTCCATGGTGGTTGACGTTTCTGACCTGCTTGACCAGGCGCGTCAGCGTGGCGATTTCGTCATGTTTGAAGGTGCGCAGGGTACGCTGCTGGATATCGACCACGGTACTTATCCGTACGTAACCTCTTCCAACACCACTGCGGGCG…	TGCTCGTAAACTGGGCGTCGATATCGACAACCTGCTGTGTTCCCAGCCGGACACTGGCGAACAGGCGCTGGAAATCTGTGACGCCCTGGCGCGCTCTGGCGCAGTAGACGTTATCGTTGTTGACTCCGTAGCGGCACTGACGCCGAAAGCGGAAATCGAAGGTGAAATCGGCGACTCTCACATGGGTCTTGCGGCACGTATGATGAGCCAGGCGATGCGTAAGCTGGCGGGTAACCTGAAGCAGTCCAACACGCTGCTGATCTTCATCAACCAGATCCGTATGAAAATTGGTGTGATGTTCGGTAACCCGGAAACCACTACCGGTGGTAACGCGCTGAAATTCTACGCCTCTGTTCGTCTCGACATCCGTCGTATCGGCGCGGTGAAAGAGGGCGAAAA…
2664	GGGGAAAGGGACTCAGGCTCAGTTCATCATGGAGAAATATGGTATTCCGCAAATCTCCACAGGTGATATGCTGCGTGCTGCGGTCAAATCTGGCTCCGAGCTGGGTAAACAAGCAAAAGACATTATGGACGCTGGCAAACTGGTTACCGATGAACTGGTGATCGCGCTGGTTAAAGAACGTATTGCTCAGGAAGACTGCCGTAACGGTTTCCTGCTTGACGGCTTCCCGCGTACTATTCCGCAGGCTGACGCGATGAAAGAAGCGGGCATCAATGTTGATTACGTTCTGGAGTTCGACGTACCGGACGAACTGATTGTTGATCGTATTGTTGGTCGCCGCGTTCACGCGCCATCTGGCCGTGTTTATCACGTTAAATTCAATCCGCCGAAAGTAGAAGG…	CGAGAGCCATTCGCCAGGCGGCGGATGAAGTGCTGGCAGGGCAACATGATGATGAGTTCCCGCTGGCAATCTGGCAAACGGGATCCGGTACGCAAAGCAATATGAATATGAATGAAGTACTGGCTAATCGGGCCAGCGAATTGCTTGGCGGCGTACGCGGAATGGAACGTAAAGTTCACCCTAACGATGACGTGAACAAAAGCCAAAGCTCCAATGATGTCTTCCCAACTGCTATGCACGTGGCGGCGTTATTGGCACTGCGTAAGCAACTCATTCCTCAGCTCAAAAACCTCACTCAAACTCTGAATGAGAAATCGCGCGCATTTGCCGATATCGTCAAAATTGGTCGTACCCACTTGCAGGACGCCACACCGCTGACCCTGGGACAGGAGATTTCTG…	GGTCTGCACGGCGTTGGTGTTTCGGTAGTAAACGCCCTGTCGCAAAAACTGGAGCTGGTTATTCAGCGCGAGGGTAAAATTCACCGTCAGATCTACGAACACGGTGTTCCGCAAGCACCGCTGGCGGTTACTGGTGACACCGACAAAACCGGCACCATGGTGCGTTTCTGGCCAAGCCTTGAAACTTTCACCAATGTGACCGAGTTCGAATACGATATTCTGGCGAAGCGTCTGCGTGAGCTGTCCTTCCTCAACTCCGGCGTGTCTATTCGTCTGAAAGACAAACGCGACGGCAAAGAAGACCACTTCCACTATGAAGGCGGCATTAAGGCGTTCGTTGAATATCTGAACAAGAACAAAACGCCGATTCACCCGAACATCTTCTACTTCTCCACCGAA…	CGATGCTGCCGTCGAGAAAGCCTATAAAGGTGAGCGTAAAATCTCCTGGATGGAAATTTACACCGGTGAAAAATCCACACAGGTTTATGGTCAGGACGTCTGGTTGCCTGCTGAAACCCTTGATCTGATTCGTGAATATCGCGTTGCTATCAAAGGCCCTCTGACCACTCCGGTTGGCGGCGGTATTCGTTCTCTTAACGTTGCCCTGCGTCAGGAGCTGGATCTTTACATCTGCCTGCGTCCGGTACGTTACTACCAGGGCACCCCAAGCCCGGTTAAACACCCTGAACTGACCGATATGGTTATCTTCCGTGAAAACTCGGAAGACATTTATGCGGGTATCGAATGGAAAGCTGACTCTGCCGACGCAGAGAAAGTGATTAAATTCCTGCGTGAAGA…	GGTGTAGCGCGTAAACCGGGTATGGATCGTTCCGACCTGTTTAACGTTAACGCCGGTATTGTGAAGAATCTGGTTCAGCAAGTTGCGAAAACTTGCCCGAAAGCGTGCATTGGCATTATCACTAACCCGGTTAACACCACTGTGGCTATCGCTGCGGAAGTGCTGAAAAAAGCCGGTGTTTATGACAAAAACAAGCTGTTTGGCGTTACTACGCTGGATATTATTCGTTCCAACACCTTTGTCGCGGAACTGAAAGGTAAACAACCGGGTGATGTAGAAGTGCCTGTTATTGGCGGTCACTCTGGCGTTACTATTCTGCCGCTGCTGTCACAGGTTTCTGGCGTCAGTTTTACCGAGCAGGAAGTCGCAGATCTGACCAAACGTATCCAGAACGCGGGC…	ATAACGCGCGTGAGAAAGCGCGTGGCGCGAAAGCGATCGGCACCACGGGGCGTGGTATCGGGCCTGCTTATGAAGATAAAGTGGCACGTCGCGGTCTGCGTGTTGGCGACCTTTTCGACAAAGAAACCTTCGCTGAAAAACTGAAAGAAGTGATGGAATATCACAACTTCCAGTTGGTTAACTACTACAAAGTTGAAGCGGTTGATTACCAGAAAGTTCTGGATGATGTGATGGCCGTTGCCGACATCCTGACTTCCATGGTGGTTGACGTTTCTGACCTGCTTGACCAGGCGCGTCAGCGTGGCGATTTCGTCATGTTTGAAGGTGCGCAGGGTACGCTTCTGGATATCGACCACGGTACTTATCCGTACGTAACCTCTTCCAACACCACTGCGGGTG…	TGCTCGTAAACTGGGCGTCGATATCGACAACCTGCTGTGTTCCCAGCCGGACACTGGCGAACAGGCGCTGGAAATCTGTGACGCCCTGGCGCGCTCTGGCGCAGTAGACGTTATCGTTGTTGACTCCGTAGCGGCACTGACGCCGAAAGCGGAAATCGAAGGTGAAATCGGCGACTCTCACATGGGCCTTGCGGCACGTATGATGAGCCAGGCGATGCGTAAGCTGGCGGGTAACCTGAAGCAGTCCAACACGCTGCTGATCTTCATCAACCAGATCCGTATGAAAATTGGTGTGATGTTCGGTAACCCGGAAACCACTACCGGTGGTAACGCGCTGAAATTCTACGCCTCTGTTCGTCTCGACATCCGTCGTATCGGCGCGGTGAAAGAGGGCGAAAA…
2704	GGGGAAAGGGACTCAGGCTCAGTTCATCATGGAGAAATATGGTATTCCGCAAATCTCCACAGGTGATATGCTGCGTGCCGCAGTCAAATCTGGCTCCGAGCTGGGTAAACAAGCAAAAGACATTATGGACGCTGGCAAACTGGTTACCGATGAACTGGTGATCGCGCTGGTTAAAGAACGTATTGCTCAGGAAGACTGCCGTAACGGTTTCCTGCTTGACGGCTTCCCGCGTACTATTCCGCAGGCTGACGCGATGAAAGAAGCGGGCATCAATGTTGATTACGTTCTGGAGTTCGACGTACCGGACGAACTGATTGTTGATCGTATTGTTGGTCGCCGCGTTCACGCGCCATCTGGCCGTGTTTATCACGTTAAATTCAATCCGCCGAAAGTAGAAGG…	CGAGAGCCATTCGCCAGGCGGCGGATGAAGTGCTGGCAGGGCAACATGATGATGAGTTCCCGCTGGCAATCTGGCAAACGGGATCCGGTACGCAAAGCAATATGAATATGAATGAAGTACTGGCTAATCGGGCCAGCGAATTGCTTGGCGGTGTACGCGGAATGGAACGTAAAGTTCACCCTAACGATGACGTGAACAAAAGCCAAAGCTCCAATGATGTCTTCCCAACTGCTATGCACGTAGCGGCGTTATTGGCACTGCGTAAGCAACTCATTCCTCAGCTCAAAAACCTCACTCAAACTCTGAATGAGAAATCGCGCGCATTTGCCGATATCGTCAAAATTGGTCGTACCCACTTGCAGGACGCCACACCGCTGACCCTGGGACAGGAGATTTCTG…	GGTCTGCACGGCGTTGGTGTTTCGGTAGTAAACGCCCTGTCGCAAAAACTGGAGCTGGTTATTCAGCGCGAGGGTAAAATTCACCGTCAGATCTACGAACACGGTGTTCCGCAAGCACCGCTGGCGGTTACTGGTGACACCGACAAAACCGGCACCATGGTGCGTTTCTGGCCAAGCCTTGAAACTTTCACCAATGTGACCGAGTTCGAATACGATATTCTGGCGAAGCGTCTGCGTGAGCTGTCCTTCCTCAACTCCGGCGTGTCTATTCGTCTGAAAGACAAACGCGACGGCAAAGAAGACCACTTCCACTATGAAGGCGGCATTAAGGCGTTCGTTGAATATCTGAACAAGAACAAAACGCCGATTCACCCGAACATCTTCTACTTCTCCACCGAA…	CGACGCTGCAGTCGAGAAAGCCTATAAAGGCGAGCGTAAAATCTCCTGGATGGAAATTTACACCGGTGAAAAATCCACACAGGTTTATGGTCAGGATGTCTGGTTGCCTGCTGAAACCCTTGATCTGATTCGTGAATATCGCGTTGCTATCAAAGGCCCTCTGACCACTCCGGTTGGCGGCGGTATTCGTTCTCTTAACGTTGCCCTGCGCCAGGAGCTGGATCTTTACATCTGCCTGCGTCCGGTACGTTACTACCAGGGCACCCCAAGCCCGGTTAAACACCCTGAACTGACCGATATGGTTATCTTCCGTGAAAACTCGGAAGACATTTATGCGGGTATCGAATGGAAAGCTGACTCTGCCGACGCAGAGAAAGTGATTAAATTCCTGCGTGAAGA…	GGTGTAGCGCGTAAACCGGGTATGGATCGTTCCGACCTGTTTAACGTTAACGCCGGTATTGTGAAGAATCTGGTTCAGCAAGTTGCGAAAACTTGCCCGAAAGCGTGCATTGGCATTATCACTAACCCGGTTAACACCACTGTGGCTATCGCTGCGGAAGTGCTGAAAAAAGCCGGTGTTTATGACAAAAACAAGCTGTTTGGCGTTACTACGCTGGATATTATTCGTTCCAACACCTTTGTCGCGGAACTGAAAGGTAAACAACCGGGTGATGTAGAAGTGCCTGTTATTGGCGGTCACTCTGGCGTTACTATTCTGCCGCTGCTGTCACAGGTTCCTGGCGTCAGTTTTACCGAGCAGGAAGTCGCAGATCTGACCAAACGTATCCAGAACGCGGGC…	ATAACGCGCGTGAGAAAGCGCGCGGCGCGAAAGCGATCGGCACCACGGGGCGTGGTATCGGGCCTGCTTATGAAGATAAAGTGGCACGTCGCGGTCTGCGTGTTGGCGACCTTTTCGACAAAGAAACCTTCGCTGAAAAACTGAAAGAAGTGATGGAATATCACAACTTCCAGTTGGTTAACTACTACAAAGTTGAAGCGGTTGATTACCAGAAAGTTCTGGATGATGTGATGGCCGTTGCCGACATCCTGACTTCCATGGTGGTTGACGTTTCTGACCTGCTTGACCAGGCGCGTCAGCGTGGCGATTTCGTCATGTTTGAAGGTGCGCAGGGTACGCTGCTGGATATCGACCACGGTACTTATCCGTACGTAACCTCTTCCAACACCACTGCGGGCG…	TGCTCGTAAACTGGGCGTCGATATCGACAACCTGCTGTGTTCCCAGCCGGACACTGGCGAACAGGCGCTGGAAATCTGTGACGCCCTGGCGCGCTCTGGCGCAGTAGACGTTATCGTTGTTGACTCCGTAGCGGCACTGACGCCGAAAGCGGAAATCGAAGGTGAAATCGGCGACTCTCACATGGGCCTTGCGGCACGTATGATGAGCCAGGCGATGCGTAAGCTGGCGGGTAACCTGAAGCAGTCCAACACGCTGCTGATCTTCATCAACCAGATCCGTATGAAAATTGGTGTGATGTTCGGTAACCCGGAAACCACTACCGGTGGTAACGCGCTGAAATTCTACGCCTCTGTTCGTCTCGACATCCGTCGTATCGGCGCGGTGAAAGAGGGCGAAAA…
2817	GGGGAAAGGGACTCAGGCTCAGTTCATCATGGAGAAATATGGTATTCCGCAAATCTCCACAGGTGATATGCTGCGTGCCGCAGTCAAATCTGGCTCCGAGCTGGGTAAACAAGCAAAAGACATTATGGACGCTGGCAAACTGGTTACCGATGAACTGGTGATCGCGCTGGTTAAAGAACGTATTGCTCAGGAAGACTGCCGTAACGGTTTCCTGCTTGACGGCTTCCCGCGTACTATTCCGCAGGCTGACGCGATGAAAGAAGCGGGCATCAATGTTGATTACGTTCTGGAGTTCGACGTACCGGACGAACTGATTGTTGATCGTATTGTTGGTCGCCGCGTTCACGCGCCATCTGGCCGTGTTTATCACGTTAAATTCAATCCGCCGAAAGTAGAAGG…	CGAGAGCCATTCGCCAGGCGGCGGATGAAGTGCTGGCAGGGCAACATGATGATGAGTTCCCGCTGGCAATCTGGCAAACGGGATCCGGTACGCAAAGCAATATGAATATGAATGAAGTACTGGCTAATCGGGCCAGCGAATTGCTTGGCGGCGTACGCGGAATGGAACGTAAAGTTCACCCTAACGATGACGTGAACAAAAGCCAAAGCTCCAATGATGTCTTCCCAACTGCTATGCACGTGGCGGCGTTATTGGCACTGCGTAAGCAACTCATTCCTCAGCTCAAAAACCTCACTCAAACTCTGAATGAGAAATCGCGCGCATTTGCCGATATCGTCAAAATTGGTCGTACCCACTTGCAGGACGCCACACCGCTGACCCTGGGACAGGAGATTTCTG…	GGTCTGCACGGCGTTGGTGTTTCGGTAGTAAACGCCCTGTCGCAAAAACTGGAGCTGGTTATTCAGCGCGAGGGTAAAATTCACCGTCAGATCTACGAACACGGTGTTCCGCAGGCACCGCTGGCGGTTACTGGTGACACCGACAAAACCGGCACCATGGTGCGTTTCTGGCCAAGCCTTGAAACTTTCACCAATGTGACCGAGTTCGAATACGATATTCTGGCGAAGCGTCTGCGTGAGCTGTCCTTCCTCAACTCCGGCGTGTCTATTCGTCTGAAAGACAAACGCGACGGCAAAGAAGACCACTTCCACTATGAAGGCGGCATTAAGGCATTCGTTGAATATCTGAACAAGAACAAAACGCCGATTCACCCGAACATCTTCTACTTCTCCACCGAA…	CGATGCTGCCGTCGAGAAAGCCTATAAAGGTGAGCGTAAAATCTCCTGGATGGAAATTTACACCGGTGAAAAATCCACACAGGTTTATGGTCAGGACGTCTGGCTGCCTGCTGAAACCCTTGATCTGATTCGTGAATATCGCGTTGCTATCAAAGGCCCTCTGACCACTCCGGTTGGCGGCGGTATTCGTTCTCTTAACGTTGCCCTGCGTCAGGAGCTGGATCTTTACATCTGCCTGCGTCCGGTACGTTACTACCAGGGCACCCCAAGCCCGGTTAAACACCCTGAACTGACCGATATGGTTATCTTCCGTGAAAACTCGGAAGACATTTATGCGGGTATCGAATGGAAAGCTGACTCTGCCGACGCTGAGAAAGTGATCAAATTCCTGCGTGAAGA…	GGTGTAGCGCGTAAACCGGGTATGGATCGTTCCGACCTGTTTAACGTTAACGCCGGTATTGTGAAGAATCTGGTTCAGCAAGTTGCGAAAACTTGCCCGAAAGCGTGCATTGGCATTATCACTAACCCGGTTAACACCACTGTGGCTATCGCTGCGGAAGTGCTGAAAAAAGCCGGTGTTTATGACAAAAACAAGCTGTTTGGCGTTACTACGCTGGATATTATTCGTTCCAACACCTTTGTCGCGGAACTGAAAGGTAAACAACCGGGTGATGTAGAAGTGCCGGTTATTGGCGGTCACTCTGGCGTTACTATTCTGCCGCTGCTGTCACAGGTTCCTGGCGTCAGTTTTACCGAGCAGGAAGTCGCAGATCTGACCAAACGTATCCAGAACGCGGGC…	ATAACGCGCGTGAGAAAGCGCGTGGCGCGAAAGCGATCGGCACCACGGGGCGTGGTATCGGGCCTGCTTATGAAGATAAAGTGGCACGTCGCGGTCTGCGTGTTGGCGACCTTTTCGACAAAGAAACCTTCGCTGAAAAACTGAAAGAAGTGATGGAATATCACAACTTCCAGTTGGTTAACTACTACAAAGTTGAAGCGGTTGATTACCAGAAAGTTCTGGATGATGTGATGGCCGTTGCCGACATCCTGACTTCCATGGTGGTTGACGTTTCTGACCTGCTTGACCAGGCGCGTCAGCGTGGCGATTTCGTCATGTTTGAAGGTGCGCAGGGTACGCTTCTGGATATCGACCACGGTACTTATCCGTACGTAACCTCTTCCAACACCACTGCGGGTG…	TGCTCGTAAACTGGGCGTCGATATCGACAACCTGCTGTGTTCCCAGCCGGACACTGGCGAACAGGCGCTGGAAATCTGTGACGCCCTGGCGCGCTCTGGCGCAGTAGACGTTATCGTTGTTGACTCCGTAGCGGCACTGACGCCGAAAGCGGAAATCGAAGGTGAAATCGGCGACTCTCACATGGGCCTTGCGGCACGTATGATGAGCCAGGCGATGCGTAAGCTGGCGGGTAACCTGAAGCAGTCCAACACGCTGCTGATCTTCATCAACCAGATCCGTATGAAAATTGGTGTGATGTTCGGTAACCCGGAAACCACTACCGGTGGTAACGCGCTGAAATTCTACGCCTCTGTTCGTCTCGACATCCGTCGTATCGGCGCGGTGAAAGAGGGCGAAAA…
2818	GGGGAAAGGGACTCAGGCTCAGTTCATCATGGAGAAATATGGTATTCCGCAAATCTCCACAGGTGATATGCTGCGTGCTGCGGTCAAATCTGGCTCCGAGCTGGGTAAACAAGCAAAAGACATTATGGACGCTGGCAAACTGGTTACCGATGAACTGGTGATCGCGCTGGTTAAAGAACGTATTGCTCAGGAAGACTGCCGTAACGGTTTCCTGCTTGACGGCTTCCCGCGTACTATTCCGCAGGCTGACGCGATGAAAGAAGCGGGCATCAATGTTGATTACGTTCTGGAGTTCGACGTACCGGACGAACTGATTGTTGATCGTATTGTTGGTCGCCGCGTTCACGCGCCATCTGGCCGTGTTTATCACGTTAAATTCAATCCGCCGAAAGTAGAAGG…	CGAGAGCCATTCGCCAGGCGGCGGATGAAGTGCTGGCAGGGCAACATGATGATGAGTTCCCGCTGGCAATCTGGCAAACGGGATCTGGTACGCAAAGCAATATGAATATGAATGAAGTACTGGCTAATCGGGCCAGCGAATTGCTTGGCGGCGTACGCGGAATGGAACGTAAAGTTCACCCTAACGATGACGTGAACAAAAGCCAAAGCTCCAATGATGTCTTCCCAACTGCTATGCACGTAGCGGCGTTATTGGCACTGCGTAAGCAACTCATTCCTCAGCTCAAAAACCTCACTCAAACTCTGAATGAGAAATCGCGCGCATTTGCCGATATCGTCAAAATTGGTCGTACCCACTTGCAGGACGCCACACCGCTGACCCTGGGACAGGAGATTTCTG…	GGTCTGCACGGCGTTGGTGTTTCGGTAGTAAACGCCCTGTCGCAAAAACTGGAGCTGGTTATTCAGCGCGAGGGTAAAATTCACCGTCAGATCTACGAACACGGTGTTCCGCAGGCACCGCTGGCGGTTACTGGTGACACCGACAAAACCGGCACCATGGTGCGTTTCTGGCCAAGCCTTGAAACTTTCACCAATGTGACCGAGTTCGAATACGATATTCTGGCGAAGCGTCTACGTGAGCTGTCCTTCCTCAACTCCGGCGTGTCTATTCGTCTGAAAGACAAACGCGACGGCAAAGAAGACCACTTCCACTATGAAGGCGGCATTAAGGCGTTCGTTGAATATCTGAACAAGAACAAAACGCCGATTCACCCGAACATCTTCTACTTCTCCACCGAA…	CGACGCTGCAGTCGAGAAAGCCTATAAAGGCGAGCGTAAAATCTCCTGGATGGAAATTTACACCGGTGAAAAATCCACACAGGTTTATGGTCAGGATGTCTGGTTGCCTGCTGAAACCCTTGATCTGATTCGTGAATATCGCGTTGCTATCAAAGGCCCTCTGACCACTCCGGTTGGCGGCGGTATTCGTTCTCTTAACGTTGCCCTGCGCCAGGAGCTGGATCTTTACATCTGCCTGCGTCCGGTACGTTACTACCAGGGCACCCCAAGCCCGGTTAAACACCCTGAACTGACCGATATGGTTATCTTCCGTGAAAACTCGGAAGACATTTATGCGGGTATCGAATGGAAAGCTGACTCTGCCGACGCAGAGAAAGTGATTAAATTCCTGCGTGAAGA…	GGTGTAGCGCGTAAACCGGGTATGGATCGTTCCGACCTGTTTAACGTTAACGCCGGTATTGTGAAGAATCTGGTTCAGCAAGTTGCGAAAACTTGCCCGAAAGCGTGCATTGGCATTATCACTAACCCGGTTAACACCACTGTGGCTATCGCTGCGGAAGTGCTGAAAAAAGCCGGTGTTTATGACAAAAACAAGCTGTTTGGCGTTACTACGCTGGATATTATTCGTTCCAACACCTTTGTCGCGGAACTGAAAGGTAAACAACCGGGTGATGTAGAAGTGCCTGTTATTGGCGGTCACTCTGGCGTTACTATTCTGCCGCTGCTGTCACAGGTTCCTGGCGTCAGTTTTACCGAGCAGGAAGTCGCAGATCTGACCAAACGTATCCAGAACGCGGGC…	ATAACGCGCGTGAGAAAGCGCGTGGCGCGAAAGCGATCGGCACCACGGGGCGTGGTATCGGGCCTGCTTATGAAGATAAAGTGGCACGTCGCGGTCTGCGTGTTGGCGACCTTTTCGACAAAGAAACCTTCGCTGAAAAACTGAAAGAAGTGATGGAATATCACAACTTCCAGTTGGTTAACTACTACAAAGTTGAAGCGGTTGATTACCAGAAAGTTCTGGATGATGTGATGGCCGTTGCCGACATCCTGACTTCCATGGTGGTTGACGTTTCTGACCTGCTTGACCAGGCGCGTCAGCGTGGCGATTTCGTCATGTTTGAAGGTGCGCAGGGTACGCTTCTGGATATCGACCACGGTACTTATCCGTACGTAACCTCTTCCAACACCACTGCGGGCG…	TGCTCGTAAACTGGGCGTCGATATCGACAACCTGCTGTGTTCCCAGCCGGACACTGGCGAACAGGCGCTGGAAATCTGTGACGCCCTGGCGCGCTCTGGCGCAGTAGACGTTATCGTTGTTGACTCCGTAGCGGCACTGACGCCGAAAGCGGAAATCGAAGGTGAAATCGGCGACTCTCACATGGGCCTTGCGGCACGTATGATGAGCCAGGCGATGCGTAAGCTGGCGGGTAACCTGAAGCAGTCCAACACGCTGCTGATCTTCATCAACCAGATCCGTATGAAAATTGGTGTGATGTTCGGTAACCCGGAAACCACTACCGGTGGTAACGCGCTGAAATTCTACGCCTCTGTTCGTCTCGACATCCGTCGTATCGGCGCGGTGAAAGAGGGCGAAAA…
2869	GGGGAAAGGGACTCAGGCTCAGTTCATCATGGAGAAATATGGTATTCCGCAAATCTCCACAGGTGATATGCTGCGTGCTGCGGTCAAATCTGGCTCCGAGCTGGGTAAACAAGCAAAAGACATTATGGACGCTGGCAAACTGGTTACCGATGAACTGGTGATCGCGCTGGTTAAAGAACGTATTGCTCAGGAAGACTGCCGTAACGGTTTCCTGCTTGACGGCTTCCCGCGTACTATTCCGCAGGCTGACGCGATGAAAGAAGCGGGCATCAATGTTGATTACGTTCTGGAGTTCGACGTACCGGACGAACTGATTGTTGATCGTATTGTTGGTCGCCGCGTTCACGCGCCATCTGGCCGTGTTTATCACGTTAAATTCAATCCGCCGAAAGTAGAAGG…	CGAGAGCTATTCGCCAGGCGGCGGATGAAGTGCTGGCAGGGCAACATGATGATGAGTTCCCGCTGGCAATCTGGCAAACGGGATCTGGTACGCAAAGCAATATGAATATGAATGAAGTACTGGCTAACCGGGCCAGCGAATTGCTTGGCGGCGTACGCGGAATGGAACGTAAAGTTCACCCTAACGATGACGTGAACAAAAGCCAAAGCTCCAATGATGTCTTCCCAACTGCTATGCACGTGGCGGCGTTATTGGCACTGCGTAAGCAACTCATTCCTCAGCTCAAAAACCTCACTCAAACTCTGAATGAGAAATCGCGCGCATTTGCCGATATCGTCAAAATTGGTCGTACCCACTTGCAGGACGCCACACCGCTGACTCTGGGACAGGAGATTTCTG…	GGTCTGCACGGCGTTGGTGTTTCGGTAGTAAACGCCCTGTCGCAAAAACTGGAGCTGGTTATTCAGCGCGAGGGTAAAATTCACCGTCAGATCTACGAACACGGTGTTCCGCAGGCACCGCTGGCGGTTACTGGTGACACCGACAAAACCGGCACCATGGTGCGTTTCTGGCCAAGCCTTGAAACTTTCACCAATGTGACCGAGTTCGAATACGATATTCTGGCGAAGCGTCTGCGTGAGCTGTCCTTCCTCAATTCCGGCGTGTCTATTCGTCTGAAAGACAAACGCGACGGCAAAGAAGACCACTTCCACTATGAAGGCGGCATTAAGGCGTTCGTTGAATATCTGAACAAGAACAAAACGCCGATTCACCCGAACATCTTCTACTTCTCCACCGAA…	CGATGCTGCCGTCGAGAAAGCCTATAAAGGTGAGCGTAAAATCTCCTGGATGGAAATTTACACCGGTGAAAAATCCACACAGGTTTATGGTCAGGACGTCTGGCTGCCTGCTGAAACCCTTGATCTGATTCGTGAATATCGCGTTGCTATCAAAGGCCCTCTGACCACTCCGGTTGGCGGCGGTATTCGTTCTCTTAACGTTGCCCTGCGCCAGGAGCTGGATCTTTACATCTGCCTGCGTCCGGTACGTTACTACCAGGGCACTCCAAGCCCGGTTAAACACCCTGAACTGACCGATATGGTTATCTTCCGTGAAAACTCGGAAGACATTTATGCGGGTATCGAATGGAAAGCTGACTCTGCCGACGCAGAGAAAGTGATTAAATTCCTGCGTGAAGA…	GGTGTAGCGCGTAAACCGGGTATGGATCGTTCCGACCTGTTTAACGTTAACGCCGGTATTGTGAAGAATCTGGTTCAGCAAGTTGCGAAAACTTGCCCGAAAGCGTGCATTGGCATTATCACTAACCCGGTTAACACCACTGTGGCTATCGCTGCGGAAGTGCTGAAAAAAGCCGGTGTTTATGACAAAAACAAGCTGTTTGGCGTTACTACGCTGGATATTATTCGTTCCAACACCTTTGTCGCGGAACTGAAAGGTAAACAACCGGGTGATGTAGAAGTGCCGGTTATTGGCGGTCACTCTGGCGTTACTATTCTGCCGCTGCTGTCACAGGTTCCTGGCGTCAGTTTTACCGAGCAGGAAGTCGCAGATCTGACCAAACGTATCCAGAACGCGGGT…	ATAACGCGCGTGAGAAAGCGCGTGGCGCGAAAGCGATCGGCACCACGGGGCGTGGTATCGGGCCTGCTTATGAAGATAAAGTGGCACGTCGCGGTCTGCGTGTTGGCGACCTTTTCGACAAAGAAACCTTCGCTGAAAAACTGAAAGAAGTGATGGAATATCACAACTTCCAGTTGGTTAACTACTACAAAGTTGAAGCGGTTGATTACCAGAAAGTTCTGGATGATGTGATGGCCGTTGCCGACATCCTGACTTCCATGGTGGTTGACGTTTCTGACCTGCTCGATCAGGCGCGTCAGCGTGGCGATTTCGTCATGTTTGAAGGTGCGCAGGGTACGCTTCTGGATATCGACCACGGTACTTATCCGTACGTAACCTCTTCCAACACCACTGCGGGTG…	TGCTCGTAAACTGGGCGTCGATATCGACAACCTGCTGTGTTCCCAGCCGGACACTGGCGAACAGGCGCTGGAAATCTGTGACGCCCTGGCGCGCTCTGGCGCAGTAGATGTTATCGTTGTTGACTCCGTAGCGGCACTGACGCCGAAAGCGGAAATCGAAGGTGAAATCGGCGACTCTCACATGGGCCTTGCGGCACGTATGATGAGCCAGGCGATGCGTAAGCTGGCGGGTAACCTGAAGCAGTCCAACACGCTGCTGATCTTCATCAACCAGATCCGTATGAAAATTGGTGTGATGTTCGGTAACCCGGAAACCACTACCGGTGGTAACGCGCTGAAATTCTACGCCTCTGTTCGTCTCGACATCCGTCGTATCGGCGCGGTGAAAGAGGGCGAAAA…
2873	GGGGAAAGGGACTCAGGCTCAGTTCATCATGGAGAAATATGGTATTCCGCAAATCTCCACAGGTGATATGCTGCGTGCTGCGGTCAAATCTGGCTCCGAGCTGGGTAAACAAGCAAAAGACATTATGGACGCTGGCAAACTGGTTACCGATGAACTGGTGATCGCGCTGGTTAAAGAACGTATTGCTCAGGAAGACTGCCGTAACGGTTTCCTGCTTGACGGCTTCCCGCGTACTATTCCGCAGGCTGACGCGATGAAAGAAGCGGGCATCAATGTTGATTACGTTCTGGAGTTCGACGTACCGGACGAACTGATTGTTGATCGTATTGTTGGTCGCCGCGTTCACGCGCCATCTGGCCGTGTTTATCACGTTAAATTCAATCCGCCGAAAGTAGAAGG…	CGAGAGCTATTCGCCAGGCGGCGGATGAAGTGCTGGCAGGGCAACATGATGATGAGTTCCCGCTGGCAATCTGGCAAACGGGATCTGGTACGCAAAGCAATATGAATATGAATGAAGTACTGGCTAACCGGGCCAGCGAATTGCTTGGCGGCGTACGCGGAATGGAACGTAAAGTTCACCCTAACGATGACGTGAACAAAAGCCAAAGCTCCAATGATGTCTTCCCAACTGCTATGCACGTGGCGGCGTTATTGGCACTGCGTAAGCAACTCATTCCTCAGCTCAAAAACCTCACTCAAACTCTGAATGAGAAATCGCGCGCATTTGCCGATATCGTCAAAATTGGTCGTACCCACTTGCAGGACGCCACACCGCTGACTCTGGGACAGGAGATTTCTG…	GGTCTGCACGGCGTTGGTGTTTCGGTAGTAAACGCCCTGTCGCAAAAACTGGAGCTGGTTATTCAGCGCGAGGGTAAAATTCACCGTCAGATCTACGAACACGGTGTTCCGCAGGCACCGCTGGCGGTTACTGGTGACACCGACAAAACCGGCACCATGGTGCGTTTCTGGCCAAGCCTTGAAACTTTCACCAATGTGACCGAGTTCGAATACGATATTCTGGCGAAGCGTCTGCGTGAGCTGTCCTTCCTCAATTCCGGCGTGTCTATTCGTCTGAAAGACAAACGCGACGGCAAAGAAGACCACTTCCACTATGAAGGCGGCATTAAGGCGTTCGTTGAATATCTGAACAAGAACAAAACGCCGATTCACCCGAACATCTTCTACTTCTCCACCGAA…	CGATGCTGCCGTCGAGAAAGCCTATAAAGGTGAGCGTAAAATCTCCTGGATGGAAATTTACACCGGTGAAAAATCCACACAGGTTTATGGTCAGGACGTCTGGCTGCCTGCTGAAACCCTTGATCTGATTCGTGAATATCGCGTTGCTATCAAAGGCCCTCTGACCACTCCGGTTGGCGGCGGTATTCGTTCTCTTAACGTTGCCCTGCGCCAGGAGCTGGATCTTTACATCTGCCTGCGTCCGGTACGTTACTACCAGGGCACTCCAAGCCCGGTTAAACACCCTGAACTGACCGATATGGTTATCTTCCGTGAAAACTCGGAAGACATTTATGCGGGTATCGAATGGAAAGCTGACTCTGCCGACGCAGAGAAAGTGATTAAATTCCTGCGTGAAGA…	GGTGTAGCGCGTAAACCGGGTATGGATCGTTCCGACCTGTTTAACGTTAACGCCGGTATTGTGAAGAATCTGGTTCAGCAAGTTGCGAAAACTTGCCCGAAAGCGTGCATTGGCATTATCACTAACCCGGTTAACACCACTGTGGCTATCGCTGCGGAAGTGCTGAAAAAAGCCGGTGTTTATGACAAAAACAAGCTGTTTGGCGTTACTACGCTGGATATTATTCGTTCCAACACCTTTGTCGCGGAACTGAAAGGTAAACAACCGGGTGATGTAGAAGTGCCGGTTATTGGCGGTCACTCTGGCGTTACTATTCTGCCGCTGCTGTCACAGGTTCCTGGCGTCAGTTTTACCGAGCAGGAAGTCGCAGATCTGACCAAACGTATCCAGAACGCGGGT…	ATAACGCGCGTGAGAAAGCGCGTGGCGCGAAAGCGATCGGCACCACGGGGCGTGGTATCGGGCCTGCTTATGAAGATAAAGTGGCACGTCGCGGTCTGCGTGTTGGCGACCTTTTCGACAAAGAAACCTTCGCTGAAAAACTGAAAGAAGTGATGGAATATCACAACTTCCAGTTGGTTAACTACTACAAAGTTGAAGCGGTTGATTACCAGAAAGTTCTGGATGATGTGATGGCCGTTGCCGACATCCTGACTTCCATGGTGGTTGACGTTTCTGACCTGCTCGATCAGGCGCGTCAGCGTGGCGATTTCGTCATGTTTGAAGGTGCGCAGGGTACGCTTCTGGATATCGACCACGGTACTTATCCGTACGTAACCTCTTCCAACACCACTGCGGGTG…	TGCTCGTAAACTGGGCGTCGATATCGACAACCTGCTGTGTTCCCAGCCGGACACTGGCGAACAGGCGCTGGAAATCTGTGACGCCCTGGCGCGCTCTGGCGCAGTAGATGTTATCGTTGTTGACTCCGTAGCGGCACTGACGCCGAAAGCGGAAATCGAAGGTGAAATCGGCGACTCTCACATGGGCCTTGCGGCACGTATGATGAGCCAGGCGATGCGTAAGCTGGCGGGTAACCTGAAGCAGTCCAACACGCTGCTGATCTTCATCAACCAGATCCGTATGAAAATTGGTGTGATGTTCGGTAACCCGGAAACCACTACCGGTGGTAACGCGCTGAAATTCTACGCCTCTGTTCGTCTCGACATCCGTCGTATCGGCGCGGTGAAAGAGGGCGAAAA…
2877	GGGGAAAGGGACTCAGGCTCAGTTCATCATGGAGAAATATGGTATTCCGCAAATCTCCACAGGTGATATGCTGCGTGCCGCAGTCAAATCTGGCTCCGAGCTGGGTAAACAAGCAAAAGACATTATGGACGCTGGCAAACTGGTTACCGATGAACTGGTGATCGCGCTGGTTAAAGAACGTATTGCTCAGGAAGACTGCCGTAACGGTTTCCTGCTTGACGGCTTCCCGCGTACTATTCCGCAGGCTGACGCGATGAAAGAAGCGGGCATCAATGTTGATTACGTTCTGGAGTTCGACGTACCGGACGAACTGATTGTTGATCGTATTGTTGGTCGCCGCGTTCACGCGCCATCTGGCCGTGTTTATCACGTTAAATTCAATCCGCCGAAAGTAGAAGG…	CGAGAGCCATTCGCCAGGCGGCGGATGAAGTGCTGGCAGGGCAACATGATGATGAGTTCCCGCTGGCAATCTGGCAAACGGGATCCGGTACGCAAAGCAATATGAATATGAATGAAGTACTGGCTAATCGGGCCAGCGAATTGCTTGGCGGCGTACGCGGAATGGAACGTAAAGTTCACCCTAACGATGACGTGAACAAAAGCCAAAGCTCCAATGATGTCTTCCCAACTGCTATGCACGTAGCGGCGTTATTGGCACTGCGTAAGCAACTCATTCCTCAGCTCAAAAACCTCACTCAAACTCTGAATGAGAAATCGCGCGCATTTGCCGATATCGTCAAAATTGGTCGTACCCACTTGCAGGACGCCACACCGCTGACCCTGGGACAGGAGATTTCTG…	GGTCTGCACGGCGTTGGTGTTTCGGTAGTAAACGCCCTGTCGCAAAAACTGGAGCTGGTTATTCAGCGCGAGGGTAAAATTCACCGTCAGATCTACGAACACGGTGTACCGCAGGCTCCGCTGGCGGTTACCGGCGAGACTGAAAAAACCGGCACCATGGTGCGTTTCTGGCCTAGCCTCGAAACCTTCACCAATGTGACCGAATTCGAATATGACATTCTGGCGAAACGTCTGCGTGAGTTGTCGTTCCTCAACTCCGGCGTTTCCATTCGTCTGCGCGACAAGCGCGACGGCAAAGAAGACCACTTCCACTATGAAGGCGGCATTAAGGCGTTCGTTGAATATCTGAACAAGAACAAAACGCCGATTCACCCGAACATCTTCTACTTCTCCACCGAA…	CGATGCTGCCGTCGAGAAAGCCTATAAAGGTGAGCGTAAAATCTCCTGGATGGAAATTTACACCGGTGAAAAATCCACACAGGTTTATGGTCAGGACGTCTGGCTGCCTGCTGAAACCCTTGATCTGATTCGTGAATATCGCGTTGCCATTAAAGGCCCTCTGACCACTCCGGTTGGTGGCGGTATTCGTTCTCTCAACGTAGCTCTGCGCCAGGAACTGGATCTCTACATCTGCCTGCGTCCGGTACGTTACTATCAGGGCACCCCAAGCCCGGTTAAACACCCTGAACTGACCGATATGGTTATCTTCCGTGAAAACTCGGAAGATATTTATGCGGGTATCGAATGGAAAGCTGACTCTGCCGACGCTGAGAAAGTGATTAAATTCCTGCGTGAAGA…	GGTGTAGCGCGTAAACCGGGTATGGATCGTTCCGACCTGTTTAACGTTAACGCCGGTATTGTGAAGAATCTGGTTCAGCAAGTTGCGAAAACTTGCCCGAAAGCGTGCATTGGCATTATCACTAACCCGGTTAACACCACTGTGGCTATCGCTGCGGAAGTGCTGAAAAAAGCCGGTGTTTATGACAAAAACAAGCTGTTTGGCGTTACTACGCTGGATATTATTCGTTCCAACACCTTTGTCGCGGAACTGAAAGGTAAACAACCGGGTGATGTAGAAGTGCCTGTTATTGGCGGTCACTCTGGCGTTACTATTCTGCCGCTGCTGTCACAGGTTCCTGGCGTCAGTTTTACCGAGCAGGAAGTCGCAGATCTGACCAAACGTATCCAGAACGCGGGC…	ATAACGCGCGTGAGAAAGCGCGTGGCGCGAAAGCGATCGGCACCACGGGGCGTGGTATCGGGCCTGCTTATGAAGATAAAGTGGCACGTCGCGGTCTGCGTGTTGGCGACCTTTTCGACAAAGAAACCTTCGCTGAAAAACTGAAAGAAGTGATGGAATATCACAACTTCCAGTTGGTTAACTACTACAAAGTTGAAGCGGTTGATTACCAGAAAGTTCTGGATGATGTGATGGCCGTTGCTGACATCCTGACTTCCATGGTGGTTGACGTTTCTGACCTGCTTGACCAGGCGCGTCAGCGTGGCGATTTCGTCATGTTTGAAGGTGCGCAGGGTACGCTTCTGGATATCGACCACGGTACTTATCCGTACGTAACCTCTTCCAACACCACTGCGGGCG…	TGCTCGTAAACTGGGCGTCGATATCGACAACCTGCTGTGTTCCCAGCCGGACACTGGCGAACAGGCGCTGGAAATCTGTGACGCCCTGGCGCGCTCTGGCGCAGTAGATGTTATCGTTGTTGACTCCGTAGCGGCACTGACGCCGAAAGCGGAAATCGAAGGTGAAATCGGCGACTCTCACATGGGCCTTGCGGCACGTATGATGAGCCAGGCGATGCGTAAGCTGGCGGGTAACCTGAAGCAGTCCAACACGCTGCTGATCTTCATCAACCAGATCCGTATGAAAATTGGTGTGATGTTCGGTAACCCGGAAACCACTACCGGTGGTAACGCGCTGAAATTCTACGCCTCTGTTCGTCTCGACATCCGTCGTATCGGCGCGGTGAAAGAGGGCGAAAA…
2879	GGGGAAAGGGACTCAGGCTCAGTTCATCATGGAGAAATATGGTATTCCGCAAATCTCCACAGGTGATATGCTGCGTGCCGCAGTCAAATCTGGCTCCGAGCTGGGTAAACAAGCAAAAGACATTATGGACGCTGGCAAACTGGTTACCGATGAACTGGTGATCGCGCTGGTTAAAGAACGTATTGCTCAGGAAGACTGCCGTAACGGTTTCCTGCTTGACGGCTTCCCGCGTACTATTCCGCAGGCTGACGCGATGAAAGAAGCGGGCATCAATGTTGATTACGTTCTGGAGTTCGACGTACCGGACGAACTGATTGTTGATCGTATTGTTGGTCGTCGCGTTCACGCGCCATCTGGCCGTGTTTATCACGTTAAATTCAATCCGCCGAAAGTAGAAGG…	CGAGAGCCATTCGCCAGGCGGCGGATGAAGTGCTGGCAGGGCAACATGATGATGAGTTCCCGCTGGCAATCTGGCAAACGGGATCTGGTACGCAAAGCAATATGAATATGAATGAAGTACTGGCTAACCGGGCCAGCGAATTGCTTGGCGGCGTACGCGGAATGGAACGTAAAGTTCACCCTAACGATGACGTGAACAAAAGCCAAAGCTCCAATGATGTCTTCCCAACTGCTATGCACGTGGCGGCGTTATTGGCACTGCGTAAGCAACTCATTCCTCAGCTCAAAAACCTCACTCAAACTCTGAATGAGAAATCGCGCGCATTTGCCGATATCGTCAAAATTGGTCGTACCCACTTGCAGGACGCCACACCGCTGACCCTGGGACAGGAGATTTCTG…	GGTCTGCACGGCGTTGGTGTTTCGGTAGTAAACGCCCTGTCGCAAAAACTGGAGCTGGTTATTCAGCGCGAGGGTAAAATTCACCGTCAGATCTACGAACACGGTGTTCCGCAGGCACCGCTGGCGGTTACTGGTGACACCGACAAAACCGGCACCATGGTGCGTTTCTGGCCAAGCCTTGAAACTTTCACCAATGTGACCGAGTTCGAATACGATATTCTGGCGAAGCGTCTGCGTGAGCTGTCCTTCCTCAATTCCGGCGTGTCTATTCGTCTGAAAGACAAACGCGACGGCAAAGAAGACCACTTCCACTATGAAGGCGGCATTAAGGCGTTCGTTGAATATCTGAACAAGAACAAAACGCCGATTCACCCGAACATCTTCTACTTCTCCACCGAA…	CGATGCTGCCGTCGAGAAAGCCTATAAAGGTGAGCGTAAAATCTCCTGGATGGAAATTTACACCGGTGAAAAATCCACACAGGTTTATGGTCAGGACGTCTGGCTGCCTGCTGAAACCCTTGATCTGATTCGTGAATATCGCGTTGCTATCAAAGGCCCTCTGACCACTCCGGTTGGCGGCGGTATTCGTTCTCTTAACGTTGCCCTGCGTCAGGAGCTGGATCTTTACATCTGCCTGCGTCCGGTACGTTACTACCAGGGCACCCCAAGCCCGGTTAAACACCCTGAACTGACCGATATGGTTATCTTCCGTGAAAACTCGGAAGACATTTATGCGGGTATCGAATGGAAAGCTGACTCTGCCGACGCTGAGAAAGTGATCAAATTCCTGCGTGAAGA…	GGTGTAGCGCGTAAACCGGGTATGGATCGTTCCGACCTGTTTAACGTTAACGCCGGTATTGTGAAGAATCTGGTTCAGCAAGTTGCGAAAACTTGCCCGAAAGCGTGCATTGGCATTATCACTAACCCGGTTAACACCACTGTGGCTATCGCTGCGGAAGTGCTGAAAAAAGCCGGTGTTTATGACAAAAACAAGCTGTTTGGCGTTACTACGCTGGATATTATTCGTTCCAACACCTTTGTCGCGGAACTGAAAGGTAAACAACCGGGTGATGTAGAAGTGCCTGTTATTGGCGGTCACTCTGGCGTTACTATTCTGCCGCTGCTGTCACAGGTTCCTGGCGTCAGTTTTACCGAGCAGGAAGTCGCAGATCTGACCAAACGTATCCAGAACGCGGGC…	ATAACGCGCGTGAGAAAGCGCGTGGCGCGAAAGCGATCGGCACCACGGGGCGTGGTATCGGGCCTGCTTATGAAGATAAAGTAGCACGCCGCGGTCTGCGTGTTGGCGACCTTTTCGACAAAGAAACCTTCGCTGAAAAACTGAAAGAAGTGATGGAATATCACAACTTCCAGTTGGTTAACTACTACAAAGTTGAAGCGGTTGATTACCAGAAAGTTCTGGATGATGTGATGGCCGTTGCCGACATCCTGACTTCCATGGTGGTTGACGTTTCTGACCTGCTTGACCAGGCGCGTCAGCGTGGCGATTTCGTCATGTTTGAAGGTGCGCAGGGTACGCTTCTGGATATCGACCACGGTACTTATCCGTACGTAACCTCTTCCAACACCACTGCGGGTG…	TGCTCGTAAACTGGGCGTCGATATTGACAACCTGCTGTGTTCCCAGCCGGACACTGGCGAACAGGCGCTGGAAATCTGTGACGCCCTGGCGCGCTCTGGCGCAGTAGACGTTATCGTTGTTGACTCCGTAGCGGCACTGACGCCGAAAGCGGAAATCGAAGGTGAAATCGGCGACTCTCACATGGGCCTTGCGGCACGTATGATGAGCCAGGCGATGCGTAAGCTGGCGGGTAACCTGAAGCAGTCCAACACGCTGCTGATCTTCATCAACCAGATCCGTATGAAAATTGGTGTGATGTTCGGTAACCCGGAAACCACTACCGGTGGTAACGCGCTGAAATTCTACGCCTCTGTTCGTCTCGACATCCGTCGTATCGGCGCGGTGAAAGAGGGCGAAAA…
2882	GGGGAAAGGGACTCAGGCTCAGTTCATCATGGAGAAATATGGTATTCCGCAAATCTCCACAGGTGATATGCTGCGTGCTGCGGTCAAATCTGGCTCCGAGCTGGGTAAACAAGCAAAAGACATTATGGACGCTGGCAAACTGGTTACCGATGAACTGGTGATCGCGCTGGTTAAAGAACGTATTGCTCAGGAAGACTGCCGTAACGGTTTCCTGCTTGACGGCTTCCCGCGTACTATTCCGCAGGCTGACGCGATGAAAGAAGCGGGCATCAATGTTGATTACGTTCTGGAGTTCGACGTACCGGACGAACTGATTGTTGATCGTATTGTTGGTCGCCGCGTTCACGCGCCATCTGGCCGTGTTTATCACGTTAAATTCAATCCGCCGAAAGTAGAAGG…	CGAGAGCTATTCGCCAGGCGGCGGATGAAGTGCTGGCAGGGCAACATGATGATGAGTTCCCGCTGGCAATCTGGCAAACGGGATCTGGTACGCAAAGCAATATGAATATGAATGAAGTACTGGCTAACCGGGCCAGCGAATTGCTTGGCGGCGTACGCGGAATGGAACGTAAAGTTCACCCTAACGATGACGTGAACAAAAGCCAAAGCTCCAATGATGTCTTCCCAACTGCTATGCACGTGGCGGCGTTATTGGCACTGCGTAAGCAACTCATTCCTCAGCTCAAAAACCTCACTCAAACTCTGAATGAGAAATCGCGCGCATTTGCCGATATCGTCAAAATTGGTCGTACCCACTTGCAGGACGCCACACCGCTGACTCTGGGACAGGAGATTTCTG…	GGTCTGCACGGCGTTGGTGTTTCGGTAGTAAACGCCCTGTCGCAAAAACTGGAGCTGGTTATTCAGCGCGAGGGTAAAATTCACCGTCAGATCTACGAACACGGTGTTCCGCAGGCACCGCTGGCGGTTACTGGTGACACCGACAAAACCGGCACCATGGTGCGTTTCTGGCCAAGCCTTGAAACTTTCACCAATGTGACCGAGTTCGAATACGATATTCTGGCGAAGCGTCTGCGTGAGCTGTCCTTCCTCAATTCCGGCGTGTCTATTCGTCTGAAAGACAAACGTGACGGCAAAGAAGACCACTTCCACTATGAAGGCGGCATTAAGGCGTTCGTTGAATATCTGAACAAGAACAAAACGCCGATTCACCCGAACATCTTCTACTTCTCCACCGAA…	CGACGCTGCCGTCGAGAAAGCCTATAAAGGCGAGCGTAAAATCTCCTGGATGGAAATTTACACCGGTGAAAAATCCACACAGGTTTATGGTCAGGACGTCTGGTTGCCTGCTGAAACCCTTGATCTGATTCGTGAATATCGCGTTGCTATCAAAGGCCCTCTGACCACTCCGGTTGGCGGCGGTATTCGTTCTCTTAACGTTGCCCTGCGCCAGGAGCTGGATCTTTACATCTGCCTGCGTCCGGTACGTTACTACCAGGGCACCCCAAGCCCGGTTAAACACCCTGAACTGACCGATATGGTTATCTTCCGTGAAAACTCGGAAGACATTTATGCGGGTATCGAATGGAAAGCTGACTCTGCCGACGCTGAGAAAGTGATCAAATTCCTGCGTGAAGA…	GGTGTAGCGCGTAAACCGGGTATGGATCGTTCCGACCTGTTTAACGTTAACGCCGGTATTGTGAAGAATCTGGTTCAGCAAGTTGCGAAAACTTGCCCGAAAGCGTGCATTGGCATTATCACTAACCCGGTTAACACCACTGTGGCTATCGCTGCGGAAGTGCTGAAAAAAGCCGGTGTTTATGACAAAAACAAGCTGTTTGGCGTTACTACGCTGGATATTATTCGTTCCAACACCTTTGTCGCGGAACTGAAAGGTAAACAACCGGGTGATGTAGAAGTGCCGGTTATTGGCGGTCACTCTGGCGTTACTATTCTGCCGCTGCTGTCACAGGTTCCTGGCGTCAGTTTTACCGAGCAGGAAGTCGCAGATCTGACCAAACGTATCCAGAACGCGGGT…	ATAACGCGCGTGAGAAAGCGCGTGGCGCGAAAGCGATCGGCACCACGGGGCGTGGTATCGGGCCTGCTTATGAAGATAAAGTGGCACGTCGCGGTCTGCGTGTTGGCGACCTTTTCGACAAAGAAACCTTCGCTGAAAAACTGAAAGAAGTGATGGAATATCACAACTTCCAGTTGGTTAACTACTACAAAGTTGAAGCGGTTGATTACCAGAAAGTTCTGGATGATGTGATGGCCGTTGCCGACATCCTGACTTCCATGGTGGTTGACGTTTCTGACCTGCTCGATCAGGCGCGTCAGCGTGGCGATTTCGTCATGTTTGAAGGTGCGCAGGGTACGCTTCTGGATATCGACCACGGTACTTATCCGTACGTAACCTCTTCCAACACCACTGCGGGCG…	TGCTCGTAAACTGGGCGTCGATATCGACAACCTGCTGTGTTCCCAGCCGGACACTGGCGAACAGGCGCTGGAAATCTGTGACGCCCTGGCGCGCTCTGGCGCAGTAGATGTTATCGTTGTTGACTCCGTAGCGGCACTGACGCCGAAAGCGGAAATCGAAGGTGAAATCGGCGACTCTCACATGGGCCTTGCGGCACGTATGATGAGCCAGGCGATGCGTAAGCTGGCGGGTAACCTGAAGCAGTCCAACACGCTGCTGATCTTCATCAACCAGATCCGTATGAAAATTGGTGTGATGTTCGGTAACCCGGAAACCACTACCGGTGGTAACGCGCTGAAATTCTACGCCTCTGTTCGTCTCGACATCCGTCGTATCGGCGCGGTGAAAGAGGGCGAAAA…
2883	GGGGAAAGGGACTCAGGCTCAGTTCATCATGGAGAAATATGGTATTCCGCAAATCTCCACAGGTGATATGCTGCGTGCTGCGGTCAAATCTGGCTCCGAGCTGGGTAAACAAGCAAAAGACATTATGGACGCTGGCAAACTGGTTACCGATGAACTGGTGATCGCGCTGGTTAAAGAACGTATTGCTCAGGAAGACTGCCGTAACGGTTTCCTGCTTGACGGCTTCCCGCGTACTATTCCGCAGGCTGACGCGATGAAAGAAGCGGGCATCAATGTTGATTACGTTCTGGAGTTCGACGTACCGGACGAACTGATTGTTGATCGTATTGTTGGTCGCCGCGTTCACGCGCCATCTGGCCGTGTTTATCACGTTAAATTCAATCCGCCGAAAGTAGAAGG…	CGAGAGCTATTCGCCAGGCGGCGGATGAAGTGCTGGCAGGGCAACATGATGATGAGTTCCCGCTGGCAATCTGGCAAACGGGATCTGGTACGCAAAGCAATATGAATATGAATGAAGTACTGGCTAACCGGGCCAGCGAATTGCTTGGCGGCGTACGCGGAATGGAACGTAAAGTTCACCCTAACGATGACGTGAACAAAAGCCAAAGCTCCAATGATGTCTTCCCAACTGCTATGCACGTGGCGGCGTTATTGGCACTGCGTAAGCAACTCATTCCTCAGCTCAAAAACCTCACTCAAACTCTGAATGAGAAATCGCGCGCATTTGCCGATATCGTCAAAATTGGTCGTACCCACTTGCAGGACGCCACACCGCTGACTCTGGGACAGGAGATTTCTG…	GGTCTGCACGGCGTTGGTGTTTCGGTAGTAAACGCCCTGTCGCAAAAACTGGAGCTGGTTATTCAGCGCGAGGGTAAAATTCACCGTCAGATCTACGAACACGGTGTTCCGCAGGCACCGCTGGCGGTTACTGGTGACACCGACAAAACCGGCACCATGGTGCGTTTCTGGCCAAGCCTTGAAACTTTCACCAATGTGACCGAGTTCGAATACGATATTCTGGCGAAGCGTCTGCGTGAGCTGTCCTTCCTCAATTCCGGCGTGTCTATTCGTCTGAAAGACAAACGCGACGGCAAAGAAGACCACTTCCACTATGAAGGCGGCATTAAGGCGTTCGTTGAATATCTGAACAAGAACAAAACGCCGATTCACCCGAACATCTTCTACTTCTCCACCGAA…	CGATGCTGCCGTCGAGAAAGCCTATAAAGGTGAGCGTAAAATCTCCTGGATGGAAATTTACACCGGTGAAAAATCCACACAGGTTTATGGTCAGGACGTCTGGCTGCCTGCTGAAACCCTTGATCTGATTCGTGAATATCGCGTTGCTATCAAAGGCCCTCTGACCACTCCGGTTGGCGGCGGTATTCGTTCTCTTAACGTTGCCCTGCGCCAGGAGCTGGATCTTTACATCTGCCTGCGTCCGGTACGTTACTACCAGGGCACTCCAAGCCCGGTTAAACACCCTGAACTGACCGATATGGTTATCTTCCGTGAAAACTCGGAAGACATTTATGCGGGTATCGAATGGAAAGCTGACTCTGCCGACGCAGAGAAAGTGATTAAATTCCTGCGTGAAGA…	GGTGTAGCGCGTAAACCGGGTATGGATCGTTCCGACCTGTTTAACGTTAACGCCGGTATTGTGAAGAATCTGGTTCAGCAAGTTGCGAAAACTTGCCCGAAAGCGTGCATTGGCATTATCACTAACCCGGTTAACACCACTGTGGCTATCGCTGCGGAAGTGCTGAAAAAAGCCGGTGTTTATGACAAAAACAAGCTGTTTGGCGTTACTACGCTGGATATTATTCGTTCCAACACCTTTGTCGCGGAACTGAAAGGTAAACAACCGGGTGATGTAGAAGTGCCGGTTATTGGCGGTCACTCTGGCGTTACTATTCTGCCGCTGCTGTCACAGGTTCCTGGCGTCAGTTTTACCGAGCAGGAAGTCGCAGATCTGACCAAACGTATCCAGAACGCGGGT…	ATAACGCGCGTGAGAAAGCGCGTGGCGCGAAAGCGATCGGCACCACGGGGCGTGGTATCGGGCCTGCTTATGAAGATAAAGTGGCACGTCGCGGTCTGCGTGTTGGCGACCTTTTCGACAAAGAAACCTTCGCTGAAAAACTGAAAGAAGTGATGGAATATCACAACTTCCAGTTGGTTAACTACTACAAAGTTGAAGCGGTTGATTACCAGAAAGTTCTGGATGATGTGATGGCCGTTGCCGACATCCTGACTTCCATGGTGGTTGACGTTTCTGACCTGCTCGATCAGGCGCGTCAGCGTGGCGATTTCGTCATGTTTGAAGGTGCGCAGGGTACGCTTCTGGATATCGACCACGGTACTTATCCGTACGTAACCTCTTCCAACACCACTGCGGGTG…	TGCTCGTAAACTGGGCGTCGATATCGACAACCTGCTGTGTTCCCAGCCGGACACTGGCGAACAGGCGCTGGAAATCTGTGACGCCCTGGCGCGCTCTGGCGCAGTAGATGTTATCGTTGTTGACTCCGTAGCGGCACTGACGCCGAAAGCGGAAATCGAAGGTGAAATCGGCGACTCTCACATGGGCCTTGCGGCACGTATGATGAGCCAGGCGATGCGTAAGCTGGCGGGTAACCTGAAGCAGTCCAACACGCTGCTGATCTTCATCAACCAGATCCGTATGAAAATTGGTGTGATGTTCGGTAACCCGGAAACCACTACCGGTGGTAACGCGCTGAAATTCTACGCCTCTGTTCGTCTCGACATCCGTCGTATCGGCGCGGTGAAAGAGGGCGAAAA…
2885	GGGGAAAGGGACTCAGGCTCAGTTCATCATGGAGAAATATGGTATTCCGCAAATCTCCACAGGTGATATGCTGCGTGCTGCGGTCAAATCTGGCTCCGAGCTGGGTAAACAAGCAAAAGACATTATGGACGCTGGCAAACTGGTTACCGATGAACTGGTGATCGCGCTGGTTAAAGAACGTATTGCTCAGGAAGACTGCCGTAACGGTTTCCTGCTTGACGGCTTCCCGCGTACTATTCCGCAGGCTGACGCGATGAAAGAAGCGGGCATCAATGTTGATTACGTTCTGGAGTTCGACGTACCGGACGAACTGATTGTTGATCGTATTGTTGGTCGCCGCGTTCACGCGCCATCTGGCCGTGTTTATCACGTTAAATTCAATCCGCCGAAAGTAGAAGG…	CGAGAGCTATTCGCCAGGCGGCGGATGAAGTGCTGGCAGGGCAACATGATGATGAGTTCCCGCTGGCAATCTGGCAAACGGGATCTGGTACGCAAAGCAATATGAATATGAATGAAGTACTGGCTAACCGGGCCAGCGAATTGCTTGGCGGCGTACGCGGAATGGAACGTAAAGTTCACCCTAACGATGACGTGAACAAAAGCCAAAGCTCCAATGATGTCTTCCCAACTGCTATGCACGTGGCGGCGTTATTGGCACTGCGTAAGCAACTCATTCCTCAGCTCAAAAACCTCACTCAAACTCTGAATGAGAAATCGCGCGCATTTGCCGATATCGTCAAAATTGGTCGTACCCACTTGCAGGACGCCACACCGCTGACTCTGGGACAGGAGATTTCTG…	GGTCTGCACGGCGTTGGTGTTTCGGTAGTAAACGCCCTGTCGCAAAAACTGGAGCTGGTTATTCAGCGCGAGGGTAAAATTCACCGTCAGATCTACGAACACGGTGTTCCGCAGGCACCGCTGGCGGTTACTGGTGACACCGACAAAACCGGCACCATGGTGCGTTTCTGGCCAAGCCTTGAAACTTTCACCAATGTGACCGAGTTCGAATACGATATTCTGGCGAAGCGTCTGCGTGAGCTGTCCTTCCTCAATTCCGGCGTGTCTATTCGTCTGAAAGACAAACGCGACGGCAAAGAAGACCACTTCCACTATGAAGGCGGCATTAAGGCGTTCGTTGAATATCTGAACAAGAACAAAACGCCGATTCACCCGAACATCTTCTACTTCTCCACCGAA…	CGATGCTGCCGTCGAGAAAGCCTATAAAGGTGAGCGTAAAATCTCCTGGATGGAAATTTACACCGGTGAAAAATCCACACAGGTTTATGGTCAGGACGTCTGGCTGCCTGCTGAAACCCTTGATCTGATTCGTGAATATCGCGTTGCTATCAAAGGCCCTCTGACCACTCCGGTTGGCGGCGGTATTCGTTCTCTTAACGTTGCCCTGCGCCAGGAGCTGGATCTTTACATCTGCCTGCGTCCGGTACGTTACTACCAGGGCACTCCAAGCCCGGTTAAACACCCTGAACTGACCGATATGGTTATCTTCCGTGAAAACTCGGAAGACATTTATGCGGGTATCGAATGGAAAGCTGACTCTGCCGACGCAGAGAAAGTGATTAAATTCCTGCGTGAAGA…	GGTGTAGCGCGTAAACCGGGTATGGATCGTTCCGACCTGTTTAACGTTAACGCCGGTATTGTGAAGAATCTGGTTCAGCAAGTTGCGAAAACTTGCCCGAAAGCGTGCATTGGCATTATCACTAACCCGGTTAACACCACTGTGGCTATCGCTGCGGAAGTGCTGAAAAAAGCCGGTGTTTATGACAAAAACAAGCTGTTTGGCGTTACTACGCTGGATATTATTCGTTCCAACACCTTTGTCGCGGAACTGAAAGGTAAACAACCGGGTGATGTAGAAGTGCCGGTTATTGGCGGTCACTCTGGCGTTACTATTCTGCCGCTGCTGTCACAGGTTCCTGGCGTCAGTTTTACCGAGCAGGAAGTCGCAGATCTGACCAAACGTATCCAGAACGCGGGT…	ATAACGCGCGTGAGAAAGCGCGTGGCGCGAAAGCGATCGGCACCACGGGGCGTGGTATCGGGCCTGCTTATGAAGATAAAGTGGCACGTCGCGGTCTGCGTGTTGGCGACCTTTTCGACAAAGAAACCTTCGCTGAAAAACTGAAAGAAGTGATGGAATATCACAACTTCCAGTTGGTTAACTACTACAAAGTTGAAGCGGTTGATTACCAGAAAGTTCTGGATGATGTGATGGCCGTTGCCGACATCCTGACTTCCATGGTGGTTGACGTTTCTGACCTGCTCGATCAGGCGCGTCAGCGTGGCGATTTCGTCATGTTTGAAGGTGCGCAGGGTACGCTTCTGGATATCGACCACGGTACTTATCCGTACGTAACCTCTTCCAACACCACTGCGGGTG…	TGCTCGTAAACTGGGCGTCGATATCGACAACCTGCTGTGTTCCCAGCCGGACACTGGCGAACAGGCGCTGGAAATCTGTGACGCCCTGGCGCGCTCTGGCGCAGTAGATGTTATCGTTGTTGACTCCGTAGCGGCACTGACGCCGAAAGCGGAAATCGAAGGTGAAATCGGCGACTCTCACATGGGCCTTGCGGCACGTATGATGAGCCAGGCGATGCGTAAGCTGGCGGGTAACCTGAAGCAGTCCAACACGCTGCTGATCTTCATCAACCAGATCCGTATGAAAATTGGTGTGATGTTCGGTAACCCGGAAACCACTACCGGTGGTAACGCGCTGAAATTCTACGCCTCTGTTCGTCTCGACATCCGTCGTATCGGCGCGGTGAAAGAGGGCGAAAA…
2887	GGGGAAAGGGACTCAGGCTCAGTTCATCATGGAGAAATATGGTATTCCGCAAATCTCCACAGGTGATATGCTGCGTGCCGCAGTCAAATCTGGCTCCGAGCTGGGTAAACAAGCAAAAGACATTATGGACGCTGGCAAACTGGTTACCGATGAACTGGTGATCGCGCTGGTTAAAGAACGTATTGCTCAGGAAGACTGCCGTAACGGTTTCCTGCTTGACGGCTTCCCGCGTACTATTCCGCAGGCTGACGCGATGAAAGAAGCGGGCATCAATGTTGATTACGTTCTGGAGTTCGACGTACCGGACGAACTGATTGTTGATCGTATTGTTGGTCGTCGCGTTCACGCGCCATCTGGCCGTGTTTATCACGTTAAATTCAATCCGCCGAAAGTAGAAGG…	CGAGAGCCATTCGCCAGGCGGCGGATGAAGTGCTGGCAGGGCAACATGATGATGAGTTCCCGCTGGCAATCTGGCAAACGGGATCTGGTACGCAAAGCAATATGAATATGAATGAAGTACTGGCTAACCGGGCCAGCGAATTGCTTGGCGGCGTACGCGGAATGGAACGTAAAGTTCACCCTAACGATGACGTGAACAAAAGCCAAAGCTCCAATGATGTCTTCCCAACTGCTATGCACGTGGCGGCGTTATTGGCACTGCGTAAGCAACTCATTCCTCAGCTCAAAAACCTCACTCAAACTCTGAATGAGAAATCGCGCGCATTTGCCGATATCGTCAAAATTGGTCGTACCCACTTGCAGGACGCCACACCGCTGACCCTGGGACAGGAGATTTCTG…	GGTCTGCACGGCGTTGGTGTTTCGGTAGTAAACGCCCTGTCGCAAAAACTGGAGCTGGTTATTCAGCGCGAGGGTAAAATTCACCGTCAGATCTACGAACACGGTGTTCCGCAGGCACCGCTGGCGGTTACTGGTGACACCGACAAAACCGGCACCATGGTGCGTTTCTGGCCAAGCCTTGAAACTTTCACCAATGTGACCGAGTTCGAATACGATATTCTGGCGAAGCGTCTGCGTGAGCTGTCCTTCCTCAATTCCGGCGTGTCTATTCGTCTGAAAGACAAACGCGACGGCAAAGAAGACCACTTCCACTATGAAGGCGGCATTAAGGCGTTCGTTGAATATCTGAACAAGAACAAAACGCCGATTCACCCGAACATCTTCTACTTCTCCACCGAA…	CGATGCTGCCGTCGAGAAAGCCTATAAAGGTGAGCGTAAAATCTCCTGGATGGAAATTTACACCGGTGAAAAATCCACACAGGTTTATGGTCAGGACGTCTGGCTGCCTGCTGAAACCCTTGATCTGATTCGTGAATATCGCGTTGCTATCAAAGGCCCTCTGACCACTCCGGTTGGCGGCGGTATTCGTTCTCTTAACGTTGCCCTGCGTCAGGAGCTGGATCTTTACATCTGCCTGCGTCCGGTACGTTACTACCAGGGCACCCCAAGCCCGGTTAAACACCCTGAACTGACCGATATGGTTATCTTCCGTGAAAACTCGGAAGACATTTATGCGGGTATCGAATGGAAAGCTGACTCTGCCGACGCTGAGAAAGTGATCAAATTCCTGCGTGAAGA…	GGTGTAGCGCGTAAACCGGGTATGGATCGTTCCGACCTGTTTAACGTTAACGCCGGTATTGTGAAGAATCTGGTTCAGCAAGTTGCGAAAACTTGCCCGAAAGCGTGCATTGGCATTATCACTAACCCGGTTAACACCACTGTGGCTATCGCTGCGGAAGTGCTGAAAAAAGCCGGTGTTTATGACAAAAACAAGCTGTTTGGCGTTACTACGCTGGATATTATTCGTTCCAACACCTTTGTCGCGGAACTGAAAGGTAAACAACCGGGTGATGTAGAAGTGCCTGTTATTGGCGGTCACTCTGGCGTTACTATTCTGCCGCTGCTGTCACAGGTTCCTGGCGTCAGTTTTACCGAGCAGGAAGTCGCAGATCTGACCAAACGTATCCAGAACGCGGGC…	ATAACGCGCGTGAGAAAGCGCGTGGCGCGAAAGCGATCGGCACCACGGGGCGTGGTATCGGGCCTGCTTATGAAGATAAAGTAGCACGCCGCGGTCTGCGTGTTGGCGACCTTTTCGACAAAGAAACCTTCGCTGAAAAACTGAAAGAAGTGATGGAATATCACAACTTCCAGTTGGTTAACTACTACAAAGTTGAAGCGGTTGATTACCAGAAAGTTCTGGATGATGTGATGGCCGTTGCCGACATCCTGACTTCCATGGTGGTTGACGTTTCTGACCTGCTTGACCAGGCGCGTCAGCGTGGCGATTTCGTCATGTTTGAAGGTGCGCAGGGTACGCTTCTGGATATCGACCACGGTACTTATCCGTACGTAACCTCTTCCAACACCACTGCGGGTG…	TGCTCGTAAACTGGGCGTCGATATTGACAACCTGCTGTGTTCCCAGCCGGACACTGGCGAACAGGCGCTGGAAATCTGTGACGCCCTGGCGCGCTCTGGCGCAGTAGACGTTATCGTTGTTGACTCCGTAGCGGCACTGACGCCGAAAGCGGAAATCGAAGGTGAAATCGGCGACTCTCACATGGGCCTTGCGGCACGTATGATGAGCCAGGCGATGCGTAAGCTGGCGGGTAACCTGAAGCAGTCCAACACGCTGCTGATCTTCATCAACCAGATCCGTATGAAAATTGGTGTGATGTTCGGTAACCCGGAAACCACTACCGGTGGTAACGCGCTGAAATTCTACGCCTCTGTTCGTCTCGACATCCGTCGTATCGGCGCGGTGAAAGAGGGCGAAAA…
2888	GGGGAAAGGGACTCAGGCTCAGTTCATCATGGAGAAATATGGTATTCCGCAAATCTCCACAGGTGATATGCTGCGTGCCGCAGTCAAATCTGGCTCCGAGCTGGGTAAACAAGCAAAAGACATTATGGACGCTGGCAAACTGGTTACCGATGAACTGGTGATCGCGCTGGTTAAAGAACGTATTGCTCAGGAAGACTGCCGTAACGGTTTCCTGCTTGACGGCTTCCCGCGTACTATTCCGCAGGCTGACGCGATGAAAGAAGCGGGCATCAATGTTGATTACGTTCTGGAGTTCGACGTACCGGACGAACTGATTGTTGATCGTATTGTTGGTCGCCGCGTTCACGCGCCATCTGGCCGTGTTTATCACGTTAAATTTAATCCGCCGAAAGTAGAAGG…	CGAGAGCCATTCGCCAGGCGGCGGATGAAGTGCTGGCAGGGCAACATGATGATGAGTTCCCGCTGGCAATCTGGCAAACGGGATCCGGTACGCAAAGCAATATGAATATGAATGAAGTACTGGCTAATCGGGCCAGCGAATTGCTTGGCGGTGTACGCGGAATGGAACGTAAAGTTCACCCTAACGATGACGTGAACAAAAGCCAAAGCTCCAATGATGTCTTCCCAACTGCTATGCACGTAGCGGCGTTATTGGCACTGCGTAAGCAACTCATTCCTCAGCTCAAAAACCTCACTCAAACTCTGAATGAGAAATCGCGCGCATTTGCCGATATCGTCAAAATTGGTCGTACCCACTTGCAGGACGCCACACCGCTGACCCTGGGACAGGAGATTTCTG…	GGTCTGCACGGCGTTGGTGTTTCGGTAGTAAACGCCCTGTCGCAAAAACTGGAGCTGGTTATTCAGCGCGAGGGTAAAATTCACCGTCAGATCTACGAACACGGTGTTCCGCAGGCACCGCTGGCGGTTACTGGTGACACCGACAAAACCGGCACCATGGTGCGTTTCTGGCCAAGCCTTGAAACTTTCACCAATGTGACCGAGTTCGAATACGATATTCTGGCGAAGCGTCTGCGTGAGCTGTCCTTCCTCAACTCCGGCGTGTCTATTCGTCTGAAAGACAAACGCGACGGCAAAGAAGACCACTTCCACTATGAAGGCGGCATTAAGGCGTTCGTTGAATATCTGAACAAGAACAAAACGCCGATTCACCCGAACATCTTCTACTTCTCCACCGAA…	CGACGCTGCAGTCGAGAAAGCCTATAAAGGCGAGCGTAAAATCTCCTGGATGGAAATTTACACCGGTGAAAAATCCACACAGGTTTATGGTCAGGATGTCTGGTTGCCTGCTGAAACCCTTGATCTGATTCGTGAATATCGCGTTGCTATCAAAGGCCCTCTGACCACTCCGGTTGGCGGCGGTATTCGTTCTCTTAACGTTGCCCTGCGCCAGGAGCTGGATCTTTACATCTGCCTGCGTCCGGTACGTTACTACCAGGGCACCCCAAGCCCGGTTAAACACCCTGAACTGACCGATATGGTTATCTTCCGTGAAAACTCGGAAGACATTTATGCGGGTATCGAATGGAAAGCTGACTCTGCCGACGCAGAGAAAGTGATTAAATTCCTGCGTGAAGA…	GGTGTAGCGCGTAAACCGGGTATGGATCGTTCCGACCTGTTTAACGTTAACGCCGGTATTGTGAAGAATCTGGTTCAGCAAGTTGCGAAAACTTGCCCGAAAGCGTGCATTGGCATTATCACTAACCCGGTTAACACCACTGTGGCTATCGCTGCGGAAGTGCTGAAAAAAGCCGGTGTTTATGACAAAAACAAGCTGTTTGGCGTTACTACGCTGGATATTATTCGTTCCAACACCTTTGTCGCGGAACTGAAAGGTAAACAACCGGGTGATGTAGAAGTGCCTGTTATTGGCGGTCACTCTGGCGTTACTATTCTGCCGCTGCTGTCACAGGTTCCTGGCGTCAGTTTTACCGAGCAGGAAGTCGCAGATCTGACCAAACGTATCCAGAACGCGGGC…	ATAACGCGCGTGAGAAAGCGCGTGGCGCGAAAGCGATCGGCACCACGGGGCGTGGTATCGGACCTGCTTATGAAGATAAAGTGGCACGTCGCGGTCTGCGTGTTGGCGACCTTTTCGACAAAGAAACCTTCGCTGAAAAACTGAAAGAAGTGATGGAATATCACAACTTCCAGTTGGTTAACTACTACAAAGTTGAAGCGGTTGATTACCAGAAAGTTCTGGATGATGTGATGGCCGTTGCCGACATCCTGACTTCCATGGTGGTTGACGTTTCTGACCTGCTTGACCAGGCGCGTCAGCGTGGCGATTTCGTCATGTTTGAAGGTGCGCAGGGTACGCTTCTGGATATCGACCACGGTACTTATCCGTACGTAACCTCTTCCAACACCACTGCGGGTG…	TGCTCGTAAACTGGGCGTCGATATCGACAACCTGCTGTGTTCCCAGCCGGACACTGGCGAACAGGCGCTGGAAATCTGTGACGCCCTGGCGCGCTCTGGCGCAGTAGACGTTATCGTTGTTGACTCCGTAGCGGCACTGACGCCGAAAGCGGAAATCGAAGGTGAAATCGGCGACTCTCACATGGGCCTTGCGGCACGTATGATGAGCCAGGCGATGCGTAAGCTGGCGGGTAACCTGAAGCAGTCCAACACGCTGCTGATCTTCATCAACCAGATCCGTATGAAAATTGGTGTGATGTTCGGTAACCCGGAAACCACTACCGGTGGTAACGCGCTGAAATTCTACGCCTCTGTTCGTCTCGACATCCGTCGTATCGGCGCGGTGAAAGAGGGCGAAAA…
2892	GGGGAAAGGGACTCAGGCTCAGTTCATCATGGAGAAATATGGTATTCCGCAAATCTCCACAGGTGATATGCTGCGTGCCGCAGTCAAATCTGGCTCCGAGCTGGGTAAACAAGCAAAAGACATTATGGACGCTGGCAAACTGGTTACCGATGAACTGGTGATCGCGCTGGTTAAAGAACGTATTGCTCAGGAAGACTGCCGTAACGGTTTTCTGCTTGACGGCTTCCCGCGTACTATTCCGCAGGCTGACGCGATGAAAGAAGCGGGCATCAATGTTGATTACGTTCTGGAGTTCGACGTACCGGACGAACTGATTGTTGATCGTATTGTTGGTCGCCGCGTTCACGCGCCATCTGGCCGTGTTTATCACGTTAAATTCAATCCGCCGAAAGTAGAAGG…	CGAGAGCCATTCGCCAGGCGGCGGATGAAGTGCTGGCAGGGCAACATGATGATGAGTTCCCGCTGGCAATCTGGCAAACGGGATCCGGTACGCAAAGCAATATGAATATGAATGAAGTACTGGCTAATCGGGCCAGCGAATTGCTTGGCGGCGTACGCGGAATGGAACGTAAAGTTCACCCTAACGATGACGTGAACAAAAGCCAAAGCTCCAATGATGTCTTCCCAACTGCTATGCACGTGGCGGCGTTATTGGCACTGCGTAAGCAACTCATTCCTCAGCTCAAAAACCTCACTCAAACTCTGAATGAGAAATCGCGCGCATTTGCCGATATCGTCAAAATTGGTCGTACCCACTTGCAGGACGCCACACCGCTGACCCTGGGACAGGAGATTTCTG…	GGTCTGCACGGCGTTGGTGTTTCGGTAGTAAACGCCCTGTCGCAAAAACTGGAGCTGGTTATTCAGCGCGAGGGTAAAATTCACCGTCAGATCTACGAACACGGTGTTCCGCAGGCACCGCTGGCGGTTACTGGTGACACCGACAAAACCGGCACCATGGTGCGTTTCTGGCCAAGCCTTGAAACTTTCACCAATGTGACCGAGTTCGAATACGATATTCTGGCGAAGCGTCTGCGTGAGCTGTCCTTCCTCAATTCCGGCGTGTCTATTCGTCTGAAAGACAAACGCGACGGCAAAGAAGACCACTTCCATTATGAAGGCGGCATTAAGGCGTTCGTTGAATATCTGAACAAGAACAAAACGCCGATTCACCCGAACATCTTCTACTTCTCCACCGAA…	CGACGCTGCCGTCGAGAAAGCCTATAAAGGTGAGCGTAAAATCTCCTGGATGGAAATTTACACCGGTGAAAAATCCACACAGGTTTATGGTCAGGACGTCTGGCTGCCTGCTGAAACCCTTGATCTGATTCGTGAATATCGCGTTGCTATCAAAGGCCCGCTGACCACTCCGGTTGGCGGCGGTATTCGTTCTCTTAACGTTGCCCTGCGCCAGGAGCTGGATCTTTACATCTGCCTGCGTCCGGTACGTTACTACCAGGGCACCCCAAGCCCGGTTAAACACCCTGAACTGACCGATATGGTTATCTTCCGTGAAAACTCGGAAGACATTTATGCGGGTATCGAATGGAAAGCTGACTCTGCCGACGCTGAGAAAGTGATTAAATTCCTGCGTGAAGA…	GGTGTAGCGCGTAAACCGGGTATGGATCGTTCCGACCTGTTTAACGTTAACGCCGGTATTGTAAAGAATCTGGTTCAGCAAGTTGCGAAAACTTGCCCGAAAGCGTGCATTGGCATTATCACTAACCCGGTTAACACCACTGTGGCTATCGCTGCGGAAGTGCTGAAAAAAGCCGGTGTTTATGACAAAAACAAGCTGTTTGGCGTTACTACGCTGGATATTATTCGTTCCAACACCTTTGTCGCGGAACTGAAAGGTAAACAACCGGGTGATGTAGAAGTGCCGGTTATTGGCGGTCACTCTGGCGTTACTATTCTGCCGCTGCTGTCACAGGTTCCTGGCATCAGTTTTACCGAGCAGGAAGTCGCAGATCTGACCAAACGTATCCAGAACGCGGGC…	ATAACGCGCGTGAGAAAGCGCGTGGCGCGAAAGCGATCGGCACCACGGGGCGTGGTATCGGGCCTGCTTATGAAGATAAAGTGGCACGTCGCGGTCTGCGTGTTGGCGACCTTTTCGACAAAGAAACCTTCGCTGAAAAACTGAAAGAAGTGATGGAATATCACAACTTCCAGTTGGTTAACTACTACAAAGTTGAAGCGGTTGATTACCAGAAAGTTCTGGATGATGTGATGGCCGTTGCCGACATCCTGACTTCCATGGTGGTTGACGTTTCTGACCTGCTCGATCAGGCGCGTCAGCGTGGCGATTTCGTCATGTTTGAAGGTGCGCAGGGTACGCTTCTGGATATCGACCACGGTACTTATCCGTACGTAACCTCTTCCAACACCACTGCGGGTG…	TGCTCGTAAACTGGGCGTCGATATCGACAACCTGCTGTGTTCCCAGCCGGACACTGGCGAACAGGCGCTGGAAATCTGTGACGCCCTGGCGCGCTCTGGCGCAGTAGATGTTATCGTTGTTGACTCCGTAGCGGCACTGACGCCGAAAGCGGAAATCGAAGGTGAAATCGGCGACTCTCACATGGGCCTTGCGGCACGTATGATGAGCCAGGCGATGCGTAAGCTGGCGGGTAACCTGAAGCAGTCCAACACGCTGCTGATCTTCATCAACCAGATCCGTATGAAAATTGGTGTGATGTTCGGTAACCCGGAAACCACTACCGGTGGTAACGCGCTGAAATTCTACGCCTCTGTTCGTCTCGACATCCGTCGTATCGGCGCGGTGAAAGAGGGCGAAAA…
2898	GGGGAAAGGGACTCAGGCTCAGTTCATCATGGAGAAATATGGTATTCCGCAAATCTCCACAGGTGATATGCTGCGTGCTGCGGTCAAATCTGGCTCCGAGCTGGGTAAACAAGCAAAAGACATTATGGACGCTGGCAAACTGGTTACCGATGAACTGGTGATCGCGCTGGTTAAAGAACGTATTGCTCAGGAAGACTGCCGTAACGGTTTCCTGCTTGACGGCTTCCCGCGTACTATTCCGCAGGCTGACGCGATGAAAGAAGCGGGCATCAATGTTGATTACGTTCTGGAGTTCGACGTACCGGACGAACTGATTGTTGATCGTATTGTTGGTCGCCGCGTTCACGCGCCATCTGGCCGTGTTTATCACGTTAAATTCAATCCGCCGAAAGTAGAAGG…	CGAGAGCTATTCGCCAGGCGGCGGATGAAGTGCTGGCAGGGCAACATGATGATGAGTTCCCGCTGGCAATCTGGCAAACGGGATCTGGTACGCAAAGCAATATGAATATGAATGAAGTACTGGCTAACCGGGCCAGCGAATTGCTTGGCGGCGTACGCGGAATGGAACGTAAAGTTCACCCTAACGATGACGTGAACAAAAGCCAAAGCTCCAATGATGTCTTCCCAACTGCTATGCACGTGGCGGCGTTATTGGCACTGCGTAAGCAACTCATTCCTCAGCTCAAAAACCTCACTCAAACTCTGAATGAGAAATCGCGCGCATTTGCCGATATCGTCAAAATTGGTCGTACCCACTTGCAGGACGCCACACCGCTGGCTCTGGGACAGGAGATTTCTG…	GGTCTGCACGGCGTTGGTGTTTCGGTAGTAAACGCCCTGTCGCAAAAACTGGAGCTGGTTATTCAGCGCGAGGGTAAAATTCACCGTCAGATCTACGAACACGGTGTTCCGCAGGCACCGCTGGCGGTTACTGGTGACACCGACAAAACCGGCACCATGGTGCGTTTCTGGCCAAGCCTTGAAACTTTCACCAATGTGACCGAGTTCGAATACGATATTCTGGCGAAGCGTCTGCGTGAGCTGTCCTTCCTCAATTCCGGCGTGTCTATTCGTCTGAAAGACAAACGCGACGGCAAAGAAGACCACTTCCACTATGAAGGCGGCATTAAGGCGTTCGTTGAATATCTGAACAAGAACAAAACGCCGATTCACCCGAACATCTTCTACTTCTCCACCGAA…	CGACGCTGCCGTCGAGAAAGCCTATAAAGGCGAGCGTAAAATCTCCTGGATGGAAATTTACACCGGTGAAAAATCCACACAGGTTTATGGTCAGGACGTCTGGTTGCCTGCTGAAACCCTTGATCTGATTCGTGAATATCGCGTTGCTATCAAAGGCCCTCTGACCACTCCGGTTGGCGGCGGTATTCGTTCTCTTAACGTTGCCCTGCGCCAGGAGCTGGATCTTTACATCTGCCTGCGTCCGGTACGTTACTACCAGGGCACCCCAAGCCCGGTTAAACACCCTGAACTGACCGATATGGTTATCTTCCGTGAAAACTCGGAAGACATTTATGCGGGTATCGAATGGAAAGCTGACTCTGCCGACGCTGAGAAAGTGATCAAATTCCTGCGTGAAGA…	GGTGTAGCGCGTAAACCGGGTATGGATCGTTCCGACCTGTTTAACGTTAACGCCGGTATTGTGAAGAATCTGGTTCAGCAAGTTGCGAAAACTTGCCCGAAAGCGTGCATTGGCATTATCACTAACCCGGTTAACACCACTGTGGCTATCGCTGCGGAAGTGCTGAAAAAAGCCGGTGTTTATGACAAAAACAAGCTGTTTGGCGTTACTACGCTGGATATTATTCGTTCCAACACCTTTGTCGCGGAACTGAAAGGTAAACAACCGGGTGATGTAGAAGTGCCGGTTATTGGCGGTCACTCTGGCGTTACTATTCTGCCGCTGCTGTCACAGGTTCCTGGCGTCAGTTTTACCGAGCAGGAAGTCGCAGATCTGACCAAACGTATCCAGAACGCGGGT…	ATAACGCGCGTGAGAAAGCGCGTGGCGCGAAAGCGATCGGCACCACGGGGCGTGGTATCGGGCCTGCTTATGAAGATAAAGTGGCACGTCGCGGTCTGCGTGTTGGCGACCTTTTCGACAAAGAAACCTTCGCTGAAAAACTGAAAGAAGTGATGGAATATCACAACTTCCAGTTGGTTAACTACTACAAAGTTGAAGCGGTTGATTACCAGAAAGTTCTGGATGATGTGATGGCCGTTGCCGACATCCTGACTTCCATGGTGGTTGACGTTTCTGACCTGCTCGATCAGGCGCGTCAGCGTGGCGATTTCGTCATGTTTGAAGGTGCGCAGGGTACGCTTCTGGATATCGACCACGGTACTTATCCGTACGTAACCTCTTCCAACACCACTGCGGGTG…	TGCTCGTAAACTGGGCGTCGATATCGACAACCTGCTGTGTTCCCAGCCGGACACTGGCGAACAGGCGCTGGAAATCTGTGACGCCCTGGCGCGCTCTGGCGCAGTAGATGTTATCGTTGTTGACTCCGTAGCGGCACTGACGCCGAAAGCGGAAATCGAAGGTGAAATCGGCGACTCTCACATGGGCCTTGCGGCACGTATGATGAGCCAGGCGATGCGTAAGCTGGCGGGTAACCTGAAGCAGTCCAACACGCTGCTGATCTTCATCAACCAGATCCGTATGAAAATTGGTGTGATGTTCGGTAACCCGGAAACCACTACCGGTGGTAACGCGCTGAAATTCTACGCCTCTGTTCGTCTCGACATCCGTCGTATCGGCGCGGTGAAAGAGGGCGAAAA…
2899	GGGGAAAGGGACTCAGGCTCAGTTCATCATGGAGAAATATGGTATTCCGCAAATCTCCACAGGTGATATGCTGCGTGCTGCGGTCAAATCTGGCTCCGAGCTGGGTAAACAAGCAAAAGACATTATGGACGCTGGCAAACTGGTTACCGATGAACTGGTGATCGCGCTGGTTAAAGAACGTATTGCTCAGGAAGACTGCCGTAACGGTTTCCTGCTTGACGGCTTCCCGCGTACTATTCCGCAGGCTGACGCGATGAAAGAAGCGGGCATCAATGTTGATTACGTTCTGGAGTTCGACGTACCGGACGAACTGATTGTTGATCGTATTGTTGGTCGCCGCGTTCACGCGCCATCTGGCCGTGTTTATCACGTTAAATTCAATCCGCCGAAAGTAGAAGG…	CGAGAGCTATTCGCCAGGCGGCGGATGAAGTGCTGGCAGGGCAACATGATGATGAGTTCCCGCTGGCAATCTGGCAAACGGGATCTGGTACGCAAAGCAATATGAATATGAATGAAGTACTGGCTAACCGGGCCAGCGAATTGCTTGGCGGCGTACGCGGAATGGAACGTAAAGTTCACCCTAACGATGACGTGAACAAAAGCCAAAGCTCCAATGATGTCTTCCCAACTGCTATGCACGTGGCGGCGTTATTGGCACTGCGTAAGCAACTCATTCCTCAGCTCAAAAACCTCACTCAAACTCTGAATGAGAAATCGCGCGCATTTGCCGATATCGTCAAAATTGGTCGTACCCACTTGCAGGACGCCACACCGCTGGCTCTGGGACAGGAGATTTCTG…	GGTCTGCACGGCGTTGGTGTTTCGGTAGTAAACGCCCTGTCGCAAAAACTGGAGCTGGTTATTCAGCGCGAGGGTAAAATTCACCGTCAGATCTACGAACACGGTGTTCCGCAGGCACCGCTGGCGGTTACTGGTGACACCGACAAAACCGGCACCATGGTGCGTTTCTGGCCAAGCCTTGAAACTTTCACCAATGTGACCGAGTTCGAATACGATATTCTGGCGAAGCGTCTGCGTGAGCTGTCCTTCCTCAATTCCGGCGTGTCTATTCGTCTGAAAGACAAACGCGACGGCAAAGAAGACCACTTCCACTATGAAGGCGGCATTAAGGCGTTCGTTGAATATCTGAACAAGAACAAAACGCCGATTCACCCGAACATCTTCTACTTCTCCACCGAA…	CGACGCTGCCGTCGAGAAAGCCTATAAAGGCGAGCGTAAAATCTCCTGGATGGAAATTTACACCGGTGAAAAATCCACACAGGTTTATGGTCAGGACGTCTGGTTGCCTGCTGAAACCCTTGATCTGATTCGTGAATATCGCGTTGCTATCAAAGGCCCTCTGACCACTCCGGTTGGCGGCGGTATTCGTTCTCTTAACGTTGCCCTGCGCCAGGAGCTGGATCTTTACATCTGCCTGCGTCCGGTACGTTACTACCAGGGCACCCCAAGCCCGGTTAAACACCCTGAACTGACCGATATGGTTATCTTCCGTGAAAACTCGGAAGACATTTATGCGGGTATCGAATGGAAAGCTGACTCTGCCGACGCTGAGAAAGTGATCAAATTCCTGCGTGAAGA…	GGTGTAGCGCGTAAACCGGGTATGGATCGTTCCGACCTGTTTAACGTTAACGCCGGTATTGTGAAGAATCTGGTTCAGCAAGTTGCGAAAACTTGCCCGAAAGCGTGCATTGGCATTATCACTAACCCGGTTAACACCACTGTGGCTATCGCTGCGGAAGTGCTGAAAAAAGCCGGTGTTTATGACAAAAACAAGCTGTTTGGCGTTACTACGCTGGATATTATTCGTTCCAACACCTTTGTCGCGGAACTGAAAGGTAAACAACCGGGTGATGTAGAAGTGCCGGTTATTGGCGGTCACTCTGGCGTTACTATTCTGCCGCTGCTGTCACAGGTTCCTGGCGTCAGTTTTACCGAGCAGGAAGTCGCAGATCTGACCAAACGTATCCAGAACGCGGGT…	ATAACGCGCGTGAGAAAGCGCGTGGCGCGAAAGCGATCGGCACCACGGGGCGTGGTATCGGGCCTGCTTATGAAGATAAAGTGGCACGTCGCGGTCTGCGTGTTGGCGACCTTTTCGACAAAGAAACCTTCGCTGAAAAACTGAAAGAAGTGATGGAATATCACAACTTCCAGTTGGTTAACTACTACAAAGTTGAAGCGGTTGATTACCAGAAAGTTCTGGATGATGTGATGGCCGTTGCCGACATCCTGACTTCCATGGTGGTTGACGTTTCTGACCTGCTCGATCAGGCGCGTCAGCGTGGCGATTTCGTCATGTTTGAAGGTGCGCAGGGTACGCTTCTGGATATCGACCACGGTACTTATCCGTACGTAACCTCTTCCAACACCACTGCGGGTG…	TGCTCGTAAACTGGGCGTCGATATCGACAACCTGCTGTGTTCCCAGCCGGACACTGGCGAACAGGCGCTGGAAATCTGTGACGCCCTGGCGCGCTCTGGCGCAGTAGATGTTATCGTTGTTGACTCCGTAGCGGCACTGACGCCGAAAGCGGAAATCGAAGGTGAAATCGGCGACTCTCACATGGGCCTTGCGGCACGTATGATGAGCCAGGCGATGCGTAAGCTGGCGGGTAACCTGAAGCAGTCCAACACGCTGCTGATCTTCATCAACCAGATCCGTATGAAAATTGGTGTGATGTTCGGTAACCCGGAAACCACTACCGGTGGTAACGCGCTGAAATTCTACGCCTCTGTTCGTCTCGACATCCGTCGTATCGGCGCGGTGAAAGAGGGCGAAAA…
3217	GGGGAAAGGGACTCAGGCTCAGTTCATCATGGAGAAATATGGTATTCCGCAAATCTCCACAGGTGATATGCTGCGTGCTGCGGTCAAATCTGGCTCCGAGCTGGGTAAACAAGCAAAAGACATTATGGACGCTGGCAAACTGGTTACCGATGAACTGGTGATCGCGCTGGTTAAAGAACGTATTGCTCAGGAAGACTGCCGTAACGGTTTCCTGCTTGACGGCTTCCCGCGTACTATTCCGCAGGCTGACGCGATGAAAGAAGCGGGCATCAATGTTGATTACGTTCTGGAGTTCGACGTACCGGACGAACTGATTGTTGATCGTATTGTTGGTCGCCGCGTTCACGCGCCATCTGGCCGTGTTTATCACGTTAAATTCAATCCGCCGAAAGTAGAAGG…	CGAGAGCTATTCGCCAGGCGGCGGATGAAGTGCTGGCAGGGCAACATGATGATGAGTTCCCGCTGGCAATCTGGCAAACGGGATCTGGTACGCAAAGCAATATGAATATGAATGAAGTACTGGCTAACCGGGCCAGCGAATTGCTTGGCGGCGTACGCGGAATGGAACGTAAAGTTCACCCTAACGATGACGTGAACAAAAGCCAAAGCTCCAATGATGTCTTCCCAACTGCTATGCACGTGGCGGCGTTATTGGCACTGCGTAAGCAACTCATTCCTCAGCTCAAAAACCTCACTCAAACTCTGAATGAGAAATCGCGCGCATTTGCCGATATCGTCAAAATTGGTCGTACCCACTTGCAGGACGCCACACCGCTGACTCTGGGACAGGAGATTTCTG…	GGTCTGCACGGCGTTGGTGTTTCGGTAGTAAACGCCCTGTCGCAAAAACTGGAGCTGGTTATTCAGCGCGAGGGTAAAATTCACCGTCAGATCTACGAACACGGTGTTCCGCAGGCACCGCTGGCGGTTACTGGTGACACCGACAAAACCGGCACCATGGTGCGTTTCTGGCCAAGCCTTGAAACTTTCACCAATGTGACCGAGTTCGAATACGATATTCTGGCGAAGCGTCTGCGTGAGCTGTCCTTCCTCAATTCCGGCGTGTCTATTCGTCTGAAAGACAAACGCGACGGCAAAGAAGACCACTTCCACTATGAAGGCGGCATTAAGGCGTTCGTTGAATATCTGAACAAGAACAAAACGCCGATTCACCCGAACATCTTCTACTTCTCCACCGAA…	CGACGCTGCCGTCGAGAAAGCCTATAAAGGCGAGCGTAAAATCTCCTGGATGGAAATTTACACCGGTGAAAAATCCACACAGGTTTATGGTCAGGACGTCTGGTTGCCTGCTGAAACCCTTGATCTGATTCGTGAATATCGCGTTGCTATCAAAGGCCCTCTGACCACTCCGGTTGGCGGCGGTATTCGTTCTCTTAACGTTGCCCTGCGCCAGGAGCTGGATCTTTACATCTGCCTGCGTCCGGTACGTTACTACCAGGGCACCCCAAGCCCGGTTAAACACCCTGAACTGACCGATATGGTTATCTTCCGTGAAAACTCGGAAGACATTTATGCGGGTATCGAATGGAAAGCTGACTCTGCCGACGCTGAGAAAGTGATCAAATTCCTGCGTGAAGA…	GGTGTAGCGCGTAAACCGGGTATGGATCGTTCCGACCTGTTTAACGTTAACGCCGGTATTGTGAAGAATCTGGTTCAGCAAGTTGCGAAAACTTGCCCGAAAGCGTGCATTGGCATTATCACTAACCCGGTTAACACCACTGTGGCTATCGCTGCGGAAGTGCTGAAAAAAGCCGGTGTTTATGACAAAAACAAGCTGTTTGGCGTTACTACGCTGGATATTATTCGTTCCAACACCTTTGTCGCGGAACTGAAAGGTAAACAACCGGGTGATGTAGAAGTGCCGGTTATTGGCGGTCACTCTGGCGTTACTATTCTGCCGCTGCTGTCACAGGTTCCTGGCGTCAGTTTTACCGAGCAGGAAGTCGCAGATCTGACCAAACGTATCCAGAACGCGGGT…	ATAACGCGCGTGAGAAAGCGCGTGGCGCGAAAGCGATCGGCACCACGGGGCGTGGTATCGGGCCTGCTTATGAAGATAAAGTGGCACGTCGCGGTCTGCGTGTTGGCGACCTTTTCGACAAAGAAACCTTCGCTGAAAAACTGAAAGAAGTGATGGAATATCACAACTTCCAGTTGGTTAACTACTACAAAGTTGAAGCGGTTGATTACCAGAAAGTTCTGGATGATGTGATGGCCGTTGCCGACATCCTGACTTCCATGGTGGTTGACGTTTCTGACCTGCTCGATCAGGCGCGTCAGCGTGGCGATTTCGTCATGTTTGAAGGTGCGCAGGGTACGCTTCTGGATATCGACCACGGTACTTATCCGTACGTAACCTCTTCCAACACCACTGCGGGCG…	TGCTCGTAAACTGGGCGTCGATATCGACAACCTGCTGTGTTCCCAGCCGGACACTGGCGAACAGGCGCTGGAAATCTGTGACGCCCTGGCGCGCTCTGGCGCAGTAGATGTTATCGTTGTTGACTCCGTAGCGGCACTGACGCCGAAAGCGGAAATCGAAGGTGAAATCGGCGACTCTCACATGGGCCTTGCGGCACGTATGATGAGCCAGGCGATGCGTAAGCTGGCGGGTAACCTGAAGCAGTCCAACACGCTGCTGATCTTCATCAACCAGATCCGTATGAAAATTGGTGTGATGTTCGGTAACCCGGAAACCACTACCGGTGGTAACGCGCTGAAATTCTACGCCTCTGTTCGTCTCGACATCCGTCGTATCGGCGCGGTGAAAGAGGGCGAAAA…
3227	GGGGAAAGGGACTCAGGCTCAGTTCATCATGGAGAAATATGGTATTCCGCAAATCTCCACAGGTGATATGCTGCGTGCTGCGGTCAAATCTGGCTCCGAGCTGGGTAAACAAGCAAAAGACATTATGGACGCTGGCAAACTGGTTACCGATGAACTGGTGATCGCGCTGGTTAAAGAACGTATTGCTCAGGAAGACTGCCGTAACGGTTTCCTGCTTGACGGCTTCCCGCGTACTATTCCGCAGGCTGACGCGATGAAAGAAGCGGGCATCAATGTTGATTACGTTCTGGAGTTCGACGTACCGGACGAACTGATTGTTGATCGTATTGTTGGTCGCCGCGTTCACGCGCCATCTGGCCGTGTTTATCACGTTAAATTCAATCCGCCGAAAGTAGAAGG…	CGAGAGCTATTCGCCAGGCGGCGGATGAAGTGCTGGCAGGGCAACATGATGATGAGTTCCCGCTGGCAATCTGGCAAACGGGATCTGGTACGCAAAGCAATATGAATATGAATGAAGTACTGGCTAACCGGGCCAGCGAATTGCTTGGCGGCGTACGCGGAATGGAACGTAAAGTTCACCCTAACGATGACGTGAACAAAAGCCAAAGCTCCAATGATGTCTTCCCAACTGCTATGCACGTGGCGGCGTTATTGGCACTGCGTAAGCAACTCATTCCTCAGCTCAAAAACCTCACTCAAACTCTGAATGAGAAATCGCGCGCATTTGCCGATATCGTCAAAATTGGTCGTACCCACTTGCAGGACGCCACACCGCTGACTCTGGGACAGGAGATTTCTG…	GGTCTGCACGGCGTTGGTGTTTCGGTAGTAAACGCCCTGTCGCAAAAACTGGAGCTGGTTATTCAGCGCGAGGGTAAAATTCACCGTCAGATCTACGAACACGGTGTTCCGCAGGCACCGCTGGCGGTTACTGGTGACACCGACAAAACCGGCACCATGGTGCGTTTCTGGCCAAGCCTTGAAACTTTCACCAATGTGACCGAGTTCGAATACGATATTCTGGCGAAGCGTCTGCGTGAGCTGTCCTTCCTCAATTCCGGCGTGTCTATTCGTCTGAAAGACAAACGCGACGGCAAAGAAGACCACTTCCACTATGAAGGCGGCATTAAGGCGTTCGTTGAATATCTGAACAAGAACAAAACGCCGATTCACCCGAACATCTTCTACTTCTCCACCGAA…	CGACGCTGCCGTCGAGAAAGCCTATAAAGGCGAGCGTAAAATCTCCTGGATGGAAATTTACACCGGTGAAAAATCCACACAGGTTTATGGTCAGGACGTCTGGTTGCCTGCTGAAACCCTTGATCTGATTCGTGAATATCGCGTTGCTATCAAAGGCCCTCTGACCACTCCGGTTGGCGGCGGTATTCGTTCTCTTAACGTTGCCCTGCGCCAGGAGCTGGATCTTTACATCTGCCTGCGTCCGGTACGTTACTACCAGGGCACCCCAAGCCCGGTTAAACACCCTGAACTGACCGATATGGTTATCTTCCGTGAAAACTCGGAAGACATTTATGCGGGTATCGAATGGAAAGCTGACTCTGCCGACGCTGAGAAAGTGATCAAATTCCTGCGTGAAGA…	GGTGTAGCGCGTAAACCGGGTATGGATCGTTCCGACCTGTTTAACGTTAACGCCGGTATTGTGAAGAATCTGGTTCAGCAAGTTGCGAAAACTTGCCCGAAAGCGTGCATTGGCATTATCACTAACCCGGTTAACACCACTGTGGCTATCGCTGCGGAAGTGCTGAAAAAAGCCGGTGTTTATGACAAAAACAAGCTGTTTGGCGTTACTACGCTGGATATTATTCGTTCCAACACCTTTGTCGCGGAACTGAAAGGTAAACAACCGGGTGATGTAGAAGTGCCGGTTATTGGCGGTCACTCTGGCGTTACTATTCTGCCGCTGCTGTCACAGGTTCCTGGCGTCAGTTTTACCGAGCAGGAAGTCGCAGATCTGACCAAACGTATCCAGAACGCGGGT…	ATAACGCGCGTGAGAAAGCGCGTGGCGCGAAAGCGATCGGCACCACGGGGCGTGGTATCGGGCCTGCTTATGAAGATAAAGTGGCACGTCGCGGTCTGCGTGTTGGCGACCTTTTCGACAAAGAAACCTTCGCTGAAAAACTGAAAGAAGTGATGGAATATCACAACTTCCAGTTGGTTAACTACTACAAAGTTGAAGCGGTTGATTACCAGAAAGTTCTGGATGATGTGATGGCCGTTGCCGACATCCTGACTTCCATGGTGGTTGACGTTTCTGACCTGCTCGATCAGGCGCGTCAGCGTGGCGATTTCGTCATGTTTGAAGGTGCGCAGGGTACGCTTCTGGATATCGACCACGGTACTTATCCGTACGTAACCTCTTCCAACACCACTGCGGGCG…	TGCTCGTAAACTGGGCGTCGATATCGACAACCTGCTGTGTTCCCAGCCGGACACTGGCGAACAGGCGCTGGAAATCTGTGACGCCCTGGCGCGCTCTGGCGCAGTAGATGTTATCGTTGTTGACTCCGTAGCGGCACTGACGCCGAAAGCGGAAATCGAAGGTGAAATCGGCGACTCTCACATGGGCCTTGCGGCACGTATGATGAGCCAGGCGATGCGTAAGCTGGCGGGTAACCTGAAGCAGTCCAACACGCTGCTGATCTTCATCAACCAGATCCGTATGAAAATTGGTGTGATGTTCGGTAACCCGGAAACCACTACCGGTGGTAACGCGCTGAAATTCTACGCCTCTGTTCGTCTCGACATCCGTCGTATCGGCGCGGTGAAAGAGGGCGAAAA…
3242	GGGGAAAGGGACTCAGGCTCAGTTCATCATGGAGAAATATGGTATTCCGCAAATCTCCACAGGTGATATGCTGCGTGCTGCGGTCAAATCTGGCTCCGAGCTGGGTAAACAAGCAAAAGACATTATGGACGCTGGCAAACTGGTTACCGATGAACTGGTGATCGCGCTGGTTAAAGAACGTATTGCTCAGGAAGACTGCCGTAACGGTTTCCTGCTTGACGGCTTCCCGCGTACTATTCCGCAGGCTGACGCGATGAAAGAAGCGGGCATCAATGTTGATTACGTTCTGGAGTTCGACGTACCGGACGAACTGATTGTTGATCGTATTGTTGGTCGCCGCGTTCACGCGCCATCTGGCCGTGTTTATCACGTTAAATTCAATCCGCCGAAAGTAGAAGG…	CGAGAGCTATTCGCCAGGCGGCGGATGAAGTGCTGGCAGGGCAACATGATGATGAGTTCCCGCTGGCAATCTGGCAAACGGGATCTGGTACGCAAAGCAATATGAATATGAATGAAGTACTGGCTAACCGGGCCAGCGAATTGCTTGGCGGCGTACGCGGAATGGAACGTAAAGTTCACCCTAACGATGACGTGAACAAAAGCCAAAGCTCCAATGATGTCTTCCCAACTGCTATGCACGTGGCGGCGTTATTGGCACTGCGTAAGCAACTCATTCCTCAGCTCAAAAACCTCACTCAAACTCTGAATGAGAAATCGCGCGCATTTGCCGATATCGTCAAAATTGGTCGTACCCACTTGCAGGACGCCACACCGCTGACTCTGGGACAGGAGATTTCTG…	GGTCTGCACGGCGTTGGTGTTTCGGTAGTAAACGCCCTGTCGCAAAAACTGGAGCTGGTTATTCAGCGCGAGGGTAAAATTCACCGTCAGATCTACGAACACGGTGTTCCGCAGGCACCGCTGGCGGTTACTGGTGACACCGACAAAACCGGCACCATGGTGCGTTTCTGGCCAAGCCTTGAAACTTTCACCAATGTGACCGAGTTCGAATACGATATTCTGGCGAAGCGTCTGCGTGAGCTGTCCTTCCTCAATTCCGGCGTGTCTATTCGTCTGAAAGACAAACGCGACGGCAAAGAAGACCACTTCCACTATGAAGGCGGCATTAAGGCGTTCGTTGAATATCTGAACAAGAACAAAACGCCGATTCACCCGAACATCTTCTACTTCTCCACCGAA…	CGATGCTGCCGTCGAGAAAGCCTATAAAGGTGAGCGTAAAATCTCCTGGATGGAAATTTACACCGGTGAAAAATCCACACAGGTTTATGGTCAGGACGTCTGGCTGCCTGCTGAAACCCTTGATCTGATTCGTGAATATCGCGTTGCTATCAAAGGCCCTCTGACCACTCCGGTTGGCGGCGGTATTCGTTCTCTTAACGTTGCCCTGCGCCAGGAGCTGGATCTTTACATCTGCCTGCGTCCGGTACGTTACTACCAGGGCACTCCAAGCCCGGTTAAACACCCTGAACTGACCGATATGGTTATCTTCCGTGAAAACTCGGAAGACATTTATGCGGGTATCGAATGGAAAGCTGACTCTGCCGACGCAGAGAAAGTGATTAAATTCCTGCGTGAAGA…	GGTGTAGCGCGTAAACCGGGTATGGATCGTTCCGACCTGTTTAACGTTAACGCCGGTATTGTGAAGAATCTGGTTCAGCAAGTTGCGAAAACTTGCCCGAAAGCGTGCATTGGCATTATCACTAACCCGGTTAACACCACTGTGGCTATCGCTGCGGAAGTGCTGAAAAAAGCCGGTGTTTATGACAAAAACAAGCTGTTTGGCGTTACTACGCTGGATATTATTCGTTCCAACACCTTTGTCGCGGAACTGAAAGGTAAACAACCGGGTGATGTAGAAGTGCCGGTTATTGGCGGTCACTCTGGCGTTACTATTCTGCCGCTGCTGTCACAGGTTCCTGGCGTCAGTTTTACCGAGCAGGAAGTCGCAGATCTGACCAAACGTATCCAGAACGCGGGT…	ATAACGCGCGTGAGAAAGCGCGTGGCGCGAAAGCGATCGGCACCACGGGGCGTGGTATCGGGCCTGCTTATGAAGATAAAGTGGCACGTCGCGGTCTGCGTGTTGGCGACCTTTTCGACAAAGAAACCTTCGCTGAAAAACTGAAAGAAGTGATGGAATATCACAACTTCCAGTTGGTTAACTACTACAAAGTTGAAGCGGTTGATTACCAGAAAGTTCTGGATGATGTGATGGCCGTTGCCGACATCCTGACTTCCATGGTGGTTGACGTTTCTGACCTGCTCGATCAGGCGCGTCAGCGTGGCGATTTCGTCATGTTTGAAGGTGCGCAGGGTACGCTTCTGGATATCGACCACGGTACTTATCCGTACGTAACCTCTTCCAACACCACTGCGGGCG…	TGCTCGTAAACTGGGCGTCGATATCGACAACCTGCTGTGTTCCCAGCCGGACACTGGCGAACAGGCGCTGGAAATCTGTGACGCCCTGGCGCGCTCTGGCGCAGTAGATGTTATCGTTGTTGACTCCGTAGCGGCACTGACGCCGAAAGCGGAAATCGAAGGTGAAATCGGCGACTCTCACATGGGCCTTGCGGCACGTATGATGAGCCAGGCGATGCGTAAGCTGGCGGGTAACCTGAAGCAGTCCAACACGCTGCTGATCTTCATCAACCAGATCCGTATGAAAATTGGTGTGATGTTCGGTAACCCGGAAACCACTACCGGTGGTAACGCGCTGAAATTCTACGCCTCTGTTCGTCTCGACATCCGTCGTATCGGCGCGGTGAAAGAGGGCGAAAA…
3246	GGGGAAAGGGACTCAGGCTCAGTTCATCATGGAGAAATATGGTATTCCGCAAATCTCCACAGGTGATATGCTGCGTGCTGCGGTCAAATCTGGCTCCGAGCTGGGTAAACAAGCAAAAGACATTATGGACGCTGGCAAACTGGTTACCGATGAACTGGTGATCGCGCTGGTTAAAGAACGTATTGCTCAGGAAGACTGCCGTAACGGTTTCCTGCTTGACGGCTTCCCGCGTACTATTCCGCAGGCTGACGCGATGAAAGAAGCGGGCATCAATGTTGATTACGTTCTGGAGTTCGACGTACCGGACGAACTGATTGTTGATCGTATTGTTGGTCGCCGCGTTCACGCGCCATCTGGCCGTGTTTATCACGTTAAATTCAATCCGCCGAAAGTAGAAGG…	CGAGAGCTATTCGCCAGGCGGCGGATGAAGTGCTGGCAGGGCAACATGATGATGAGTTCCCGCTGGCAATCTGGCAAACGGGATCTGGTACGCAAAGCAATATGAATATGAATGAAGTACTGGCTAACCGGGCCAGCGAATTGCTTGGCGGCGTACGCGGAATGGAACGTAAAGTTCACCCTAACGATGACGTGAACAAAAGCCAAAGCTCCAATGATGTCTTCCCAACTGCTATGCACGTGGCGGCGTTATTGGCACTGCGTAAGCAACTCATTCCTCAGCTCAAAAACCTCACTCAAACTCTGAATGAGAAATCGCGCGCATTTGCCGATATCGTCAAAATTGGTCGTACCCACTTGCAGGACGCCACACCGCTGACTCTGGGACAGGAGATTTCTG…	GGTCTGCACGGCGTTGGTGTTTCGGTAGTAAACGCCCTGTCGCAAAAACTGGAGCTGGTTATTCAGCGCGAGGGTAAAATTCACCGTCAGATCTACGAACACGGTGTTCCGCAGGCACCGCTGGCGGTTACTGGTGACACCGACAAAACCGGCACCATGGTGCGTTTCTGGCCAAGCCTTGAAACTTTCACCAATGTGACCGAGTTCGAATACGATATTCTGGCGAAGCGTCTGCGTGAGCTGTCCTTCCTCAATTCCGGCGTGTCTATTCGTCTGAAAGACAAACGTGACGGCAAAGAAGACCACTTCCACTATGAAGGCGGCATTAAGGCGTTCGTTGAATATCTGAACAAGAACAAAACGCCGATTCACCCGAACATCTTCTACTTCTCCACCGAA…	CGACGCTGCCGTCGAGAAAGCCTATAAAGGCGAGCGTAAAATCTCCTGGATGGAAATTTACACCGGTGAAAAATCCACACAGGTTTATGGTCAGGACGTCTGGTTGCCTGCTGAAACCCTTGATCTGATTCGTGAATATCGCGTTGCTATCAAAGGCCCTCTGACCACTCCGGTTGGCGGCGGTATTCGTTCTCTTAACGTTGCCCTGCGCCAGGAGCTGGATCTTTACATCTGCCTGCGTCCGGTACGTTACTACCAGGGCACCCCAAGCCCGGTTAAACACCCTGAACTGACCGATATGGTTATCTTCCGTGAAAACTCGGAAGACATTTATGCGGGTATCGAATGGAAAGCTGACTCTGCCGACGCTGAGAAAGTGATCAAATTCCTGCGTGAAGA…	GGTGTAGCGCGTAAACCGGGTATGGATCGTTCCGACCTGTTTAACGTTAACGCCGGTATTGTGAAGAATCTGGTTCAGCAAGTTGCGAAAACTTGCCCGAAAGCGTGCATTGGCATTATCACTAACCCGGTTAACACCACTGTGGCTATCGCTGCGGAAGTGCTGAAAAAAGCCGGTGTTTATGACAAAAACAAGCTGTTTGGCGTTACTACGCTGGATATTATTCGTTCCAACACCTTTGTCGCGGAACTGAAAGGTAAACAACCGGGTGATGTAGAAGTGCCGGTTATTGGCGGTCACTCTGGCGTTACTATTCTGCCGCTGCTGTCACAGGTTCCTGGCGTCAGTTTTACCGAGCAGGAAGTCGCAGATCTGACCAAACGTATCCAGAACGCGGGT…	ATAACGCGCGTGAGAAAGCGCGTGGCGCGAAAGCGATCGGCACCACGGGGCGTGGTATCGGGCCTGCTTATGAAGATAAAGTGGCACGTCGCGGTCTGCGTGTTGGCGACCTTTTCGACAAAGAAACCTTCGCTGAAAAACTGAAAGAAGTGATGGAATATCACAACTTCCAGTTGGTTAACTACTACAAAGTTGAAGCGGTTGATTACCAGAAAGTTCTGGATGATGTGATGGCCGTTGCCGACATCCTGACTTCCATGGTGGTTGACGTTTCTGACCTGCTCGATCAGGCGCGTCAGCGTGGCGATTTCGTCATGTTTGAAGGTGCGCAGGGTACGCTTCTGGATATCGACCACGGTACTTATCCGTACGTAACCTCTTCCAACACCACTGCGGGCG…	TGCTCGTAAACTGGGCGTCGATATCGACAACCTGCTGTGTTCCCAGCCGGACACTGGCGAACAGGCGCTGGAAATCTGTGACGCCCTGGCGCGCTCTGGCGCAGTAGATGTTATCGTTGTTGACTCCGTAGCGGCACTGACGCCGAAAGCGGAAATCGAAGGTGAAATCGGCGACTCTCACATGGGCCTTGCGGCACGTATGATGAGCCAGGCGATGCGTAAGCTGGCGGGTAACCTGAAGCAGTCCAACACGCTGCTGATCTTCATCAACCAGATCCGTATGAAAATTGGTGTGATGTTCGGTAACCCGGAAACCACTACCGGTGGTAACGCGCTGAAATTCTACGCCTCTGTTCGTCTCGACATCCGTCGTATCGGCGCGGTGAAAGAGGGCGAAAA…
3247	GGGGAAAGGGACTCAGGCTCAGTTCATCATGGAGAAATATGGTATTCCGCAAATCTCCACAGGTGATATGCTGCGTGCCGCAGTCAAATCTGGCTCCGAGCTGGGTAAACAAGCAAAAGACATTATGGACGCTGGCAAACTGGTTACCGATGAACTGGTGATCGCGCTGGTTAAAGAACGTATTGCTCAGGAAGACTGCCGTAACGGTTTCCTGCTTGACGGCTTCCCGCGTACTATTCCGCAGGCTGACGCGATGAAAGAAGCGGGCATCAATGTTGATTACGTTCTGGAGTTCGACGTACCGGACGAACTGATTGTTGATCGTATTGTTGGTCGCCGCGTTCACGCGCCATCTGGCCGTGTTTATCACGTTAAATTCAATCCGCCGAAAGTAGAAGG…	CGAGAGCCATTCGCCAGGCGGCGGATGAAGTGCTGGCAGGACAACATGATGATGAGTTCCCGCTGGCAATCTGGCAAACGGGATCCGGTACGCAAAGCAATATGAATATGAATGAAGTACTGGCTAATCGGGCCAGCGAATTGCTTGGCGGCGTACGCGGAATGGAACGTAAAGTTCACCCTAACGATGACGTGAACAAAAGCCAAAGCTCCAATGATGTCTTCCCAACTGCTATGCACGTAGCGGCGTTATTGGCACTGCGTAAGCAACTCATTCCTCAGCTCAAAAACCTCACTCAAACTCTGAATGAGAAATCGCGCGCATTTGCCGATATCGTCAAAATTGGTCGTACCCACTTGCAGGACGCCACACCGCTGACCCTGGGACAGGAGATTTCTG…	GGTCTGCACGGCGTTGGTGTTTCGGTAGTAAACGCCCTGTCGCAAAAACTGGAGCTGGTTATTCAGCGCGAGGGTAAAATTCACCGTCAGATCTACGAACACGGTGTTCCGCAGGCACCGCTGGCGGTTACTGGTGACACCGACAAAACCGGCACCATGGTGCGTTTCTGGCCAAGCCTTGAAACTTTCACCAATGTGACCGAGTTCGAATACGATATTCTGGCGAAGCGTCTGCGTGAGCTGTCCTTCCTCAATTCCGGCGTGTCTATTCGTCTGAAAGACAAACGCGACGGCAAAGAAGACCACTTCCACTATGAAGGCGGCATTAAGGCGTTCGTTGAATATCTGAACAAGAACAAAACGCCGATTCACCCGAACATCTTCTACTTCTCCACCGAA…	CGATGCTGCCGTCGAGAAAGCCTATAAAGGTGAGCGTAAAATCTCCTGGATGGAAATTTACACCGGTGAAAAATCCACACAGGTTTATGGTCAGGACGTCTGGCTGCCTGCTGAAACCCTTGATCTGATTCGTGAATATCGCGTTGCTATCAAAGGCCCTCTGACCACTCCGGTTGGCGGCGGTATTCGTTCTCTTAACGTTGCCCTGCGCCAGGAGCTGGATCTTTACATCTGCCTGCGTCCGGTACGTTACTACCAGGGCACCCCAAGCCCGGTTAAACACCCTGAACTGACCGATATGGTTATCTTCCGTGAAAACTCGGAAGACATTTATGCGGGTATCGAATGGAAAGCTGACTCTGCCGACGCTGAGAAAGTGATCAAATTCCTGCGTGAAGA…	GGTGTAGCGCGTAAACCGGGTATGGATCGTTCCGACCTGTTTAACGTTAACGCCGGTATTGTGAAGAATCTGGTTCAGCAAGTTGCGAAAACTTGCCCGAAAGCGTGCATTGGCATTATCACTAACCCGGTTAACACCACTGTGGCTATCGCTGCGGAAGTGCTGAAAAAAGCCGGTGTTTATGACAAAAACAAGCTGTTTGGCGTTACTACGCTGGATATTATTCGTTCCAACACCTTTGTCGCGGAACTGAAAGGTAAACAACCGGGTGATGTAGAAGTGCCTGTTATTGGCGGTCACTCTGGCGTTACTATTCTGCCGCTGCTGTCACAGGTTCCTGGCGTCAGTTTTACCGAGCAGGAAGTCGCAGATCTGACCAAACGTATCCAGAACGCGGGC…	ATAACGCGCGTGAGAAAGCGCGTGGCGCGAAAGCGATCGGCACCACGGGGCGTGGTATCGGGCCTGCTTATGAAGATAAAGTGGCACGTCGCGGTCTGCGTGTTGGCGACCTTTTCGACAAAGAAACCTTCGCTGAAAAACTGAAAGAAGTGATGGAATATCACAACTTCCAGTTGGTTAACTACTACAAAGTTGAAGCGGTTGATTACCAGAAAGTTCTGGATGATGTGATGGCCGTTGCTGACATCCTGACTTCCATGGTGGTTGACGTTTCTGACCTGCTTGACCAGGCGCGTCAGCGTGGCGATTTCGTCATGTTTGAAGGTGCGCAGGGTACGCTTCTGGATATCGACCACGGTACTTATCCGTACGTAACCTCTTCCAACACCACTGCGGGCG…	TGCTCGTAAACTGGGCGTCGATATTGACAACCTGCTGTGTTCCCAGCCGGACACTGGCGAACAGGCGCTGGAAATCTGTGACGCCCTGGCGCGCTCTGGCGCAGTAGACGTTATCGTTGTTGACTCCGTAGCGGCACTGACGCCGAAAGCGGAAATCGAAGGTGAAATCGGCGACTCTCACATGGGCCTTGCGGCACGTATGATGAGCCAGGCGATGCGTAAGCTGGCGGGTAACCTGAAGCAGTCCAACACGCTGCTGATCTTCATCAACCAGATCCGTATGAAAATTGGTGTGATGTTCGGTAACCCGGAAACCACTACCGGTGGTAACGCGCTGAAATTCTACGCCTCTGTTCGTCTCGACATCCGTCGTATCGGCGCGGTGAAAGAGGGCGAAAA…
3248	GGGGAAAGGGACTCAGGCTCAGTTCATCATGGAGAAATATGGTATTCCGCAAATCTCCACAGGTGATATGCTGCGTGCTGCGGTCAAATCTGGCTCCGAGCTGGGTAAACAAGCAAAAGACATTATGGACGCTGGCAAACTGGTTACCGATGAACTGGTGATCGCGCTGGTTAAAGAACGTATTGCTCAGGAAGACTGCCGTAACGGTTTCCTGCTTGACGGCTTCCCGCGTACTATTCCGCAGGCTGACGCGATGAAAGAAGCGGGCATCAATGTTGATTACGTTCTGGAGTTCGACGTACCGGACGAACTGATTGTTGATCGTATTGTTGGTCGCCGCGTTCACGCGCCATCTGGCCGTGTTTATCACGTTAAATTCAATCCGCCGAAAGTAGAAGG…	CGAGAGCCATTCGCCAGGCGGCGGATGAAGTGCTGGCAGGGCAACATGATGATGAGTTCCCGCTGGCAATCTGGCAAACGGGATCTGGTACGCAAAGCAATATGAATATGAATGAAGTACTGGCTAACCGGGCCAGCGAATTGCTTGGCGGCGTACGCGGAATGGAACGTAAAGTTCACCCCAACGATGACGTGAACAAAAGCCAAAGCTCCAATGATGTCTTCCCAACTGCTATGCACGTGGCGGCGTTATTGGCACTGCGTAAGCAACTCATTCCTCAGCTCAAAAACCTCACTCAAACTCTGAATGAGAAATCGCGTGCATTTGCCGATATCGTCAAAATTGGTCGTACCCACTTGCAGGACGCCACACCGCTGACCCTGGGACAGGAGATTTCTG…	GGTCTGCACGGCGTTGGTGTTTCGGTAGTAAACGCCCTGTCGCAAAAACTGGAGCTGGTTATTCAGCGCGAGGGTAAAATTCACCGTCAGATCTACGAACACGGTGTTCCGCAGGCACCGCTGGCGGTTACTGGTGACACCGACAAAACCGGCACCATGGTGCGTTTCTGGCCAAGCCTTGAAACTTTCACCAATGTGACCGAGTTCGAATACGATATTCTGGCGAAGCGTCTACGTGAGCTGTCCTTCCTCAACTCCGGCGTGTCTATTCGTCTGAAAGACAAACGCGACGGCAAAGAAGACCACTTCCACTATGAAGGCGGCATTAAGGCGTTCGTTGAATATCTGAACAAGAACAAAACGCCGATTCACCCGAACATCTTCTACTTCTCCACCGAA…	CGATGCTGCCGTCGAGAAAGCCTATAAAGGTGAGCGTAAAATCTCCTGGATGGAAATTTACACCGGTGAAAAATCCACACAGGTTTATGGTCAGGACGTCTGGCTGCCTGCTGAAACCCTTGATCTGATTCGTGAATATCGCGTTGCTATCAAAGGCCCTCTGACCACTCCGGTTGGCGGCGGTATTCGTTCTCTTAACGTTGCCCTGCGCCAGGAGCTGGATCTTTACATCTGCCTGCGTCCGGTACGTTACTACCAGGGTACCCCAAGCCCGGTTAAACACCCTGAACTGACCGATATGGTTATCTTCCGTGAAAACTCGGAAGACATTTATGCGGGTATCGAATGGAAAGCTGACTCTGCCGACGCTGAGAAAGTGATCAAATTCCTGCGTGAAGA…	GGTGTAGCGCGTAAACCGGGTATGGATCGTTCCGACCTGTTTAACGTTAACGCCGGTATTGTGAAGAATCTGGTTCAGCAAGTTGCGAAAACTTGCCCGAAAGCGTGCATTGGCATTATCACTAACCCGGTTAACACCACTGTGGCTATCGCTGCGGAAGTGCTGAAAAAAGCCGGTGTTTATGACAAAAACAAGCTGTTTGGCGTTACTACGCTGGATATTATTCGTTCCAACACCTTTGTCGCGGAACTGAAAGGTAAACAACCGGGTGATGTAGAAGTGCCGGTTATTGGCGGTCACTCTGGCGTTACTATTCTGCCGCTGCTGTCACAGGTTCCTGGCGTCAGTTTTACCGAGCAGGAAGTCGCAGATCTGACCAAACGTATCCAGAACGCGGGC…	ATAACGCGCGTGAGAAAGCGCGCGGCGCGAAAGCGATCGGCACCACGGGGCGTGGTATCGGGCCTGCTTATGAAGATAAAGTGGCACGTCGCGGTCTGCGTGTTGGCGACCTTTTCGACAAAGAAACCTTCGCTGAAAAACTGAAAGAAGTGATGGAATATCACAACTTCCAGTTGGTTAACTACTACAAAGTTGAAGCGGTTGATTACCAGAAAGTTCTGGATGATGTGATGGCCGTTGCCGACATCCTGACTTCCATGGTGGTTGACGTTTCTGACCTGCTTGACCAGGCGCGTCAGCGTGGCGATTTCGTCATGTTTGAAGGTGCGCAGGGTACGCTTCTGGATATCGACCACGGTACTTATCCGTACGTAACCTCTTCCAACACCACTGCGGGTG…	TGCTCGTAAACTGGGCGTCGATATCGACAACCTGCTGTGTTCCCAGCCGGACACTGGCGAACAGGCGCTGGAAATCTGTGACGCCCTGGCGCGCTCTGGCGCAGTAGACGTTATCGTTGTTGACTCCGTAGCGGCACTGACGCCGAAAGCGGAAATCGAAGGTGAAATCGGCGACTCTCACATGGGCCTTGCGGCACGTATGATGAGCCAGGCGATGCGTAAGCTGGCGGGTAACCTGAAGCAGTCCAACACGCTGCTGATCTTCATCAACCAGATCCGTATGAAAATTGGTGTGATGTTCGGTAACCCGGAAACCACTACCGGTGGTAACGCGCTGAAATTCTACGCCTCTGTTCGTCTCGACATCCGTCGTATCGGCGCGGTGAAAGAGGGCGAAAA…
3249	GGGGAAAGGGACTCAGGCTCAGTTCATCATGGAGAAATATGGTATTCCGCAAATCTCCACAGGTGATATGCTGCGTGCTGCGGTCAAATCTGGCTCCGAGCTGGGTAAACAAGCAAAAGACATTATGGACGCTGGCAAACTGGTTACCGATGAACTGGTGATCGCGCTGGTTAAAGAACGTATTGCTCAGGAAGACTGCCGTAACGGTTTCCTGCTTGACGGCTTCCCGCGTACTATTCCGCAGGCTGACGCGATGAAAGAAGCGGGCATCAATGTTGATTACGTTCTGGAGTTCGACGTACCGGACGAACTGATTGTTGATCGTATTGTTGGTCGCCGCGTTCACGCGCCATCTGGCCGTGTTTATCACGTTAAATTCAATCCGCCGAAAGTAGAAGG…	CGAGAGCCATTCGCCAGGCGGCGGATGAAGTGCTGGCAGGGCAACATGATGATGAGTTCCCGCTGGCAATCTGGCAAACGGGATCTGGTACGCAAAGCAATATGAATATGAATGAAGTACTGGCTAACCGGGCCAGCGAATTGCTTGGCGGCGTACGCGGAATGGAACGTAAAGTTCACCCCAACGATGACGTGAACAAAAGCCAAAGCTCCAATGATGTCTTCCCAACTGCTATGCACGTGGCGGCGTTATTGGCACTGCGTAAGCAACTCATTCCTCAGCTCAAAAACCTCACTCAAACTCTGAATGAGAAATCGCGTGCATTTGCCGATATCGTCAAAATTGGTCGTACCCACTTGCAGGACGCCACACCGCTGACCCTGGGACAGGAGATTTCTG…	GGTCTGCACGGCGTTGGTGTTTCGGTAGTAAACGCCCTGTCGCAAAAACTGGAGCTGGTTATTCAGCGCGAGGGTAAAATTCACCGTCAGATCTACGAACACGGTGTTCCGCAGGCACCGCTGGCGGTTACTGGTGACACCGACAAAACCGGCACCATGGTGCGTTTCTGGCCAAGCCTTGAAACTTTCACCAATGTGACCGAGTTCGAATACGATATTCTGGCGAAGCGTCTGCGTGAGCTGTCCTTCCTCAACTCCGGCGTGTCTATTCGTCTGAAAGACAAACGCGACGGCAAAGAAGACCACTTCCACTATGAAGGCGGCATTAAGGCGTTCGTTGAATATCTGAACAAGAACAAAACGCCGATTCACCCGAACATCTTCTACTTCTCCACCGAA…	CGATGCTGCCGTCGAGAAAGCCTATAAAGGTGAGCGTAAAATCTCCTGGATGGAAATTTACACCGGTGAAAAATCCACACAGGTTTATGGTCAGGACGTCTGGCTGCCTGCTGAAACCCTTGATCTGATTCGTGAATATCGCGTTGCTATCAAAGGCCCTCTGACCACTCCGGTTGGCGGCGGTATTCGTTCTCTTAACGTTGCCCTGCGTCAGGAGCTGGATCTTTACATCTGCCTGCGTCCGGTACGTTACTACCAGGGCACCCCAAGCCCGGTTAAACACCCTGAACTGACCGATATGGTTATCTTCCGTGAAAACTCGGAAGACATTTATGCGGGTATCGAATGGAAAGCTGACTCTGCCGACGCTGAGAAAGTGATCAAATTCCTGCGTGAAGA…	GGTGTAGCGCGTAAACCGGGTATGGATCGTTCCGACCTGTTTAACGTTAACGCCGGTATTGTGAAGAATCTGGTTCAGCAAGTTGCGAAAACTTGCCCGAAAGCGTGCATTGGCATTATCACTAACCCGGTTAACACCACTGTGGCTATCGCTGCGGAAGTGCTGAAAAAAGCCGGTGTTTATGACAAAAACAAGCTGTTTGGCGTTACTACGCTGGATATTATTCGTTCCAACACCTTTGTCGCGGAACTGAAAGGTAAACAACCGGGTGATGTAGAAGTGCCGGTTATTGGCGGTCACTCTGGCGTTACTATTCTGCCGCTGCTGTCACAGGTTCCTGGCGTCAGTTTTACCGAGCAGGAAGTCGCAGATCTGACCAAACGTATCCAGAACGCGGGT…	ATAACGCGCGTGAGAAAGCGCGTGGCGCGAAAGCGATCGGCACCACGGGGCGTGGTATCGGGCCTGCTTATGAAGATAAAGTGGCACGTCGCGGTCTGCGTGTTGGCGACCTTTTCGACAAAGAAACCTTCGCTGAAAAACTGAAAGAAGTGATGGAATATCACAACTTCCAGTTGGTTAACTACTACAAAGTTGAAGCGGTTGATTACCAGAAAGTTCTGGATGATGTGATGGCCGTTGCCGACATCCTGACTTCCATGGTGGTTGACGTTTCTGACCTGCTCGATCAGGCGCGTCAGCGTGGCGATTTCGTCATGTTTGAAGGTGCGCAGGGTACGCTTCTGGATATCGACCACGGTACTTATCCGTACGTAACCTCTTCCAACACCACTGCGGGCG…	TGCTCGTAAACTGGGCGTCGATATCGACAACCTGCTGTGTTCCCAGCCGGACACTGGCGAACAGGCGCTGGAAATCTGTGACGCCCTGGCGCGCTCTGGCGCAGTAGATGTTATCGTTGTTGACTCCGTAGCGGCACTGACGCCGAAAGCGGAAATCGAAGGTGAAATCGGCGACTCTCACATGGGCCTTGCGGCACGTATGATGAGCCAGGCGATGCGTAAGCTGGCGGGTAACCTGAAGCAGTCCAACACGCTGCTGATCTTCATCAACCAGATCCGTATGAAAATTGGTGTGATGTTCGGTAACCCGGAAACCACTACCGGTGGTAACGCGCTGAAATTCTACGCCTCTGTTCGTCTCGACATCCGTCGTATCGGCGCGGTGAAAGAGGGCGAAAA…
3250	GGGGAAAGGGACTCAGGCTCAGTTCATCATGGAGAAATATGGTATTCCGCAAATCTCCACAGGTGATATGCTGCGTGCCGCAGTCAAATCTGGCTCCGAGCTGGGTAAACAAGCAAAAGACATTATGGACGCTGGCAAACTGGTTACCGATGAACTGGTGATCGCGCTGGTTAAAGAACGTATTGCTCAGGAAGACTGCCGTAACGGTTTCCTGCTTGACGGCTTCCCGCGTACTATTCCGCAGGCTGACGCGATGAAAGAAGCGGGCATCAATGTTGATTACGTTCTGGAGTTCGACGTACCGGACGAACTGATTGTTGATCGTATTGTTGGTCGCCGCGTTCACGCGCCATCTGGCCGTGTTTATCACGTTAAATTCAATCCGCCGAAAGTAGAAGG…	CGAGAGCCATTCGCCAGGCGGCGGATGAAGTGCTGGCAGGACAACATGATGATGAGTTCCCGCTGGCAATCTGGCAAACGGGATCCGGTACGCAAAGCAATATGAATATGAATGAAGTACTGGCTAATCGGGCCAGCGAATTGCTTGGCGGCGTACGCGGAATGGAACGTAAAGTTCACCCTAACGATGACGTGAACAAAAGCCAAAGCTCCAATGATGTCTTCCCAACTGCTATGCACGTAGCGGCGTTATTGGCACTGCGTAAGCAACTCATTCCTCAGCTCAAAAACCTCACTCAAACTCTGAATGAGAAATCGCGCGCATTTGCCGATATCGTCAAAATTGGTCGTACCCACTTGCAGGACGCCACACCGCTGACCCTGGGACAGGAGATTTCTG…	GGTCTGCACGGCGTTGGTGTTTCGGTAGTAAACGCCCTGTCGCAAAAACTGGAGCTGGTTATTCAGCGCGAGGGTAAAATTCACCGTCAGATCTACGAACACGGTGTTCCGCAGGCACCGCTGGCGGTTACTGGTGACACCGACAAAACCGGCACCATGGTGCGTTTCTGGCCAAGCCTTGAAACTTTCACCAATGTGACCGAGTTCGAATACGATATTCTGGCGAAGCGTCTGCGTGAGCTGTCCTTCCTCAATTCCGGCGTGTCTATTCGTCTGAAAGACAAACGCGACGGCAAAGAAGACCACTTCCACTATGAAGGCGGCATTAAGGCGTTCGTTGAATATCTGAACAAGAACAAAACGCCGATTCACCCGAACATCTTCTACTTCTCCACCGAA…	CGATGCTGCCGTCGAGAAAGCCTATAAAGGTGAGCGTAAAATCTCCTGGATGGAAATTTACACCGGTGAAAAATCCACACAGGTTTATGGTCAGGACGTCTGGCTGCCTGCTGAAACCCTTGATCTGATTCGTGAATATCGCGTTGCTATCAAAGGCCCTCTGACCACTCCGGTTGGCGGCGGTATTCGTTCTCTTAACGTTGCCCTGCGTCAGGAGCTGGATCTTTACATCTGCCTGCGTCCGGTACGTTACTACCAGGGCACCCCAAGCCCGGTTAAACACCCTGAACTGACCGATATGGTTATCTTCCGTGAAAACTCGGAAGACATTTATGCGGGTATCGAATGGAAAGCTGACTCTGCCGACGCTGAGAAAGTGATCAAATTCCTGCGTGAAGA…	GGTGTAGCGCGTAAACCGGGTATGGATCGTTCCGACCTGTTTAACGTTAACGCCGGTATTGTGAAGAATCTGGTTCAGCAAGTTGCGAAAACTTGCCCGAAAGCGTGCATTGGCATTATCACTAACCCGGTTAACACCACTGTGGCTATCGCTGCGGAAGTGCTGAAAAAAGCCGGTGTTTATGACAAAAACAAGCTGTTTGGCGTTACTACGCTGGATATTATTCGTTCCAACACCTTTGTCGCGGAACTGAAAGGTAAACAACCGGGTGATGTAGAAGTGCCTGTTATTGGCGGTCACTCTGGCGTTACTATTCTGCCGCTGCTGTCACAGGTTCCTGGCGTCAGTTTTACCGAGCAGGAAGTCGCAGATCTGACCAAACGTATCCAGAACGCGGGT…	ATAACGCGCGTGAGAAAGCGCGTGGCGCGAAAGCGATCGGCACCACGGGGCGTGGTATCGGGCCTGCTTATGAAGATAAAGTAGCACGCCGCGGTCTGCGTGTTGGCGACCTTTTCGACAAAGAAACCTTCGCTGAAAAACTGAAAGAAGTGATGGAATATCACAACTTCCAGTTGGTTAACTACTACAAAGTTGAAGCGGTTGATTACCAGAAAGTTCTGGATGATGTGATGGCCGTTGCCGACATCCTGACTTCCATGGTGGTTGACGTTTCTGACCTGCTTGACCAGGCGCGTCAGCGTGGCGATTTCGTCATGTTTGAAGGTGCGCAGGGTACGCTTCTGGATATCGACCACGGTACTTATCCGTACGTAACCTCTTCCAACACCACTGCGGGTG…	TGCTCGTAAACTGGGCGTCGATATTGACAACCTGCTGTGTTCCCAGCCGGACACTGGCGAACAGGCGCTGGAAATCTGTGACGCCCTGGCGCGCTCTGGCGCAGTAGACGTTATCGTTGTTGACTCCGTAGCGGCACTGACGCCGAAAGCGGAAATCGAAGGTGAAATCGGCGACTCTCACATGGGCCTTGCGGCACGTATGATGAGCCAGGCGATGCGTAAGCTGGCGGGTAACCTGAAGCAGTCCAACACGCTGCTGATCTTCATCAACCAGATCCGTATGAAAATTGGTGTGATGTTCGGTAACCCGGAAACCACTACCGGTGGTAACGCGCTGAAATTCTACGCCTCTGTTCGTCTCGACATCCGTCGTATCGGCGCGGTGAAAGAGGGCGAAAA…
3251	GGGGAAAGGGACTCAGGCTCAGTTCATCATGGAGAAATATGGTATTCCGCAAATCTCCACAGGTGATATGCTGCGTGCTGCGGTCAAATCTGGCTCCGAGCTGGGTAAACAAGCAAAAGACATTATGGACGCTGGCAAACTGGTTACCGATGAACTGGTGATCGCGCTGGTTAAAGAACGTATTGCTCAGGAAGACTGCCGTAACGGTTTCCTGCTTGACGGCTTCCCGCGTACTATTCCGCAGGCTGACGCGATGAAAGAAGCGGGCATCAATGTTGATTACGTTCTGGAGTTCGACGTACCGGACGAACTGATTGTTGATCGTATTGTTGGTCGCCGCGTTCACGCGCCATCTGGCCGTGTTTATCACGTTAAATTCAATCCGCCGAAAGTAGAAGG…	CGAGAGCCATTCGCCAGGCGGCGGATGAAGTGCTGGCAGGGCAACATGATGATGAGTTCCCGCTGGCAATCTGGCAAACGGGATCTGGTACGCAAAGCAATATGAATATGAATGAAGTACTGGCTAACCGGGCCAGCGAATTGCTTGGCGGCGTACGCGGAATGGAACGTAAAGTTCACCCTAACGATGACGTGAACAAAAGCCAAAGCTCCAATGATGTCTTCCCAACTGCTATGCACGTAGCGGCGTTATTGGCACTGCGTAAGCAACTCATTCCTCAGCTCAAAAACCTCACTCAAACTCTGAATGAGAAATCGCGCGCATTTGCCGATATCGTCAAAATTGGTCGTACCCACTTGCAGGACGCCACACCGCTGACCCTGGGACAGGAGATTTCTG…	GGTCTGCACGGCGTTGGTGTTTCGGTAGTAAACGCCCTGTCGCAAAAACTGGAGCTGGTTATTCAGCGCGAGGGTAAAATTCACCGTCAGATCTACGAACACGGTGTTCCGCAGGCACCGCTGGCGGTTACTGGTGACACCGACAAAACCGGCACCATGGTGCGTTTCTGGCCAAGCCTTGAAACTTTCACCAATGTGACCGAGTTCGAATACGATATTCTGGCGAAGCGTCTGCGTGAGCTGTCCTTCCTCAACTCCGGCGTGTCTATTCGTCTGAAAGACAAACGCGACGGCAAAGAAGACCACTTCCACTATGAAGGCGGCATTAAGGCGTTCGTTGAATATCTGAACAAGAACAAAACGCCGATTCACCCGAACATCTTCTACTTCTCCACCGAA…	CGACGCTGCCGTCGAGAAAGCCTATAAAGGCGAGCGTAAAATCTCCTGGATGGAAATTTACACCGGTGAAAAATCCACACAGGTTTATGGTCAGGACGTCTGGCTGCCTGCTGAAACCCTTGATCTGATTCGTGAATATCGCGTTGCTATCAAAGGCCCGCTGACCACTCCGGTTGGCGGCGGTATTCGTTCTCTTAACGTTGCCCTGCGCCAGGAGCTGGATCTTTACATCTGCCTGCGTCCGGTACGTTACTACCAGGGCACCCCAAGCCAGGTTAAACACCCTGAACTGACCGATATGGTTATCTTCCGTGAAAACTCGGAAGACATTTATGCGGGTATCGAATGGAAAGCTGACTCTGCCGACGCAGAGAAAGTGATTAAATTCCTGCGTGAAGA…	GGTGTAGCGCGTAAACCGGGTATGGATCGTTCCGACCTGTTTAACGTTAACGCCGGTATTGTAAAGAATCTGGTTCAGCAAGTTGCGAAAACTTGCCCGAAAGCGTGCATTGGCATTATCACTAACCCGGTTAACACCACTGTGGCTATCGCTGCGGAAGTGCTGAAAAAAGCCGGTGTTTATGACAAAAACAAGCTGTTTGGCGTTACTACGCTGGATATTATTCGTTCCAACACCTTTGTCGCGGAACTGAAAGGTAAACAACCGGGTGATGTAGAAGTGCCGGTTATTGGCGGTCACTCTGGCGTTACTATTCTGCCGCTGCTGTCACAGGTTCCTGGCATCAGTTTTACCGAGCAGGAAGTCGCAGATCTGACCAAACGTATCCAGAACGCGGGC…	ATAACGCGCGTGAGAAAGCGCGCGGCGCGAAAGCGATCGGCACCACGGGGCGTGGTATCGGGCCTGCTTATGAAGATAAAGTGGCACGTCGCGGTCTGCGTGTTGGCGACCTTTTCGACAAAGAAACCTTCGCTGAAAAACTGAAAGAAGTGATGGAATATCACAACTTCCAGTTGGTTAACTACTACAAAGTTGAAGCGGTTGATTACCAGAAAGTTCTGGATGATGTGATGGCCGTTGCCGACATCCTGACTTCCATGGTGGTTGACGTTTCTGACCTGCTTGACCAGGCGCGTCAGCGTGGCGATTTCGTCATGTTTGAAGGTGCGCAGGGTACGCTTCTGGATATCGACCACGGTACTTATCCGTACGTAACCTCTTCCAACACCACTGCGGGCG…	TGCTCGTAAACTGGGCGTCGATATCGACAACCTGCTGTGTTCCCAGCCGGACACTGGCGAACAGGCGCTGGAAATCTGTGACGCCCTGGCGCGCTCTGGCGCAGTAGACGTTATCGTTGTTGACTCCGTAGCGGCACTGACGCCGAAAGCGGAAATCGAAGGTGAAATCGGCGACTCTCACATGGGCCTTGCGGCACGTATGATGAGCCAGGCGATGCGTAAGCTGGCGGGTAACCTGAAGCAGTCCAACACGCTGCTGATCTTCATCAACCAGATCCGTATGAAAATTGGTGTGATGTTCGGTAACCCGGAAACCACTACCGGTGGTAACGCGCTGAAATTCTACGCCTCTGTTCGTCTCGACATCCGTCGTATCGGCGCGGTGAAAGAGGGCGAAAA…
3252	GGGGAAAGGGACTCAGGCTCAGTTCATCATGGAGAAATATGGTATTCCGCAAATCTCCACAGGTGATATGCTGCGTGCTGCGGTCAAATCTGGCTCCGAGCTGGGTAAACAAGCAAAAGACATTATGGACGCTGGCAAACTGGTTACCGATGAACTGGTGATCGCGCTGGTTAAAGAACGTATTGCTCAGGAAGACTGCCGTAACGGTTTCCTGCTTGACGGCTTCCCGCGTACTATTCCGCAGGCTGACGCGATGAAAGAAGCGGGCATCAATGTTGATTACGTTCTGGAGTTCGACGTACCGGACGAACTGATTGTTGATCGTATTGTTGGTCGCCGCGTTCACGCGCCATCTGGCCGTGTTTATCACGTTAAATTCAATCCGCCGAAAGTAGAAGG…	CGAGAGCTATTCGCCAGGCGGCGGATGAAGTGCTGGCAGGGCAACATGATGATGAGTTCCCGCTGGCAATCTGGCAAACGGGATCTGGTACGCAAAGCAATATGAATATGAATGAAGTACTGGCTAACCGGGCCAGCGAATTGCTTGGCGGCGTACGCGGAATGGAACGTAAAGTTCACCCTAACGATGACGTGAACAAAAGCCAAAGCTCCAATGATGTCTTCCCAACTGCTATGCACGTGGCGGCGTTATTGGCACTGCGTAAGCAACTCATTCCTCAGCTCAAAAACCTCACTCAAACTCTGAATGAGAAATCGCGCGCATTTGCCGATATCGTCAAAATTGGTCGTACCCACTTGCAGGACGCCACACCGCTGACTCTGGGACAGGAGATTTCTG…	GGTCTGCACGGCGTTGGTGTTTCGGTAGTAAACGCCCTGTCGCAAAAACTGGAGCTGGTTATTCAGCGCGAGGGTAAAATTCACCGTCAGATCTACGAACACGGTGTTCCGCAGGCACCGCTGGCGGTTACTGGTGACACCGACAAAACCGGCACCATGGTGCGTTTCTGGCCAAGCCTTGAAACTTTCACCAATGTGACCGAGTTCGAATACGATATTCTGGCGAAGCGTCTGCGTGAGCTGTCCTTCCTCAATTCCGGCGTGTCTATTCGTCTGAAAGACAAACGCGACGGCAAAGAAGACCACTTCCACTATGAAGGCGGCATTAAGGCGTTCGTTGAATATCTGAACAAGAACAAAACGCCGATTCACCCGAACATCTTCTACTTCTCCACCGAA…	CGATGCTGCCGTCGAGAAAGCCTATAAAGGTGAGCGTAAAATCTCCTGGATGGAAATTTACACCGGTGAAAAATCCACACAGGTTTATGGTCAGGACGTCTGGCTGCCTGCTGAAACCCTTGATCTGATTCGTGAATATCGCGTTGCTATCAAAGGCCCTCTGACCACTCCGGTTGGCGGCGGTATTCGTTCTCTTAACGTTGCCCTGCGCCAGGAGCTGGATCTTTACATCTGCCTGCGTCCGGTACGTTACTACCAGGGCACTCCAAGCCCGGTTAAACACCCTGAACTGACCGATATGGTTATCTTCCGTGAAAACTCGGAAGACATTTATGCGGGTATCGAATGGAAAGCTGACTCTGCCGACGCAGAGAAAGTGATTAAATTCCTGCGTGAAGA…	GGTGTAGCGCGTAAACCGGGTATGGATCGTTCCGACCTGTTTAACGTTAACGCCGGTATTGTGAAGAATCTGGTTCAGCAAGTTGCGAAAACTTGCCCGAAAGCGTGCATTGGCATTATCACTAACCCGGTTAACACCACTGTGGCTATCGCTGCGGAAGTGCTGAAAAAAGCCGGTGTTTATGACAAAAACAAGCTGTTTGGCGTTACTACGCTGGATATTATTCGTTCCAACACCTTTGTCGCGGAACTGAAAGGTAAACAACCGGGTGATGTAGAAGTGCCGGTTATTGGCGGTCACTCTGGCGTTACTATTCTGCCGCTGCTGTCACAGGTTCCTGGCGTCAGTTTTACCGAGCAGGAAGTCGCAGATCTGACCAAACGTATCCAGAACGCGGGT…	ATAACGCGCGTGAGAAAGCGCGTGGCGCGAAAGCGATCGGCACCACGGGGCGTGGTATCGGGCCTGCTTATGAAGATAAAGTGGCACGTCGCGGTCTGCGTGTTGGCGACCTTTTCGACAAAGAAACCTTCGCTGAAAAACTGAAAGAAGTGATGGAATATCACAACTTCCAGTTGGTTAACTACTACAAAGTTGAAGCGGTTGATTACCAGAAAGTTCTGGATGATGTGATGGCCGTTGCCGACATCCTGACTTCCATGGTGGTTGACGTTTCTGACCTGCTCGATCAGGCGCGTCAGCGTGGCGATTTCGTCATGTTTGAAGGTGCGCAGGGTACGCTTCTGGATATCGACCACGGTACTTATCCGTACGTAACCTCTTCCAACACCACTGCGGGTG…	TGCTCGTAAACTGGGCGTCGATATCGACAACCTGCTGTGTTCCCAGCCGGACACTGGCGAACAGGCGCTGGAAATCTGTGACGCCCTGGCGCGCTCTGGCGCAGTAGATGTTATCGTTGTTGACTCCGTAGCGGCACTGACGCCGAAAGCGGAAATCGAAGGTGAAATCGGCGACTCTCACATGGGCCTTGCGGCACGTATGATGAGCCAGGCGATGCGTAAGCTGGCGGGTAACCTGAAGCAGTCCAACACGCTGCTGATCTTCATCAACCAGATCCGTATGAAAATTGGTGTGATGTTCGGTAACCCGGAAACCACTACCGGTGGTAACGCGCTGAAATTCTACGCCTCTGTTCGTCTCGACATCCGTCGTATCGGCGCGGTGAAAGAGGGCGAAAA…
3254	GGGGAAAGGGACTCAGGCTCAGTTCATCATGGAGAAATATGGTATTCCGCAAATCTCCACAGGTGATATGCTGCGTGCTGCGGTCAAATCTGGCTCCGAGCTGGGTAAACAAGCAAAAGACATTATGGACGCTGGCAAACTGGTTACCGATGAACTGGTGATCGCGCTGGTTAAAGAACGTATTGCTCAGGAAGACTGCCGTAACGGTTTCCTGCTTGACGGCTTCCCGCGTACTATTCCGCAGGCTGACGCGATGAAAGAAGCGGGCATCAATGTTGATTACGTTCTGGAGTTCGACGTACCGGACGAACTGATTGTTGATCGTATTGTTGGTCGCCGCGTTCACGCGCCATCTGGCCGTGTTTATCACGTTAAATTCAATCCGCCGAAAGTAGAAGG…	CGAGAGCCATTCGCCAGGCGGCGGATGAAGTGCTGGCAGGACAACATGATGATGAGTTCCCGCTGGCAATCTGGCAAACGGGATCCGGTACGCAAAGCAATATGAATATGAATGAAGTACTGGCTAATCGGGCCAGCGAATTGCTTGGCGGCGTACGCGGAATGGAACGTAAAGTTCACCCTAACGATGACGTGAACAAAAGCCAAAGCTCCAATGATGTCTTCCCAACTGCTATGCACGTAGCGGCGTTATTGGCACTGCGTAAGCAACTCATTCCTCAGCTCAAAAACCTCACTCAAACTCTGAATGAGAAATCGCGCGCATTTGCCGATATCGTCAAAATTGGTCGTACCCACTTGCAGGACGCCACACCGCTGACCCTGGGACAGGAGATTTCTG…	GGTCTGCACGGCGTTGGTGTTTCGGTAGTAAACGCCCTGTCGCAAAAACTGGAGCTGGTTATTCAGCGCGAGGGTAAAATTCACCGTCAGATCTACGAACACGGTGTTCCGCAGGCACCGCTGGCGGTTACTGGTGACACCGACAAAACCGGCACCATGGTGCGTTTCTGGCCAAGCCTTGAAACTTTCACCAATGTGACCGAGTTCGAATACGATATTCTGGCGAAGCGTCTGCGTGAGCTGTCCTTCCTCAATTCCGGCGTGTCTATTCGTCTGAAAGACAAACGCGACGGCAAAGAAGACCACTTCCACTATGAAGGCGGCATTAAGGCGTTCGTTGAATATCTGAACAAGAACAAAACGCCGATTCACCCGAACATCTTCTACTTCTCCACCGAA…	CGACGCTGCCGTCGAGAAAGCCTATAAAGGCGAGCGTAAAATCTCCTGGATGGAAATTTACACCGGTGAAAAATCCACACAGGTTTATGGTCAGGACGTCTGGTTGCCTGCTGAAACCCTTGATCTGATTCGTGAATATCGCGTTGCCATTAAAGGCCCGCTGACCACTCCGGTTGGTGGCGGTATTCGCTCTCTGAACGTTGCCCTGCGCCAGGAACTGGATCTCTACATCTGCCTGCGTCCGGTACGTTACTACCAGGGCACCCCAAGCCCGGTTAAACACCCTGAACTGACCGATATGGTTATCTTCCGTGAAAACTCGGAAGACATTTATGCGGGTATCGAATGGAAAGCTGACTCTGCCGACGCAGAGAAAGTGATCAAATTCCTGCGTGAAGA…	GGTGTAGCGCGTAAACCGGGTATGGATCGTTCCGACCTGTTTAACGTTAACGCCGGTATTGTAAAGAATCTGGTTCAGCAAGTTGCGAAAACTTGCCCGAAAGCGTGCATTGGCATTATCACTAACCCGGTTAACACCACTGTGGCTATCGCTGCGGAAGTGCTGAAAAAAGCCGGTGTTTATGACAAAAACAAGCTGTTTGGCGTTACTACGCTGGATATTATTCGTTCCAACACCTTTGTCGCGGAACTGAAAGGTAAACAACCGGGTGATGTAGAAGTGCCTGTTATTGGCGGTCACTCTGGCGTTACTATTCTGCCGCTGCTGTCACAGGTTCCTGGCGTCAGTTTTACCGAGCAGGAAGTCGCAGATCTGACCAAACGTATCCAGAACGCGGGC…	ATAACGCGCGTGAGAAAGCGCGTGGCGCGAAAGCGATCGGCACCACGGGGCGTGGTATCGGGCCTGCTTATGAAGATAAAGTGGCACGTCGCGGTCTGCGTGTTGGCGACCTTTTCGACAAAGAAACCTTCGCTGAAAAACTGAAAGAAGTGATGGAATATCACAACTTCCAGTTGGTTAACTACTACAAAGTTGAAGCGGTTGATTACCAGAAAGTTCTGGATGATGTGATGGCCGTTGCCGACATCCTGACTTCCATGGTGGTTGACGTTTCTGACCTGCTCGATCAGGCGCGTCAGCGTGGCGATTTCGTCATGTTTGAAGGTGCGCAGGGTACGCTTCTGGATATCGACCACGGTACTTATCCGTACGTAACCTCTTCCAACACCACTGCGGGTG…	TGCTCGTAAACTGGGCGTCGATATCGACAACCTGCTGTGTTCCCAGCCGGACACTGGCGAACAGGCGCTGGAAATCTGTGACGCCCTGGCGCGCTCTGGCGCAGTAGATGTTATCGTTGTTGACTCCGTAGCGGCACTGACGCCGAAAGCGGAAATCGAAGGTGAAATCGGCGACTCTCACATGGGCCTTGCGGCACGTATGATGAGCCAGGCGATGCGTAAGCTGGCGGGTAACCTGAAGCAGTCCAACACGCTGCTGATCTTCATCAACCAGATCCGTATGAAAATTGGTGTGATGTTCGGTAACCCGGAAACCACTACCGGTGGTAACGCGCTGAAATTCTACGCCTCTGTTCGTCTCGACATCCGTCGTATCGGCGCGGTGAAAGAGGGCGAAAA…
3255	GGGGAAAGGGACTCAGGCTCAGTTCATCATGGAGAAATATGGTATTCCGCAAATCTCCACAGGTGATATGCTGCGTGCTGCGGTCAAATCTGGCTCCGAGCTGGGTAAACAAGCAAAAGACATTATGGACGCTGGCAAACTGGTTACCGATGAACTGGTGATCGCGCTGGTTAAAGAACGTATTGCTCAGGAAGACTGCCGTAACGGTTTCCTGCTTGACGGCTTCCCGCGTACTATTCCGCAGGCTGACGCGATGAAAGAAGCGGGCATCAATGTTGATTACGTTCTGGAGTTCGACGTACCGGACGAACTGATTGTTGATCGTATTGTTGGTCGCCGCGTTCACGCGCCATCTGGCCGTGTTTATCACGTTAAATTCAATCCGCCGAAAGTAGAAGG…	CGAGAGCTATTCGCCAGGCGGCGGATGAAGTGCTGGCAGGGCAACATGATGATGAGTTCCCGCTGGCAATCTGGCAAACGGGATCTGGTACGCAAAGCAATATGAATATGAATGAAGTACTGGCTAACCGGGCCAGCGAATTGCTTGGCGGCGTACGCGGAATGGAACGTAAAGTTCACCCTAACGATGACGTGAACAAAAGCCAAAGCTCCAATGATGTCTTCCCAACTGCTATGCACGTGGCGGCGTTATTGGCACTGCGTAAGCAACTCATTCCTCAGCTCAAAAACCTCACTCAAACTCTGAATGAGAAATCGCGCGCATTTGCCGATATCGTCAAAATTGGTCGTACCCACTTGCAGGACGCCACACCGCTGACTCTGGGACAGGAGATTTCTG…	GGTCTGCACGGCGTTGGTGTTTCGGTAGTAAACGCCCTGTCGCAAAAACTGGAGCTGGTTATTCAGCGCGAGGGTAAAATTCACCGTCAGATCTACGAACACGGTGTTCCGCAGGCACCGCTGGCGGTTACTGGTGACACCGACAAAACCGGCACCATGGTGCGTTTCTGGCCAAGCCTTGAAACTTTCACCAATGTGACCGAGTTCGAATACGATATTCTGGCGAAGCGTCTGCGTGAGCTGTCCTTCCTCAATTCCGGCGTGTCTATTCGTCTGAAAGACAAACGCGACGGCAAAGAAGACCACTTCCACTATGAAGGCGGCATTAAGGCGTTCGTTGAATATCTGAACAAGAACAAAACGCCGATTCACCCGAACATCTTCTACTTCTCCACCGAA…	CGACGCTGCCGTCGAGAAAGCCTATAAAGGCGAGCGTAAAATCTCCTGGATGGAAATTTACACCGGTGAAAAATCCACACAGGTTTATGGTCAGGACGTCTGGTTGCCTGCTGAAACCCTTGATCTGATTCGTGAATATCGCGTTGCTATCAAAGGCCCTCTGACCACTCCGGTTGGCGGCGGTATTCGTTCTCTTAACGTTGCCCTGCGCCAGGAGCTGGATCTTTACATCTGCCTGCGTCCGGTACGTTACTACCAGGGCACCCCAAGCCCGGTTAAACACCCTGAACTGACCGATATGGTTATCTTCCGTGAAAACTCGGAAGACATTTATGCGGGTATCGAATGGAAAGCTGACTCTGCCGACGCTGAGAAAGTGATCAAATTCCTGCGTGAAGA…	GGTGTAGCGCGTAAACCGGGTATGGATCGTTCCGACCTGTTTAACGTTAACGCCGGTATTGTGAAGAATCTGGTTCAGCAAGTTGCGAAAACTTGCCCGAAAGCGTGCATTGGCATTATCACTAACCCGGTTAACACCACTGTGGCTATCGCTGCGGAAGTGCTGAAAAAAGCCGGTGTTTATGACAAAAACAAGCTGTTTGGCGTTACTACGCTGGATATTATTCGTTCCAACACCTTTGTCGCGGAACTGAAAGGTAAACAACCGGGTGATGTAGAAGTGCCGGTTATTGGCGGTCACTCTGGCGTTACTATTCTGCCGCTGCTGTCACAGGTTCCTGGCGTCAGTTTTACCGAGCAGGAAGTCGCAGATCTGACCAAACGTATCCAGAACGCGGGT…	ATAACGCGCGTGAGAAAGCGCGTGGCGCGAAAGCGATCGGCACCACGGGGCGTGGTATCGGGCCTGCTTATGAAGATAAAGTGGCACGTCGCGGTCTGCGTGTTGGCGACCTTTTCGACAAAGAAACCTTCGCTGAAAAACTGAAAGAAGTGATGGAATATCACAACTTCCAGTTGGTTAACTACTACAAAGTTGAAGCGGTTGATTACCAGAAAGTTCTGGATGATGTGATGGCCGTTGCCGACATCCTGACTTCCATGGTGGTTGACGTTTCTGACCTGCTCGATCAGGCGCGTCAGCGTGGCGATTTCGTCATGTTTGAAGGTGCGCAGGGTACGCTTCTGGATATCGACCACGGTACTTATCCGTACGTAACCTCTTCCAACACCACTGCGGGCG…	TGCTCGTAAACTGGGCGTCGATATCGACAACCTGCTGTGTTCCCAGCCGGACACTGGCGAACAGGCGCTGGAAATCTGTGACGCCCTGGCGCGCTCTGGCGCAGTAGATGTTATCGTTGTTGACTCCGTAGCGGCACTGACGCCGAAAGCGGAAATCGAAGGTGAAATCGGCGACTCTCACATGGGCCTTGCGGCACGTATGATGAGCCAGGCGATGCGTAAGCTGGCGGGTAACCTGAAGCAGTCCAACACGCTGCTGATCTTCATCAACCAGATCCGTATGAAAATTGGTGTGATGTTCGGTAACCCGGAAACCACTACCGGTGGTAACGCGCTGAAATTCTACGCCTCTGTTCGTCTCGACATCCGTCGTATCGGCGCGGTGAAAGAGGGCGAAAA…
3256	GGGGAAAGGGACTCAGGCTCAGTTCATCATGGAGAAATATGGTATTCCGCAAATCTCCACAGGTGATATGCTGCGTGCTGCGGTCAAATCTGGCTCCGAGCTGGGTAAACAAGCAAAAGACATTATGGACGCTGGCAAACTGGTTACCGATGAACTGGTGATCGCGCTGGTTAAAGAACGTATTGCTCAGGAAGACTGCCGTAACGGTTTCCTGCTTGACGGCTTCCCGCGTACTATTCCGCAGGCTGACGCGATGAAAGAAGCGGGCATCAATGTTGATTACGTTCTGGAGTTCGACGTACCGGACGAACTGATTGTTGATCGTATTGTTGGTCGCCGCGTTCACGCGCCATCTGGCCGTGTTTATCACGTTAAATTCAATCCGCCGAAAGTAGAAGG…	CGAGAGCTATTCGCCAGGCGGCGGATGAAGTGCTGGCAGGGCAACATGATGATGAGTTCCCGCTGGCAATCTGGCAAACGGGATCTGGTACGCAAAGCAATATGAATATGAATGAAGTACTGGCTAACCGGGCCAGCGAATTGCTTGGCGGCGTACGCGGAATGGAACGTAAAGTTCACCCTAACGATGACGTGAACAAAAGCCAAAGCTCCAATGATGTCTTCCCAACTGCTATGCACGTGGCGGCGTTATTGGCACTGCGTAAGCAACTCATTCCTCAGCTCAAAAACCTCACTCAAACTCTGAATGAGAAATCGCGCGCATTTGCCGATATCGTCAAAATTGGTCGTACCCACTTGCAGGACGCCACACCGCTGACTCTGGGACAGGAGATTTCTG…	GGTCTGCACGGCGTTGGTGTTTCGGTAGTAAACGCCCTGTCGCAAAAACTGGAGCTGGTTATTCAGCGCGAGGGTAAAATTCACCGTCAGATCTACGAACACGGTGTTCCGCAGGCACCGCTGGCGGTTACTGGTGACACCGACAAAACCGGCACCATGGTGCGTTTCTGGCCAAGCCTTGAAACTTTCACCAATGTGACCGAGTTCGAATACGATATTCTGGCGAAGCGTCTGCGTGAGCTGTCCTTCCTCAATTCCGGCGTGTCTATTCGTCTGAAAGACAAACGCGACGGCAAAGAAGACCACTTCCACTATGAAGGCGGCATTAAGGCGTTCGTTGAATATCTGAACAAGAACAAAACGCCGATTCACCCGAACATCTTCTACTTCTCCACCGAA…	CGATGCTGCCGTCGAGAAAGCCTATAAAGGTGAGCGTAAAATCTCCTGGATGGAAATTTACACCGGTGAAAAATCCACACAGGTTTATGGTCAGGACGTCTGGCTGCCTGCTGAAACCCTTGATCTGATTCGTGAATATCGCGTTGCTATCAAAGGCCCTCTGACCACTCCGGTTGGCGGCGGTATTCGTTCTCTTAACGTTGCCCTGCGCCAGGAGCTGGATCTTTACATCTGCCTGCGTCCGGTACGTTACTACCAGGGCACTCCAAGCCCGGTTAAACACCCTGAACTGACCGATATGGTTATCTTCCGTGAAAACTCGGAAGACATTTATGCGGGTATCGAATGGAAAGCTGACTCTGCCGACGCTGAGAAAGTGATCAAATTCCTGCGTGAAGA…	GGTGTAGCGCGTAAACCGGGTATGGATCGTTCCGACCTGTTTAACGTTAACGCCGGTATTGTGAAGAATCTGGTTCAGCAAGTTGCGAAAACTTGCCCGAAAGCGTGCATTGGCATTATCACTAACCCGGTTAATACCACTGTGGCTATCGCTGCGGAAGTGCTGAAAAAAGCCGGTGTTTATGACAAAAACAAGCTGTTTGGCGTTACTACGCTGGATATTATTCGTTCCAACACCTTTGTCGCGGAACTGAAAGGTAAACAACCGGGTGATGTAGAAGTGCCGGTTATTGGCGGTCACTCTGGCGTTACTATTCTGCCGCTGCTGTCACAGGTTCCTGGCGTCAGTTTTACCGAGCAGGAAGTCGCAGATCTGACCAAACGTATCCAGAACGCGGGT…	ATAACGCGCGTGAGAAAGCGCGTGGCGCGAAAGCGATCGGCACCACGGGGCGTGGTATCGGGCCTGCTTATGAAGATAAAGTGGCACGTCGCGGTCTGCGTGTTGGCGACCTTTTCGACAAAGAAACCTTCGCTGAAAAACTGAAAGAAGTGATGGAATATCACAACTTCCAGTTGGTTAACTACTACAAAGTTGAAGCGGTTGATTACCAGAAAGTTCTGGATGATGTGATGGCCGTTGCCGACATCCTGACTTCCATGGTGGTTGACGTTTCTGACCTGCTCGATCAGGCGCGTCAGCGTGGCGATTTCGTCATGTTTGAAGGTGCGCAGGGTACGCTTCTGGATATCGACCACGGTACTTATCCGTACGTAACCTCTTCCAACACCACTGCGGGTG…	TGCTCGTAAACTGGGCGTCGATATCGACAACCTGCTGTGTTCCCAGCCGGACACTGGCGAACAGGCGCTGGAAATCTGTGACGCCCTGGCGCGCTCTGGCGCAGTAGATGTTATCGTTGTTGACTCCGTAGCGGCACTGACGCCGAAAGCGGAAATCGAAGGTGAAATCGGCGACTCTCACATGGGCCTTGCGGCACGTATGATGAGCCAGGCGATGCGTAAGCTGGCGGGTAACCTGAAGCAGTCCAACACGCTGCTGATCTTCATCAACCAGATCCGTATGAAAATTGGTGTGATGTTCGGTAACCCGGAAACCACTACCGGTGGTAACGCGCTGAAATTCTACGCCTCTGTTCGTCTCGACATCCGTCGTATCGGCGCGGTGAAAGAGGGCGAAAA…
3257	GGGGAAAGGGACTCAGGCTCAGTTCATCATGGAGAAATATGGTATTCCGCAAATCTCCACAGGTGATATGCTGCGTGCCGCAGTCAAATCTGGCTCCGAGCTGGGTAAACAAGCAAAAGACATTATGGACGCTGGCAAACTGGTTACCGATGAACTGGTGATCGCGCTGGTTAAAGAACGTATTGCTCAGGAAGACTGCCGTAACGGTTTCCTGCTTGACGGCTTCCCGCGTACTATTCCGCAGGCTGACGCGATGAAAGAAGCGGGCATCAATGTTGATTACGTTCTGGAGTTCGACGTACCGGACGAACTGATTGTTGATCGTATTGTTGGTCGCCGCGTTCACGCGCCATCTGGCCGTGTTTATCACGTTAAATTTAATCCGCCGAAAGTAGAAGG…	CGAGAGCCATTCGCCAGGCGGCGGATGAAGTGCTGGCAGGACAACATGATGATGAGTTCCCGCTGGCAATCTGGCAAACGGGATCCGGTACGCAAAGCAATATGAATATGAATGAAGTACTGGCTAACCGGGCCAGCGAATTGCTTGGCGGCGTACGCGGAATGGAACGTAAAGTTCACCCTAACGATGACGTGAACAAAAGCCAAAGCTCCAATGATGTCTTCCCAACTGCTATGCACGTGGCGGCGTTATTGGCACTGCGTAAGCAACTCATTCCTCAGCTCAAAAACCTCACTCAAACTCTGAATGAGAAATCGCGCGCATTTGCCGATATCGTCAAAATTGGTCGTACCCACTTGCAGGACGCCACACCGCTGACTCTGGGACAGGAGATTTCTG…	GGTCTGCACGGCGTTGGTGTTTCGGTAGTAAACGCCCTGTCGCAAAAACTGGAGCTGGTTATTCAGCGCGAGGGTAAAATTCACCGTCAGATCTACGAACACGGTGTTCCGCAGGCACCGCTGGCGGTTACTGGTGACACCGACAAAACCGGCACCATGGTGCGTTTCTGGCCAAGCCTTGAAACTTTCACCAATGTGACCGAGTTCGAATACGATATTCTGGCGAAGCGTCTGCGTGAGCTGTCCTTCCTCAACTCCGGCGTGTCTATTCGTCTGAAAGACAAACGCGACGGCAAAGAAGACCACTTCCACTATGAAGGCGGCATTAAGGCGTTCGTTGAATATCTGAACAAGAACAAAACGCCGATTCACCCGAACATCTTCTACTTCTCCACCGAA…	CGATGCTGCCGTCGAGAAAGCCTATAAAGGTGAGCGTAAAATCTCCTGGATGGAAATTTACACCGGTGAAAAATCCACACAGGTTTATGGTCAGGACGTCTGGCTGCCTGCTGAAACCCTTGATCTGATTCGTGAATATCGCGTTGCTATCAAAGGCCCTCTGACCACTCCGGTTGGCGGCGGTATTCGTTCTCTTAACGTTGCCCTGCGTCAGGAGCTGGATCTTTACATCTGCCTGCGTCCGGTACGTTACTACCAGGGCACCCCAAGCCCGGTTAAACACCCTGAACTGACCGATATGGTTATCTTCCGTGAAAACTCGGAAGACATTTATGCGGGTATCGAATGGAAAGCTGACTCTGCCGACGCTGAGAAAGTGATCAAATTCCTGCGTGAAGA…	GGTGTAGCGCGTAAACCGGGTATGGATCGTTCCGACCTGTTTAACGTTAACGCCGGTATTGTGAAGAATCTGGTTCAGCAAGTTGCGAAAACTTGCCCGAAAGCGTGCATTGGCATTATCACTAACCCGGTTAACACCACTGTGGCTATCGCTGCGGAAGTGCTGAAAAAAGCCGGTGTTTATGACAAAAACAAGCTGTTTGGCGTTACTACGCTGGATATTATTCGTTCCAACACCTTTGTCGCGGAACTGAAAGGTAAACAACCGGGTGATGTAGAAGTGCCGGTTATTGGCGGTCACTCTGGCGTTACTATTCTGCCGCTGCTGTCACAGGTTCCTGGCATCAGTTTTACCGAGCAGGAAGTCGCAGATCTGACCAAACGTATCCAGAACGCGGGC…	ATAACGCGCGTGAGAAAGCGCGTGGCGCGAAAGCGATCGGCACCACGGGGCGTGGTATCGGGCCTGCTTATGAAGATAAAGTGGCACGTCGCGGTCTGCGTGTTGGCGACCTTTTCGACAAAGAAACCTTCGCTGAAAAACTGAAAGAAGTGATGGAATATCACAACTTCCAGTTGGTTAACTACTACAAAGTTGAAGCGGTTGATTACCAGAAAGTTCTGGATGATGTGATGGCCGTTGCTGACATCCTGACTTCCATGGTGGTTGACGTTTCTGACCTGCTTGACCAGGCGCGTCAGCGTGGCGATTTCGTCATGTTTGAAGGTGCGCAGGGTACGCTTCTGGATATCGACCACGGTACTTATCCGTACGTAACCTCTTCCAACACCACTGCGGGCG…	TGCTCGTAAACTGGGCGTCGATATCGACAACCTGCTGTGTTCCCAGCCGGACACTGGCGAACAGGCGCTGGAAATCTGTGACGCCCTGGCGCGCTCTGGCGCAGTAGACGTTATCGTTGTTGACTCCGTAGCGGCACTGACGCCGAAAGCGGAAATCGAAGGTGAAATCGGCGACTCTCACATGGGTCTTGCGGCACGTATGATGAGCCAGGCGATGCGTAAGCTGGCGGGTAACCTGAAGCAGTCCAACACGCTGCTGATCTTCATCAACCAGATCCGTATGAAAATTGGTGTGATGTTCGGTAACCCGGAAACCACTACCGGTGGTAACGCGCTGAAATTCTACGCCTCTGTTCGTCTCGACATCCGTCGTATCGGCGCGGTGAAAGAGGGCGAAAA…
3260	GGGGAAAGGGACTCAGGCTCAGTTCATCATGGAGAAATATGGTATTCCGCAAATCTCCACAGGTGATATGCTGCGTGCTGCGGTCAAATCTGGCTCCGAGCTGGGTAAACAAGCAAAAGACATTATGGACGCTGGCAAACTGGTTACCGATGAACTGGTGATCGCGCTGGTTAAAGAACGTATTGCTCAGGAAGACTGCCGTAACGGTTTCCTGCTTGACGGCTTCCCGCGTACTATTCCGCAGGCTGACGCGATGAAAGAAGCGGGCATCAATGTTGATTACGTTCTGGAGTTCGACGTACCGGACGAACTGATTGTTGATCGTATTGTTGGTCGCCGCGTTCACGCGCCATCTGGCCGTGTTTATCACGTTAAATTCAATCCGCCGAAAGTAGAAGG…	CGAGAGCCATTCGCCAGGCGGCGGATGAAGTGCTGGCAGGACAACATGATGATGAGTTCCCGCTGGCAATCTGGCAAACGGGATCCGGTACGCAAAGCAATATGAATATGAATGAAGTACTGGCTAATCGGGCCAGCGAATTGCTTGGCGGCGTACGCGGAATGGAACGTAAAGTTCACCCTAACGATGACGTGAACAAAAGCCAAAGCTCCAATGATGTCTTCCCAACTGCTATGCACGTAGCGGCGTTATTGGCACTGCGTAAGCAACTCATTCCTCAGCTCAAAAACCTCACTCAAACTCTGAATGAGAAATCGCGTGCATTTGCCGATATCGTCAAAATTGGTCGTACCCACTTGCAGGACGCCACACCGCTGACCCTGGGACAGGAGATTTCTG…	GGTCTGCACGGCGTTGGTGTTTCGGTAGTAAACGCCCTGTCGCAAAAACTGGAGCTGGTTATTCAGCGCGAGGGTAAAATTCACCGTCAGATCTACGAACACGGTGTTCCGCAGGCACCGCTGGCGGTTACTGGTGACACCGACAAAACCGGCACCATGGTGCGTTTCTGGCCAAGCCTTGAAACTTTCACCAATGTGACCGAGTTCGAATACGATATTCTGGCGAAGCGTCTGCGTGAGCTGTCCTTCCTCAATTCCGGCGTGTCTATTCGTCTGAAAGACAAACGCGACGGCAAAGAAGACCACTTCCACTATGAAGGCGGCATTAAGGCGTTCGTTGAATATCTGAACAAGAACAAAACGCCGATTCACCCGAACATCTTCTACTTCTCCACCGAA…	CGACGCTGCCGTCGAGAAAGCCTATAAAGGTGAGCGTAAAATCTCCTGGATGGAAATTTACACCGGTGAAAAATCCACACAGGTTTATGGTCAGGACGTCTGGCTGCCTGCTGAAACCCTTGATCTGATTCGTGAATATCGCGTTGCTATCAAAGGCCCGCTGACCACTCCGGTTGGCGGCGGTATTCGTTCTCTTAACGTTGCCCTGCGCCAGGAGCTGGATCTTTACATCTGCCTGCGTCCGGTACGTTACTACCAGGGCACCCCAAGCCCGGTTAAACACCCTGAACTGACCGATATGGTTATCTTCCGTGAAAACTCGGAAGACATTTATGCGGGTATCGAATGGAAAGCTGACTCTGCCGACGCTGAGAAAGTGATTAAATTCCTGCGTGAAGA…	GGTGTAGCGCGTAAACCGGGTATGGATCGTTCCGACCTGTTTAACGTTAACGCCGGTATTGTGAAGAATCTGGTTCAGCAAGTTGCGAAAACTTGCCCGAAAGCGTGCATTGGCATTATCACTAACCCGGTTAACACCACTGTGGCTATCGCTGCGGAAGTGCTGAAAAAAGCCGGTGTTTATGACAAAAACAAGCTGTTTGGCGTTACTACGCTGGATATTATTCGTTCCAACACCTTTGTCGCGGAACTGAAAGGTAAACAACCGGGTGATGTAGAAGTGCCTGTTATTGGCGGTCACTCTGGCGTTACTATTCTGCCGCTGCTGTCACAGGTTCCTGGCGTCAGTTTTACCGAGCAGGAAGTCGCAGATCTGACCAAACGTATCCAGAACGCGGGC…	ATAACGCGCGTGAGAAAGCGCGTGGCGCGAAAGCGATCGGCACCACGGGGCGTGGTATCGGGCCTGCTTATGAAGATAAAGTGGCACGTCGCGGTCTGCGTGTTGGCGACCTTTTCGACAAAGAAACCTTCGCTGAAAAACTGAAAGAAGTGATGGAATATCACAACTTCCAGTTGGTTAACTACTACAAAGTTGAAGCGGTTGATTACCAGAAAGTTCTGGATGATGTGATGGCCGTTGCCGACATCCTGACTTCCATGGTGGTTGACGTTTCTGACCTGCTCGATCAGGCGCGTCAGCGTGGCGATTTCGTCATGTTTGAAGGTGCGCAGGGTACGCTTCTGGATATCGACCACGGTACTTATCCGTACGTAACCTCTTCCAACACCACTGCGGGTG…	TGCTCGTAAACTGGGCGTCGATATTGACAACCTGCTGTGTTCCCAGCCGGACACTGGCGAACAGGCGCTGGAAATCTGTGACGCCCTGGCGCGCTCTGGCGCAGTAGACGTTATCGTTGTTGACTCCGTAGCGGCACTGACGCCGAAAGCGGAAATCGAAGGTGAAATCGGCGACTCTCACATGGGCCTTGCGGCACGTATGATGAGCCAGGCGATGCGTAAGCTGGCGGGTAACCTGAAGCAGTCCAACACGCTGCTGATCTTCATCAACCAGATCCGTATGAAAATTGGTGTGATGTTCGGTAACCCGGAAACCACTACCGGTGGTAACGCGCTGAAATTCTACGCCTCTGTTCGTCTCGACATCCGTCGTATCGGCGCGGTGAAAGAGGGCGAAAA…
3263	GGGGAAAGGGACTCAGGCTCAGTTCATCATGGAGAAATATGGTATTCCGCAAATCTCCACAGGTGATATGCTGCGTGCTGCGGTCAAATCTGGCTCCGAGCTGGGTAAACAAGCAAAAGACATTATGGACGCTGGCAAACTGGTTACCGATGAACTGGTGATCGCGCTGGTTAAAGAACGTATTGCTCAGGAAGACTGCCGTAACGGTTTCCTGCTTGACGGCTTCCCGCGTACTATTCCGCAGGCTGACGCGATGAAAGAAGCGGGCATCAATGTTGATTACGTTCTGGAGTTCGACGTACCGGACGAACTGATTGTTGATCGTATTGTTGGTCGCCGCGTTCACGCGCCATCTGGCCGTGTTTATCACGTTAAATTCAATCCGCCGAAAGTAGAAGG…	CGAGAGCCATTCGCCAGGCGGCGGATGAAGTGCTGGCAGGGCAACATGATGATGAGTTCCCGCTGGCAATCTGGCAAACGGGATCCGGTACGCAAAGCAATATGAATATGAATGAAGTACTGGCTAATCGGGCCAGCGAATTGCTTGGCGGCGTACGCGGAATGGAACGTAAAGTTCACCCTAACGATGACGTGAACAAAAGCCAAAGCTCCAATGATGTCTTCCCAACTGCTATGCACGTAGCGGCGTTATTGGCACTGCGTAAGCAACTCATTCCTCAGCTCAAAAACCTCACTCAAACTCTGAATGAGAAATCGCGTGCATTTGCCGATATCGTCAAAATTGGTCGTACCCACTTGCAGGACGCCACACCGCTGACCCTGGGACAGGAGATTTCTG…	GGTCTGCACGGCGTTGGTGTTTCGGTAGTAAACGCCCTGTCGCAAAAACTGGAGCTGGTTATTCAGCGCGAGGGTAAAATTCACCGTCAGATCTACGAACACGGTGTTCCGCAGGCACCGCTGGCGGTTACTGGTGACACCGACAAAACCGGCACCATGGTGCGTTTCTGGCCAAGCCTTGAAACTTTCACCAATGTGACCGAGTTCGAATACGATATTCTGGCGAAGCGTCTGCGTGAGCTGTCCTTCCTCAACTCCGGCGTGTCTATTCGTCTGAAAGACAAACGCGACGGCAAAGAAGACCACTTCCACTATGAAGGCGGCATTAAGGCGTTCGTTGAATATCTGAACAAGAACAAAACGCCGATTCACCCGAACATCTTCTACTTCTCCACCGAA…	CGATGCTGCCGTCGAGAAAGCCTATAAAGGTGAGCGTAAAATCTCCTGGATGGAAATTTACACCGGTGAAAAATCCACACAGGTTTATGGTCAGGACGTCTGGCTGCCTGCTGAAACCCTTGATCTGATTCGTGAATATCGCGTTGCTATCAAAGGCCCTCTGACCACTCCGGTTGGCGGCGGTATTCGTTCTCTTAACGTTGCCCTGCGTCAGGAGCTGGATCTTTACATCTGCCTGCGTCCGGTACGTTACTACCAGGGCACCCCAAGCCCGGTTAAACACCCTGAACTGACCGATATGGTTATCTTCCGTGAAAACTCGGAAGACATTTATGCGGGTATCGAATGGAAAGCTGACTCTGCCGACGCAGAGAAAGTGATTAAATTCCTGCGTGAAGA…	GGTGTAGCGCGTAAACCGGGTATGGATCGTTCCGACCTGTTTAACGTTAACGCCGGTATTGTGAAGAATCTGGTTCAGCAAGTTGCGAAAACTTGCCCGAAAGCGTGCATTGGCATTATCACTAACCCGGTTAACACCACTGTGGCTATCGCTGCGGAAGTGCTGAAAAAAGCCGGTGTTTATGACAAAAACAAGCTGTTTGGCGTTACTACGCTGGATATTATTCGTTCCAACACCTTTGTCGCGGAACTGAAAGGTAAACAACCGGGTGATGTAGAAGTGCCTGTTATTGGCGGTCACTCTGGCGTTACTATTCTGCCGCTGCTGTCACAGGTTCCTGGCGTCAGTTTTACCGAGCAGGAAGTCGCAGATCTGACCAAACGTATCCAGAACGCGGGC…	ATAACGCGCGTGAGAAAGCGCGCGGCGCGAAAGCGATCGGCACCACGGGGCGTGGTATCGGGCCTGCTTATGAAGATAAAGTGGCACGTCGCGGTCTGCGTGTTGGCGACCTTTTCGACAAAGAAACCTTCGCTGAAAAACTGAAAGAAGTGATGGAATATCACAACTTCCAGTTGGTTAACTACTACAAAGTTGAAGCGGTTGATTACCAGAAAGTTCTGGATGATGTGATGGCCGTTGCCGACATCCTGACTTCCATGGTGGTTGACGTTTCTGACCTGCTTGACCAGGCGCGTCAGCGTGGCGATTTCGTCATGTTTGAAGGTGCGCAGGGTACGCTTCTGGATATCGACCACGGTACTTATCCGTACGTAACCTCTTCCAACACCACTGCGGGCG…	TGCTCGTAAACTGGGCGTCGATATCGACAACCTGCTGTGTTCCCAGCCGGACACTGGCGAACAGGCGCTGGAAATCTGTGACGCCCTGGCGCGCTCTGGCGCAGTAGACGTTATCGTTGTTGACTCCGTAGCGGCACTGACGCCGAAAGCGGAAATCGAAGGTGAAATCGGCGACTCTCACATGGGTCTTGCGGCACGTATGATGAGCCAGGCGATGCGTAAGCTGGCGGGTAACCTGAAGCAGTCCAACACGCTGTTGATCTTCATCAACCAGATCCGTATGAAAATTGGTGTGATGTTCGGTAACCCGGAAACCACTACCGGTGGTAACGCGCTGAAATTCTACGCCTCTGTTCGTCTCGACATCCGTCGTATCGGCGCGGTGAAAGAGGGCGAAAA…
3275	GGGGAAAGGGACTCAGGCTCAGTTCATCATGGAGAAATATGGTATTCCGCAAATCTCCACAGGTGATATGCTGCGTGCCGCAGTCAAATCTGGCTCCGAGCTGGGTAAACAAGCAAAAGACATTATGGACGCTGGCAAACTGGTTACCGATGAACTGGTGATCGCGCTGGTTAAAGAACGTATTGCTCAGGAAGACTGCCGTAACGGTTTCCTGCTTGACGGCTTCCCGCGTACTATTCCGCAGGCTGACGCGATGAAAGAAGCGGGCATCAATGTTGATTACGTTCTGGAGTTCGACGTACCGGACGAACTGATTGTTGATCGTATTGTTGGTCGCCGCGTTCACGCGCCATCTGGCCGTGTTTATCACGTTAAATTCAATCCGCCGAAAGTAGAAGG…	CGAGAGCCATTCGCCAGGCGGCGGATGAAGTGCTGGCAGGGCAACATGATGATGAGTTCCCGCTGGCAATCTGGCAAACGGGATCCGGTACGCAAAGCAATATGAATATGAATGAAGTACTGGCTAATCGGGCCAGCGAATTGCTTGGCGGCGTACGCGGAATGGAACGTAAAGTTCACCCTAACGATGACGTGAACAAAAGCCAAAGCTCCAATGATGTCTTCCCAACTGCTATGCACGTAGCGGCGTTATTGGCACTGCGTAAGCAACTCATTCCTCAGCTCAAAAACCTCACTCAAACTCTGAATGAGAAATCGCGTGCATTTGCCGATATCGTCAAAATTGGTCGTACCCACTTGCAGGACGCCACACCGCTGACCCTGGGACAGGAGATTTCTG…	GGTCTGCACGGCGTTGGTGTTTCGGTAGTAAACGCCCTGTCGCAAAAACTGGAGCTGGTTATTCAGCGCGAGGGTAAAATTCACCGTCAGATCTACGAACACGGTGTTCCGCAAGCACCGCTGGCGGTTACTGGTGACACCGACAAAACCGGCACCATGGTGCGTTTCTGGCCAAGCCTTGAAACTTTCACCAATGTGACCGAGTTCGAATACGATATTCTGGCGAAGCGTCTGCGTGAGCTGTCCTTCCTCAACTCCGGCGTGTCTATTCGTCTGAAAGACAAACGCGACGGCAAAGAAGACCACTTCCACTATGAAGGCGGCATTAAGGCGTTCGTTGAATATCTGAACAAGAACAAAACGCCGATTCACCCGAACATCTTCTACTTCTCCACCGAA…	CGATGCTGCCGTCGAGAAAGCCTATAAAGGTGAGCGTAAAATCTCCTGGATGGAAATTTACACCGGTGAAAAATCCACACAGGTTTATGGTCAGGACGTCTGGCTGCCTGCTGAAACCCTTGATCTGATTCGTGAATATCGCGTTGCTATCAAAGGCCCTCTGACCACTCCGGTTGGCGGCGGTATTCGTTCTCTTAACGTTGCCCTGCGTCAGGAGCTGGATCTTTACATCTGCCTGCGTCCGGTACGTTACTACCAGGGCACCCCAAGCCCGGTTAAACACCCTGAACTGACCGATATGGTTATCTTCCGTGAAAACTCGGAAGACATTTATGCGGGTATCGAATGGAAAGCTGACTCTGCCGACGCTGAGAAAGTGATCAAATTCCTGCGTGAAGA…	GGTGTAGCGCGTAAACCGGGTATGGATCGTTCCGACCTGTTTAACGTTAACGCCGGTATTGTGAAGAATCTGGTTCAGCAAGTTGCGAAAACTTGCCCGAAAGCGTGCATTGGCATTATCACTAACCCGGTTAACACCACTGTGGCTATCGCTGCGGAAGTGCTGAAAAAAGCCGGTGTTTATGACAAAAACAAGCTGTTTGGCGTTACTACGCTGGATATTATTCGTTCCAACACCTTTGTCGCGGAACTGAAAGGTAAACAACCGGGTGATGTAGAAGTGCCTGTTATTGGCGGTCACTCTGGCGTTACTATTCTGCCGCTGCTGTCACAGGTTCCTGGCGTCAGTTTTACCGAGCAGGAAGTCGCAGATCTGACCAAACGTATCCAGAACGCGGGC…	ATAACGCGCGTGAGAAAGCGCGTGGCGCGAAAGCGATCGGCACCACGGGGCGTGGTATCGGGCCTGCTTATGAAGATAAAGTGGCACGTCGCGGTCTGCGTGTTGGCGACCTTTTCGACAAAGAAACCTTCGCTGAAAAACTGAAAGAAGTGATGGAATATCACAACTTCCAGTTGGTTAACTACTACAAAGTTGAAGCGGTTGATTACCAGAAAGTTCTGGATGATGTGATGGCCGTTGCCGACATCCTGACTTCCATGGTGGTTGACGTTTCTGACCTGCTTGACCAGGCGCGTCAGCGTGGCGATTTCGTCATGTTTGAAGGTGCGCAGGGTACGCTTCTGGATATCGACCACGGTACTTATCCGTACGTAACCTCTTCCAACACCACTGCGGGTG…	TGCTCGTAAACTGGGCGTCGATATTGACAACCTGCTGTGTTCCCAGCCGGACACTGGCGAACAGGCGCTGGAAATCTGTGACGCCCTGGCGCGCTCTGGCGCAGTAGACGTTATCGTTGTTGACTCCGTAGCGGCACTGACGCCGAAAGCGGAAATCGAAGGTGAAATCGGCGACTCTCACATGGGCCTTGCGGCACGTATGATGAGCCAGGCGATGCGTAAGCTGGCGGGTAACCTGAAGCAGTCCAACACGCTGCTGATCTTCATCAACCAGATCCGTATGAAAATTGGTGTGATGTTCGGTAACCCGGAAACCACTACCGGTGGTAACGCGCTGAAATTCTACGCCTCTGTTCGTCTCGACATCCGTCGTATCGGCGCGGTGAAAGAGGGCGAAAA…
3278	GGGGAAAGGGACTCAGGCTCAGTTCATCATGGAGAAATATGGTATTCCGCAAATCTCCACAGGTGATATGCTGCGTGCCGCAGTCAAATCTGGCTCCGAGCTGGGTAAACAAGCAAAAGACATTATGGACGCTGGCAAACTGGTTACCGATGAACTGGTGATCGCGCTGGTTAAAGAACGTATTGCTCAGGAAGACTGCCGTAACGGTTTCCTGCTTGACGGCTTCCCGCGTACTATTCCGCAGGCTGACGCGATGAAAGAAGCGGGCATCAATGTTGATTACGTTCTGGAGTTCGACGTACCGGACGAACTGATTGTTGATCGTATTGTTGGTCGTCGCGTTCACGCGCCATCTGGCCGTGTTTATCACGTTAAATTCAATCCGCCGAAAGTAGAAGG…	CGAGAGCCATTCGCCAGGCGGCGGATGAAGTGCTGGCAGGGCAACATGATGATGAGTTCCCGCTGGCAATCTGGCAAACGGGATCTGGTACGCAAAGCAATATGAATATGAATGAAGTACTGGCTAACCGGGCCAGCGAATTGCTTGGCGGCGTACGCGGAATGGAACGTAAAGTTCACCCTAACGATGACGTGAACAAAAGCCAAAGCTCCAATGATGTCTTCCCAACTGCTATGCACGTGGCGGCGTTATTGGCACTGCGTAAGCAACTCATTCCTCAGCTCAAAAACCTCACTCAAACTCTGAATGAGAAATCGCGCGCATTTGCCGATATCGTCAAAATTGGTCGTACCCACTTGCAGGACGCCACACCGCTGACCCTGGGACAGGAGATTTCTG…	GGTCTGCACGGCGTTGGTGTTTCGGTAGTAAACGCCCTGTCGCAAAAACTGGAGCTGGTTATTCAGCGCGAGGGTAAAATTCACCGTCAGATCTACGAACACGGTGTTCCGCAGGCACCGCTGGCGGTTACTGGTGACACCGACAAAACCGGCACCATGGTGCGTTTCTGGCCAAGCCTTGAAACTTTCACCAATGTGACCGAGTTCGAATACGATATTCTGGCGAAGCGTCTGCGTGAGCTGTCCTTCCTCAATTCCGGCGTGTCTATTCGTCTGAAAGACAAACGCGACGGCAAAGAAGACCACTTCCACTATGAAGGCGGCATTAAGGCGTTCGTTGAATATCTGAACAAGAACAAAACGCCGATTCACCCGAACATCTTCTACTTCTCCACCGAA…	CGATGCTGCCGTCGAGAAAGCCTATAAAGGTGAGCGTAAAATCTCCTGGATGGAAATTTACACCGGTGAAAAATCCACACAGGTTTATGGTCAGGACGTCTGGCTGCCTGCTGAAACCCTTGATCTGATTCGTGAATATCGCGTTGCTATCAAAGGCCCTCTGACCACTCCGGTTGGCGGCGGTATTCGTTCTCTTAACGTTGCCCTGCGTCAGGAGCTGGATCTTTACATCTGCCTGCGTCCGGTACGTTACTACCAGGGCACCCCAAGCCCGGTTAAACACCCTGAACTGACCGATATGGTTATCTTCCGTGAAAACTCGGAAGACATTTATGCGGGTATCGAATGGAAAGCTGACTCTGCCGACGCTGAGAAAGTGATCAAATTCCTGCGTGAAGA…	GGTGTAGCGCGTAAACCGGGTATGGATCGTTCCGACCTGTTTAACGTTAACGCCGGTATTGTGAAGAATCTGGTTCAGCAAGTTGCGAAAACTTGCCCGAAAGCGTGCATTGGCATTATCACTAACCCGGTTAACACCACTGTGGCTATCGCTGCGGAAGTGCTGAAAAAAGCCGGTGTTTATGACAAAAACAAGCTGTTTGGCGTTACTACGCTGGATATTATTCGTTCCAACACCTTTGTCGCGGAACTGAAAGGTAAACAACCGGGTGATGTAGAAGTGCCTGTTATTGGCGGTCACTCTGGCGTTACTATTCTGCCGCTGCTGTCACAGGTTCCTGGCGTCAGTTTTACCGAGCAGGAAGTCGCAGATCTGACCAAACGTATCCAGAACGCGGGC…	ATAACGCGCGTGAGAAAGCGCGTGGCGCGAAAGCGATCGGCACCACGGGGCGTGGTATCGGGCCTGCTTATGAAGATAAAGTAGCACGCCGCGGTCTGCGTGTTGGCGACCTTTTCGACAAAGAAACCTTCGCTGAAAAACTGAAAGAAGTGATGGAATATCACAACTTCCAGTTGGTTAACTACTACAAAGTTGAAGCGGTTGATTACCAGAAAGTTCTGGATGATGTGATGGCCGTTGCCGACATCCTGACTTCCATGGTGGTTGACGTTTCTGACCTGCTTGACCAGGCGCGTCAGCGTGGCGATTTCGTCATGTTTGAAGGTGCGCAGGGTACGCTTCTGGATATCGACCACGGTACTTATCCGTACGTAACCTCTTCCAACACCACTGCGGGTG…	TGCTCGTAAACTGGGCGTCGATATTGACAACCTGCTGTGTTCCCAGCCGGACACTGGCGAACAGGCGCTGGAAATCTGTGACGCCCTGGCGCGCTCTGGCGCAGTAGACGTTATCGTTGTTGACTCCGTAGCGGCACTGACGCCGAAAGCGGAAATCGAAGGTGAAATCGGCGACTCTCACATGGGCCTTGCGGCACGTATGATGAGCCAGGCGATGCGTAAGCTGGCGGGTAACCTGAAGCAGTCCAACACGCTGCTGATCTTCATCAACCAGATCCGTATGAAAATTGGTGTGATGTTCGGTAACCCGGAAACCACTACCGGTGGTAACGCGCTGAAATTCTACGCCTCTGTTCGTCTCGACATCCGTCGTATCGGCGCGGTGAAAGAGGGCGAAAA…
3280	GGGGAAAGGGACTCAGGCTCAGTTCATCATGGAGAAATATGGTATTCCGCAAATCTCCACAGGTGATATGCTGCGTGCTGCGGTCAAATCTGGCTCCGAGCTGGGTAAACAAGCAAAAGACATTATGGACGCTGGCAAACTGGTTACCGATGAACTGGTGATCGCGCTGGTTAAAGAACGTATTGCTCAGGAAGACTGCCGTAACGGTTTCCTGCTTGACGGCTTCCCGCGTACTATTCCGCAGGCTGACGCGATGAAAGAAGCGGGCATCAATGTTGATTACGTTCTGGAGTTCGACGTACCGGACGAACTGATTGTTGATCGTATTGTTGGTCGCCGCGTTCACGCGCCATCTGGCCGTGTTTATCACGTTAAATTCAATCCGCCGAAAGTAGAAGG…	CGAGAGCTATTCGCCAGGCGGCGGATGAAGTGCTGGCAGGGCAACATGATGATGAGTTCCCGCTGGCAATCTGGCAAACGGGATCTGGTACGCAAAGCAATATGAATATGAATGAAGTACTGGCTAACCGGGCCAGCGAATTGCTTGGCGGCGTACGCGGAATGGAACGTAAAGTTCACCCTAACGATGACGTGAACAAAAGCCAAAGCTCCAATGATGTCTTCCCAACTGCTATGCACGTGGCGGCGTTATTGGCACTGCGTAAGCAACTCATTCCTCAGCTCAAAAACCTCACTCAAACTCTGAATGAGAAATCGCGCGCATTTGCCGATATCGTCAAAATTGGTCGTACCCACTTGCAGGACGCCACACCGCTGACTCTGGGACAGGAGATTTCTG…	GGTCTGCACGGCGTTGGTGTTTCGGTAGTAAACGCCCTGTCGCAAAAACTGGAGCTGGTTATTCAGCGCGAGGGTAAAATTCACCGTCAGATCTACGAACACGGTGTTCCGCAGGCACCGCTGGCGGTTACTGGTGACACCGACAAAACCGGCACCATGGTGCGTTTCTGGCCAAGCCTTGAAACTTTCACCAATGTGACCGAGTTCGAATACGATATTCTGGCGAAGCGTCTGCGTGAGCTGTCCTTCCTCAACTCCGGCGTGTCTATTCGTCTGAAAGACAAACGCGACGGCAAAGAAGACCACTTCCACTATGAAGGTGGCATTAAGGCGTTCGTTGAATATCTGAACAAGAACAAAACGCCGATTCACCCGAACATCTTCTACTTCTCCACCGAA…	CGACGCTGCCGTCGAGAAAGCCTATAAAGGCGAGCGTAAAATCTCCTGGATGGAAATTTACACCGGTGAAAAATCCACACAGGTTTATGGTCAGGACGTCTGGTTGCCTGCTGAAACCCTTGATCTGATTCGTGAATATCGCGTTGCTATCAAAGGCCCTCTGACCACTCCGGTTGGCGGCGGTATTCGTTCTCTTAACGTTGCCCTGCGCCAGGAGCTGGATCTTTACATCTGCCTGCGTCCGGTACGTTACTACCAGGGCACCCCAAGCCCGGTTAAACACCCTGAACTGACCGATATGGTTATCTTCCGTGAAAACTCGGAAGACATTTATGCGGGTATCGAATGGAAAGCTGACTCTGCCGACGCTGAGAAAGTGATCAAATTCCTGCGTGAAGA…	GGTGTAGCGCGTAAACCGGGTATGGATCGTTCCGACCTGTTTAACGTTAACGCCGGTATTGTGAAGAATCTGGTTCAGCAAGTTGCGAAAACTTGCCCGAAAGCGTGCATTGGCATTATCACTAACCCGGTTAACACCACTGTGGCTATCGCTGCGGAAGTGCTGAAAAAAGCCGGTGTTTATGACAAAAACAAGCTGTTTGGCGTTACTACGCTGGATATTATTCGTTCCAACACCTTTGTCGCGGAACTGAAAGGTAAACAACCGGGTGATGTAGAAGTGCCGGTTATTGGCGGTCACTCTGGCGTTACTATTCTGCCGCTGCTGTCACAGGTTCCTGGCGTCAGTTTTACCGAGCAGGAAGTCGCAGATCTGACCAAACGTATCCAGAACGCGGGT…	ATAACGCGCGTGAGAAAGCGCGTGGCGCGAAAGCGATCGGCACCACGGGGCGTGGTATCGGGCCTGCTTATGAAGATAAAGTGGCACGTCGCGGTCTGCGTGTTGGCGACCTTTTCGACAAAGAAACCTTCGCTGAAAAACTGAAAGAAGTGATGGAATATCACAACTTCCAGTTGGTTAACTACTACAAAGTTGAAGCGGTTGATTACCAGAAAGTTCTGGATGATGTGATGGCCGTTGCCGACATCCTGACTTCCATGGTGGTTGACGTTTCTGACCTGCTCGATCAGGCGCGTCAGCGTGGCGATTTCGTCATGTTTGAAGGTGCGCAGGGTACGCTTCTGGATATCGACCACGGTACTTATCCGTACGTAACCTCTTCCAACACCACTGCGGGTG…	TGCACGTAAACTGGGCGTCGATATCGACAACCTGCTGTGCTCCCAGCCGGATACCGGCGAGCAGGCACTGGAAATCTGTGACGCCCTGGCACGTTCTGGCGCAGTAGACGTTATCGTCGTTGACTCCGTGGCGGCCCTGACGCCGAAAGCGGAAATCGAAGGCGAAATCGGCGACTCTCACATGGGCCTTGCGGCACGTATGATGAGCCAGGCGATGCGTAAGCTGGCGGGTAACCTGAAGCAGTCCAACACGCTGCTGATCTTCATCAACCAGATCCGTATGAAAATTGGTGTGATGTTCGGTAACCCGGAAACCACTACCGGTGGTAACGCGCTGAAATTCTACGCCTCTGTTCGTCTCGACATCCGTCGTATCGGCGCGGTGAAAGAGGGCGAAAA…
3281	GGGGAAAGGGACTCAGGCTCAGTTCATCATGGAGAAATATGGTATTCCGCAAATCTCCACAGGTGATATGCTGCGTGCCGCAGTCAAATCTGGCTCCGAGCTGGGTAAACAAGCAAAAGACATTATGGACGCTGGCAAACTGGTTACCGATGAACTGGTGATCGCGCTGGTTAAAGAACGTATTGCTCAGGAAGACTGCCGTAACGGTTTCCTGCTTGACGGCTTCCCGCGTACTATTCCGCAGGCTGACGCGATGAAAGAAGCGGGCATCAATGTTGATTACGTTCTGGAGTTCGACGTACCGGACGAACTGATTGTTGATCGTATTGTTGGTCGTCGCGTTCACGCGCCATCTGGCCGTGTTTATCACGTTAAATTCAATCCGCCGAAAGTAGAAGG…	CGAGAGCCATTCGCCAGGCGGCGGATGAAGTGCTGGCAGGGCAACATGATGATGAGTTCCCGCTGGCAATCTGGCAAACGGGATCTGGTACGCAAAGCAATATGAATATGAATGAAGTACTGGCTAACCGGGCCAGCGAATTGCTTGGCGGCGTACGCGGAATGGAACGTAAAGTTCACCCTAACGATGACGTGAACAAAAGCCAAAGCTCCAATGATGTCTTCCCAACTGCTATGCACGTGGCGGCGTTATTGGCACTGCGTAAGCAACTCATTCCTCAGCTCAAAAACCTCACTCAAACTCTGAATGAGAAATCGCGCGCATTTGCCGATATCGTCAAAATTGGTCGTACCCACTTGCAGGACGCCACACCGCTGACCCTGGGACAGGAGATTTCTG…	GGTCTGCACGGCGTTGGTGTTTCGGTAGTAAACGCCCTGTCGCAAAAACTGGAGCTGGTTATTCAGCGCGAGGGTAAAATTCACCGTCAGATCTACGAACACGGTGTTCCGCAGGCACCGCTGGCGGTTACTGGTGACACCGACAAAACCGGCACCATGGTGCGTTTCTGGCCAAGCCTTGAAACTTTCACCAATGTGACCGAGTTCGAATACGATATTCTGGCGAAGCGTCTGCGTGAGCTGTCCTTCCTCAATTCCGGCGTGTCTATTCGTCTGAAAGACAAACGCGACGGCAAAGAAGACCACTTCCACTATGAAGGCGGCATTAAGGCGTTCGTTGAATATCTGAACAAGAACAAAACGCCGATTCACCCGAACATCTTCTACTTCTCCACCGAA…	CGATGCTGCCGTCGAGAAAGCCTATAAAGGTGAGCGTAAAATCTCCTGGATGGAAATTTACACCGGTGAAAAATCCACACAGGTTTATGGTCAGGACGTCTGGCTGCCTGCTGAAACCCTTGATCTGATTCGTGAATATCGCGTTGCTATCAAAGGCCCTCTGACCACTCCGGTTGGCGGCGGTATTCGTTCTCTTAACGTTGCCCTGCGTCAGGAGCTGGATCTTTACATCTGCCTGCGTCCGGTACGTTACTACCAGGGCACCCCAAGCCCGGTTAAACACCCTGAACTGACCGATATGGTTATCTTCCGTGAAAACTCGGAAGACATTTATGCGGGTATCGAATGGAAAGCTGACTCTGCCGACGCTGAGAAAGTGATCAAATTCCTGCGTGAAGA…	GGTGTAGCGCGTAAACCGGGTATGGATCGTTCCGACCTGTTTAACGTTAACGCCGGTATTGTGAAGAATCTGGTTCAGCAAGTTGCGAAAACTTGCCCGAAAGCGTGCATTGGCATTATCACTAACCCGGTTAACACCACTGTGGCTATCGCTGCGGAAGTGCTGAAAAAAGCCGGTGTTTATGACAAAAACAAGCTGTTTGGCGTTACTACGCTGGATATTATTCGTTCCAACACCTTTGTCGCGGAACTGAAAGGTAAACAACCGGGTGATGTAGAAGTGCCTGTTATTGGCGGTCACTCTGGCGTTACTATTCTGCCGCTGCTGTCACAGGTTCCTGGCGTCAGTTTTACCGAGCAGGAAGTCGCAGATCTGACCAAACGTATCCAGAACGCGGGC…	ATAACGCGCGTGAGAAAGCGCGTGGCGCGAAAGCGATCGGCACCACGGGGCGTGGTATCGGGCCTGCTTATGAAGATAAAGTAGCACGCCGCGGTCTGCGTGTTGGCGACCTTTTCGACAAAGAAACCTTCGCTGAAAAACTGAAAGAAGTGATGGAATATCACAACTTCCAGTTGGTTAACTACTACAAAGTTGAAGCGGTTGATTACCAGAAAGTTCTGGATGATGTGATGGCCGTTGCCGACATCCTGACTTCCATGGTGGTTGACGTTTCTGACCTGCTTGACCAGGCGCGTCAGCGTGGCGATTTCGTCATGTTTGAAGGTGCGCAGGGTACGCTTCTGGATATCGACCACGGTACTTATCCGTACGTAACCTCTTCCAACACCACTGCGGGTG…	TGCTCGTAAACTGGGCGTCGATATTGACAACCTGCTGTGTTCCCAGCCGGACACTGGCGAACAGGCGCTGGAAATCTGTGACGCCCTGGCGCGCTCTGGCGCAGTAGACGTTATCGTTGTTGACTCCGTAGCGGCACTGACGCCGAAAGCGGAAATCGAAGGTGAAATCGGCGACTCTCACATGGGCCTTGCGGCACGTATGATGAGCCAGGCGATGCGTAAGCTGGCGGGTAACCTGAAGCAGTCCAACACGCTGCTGATCTTCATCAACCAGATCCGTATGAAAATTGGTGTGATGTTCGGTAACCCGGAAACCACTACCGGTGGTAACGCGCTGAAATTCTACGCCTCTGTTCGTCTCGACATCCGTCGTATCGGCGCGGTGAAAGAGGGCGAAAA…
3282	GGGGAAAGGGACTCAGGCTCAGTTCATCATGGAGAAATATGGTATTCCGCAAATCTCCACAGGTGATATGCTGCGTGCCGCAGTCAAATCTGGCTCCGAGCTGGGTAAACAAGCAAAAGACATTATGGACGCTGGCAAACTGGTTACCGATGAACTGGTGATCGCGCTGGTTAAAGAACGTATTGCTCAGGAAGACTGCCGTAACGGTTTCCTGCTTGACGGCTTCCCGCGTACTATTCCGCAGGCTGACGCGATGAAAGAAGCGGGCATCAATGTTGATTACGTTCTGGAGTTCGACGTACCGGACGAACTGATTGTTGATCGTATTGTTGGTCGCCGCGTTCACGCGCCATCTGGCCGTGTTTATCACGTTAAATTCAATCCGCCGAAAGTAGAAGG…	CGAGAGCCATTCGCCAGGCGGCGGATGAAGTGCTGGCAGGGCAACATGATGATGAGTTCCCGCTGGCAATCTGGCAAACGGGATCTGGTACGCAAAGCAATATGAATATGAATGAAGTACTGGCTAACCGGGCCAGCGAATTGCTTGGCGGCGTACGCGGAATGGAACGTAAAGTTCACCCCAACGATGACGTGAACAAAAGCCAAAGCTCCAATGATGTCTTCCCAACTGCTATGCACGTGGCGGCGTTATTGGCACTGCGTAAGCAACTCATTCCTCAGCTCAAAAACCTCACTCAAACTCTGAATGAGAAATCGCGTGCATTTGCCGATATCGTCAAAATTGGTCGTACCCACTTGCAGGACGCCACACCGCTGACCCTGGGACAGGAGATTTCTG…	GGTCTGCACGGCGTTGGTGTTTCGGTAGTAAACGCCCTGTCGCAAAAACTGGAGCTGGTTATTCAGCGCGAGGGTAAAATTCACCGTCAGATCTACGAACACGGTGTTCCGCAGGCACCGCTGGCGGTTACTGGTGACACCGACAAAACCGGCACCATGGTGCGTTTCTGGCCAAGCCTTGAAACTTTCACCAATGTGACCGAGTTCGAATACGATATTCTGGCGAAGCGTCTGCGTGAGCTGTCCTTCCTCAATTCCGGCGTGTCTATTCGTCTGAAAGACAAACGCGACGGCAAAGAAGACCACTTCCACTATGAAGGCGGCATTAAGGCGTTCGTTGAATATCTGAACAAGAACAAAACGCCGATTCACCCGAACATCTTCTACTTCTCCACCGAA…	CGACGCTGCCGTCGAGAAAGCCTATAAAGGCGAGCGTAAAATCTCCTGGATGGAAATTTACACCGGTGAAAAATCCACACAGGTTTATGGTCAGGACGTCTGGCTGCCTGCTGAAACCCTTGATCTGATTCGTGAATATCGCGTTGCTATCAAAGGCCCGCTGACCACTCCGGTTGGCGGCGGTATTCGTTCTCTTAACGTTGCCCTGCGTCAGGAGCTGGATCTTTACATCTGCCTGCGTCCGGTACGTTACTATCAGGGCACTCCAAGCCCGGTTAAACACCCTGAACTGACCGATATGGTTATCTTCCGTGAAAACTCGGAAGACATTTATGCGGGTATCGAATGGAAAGCTGACTCTGCCGACGCAGAGAAAGTGATTAAATTCCTGCGTGAAGA…	GGTGTAGCGCGTAAACCGGGTATGGATCGTTCCGACCTGTTTAACGTTAACGCCGGTATTGTGAAGAATCTGGTTCAGCAAGTTGCGAAAACTTGCCCGAAAGCGTGCATTGGCATTATCACTAACCCGGTTAACACCACTGTGGCTATCGCTGCGGAAGTGCTGAAAAAAGCCGGTGTTTATGACAAAAACAAGCTGTTTGGCGTTACTACGCTGGATATTATTCGTTCCAACACCTTTGTCGCGGAACTGAAAGGTAAACAACCGGGTGATGTAGAAGTGCCTGTTATTGGCGGTCACTCTGGCGTTACTATTCTGCCGCTGCTGTCACAGGTTCCTGGCGTCAGTTTTACCGAGCAGGAAGTCGCAGATCTGACCAAACGTATCCAGAACGCGGGC…	ATAACGCGCGTGAGAAAGCGCGTGGCGCGAAAGCGATCGGCACCACGGGGCGTGGTATCGGGCCTGCTTATGAAGATAAAGTGGCACGTCGCGGTCTGCGTGTTGGCGACCTTTTCGACAAAGAAACCTTCGCTGAAAAACTGAAAGAAGTGATGGAATATCACAACTTCCAGTTGGTTAACTACTACAAAGTTGAAGCGGTTGATTACCAGAAAGTTCTGGATGATGTGATGGCCGTTGCCGACATCCTGACTTCCATGGTGGTTGACGTTTCTGACCTGCTCGATCAGGCGCGTCAGCGTGGCGATTTCGTCATGTTTGAAGGTGCGCAGGGTACGCTTCTGGATATCGACCACGGTACTTATCCGTACGTAACCTCTTCCAACACCACTGCGGGTG…	TGCTCGTAAACTGGGCGTCGATATCGACAACCTGCTGTGTTCCCAGCCGGACACTGGCGAACAGGCGCTGGAAATCTGTGACGCCCTGGCGCGCTCTGGCGCAGTAGACGTTATCGTTGTTGACTCCGTAGCGGCACTGACGCCGAAAGCGGAAATCGAAGGTGAAATCGGCGACTCTCACATGGGCCTTGCGGCACGTATGATGAGCCAGGCGATGCGTAAGCTGGCGGGTAACCTGAAGCAGTCCAACACGCTGCTGATCTTCATCAACCAGATCCGTATGAAAATTGGTGTGATGTTCGGTAACCCGGAAACCACTACCGGTGGTAACGCGCTGAAATTCTACGCCTCTGTTCGTCTCGACATCCGTCGTATCGGCGCGGTGAAAGAGGGCGAAAA…
3283	GGGGAAAGGGACTCAGGCTCAGTTCATCATGGAGAAATATGGTATTCCGCAAATCTCCACAGGTGATATGCTGCGTGCCGCAGTCAAATCTGGCTCCGAGCTGGGTAAACAAGCAAAAGACATTATGGACGCTGGCAAACTGGTTACCGATGAACTGGTGATCGCGCTGGTTAAAGAACGTATTGCTCAGGAAGACTGCCGTAACGGTTTCCTGCTTGACGGCTTCCCGCGTACTATTCCGCAGGCTGACGCGATGAAAGAAGCGGGCATCAATGTTGATTACGTTCTGGAGTTCGACGTACCGGACGAACTGATTGTTGATCGTATTGTTGGTCGTCGCGTTCACGCGCCATCTGGCCGTGTTTATCACGTTAAATTCAATCCGCCGAAAGTAGAAGG…	CGAGAGCCATTCGCCAGGCGGCGGATGAAGTGCTGGCAGGGCAACATGATGATGAGTTCCCGCTGGCAATCTGGCAAACGGGATCTGGTACGCAAAGCAATATGAATATGAATGAAGTACTGGCTAACCGGGCCAGCGAATTGCTTGGCGGCGTACGCGGAATGGAACGTAAAGTTCACCCTAACGATGACGTGAACAAAAGCCAAAGCTCCAATGATGTCTTCCCAACTGCTATGCACGTGGCGGCGTTATTGGCACTGCGTAAGCAACTCATTCCTCAGCTCAAAAACCTCACTCAAACTCTGAATGAGAAATCGCGCGCATTTGCCGATATCGTCAAAATTGGTCGTACCCACTTGCAGGACGCCACACCGCTGACCCTGGGACAGGAGATTTCTG…	GGTCTGCACGGCGTTGGTGTTTCGGTAGTAAACGCCCTGTCGCAAAAACTGGAGCTGGTTATTCAGCGCGAGGGTAAAATTCACCGTCAGATCTACGAACACGGTGTTCCGCAGGCACCGCTGGCGGTTACTGGTGACACCGACAAAACCGGCACCATGGTGCGTTTCTGGCCAAGCCTTGAAACTTTCACCAATGTGACCGAGTTCGAATACGATATTCTGGCGAAGCGTCTGCGTGAGCTGTCCTTCCTCAATTCCGGCGTGTCTATTCGTCTGAAAGACAAACGCGACGGCAAAGAAGACCACTTCCACTATGAAGGCGGCATTAAGGCGTTCGTTGAATATCTGAACAAGAACAAAACGCCGATTCACCCGAACATCTTCTACTTCTCCACCGAA…	CGATGCTGCCGTCGAGAAAGCCTATAAAGGTGAGCGTAAAATCTCCTGGATGGAAATTTACACCGGTGAAAAATCCACACAGGTTTATGGTCAGGACGTCTGGCTGCCTGCTGAAACCCTTGATCTGATTCGTGAATATCGCGTTGCTATCAAAGGCCCTCTGACCACTCCGGTTGGCGGCGGTATTCGTTCTCTTAACGTTGCCCTGCGTCAGGAGCTGGATCTTTACATCTGCCTGCGTCCGGTACGTTACTACCAGGGCACCCCAAGCCCGGTTAAACACCCTGAACTGACCGATATGGTTATCTTCCGTGAAAACTCGGAAGACATTTATGCGGGTATCGAATGGAAAGCTGACTCTGCCGACGCTGAGAAAGTGATCAAATTCCTGCGTGAAGA…	GGTGTAGCGCGTAAACCGGGTATGGATCGTTCCGACCTGTTTAACGTTAACGCCGGTATTGTGAAGAATCTGGTTCAGCAAGTTGCGAAAACTTGCCCGAAAGCGTGCATTGGCATTATCACTAACCCGGTTAACACCACTGTGGCTATCGCTGCGGAAGTGCTGAAAAAAGCCGGTGTTTATGACAAAAACAAGCTGTTTGGCGTTACTACGCTGGATATTATTCGTTCCAACACCTTTGTCGCGGAACTGAAAGGTAAACAACCGGGTGATGTAGAAGTGCCTGTTATTGGCGGTCACTCTGGCGTTACTATTCTGCCGCTGCTGTCACAGGTTCCTGGCGTCAGTTTTACCGAGCAGGAAGTCGCAGATCTGACCAAACGTATCCAGAACGCGGGC…	ATAACGCGCGTGAGAAAGCGCGTGGCGCGAAAGCGATCGGCACCACGGGGCGTGGTATCGGGCCTGCTTATGAAGATAAAGTAGCACGCCGCGGTCTGCGTGTTGGCGACCTTTTCGACAAAGAAACCTTCGCTGAAAAACTGAAAGAAGTGATGGAATATCACAACTTCCAGTTGGTTAACTACTACAAAGTTGAAGCGGTTGATTACCAGAAAGTTCTGGATGATGTGATGGCCGTTGCCGACATCCTGACTTCCATGGTGGTTGACGTTTCTGACCTGCTTGACCAGGCGCGTCAGCGTGGCGATTTCGTCATGTTTGAAGGTGCGCAGGGTACGCTTCTGGATATCGACCACGGTACTTATCCGTACGTAACCTCTTCCAACACCACTGCGGGTG…	TGCTCGTAAACTGGGCGTCGATATTGACAACCTGCTGTGTTCCCAGCCGGACACTGGCGAACAGGCGCTGGAAATCTGTGACGCCCTGGCGCGCTCTGGCGCAGTAGACGTTATCGTTGTTGACTCCGTAGCGGCACTGACGCCGAAAGCGGAAATCGAAGGTGAAATCGGCGACTCTCACATGGGCCTTGCGGCACGTATGATGAGCCAGGCGATGCGTAAGCTGGCGGGTAACCTGAAGCAGTCCAACACGCTGCTGATCTTCATCAACCAGATCCGTATGAAAATTGGTGTGATGTTCGGTAACCCGGAAACCACTACCGGTGGTAACGCGCTGAAATTCTACGCCTCTGTTCGTCTCGACATCCGTCGTATCGGCGCGGTGAAAGAGGGCGAAAA…
3284	GGGGAAAGGGACTCAGGCTCAGTTCATCATGGAGAAATATGGTATTCCGCAAATCTCCACAGGTGATATGCTGCGTGCCGCAGTCAAATCTGGCTCCGAGCTGGGTAAACAAGCAAAAGACATTATGGACGCTGGCAAACTGGTTACCGATGAACTGGTGATCGCGCTGGTTAAAGAACGTATTGCTCAGGAAGACTGCCGTAACGGTTTCCTGCTTGACGGCTTCCCGCGTACTATTCCGCAGGCTGACGCGATGAAAGAAGCGGGCATCAATGTTGATTACGTTCTGGAGTTCGACGTACCGGACGAACTGATTGTTGATCGTATTGTTGGTCGTCGCGTTCACGCGCCATCTGGCCGTGTTTATCACGTTAAATTCAATCCGCCGAAAGTAGAAGG…	CGAGAGCCATTCGCCAGGCGGCGGATGAAGTGCTGGCAGGGCAACATGATGATGAGTTCCCGCTGGCAATCTGGCAAACGGGATCTGGTACGCAAAGCAATATGAATATGAATGAAGTACTGGCTAACCGGGCCAGCGAATTGCTTGGCGGCGTACGCGGAATGGAACGTAAAGTTCACCCTAACGATGACGTGAACAAAAGCCAAAGCTCCAATGATGTCTTCCCAACTGCTATGCACGTGGCGGCGTTATTGGCACTGCGTAAGCAACTCATTCCTCAGCTCAAAAACCTCACTCAAACTCTGAATGAGAAATCGCGCGCATTTGCCGATATCGTCAAAATTGGTCGTACCCACTTGCAGGACGCCACACCGCTGACCCTGGGACAGGAGATTTCTG…	GGTCTGCACGGCGTTGGTGTTTCGGTAGTAAACGCCCTGTCGCAAAAACTGGAGCTGGTTATTCAGCGCGAGGGTAAAATTCACCGTCAGATCTACGAACACGGTGTTCCGCAGGCACCGCTGGCGGTTACTGGTGACACCGACAAAACCGGCACCATGGTGCGTTTCTGGCCAAGCCTTGAAACTTTCACCAATGTGACCGAGTTCGAATACGATATTCTGGCGAAGCGTCTGCGTGAGCTGTCCTTCCTCAATTCCGGCGTGTCTATTCGTCTGAAAGACAAACGCGACGGCAAAGAAGACCACTTCCACTATGAAGGCGGCATTAAGGCGTTCGTTGAATATCTGAACAAGAACAAAACGCCGATTCACCCGAACATCTTCTACTTCTCCACCGAA…	CGATGCTGCCGTCGAGAAAGCCTATAAAGGTGAGCGTAAAATCTCCTGGATGGAAATTTACACCGGTGAAAAATCCACACAGGTTTATGGTCAGGACGTCTGGCTGCCTGCTGAAACCCTTGATCTGATTCGTGAATATCGCGTTGCTATCAAAGGCCCTCTGACCACTCCGGTTGGCGGCGGTATTCGTTCTCTTAACGTTGCCCTGCGTCAGGAGCTGGATCTTTACATCTGCCTGCGTCCGGTACGTTACTACCAGGGCACCCCAAGCCCGGTTAAACACCCTGAACTGACCGATATGGTTATCTTCCGTGAAAACTCGGAAGACATTTATGCGGGTATCGAATGGAAAGCTGACTCTGCCGACGCTGAGAAAGTGATCAAATTCCTGCGTGAAGA…	GGTGTAGCGCGTAAACCGGGTATGGATCGTTCCGACCTGTTTAACGTTAACGCCGGTATTGTGAAGAATCTGGTTCAGCAAGTTGCGAAAACTTGCCCGAAAGCGTGCATTGGCATTATCACTAACCCGGTTAACACCACTGTGGCTATCGCTGCGGAAGTGCTGAAAAAAGCCGGTGTTTATGACAAAAACAAGCTGTTTGGCGTTACTACGCTGGATATTATTCGTTCCAACACCTTTGTCGCGGAACTGAAAGGTAAACAACCGGGTGATGTAGAAGTGCCTGTTATTGGCGGTCACTCTGGCGTTACTATTCTGCCGCTGCTGTCACAGGTTCCTGGCGTCAGTTTTACCGAGCAGGAAGTCGCAGATCTGACCAAACGTATCCAGAACGCGGGC…	ATAACGCGCGTGAGAAAGCGCGTGGCGCGAAAGCGATCGGCACCACGGGGCGTGGTATCGGGCCTGCTTATGAAGATAAAGTAGCACGCCGCGGTCTGCGTGTTGGCGACCTTTTCGACAAAGAAACCTTCGCTGAAAAACTGAAAGAAGTGATGGAATATCACAACTTCCAGTTGGTTAACTACTACAAAGTTGAAGCGGTTGATTACCAGAAAGTTCTGGATGATGTGATGGCCGTTGCCGACATCCTGACTTCCATGGTGGTTGACGTTTCTGACCTGCTTGACCAGGCGCGTCAGCGTGGCGATTTCGTCATGTTTGAAGGTGCGCAGGGTACGCTTCTGGATATCGACCACGGTACTTATCCGTACGTAACCTCTTCCAACACCACTGCGGGTG…	TGCTCGTAAACTGGGCGTCGATATTGACAACCTGCTGTGTTCCCAGCCGGACACTGGCGAACAGGCGCTGGAAATCTGTGACGCCCTGGCGCGCTCTGGCGCAGTAGACGTTATCGTTGTTGACTCCGTAGCGGCACTGACGCCGAAAGCGGAAATCGAAGGTGAAATCGGCGACTCTCACATGGGCCTTGCGGCACGTATGATGAGCCAGGCGATGCGTAAGCTGGCGGGTAACCTGAAGCAGTCCAACACGCTGCTGATCTTCATCAACCAGATCCGTATGAAAATTGGTGTGATGTTCGGTAACCCGGAAACCACTACCGGTGGTAACGCGCTGAAATTCTACGCCTCTGTTCGTCTCGACATCCGTCGTATCGGCGCGGTGAAAGAGGGCGAAAA…
3289	GGGGAAAGGGACTCAGGCTCAGTTCATCATGGAGAAATATGGTATTCCGCAAATCTCCACAGGTGATATGCTGCGTGCCGCAGTCAAATCTGGCTCCGAGCTGGGTAAACAAGCAAAAGACATTATGGACGCTGGCAAACTGGTTACCGATGAACTGGTGATCGCGCTGGTTAAAGAACGTATTGCTCAGGAAGACTGCCGTAACGGTTTCCTGCTTGACGGCTTCCCGCGTACTATTCCGCAGGCTGACGCGATGAAAGAAGCGGGCATCAATGTTGATTACGTTCTGGAGTTCGACGTACCGGACGAACTGATTGTTGATCGTATTGTTGGTCGTCGCGTTCACGCGCCATCTGGCCGTGTTTATCACGTTAAATTCAATCCGCCGAAAGTAGAAGG…	CGAGAGCCATTCGCCAGGCGGCGGATGAAGTGCTGGCAGGGCAACATGATGATGAGTTCCCGCTGGCAATCTGGCAAACGGGATCTGGTACGCAAAGCAATATGAATATGAATGAAGTACTGGCTAACCGGGCCAGCGAATTGCTTGGCGGCGTACGCGGAATGGAACGTAAAGTTCACCCTAACGATGACGTGAACAAAAGCCAAAGCTCCAATGATGTCTTCCCAACTGCTATGCACGTGGCGGCGTTATTGGCACTGCGTAAGCAACTCATTCCTCAGCTCAAAAACCTCACTCAAACTCTGAATGAGAAATCGCGCGCATTTGCCGATATCGTCAAAATTGGTCGTACCCACTTGCAGGACGCCACACCGCTGACCCTGGGACAGGAGATTTCTG…	GGTCTGCACGGCGTTGGTGTTTCGGTAGTAAACGCCCTGTCGCAAAAACTGGAGCTGGTTATTCAGCGCGAGGGTAAAATTCACCGTCAGATCTACGAACACGGTGTTCCGCAGGCACCGCTGGCGGTTACTGGTGACACCGACAAAACCGGCACCATGGTGCGTTTCTGGCCAAGCCTTGAAACTTTCACCAATGTGACCGAGTTCGAATACGATATTCTGGCGAAGCGTCTGCGTGAGCTGTCCTTCCTCAATTCCGGCGTGTCTATTCGTCTGAAAGACAAACGCGACGGCAAAGAAGACCACTTCCACTATGAAGGCGGCATTAAGGCGTTCGTTGAATATCTGAACAAGAACAAAACGCCGATTCACCCGAACATCTTCTACTTCTCCACCGAA…	CGATGCTGCCGTCGAGAAAGCCTATAAAGGTGAGCGTAAAATCTCCTGGATGGAAATTTACACCGGTGAAAAATCCACACAGGTTTATGGTCAGGACGTCTGGCTGCCTGCTGAAACCCTTGATCTGATTCGTGAATATCGCGTTGCTATCAAAGGCCCTCTGACCACTCCGGTTGGCGGCGGTATTCGTTCTCTTAACGTTGCCCTGCGTCAGGAGCTGGATCTTTACATCTGCCTGCGTCCGGTACGTTACTACCAGGGCACCCCAAGCCCGGTTAAACACCCTGAACTGACCGATATGGTTATCTTCCGTGAAAACTCGGAAGACATTTATGCGGGTATCGAATGGAAAGCTGACTCTGCCGACGCTGAGAAAGTGATCAAATTCCTGCGTGAAGA…	GGTGTAGCGCGTAAACCGGGTATGGATCGTTCCGACCTGTTTAACGTTAACGCCGGTATTGTGAAGAATCTGGTTCAGCAAGTTGCGAAAACTTGCCCGAAAGCGTGCATTGGCATTATCACTAACCCGGTTAACACCACTGTGGCTATCGCTGCGGAAGTGCTGAAAAAAGCCGGTGTTTATGACAAAAACAAGCTGTTTGGCGTTACTACGCTGGATATTATTCGTTCCAACACCTTTGTCGCGGAACTGAAAGGTAAACAACCGGGTGATGTAGAAGTGCCTGTTATTGGCGGTCACTCTGGCGTTACTATTCTGCCGCTGCTGTCACAGGTTCCTGGCGTCAGTTTTACCGAGCAGGAAGTCGCAGATCTGACCAAACGTATCCAGAACGCGGGC…	ATAACGCGCGTGAGAAAGCGCGTGGCGCGAAAGCGATCGGCACCACGGGGCGTGGTATCGGGCCTGCTTATGAAGATAAAGTAGCACGCCGCGGTCTGCGTGTTGGCGACCTTTTCGACAAAGAAACCTTCGCTGAAAAACTGAAAGAAGTGATGGAATATCACAACTTCCAGTTGGTTAACTACTACAAAGTTGAAGCGGTTGATTACCAGAAAGTTCTGGATGATGTGATGGCCGTTGCCGACATCCTGACTTCCATGGTGGTTGACGTTTCTGACCTGCTTGACCAGGCGCGTCAGCGTGGCGATTTCGTCATGTTTGAAGGTGCGCAGGGTACGCTTCTGGATATCGACCACGGTACTTATCCGTACGTAACCTCTTCCAACACCACTGCGGGTG…	TGCTCGTAAACTGGGCGTCGATATTGACAACCTGCTGTGTTCCCAGCCGGACACTGGCGAACAGGCGCTGGAAATCTGTGACGCCCTGGCGCGCTCTGGCGCAGTAGACGTTATCGTTGTTGACTCCGTAGCGGCACTGACGCCGAAAGCGGAAATCGAAGGTGAAATCGGCGACTCTCACATGGGCCTTGCGGCACGTATGATGAGCCAGGCGATGCGTAAGCTGGCGGGTAACCTGAAGCAGTCCAACACGCTGCTGATCTTCATCAACCAGATCCGTATGAAAATTGGTGTGATGTTCGGTAACCCGGAAACCACTACCGGTGGTAACGCGCTGAAATTCTACGCCTCTGTTCGTCTCGACATCCGTCGTATCGGCGCGGTGAAAGAGGGCGAAAA…
3294	GGGGAAAGGGACTCAGGCTCAGTTCATCATGGAGAAATATGGTATTCCGCAAATCTCCACAGGTGATATGCTGCGTGCCGCAGTCAAATCTGGCTCCGAGCTGGGTAAACAAGCAAAAGACATTATGGACGCTGGCAAACTGGTTACCGATGAACTGGTGATCGCGCTGGTTAAAGAACGTATTGCTCAGGAAGACTGCCGTAACGGTTTCCTGCTTGACGGCTTCCCGCGTACTATTCCGCAGGCTGACGCGATGAAAGAAGCGGGCATCAATGTTGATTACGTTCTGGAGTTCGACGTACCGGACGAACTGATTGTTGATCGTATTGTTGGTCGTCGCGTTCACGCGCCATCTGGCCGTGTTTATCACGTTAAATTCAATCCGCCGAAAGTAGAAGG…	CGAGAGCCATTCGCCAGGCGGCGGATGAAGTGCTGGCAGGGCAACATGATGATGAGTTCCCGCTGGCAATCTGGCAAACGGGATCTGGTACGCAAAGCAATATGAATATGAATGAAGTACTGGCTAACCGGGCCAGCGAATTGCTTGGCGGCGTACGCGGAATGGAACGTAAAGTTCACCCTAACGATGACGTGAACAAAAGCCAAAGCTCCAATGATGTCTTCCCAACTGCTATGCACGTGGCGGCGTTATTGGCACTGCGTAAGCAACTCATTCCTCAGCTCAAAAACCTCACTCAAACTCTGAATGAGAAATCGCGCGCATTTGCCGATATCGTCAAAATTGGTCGTACCCACTTGCAGGACGCCACACCGCTGACCCTGGGACAGGAGATTTCTG…	GGTCTGCACGGCGTTGGTGTTTCGGTAGTAAACGCCCTGTCGCAAAAACTGGAGCTGGTTATTCAGCGCGAGGGTAAAATTCACCGTCAGATCTACGAACACGGTGTTCCGCAGGCACCGCTGGCGGTTACTGGTGACACCGACAAAACCGGCACCATGGTGCGTTTCTGGCCAAGCCTTGAAACTTTCACCAATGTGACCGAGTTCGAATACGATATTCTGGCGAAGCGTCTGCGTGAGCTGTCCTTCCTCAATTCCGGCGTGTCTATTCGTCTGAAAGACAAACGCGACGGCAAAGAAGACCACTTCCACTATGAAGGCGGCATTAAGGCGTTCGTTGAATATCTGAACAAGAACAAAACGCCGATTCACCCGAACATCTTCTACTTCTCCACCGAA…	CGATGCTGCCGTCGAGAAAGCCTATAAAGGTGAGCGTAAAATCTCCTGGATGGAAATTTACACCGGTGAAAAATCCACACAGGTTTATGGTCAGGACGTCTGGCTGCCTGCTGAAACCCTTGATCTGATTCGTGAATATCGCGTTGCTATCAAAGGCCCTCTGACCACTCCGGTTGGCGGCGGTATTCGTTCTCTTAACGTTGCCCTGCGTCAGGAGCTGGATCTTTACATCTGCCTGCGTCCGGTACGTTACTACCAGGGCACCCCAAGCCCGGTTAAACACCCTGAACTGACCGATATGGTTATCTTCCGTGAAAACTCGGAAGACATTTATGCGGGTATCGAATGGAAAGCTGACTCTGCCGACGCTGAGAAAGTGATCAAATTCCTGCGTGAAGA…	GGTGTAGCGCGTAAACCGGGTATGGATCGTTCCGACCTGTTTAACGTTAACGCCGGTATTGTGAAGAATCTGGTTCAGCAAGTTGCGAAAACTTGCCCGAAAGCGTGCATTGGCATTATCACTAACCCGGTTAACACCACTGTGGCTATCGCTGCGGAAGTGCTGAAAAAAGCCGGTGTTTATGACAAAAACAAGCTGTTTGGCGTTACTACGCTGGATATTATTCGTTCCAACACCTTTGTCGCGGAACTGAAAGGTAAACAACCGGGTGATGTAGAAGTGCCTGTTATTGGCGGTCACTCTGGCGTTACTATTCTGCCGCTGCTGTCACAGGTTCCTGGCGTCAGTTTTACCGAGCAGGAAGTCGCAGATCTGACCAAACGTATCCAGAACGCGGGC…	ATAACGCGCGTGAGAAAGCGCGTGGCGCGAAAGCGATCGGCACCACGGGGCGTGGTATCGGGCCTGCTTATGAAGATAAAGTAGCACGCCGCGGTCTGCGTGTTGGCGACCTTTTCGACAAAGAAACCTTCGCTGAAAAACTGAAAGAAGTGATGGAATATCACAACTTCCAGTTGGTTAACTACTACAAAGTTGAAGCGGTTGATTACCAGAAAGTTCTGGATGATGTGATGGCCGTTGCCGACATCCTGACTTCCATGGTGGTTGACGTTTCTGACCTGCTTGACCAGGCGCGTCAGCGTGGCGATTTCGTCATGTTTGAAGGTGCGCAGGGTACGCTTCTGGATATCGACCACGGTACTTATCCGTACGTAACCTCTTCCAACACCACTGCGGGTG…	TGCTCGTAAACTGGGCGTCGATATTGACAACCTGCTGTGTTCCCAGCCGGACACTGGCGAACAGGCGCTGGAAATCTGTGACGCCCTGGCGCGCTCTGGCGCAGTAGACGTTATCGTTGTTGACTCCGTAGCGGCACTGACGCCGAAAGCGGAAATCGAAGGTGAAATCGGCGACTCTCACATGGGCCTTGCGGCACGTATGATGAGCCAGGCGATGCGTAAGCTGGCGGGTAACCTGAAGCAGTCCAACACGCTGCTGATCTTCATCAACCAGATCCGTATGAAAATTGGTGTGATGTTCGGTAACCCGGAAACCACTACCGGTGGTAACGCGCTGAAATTCTACGCCTCTGTTCGTCTCGACATCCGTCGTATCGGCGCGGTGAAAGAGGGCGAAAA…
3296	GGGGAAAGGGACTCAGGCTCAGTTCATCATGGAGAAATATGGTATTCCGCAAATCTCCACAGGTGATATGCTGCGTGCCGCAGTCAAATCTGGCTCCGAGCTGGGTAAACAAGCAAAAGACATTATGGACGCTGGCAAACTGGTTACCGATGAACTGGTGATCGCGCTGGTTAAAGAACGTATTGCTCAGGAAGACTGCCGTAACGGTTTCCTGCTTGACGGCTTCCCGCGTACTATTCCGCAGGCTGACGCGATGAAAGAAGCGGGCATCAATGTTGATTACGTTCTGGAGTTCGACGTACCGGACGAACTGATTGTTGATCGTATTGTTGGTCGTCGCGTTCACGCGCCATCTGGCCGTGTTTATCACGTTAAATTCAATCCGCCGAAAGTAGAAGG…	CGAGAGCCATTCGCCAGGCGGCGGATGAAGTGCTGGCAGGGCAACATGATGATGAGTTCCCGCTGGCAATCTGGCAAACGGGATCTGGTACGCAAAGCAATATGAATATGAATGAAGTACTGGCTAACCGGGCCAGCGAATTGCTTGGCGGCGTACGCGGAATGGAACGTAAAGTTCACCCTAACGATGACGTGAACAAAAGCCAAAGCTCCAATGATGTCTTCCCAACTGCTATGCACGTGGCGGCGTTATTGGCACTGCGTAAGCAACTCATTCCTCAGCTCAAAAACCTCACTCAAACTCTGAATGAGAAATCGCGCGCATTTGCCGATATCGTCAAAATTGGTCGTACCCACTTGCAGGACGCCACACCGCTGACCCTGGGACAGGAGATTTCTG…	GGTCTGCACGGCGTTGGTGTTTCGGTAGTAAACGCCCTGTCGCAAAAACTGGAGCTGGTTATTCAGCGCGAGGGTAAAATTCACCGTCAGATCTACGAACACGGTGTTCCGCAGGCACCGCTGGCGGTTACTGGTGACACCGACAAAACCGGCACCATGGTGCGTTTCTGGCCAAGCCTTGAAACTTTCACCAATGTGACCGAGTTCGAATACGATATTCTGGCGAAGCGTCTGCGTGAGCTGTCCTTCCTCAATTCCGGCGTGTCTATTCGTCTGAAAGACAAACGCGACGGCAAAGAAGACCACTTCCACTATGAAGGCGGCATTAAGGCGTTCGTTGAATATCTGAACAAGAACAAAACGCCGATTCACCCGAACATCTTCTACTTCTCCACCGAA…	CGATGCTGCCGTCGAGAAAGCCTATAAAGGTGAGCGTAAAATCTCCTGGATGGAAATTTACACCGGTGAAAAATCCACACAGGTTTATGGTCAGGACGTCTGGCTGCCTGCTGAAACCCTTGATCTGATTCGTGAATATCGCGTTGCTATCAAAGGCCCTCTGACCACTCCGGTTGGCGGCGGTATTCGTTCTCTTAACGTTGCCCTGCGTCAGGAGCTGGATCTTTACATCTGCCTGCGTCCGGTACGTTACTACCAGGGCACCCCAAGCCCGGTTAAACACCCTGAACTGACCGATATGGTTATCTTCCGTGAAAACTCGGAAGACATTTATGCGGGTATCGAATGGAAAGCTGACTCTGCCGACGCTGAGAAAGTGATCAAATTCCTGCGTGAAGA…	GGTGTAGCGCGTAAACCGGGTATGGATCGTTCCGACCTGTTTAACGTTAACGCCGGTATTGTGAAGAATCTGGTTCAGCAAGTTGCGAAAACTTGCCCGAAAGCGTGCATTGGCATTATCACTAACCCGGTTAACACCACTGTGGCTATCGCTGCGGAAGTGCTGAAAAAAGCCGGTGTTTATGACAAAAACAAGCTGTTTGGCGTTACTACGCTGGATATTATTCGTTCCAACACCTTTGTCGCGGAACTGAAAGGTAAACAACCGGGTGATGTAGAAGTGCCTGTTATTGGCGGTCACTCTGGCGTTACTATTCTGCCGCTGCTGTCACAGGTTCCTGGCGTCAGTTTTACCGAGCAGGAAGTCGCAGATCTGACCAAACGTATCCAGAACGCGGGC…	ATAACGCGCGTGAGAAAGCGCGTGGCGCGAAAGCGATCGGCACCACGGGGCGTGGTATCGGGCCTGCTTATGAAGATAAAGTAGCACGCCGCGGTCTGCGTGTTGGCGACCTTTTCGACAAAGAAACCTTCGCTGAAAAACTGAAAGAAGTGATGGAATATCACAACTTCCAGTTGGTTAACTACTACAAAGTTGAAGCGGTTGATTACCAGAAAGTTCTGGATGATGTGATGGCCGTTGCCGACATCCTGACTTCCATGGTGGTTGACGTTTCTGACCTGCTTGACCAGGCGCGTCAGCGTGGCGATTTCGTCATGTTTGAAGGTGCGCAGGGTACGCTTCTGGATATCGACCACGGTACTTATCCGTACGTAACCTCTTCCAACACCACTGCGGGTG…	TGCTCGTAAACTGGGCGTCGATATTGACAACCTGCTGTGTTCCCAGCCGGACACTGGCGAACAGGCGCTGGAAATCTGTGACGCCCTGGCGCGCTCTGGCGCAGTAGACGTTATCGTTGTTGACTCCGTAGCGGCACTGACGCCGAAAGCGGAAATCGAAGGTGAAATCGGCGACTCTCACATGGGCCTTGCGGCACGTATGATGAGCCAGGCGATGCGTAAGCTGGCGGGTAACCTGAAGCAGTCCAACACGCTGCTGATCTTCATCAACCAGATCCGTATGAAAATTGGTGTGATGTTCGGTAACCCGGAAACCACTACCGGTGGTAACGCGCTGAAATTCTACGCCTCTGTTCGTCTCGACATCCGTCGTATCGGCGCGGTGAAAGAGGGCGAAAA…
3299	GGGGAAAGGGACTCAGGCTCAGTTCATCATGGAGAAATATGGTATTCCGCAAATCTCCACAGGTGATATGCTGCGTGCCGCAGTCAAATCTGGCTCCGAGCTGGGTAAACAAGCAAAAGACATTATGGACGCTGGCAAACTGGTTACCGATGAACTGGTGATCGCGCTGGTTAAAGAACGTATTGCTCAGGAAGACTGCCGTAACGGTTTCCTGCTTGACGGCTTCCCGCGTACTATTCCGCAGGCTGACGCGATGAAAGAAGCGGGCATCAATGTTGATTACGTTCTGGAGTTCGACGTACCGGACGAACTGATTGTTGATCGTATTGTTGGTCGTCGCGTTCACGCGCCATCTGGCCGTGTTTATCACGTTAAATTCAATCCGCCGAAAGTAGAAGG…	CGAGAGCCATTCGCCAGGCGGCGGATGAAGTGCTGGCAGGGCAACATGATGATGAGTTCCCGCTGGCAATCTGGCAAACGGGATCTGGTACGCAAAGCAATATGAATATGAATGAAGTACTGGCTAACCGGGCCAGCGAATTGCTTGGCGGCGTACGCGGAATGGAACGTAAAGTTCACCCTAACGATGACGTGAACAAAAGCCAAAGCTCCAATGATGTCTTCCCAACTGCTATGCACGTGGCGGCGTTATTGGCACTGCGTAAGCAACTCATTCCTCAGCTCAAAAACCTCACTCAAACTCTGAATGAGAAATCGCGCGCATTTGCCGATATCGTCAAAATTGGTCGTACCCACTTGCAGGACGCCACACCGCTGACCCTGGGACAGGAGATTTCTG…	GGTCTGCACGGCGTTGGTGTTTCGGTAGTAAACGCCCTGTCGCAAAAACTGGAGCTGGTTATTCAGCGCGAGGGTAAAATTCACCGTCAGATCTACGAACACGGTGTTCCGCAGGCACCGCTGGCGGTTACTGGTGACACCGACAAAACCGGCACCATGGTGCGTTTCTGGCCAAGCCTTGAAACTTTCACCAATGTGACCGAGTTCGAATACGATATTCTGGCGAAGCGTCTGCGTGAGCTGTCCTTCCTCAATTCCGGCGTGTCTATTCGTCTGAAAGACAAACGCGACGGCAAAGAAGACCACTTCCACTATGAAGGCGGCATTAAGGCGTTCGTTGAATATCTGAACAAGAACAAAACGCCGATTCACCCGAACATCTTCTACTTCTCCACCGAA…	CGATGCTGCCGTCGAGAAAGCCTATAAAGGTGAGCGTAAAATCTCCTGGATGGAAATTTACACCGGTGAAAAATCCACACAGGTTTATGGTCAGGACGTCTGGCTGCCTGCTGAAACCCTTGATCTGATTCGTGAATATCGCGTTGCTATCAAAGGCCCTCTGACCACTCCGGTTGGCGGCGGTATTCGTTCTCTTAACGTTGCCCTGCGTCAGGAGCTGGATCTTTACATCTGCCTGCGTCCGGTACGTTACTACCAGGGCACCCCAAGCCCGGTTAAACACCCTGAACTGACCGATATGGTTATCTTCCGTGAAAACTCGGAAGACATTTATGCGGGTATCGAATGGAAAGCTGACTCTGCCGACGCTGAGAAAGTGATCAAATTCCTGCGTGAAGA…	GGTGTAGCGCGTAAACCGGGTATGGATCGTTCCGACCTGTTTAACGTTAACGCCGGTATTGTGAAGAATCTGGTTCAGCAAGTTGCGAAAACTTGCCCGAAAGCGTGCATTGGCATTATCACTAACCCGGTTAACACCACTGTGGCTATCGCTGCGGAAGTGCTGAAAAAAGCCGGTGTTTATGACAAAAACAAGCTGTTTGGCGTTACTACGCTGGATATTATTCGTTCCAACACCTTTGTCGCGGAACTGAAAGGTAAACAACCGGGTGATGTAGAAGTGCCTGTTATTGGCGGTCACTCTGGCGTTACTATTCTGCCGCTGCTGTCACAGGTTCCTGGCGTCAGTTTTACCGAGCAGGAAGTCGCAGATCTGACCAAACGTATCCAGAACGCGGGC…	ATAACGCGCGTGAGAAAGCGCGTGGCGCGAAAGCGATCGGCACCACGGGGCGTGGTATCGGGCCTGCTTATGAAGATAAAGTAGCACGCCGCGGTCTGCGTGTTGGCGACCTTTTCGACAAAGAAACCTTCGCTGAAAAACTGAAAGAAGTGATGGAATATCACAACTTCCAGTTGGTTAACTACTACAAAGTTGAAGCGGTTGATTACCAGAAAGTTCTGGATGATGTGATGGCCGTTGCCGACATCCTGACTTCCATGGTGGTTGACGTTTCTGACCTGCTTGACCAGGCGCGTCAGCGTGGCGATTTCGTCATGTTTGAAGGTGCGCAGGGTACGCTTCTGGATATCGACCACGGTACTTATCCGTACGTAACCTCTTCCAACACCACTGCGGGTG…	TGCTCGTAAACTGGGCGTCGATATTGACAACCTGCTGTGTTCCCAGCCGGACACTGGCGAACAGGCGCTGGAAATCTGTGACGCCCTGGCGCGCTCTGGCGCAGTAGACGTTATCGTTGTTGACTCCGTAGCGGCACTGACGCCGAAAGCGGAAATCGAAGGTGAAATCGGCGACTCTCACATGGGCCTTGCGGCACGTATGATGAGCCAGGCGATGCGTAAGCTGGCGGGTAACCTGAAGCAGTCCAACACGCTGCTGATCTTCATCAACCAGATCCGTATGAAAATTGGTGTGATGTTCGGTAACCCGGAAACCACTACCGGTGGTAACGCGCTGAAATTCTACGCCTCTGTTCGTCTCGACATCCGTCGTATCGGCGCGGTGAAAGAGGGCGAAAA…
3302	GGGGAAAGGGACTCAGGCTCAGTTCATCATGGAGAAATATGGTATTCCGCAAATCTCCACAGGTGATATGCTGCGTGCCGCAGTCAAATCTGGCTCCGAGCTGGGTAAACAAGCAAAAGACATTATGGACGCTGGCAAACTGGTTACCGATGAACTGGTGATCGCGCTGGTTAAAGAACGTATTGCTCAGGAAGACTGCCGTAACGGTTTCCTGCTTGACGGCTTCCCGCGTACTATTCCGCAGGCTGACGCGATGAAAGAAGCGGGCATCAATGTTGATTACGTTCTGGAGTTCGACGTACCGGACGAACTGATTGTTGATCGTATTGTTGGTCGTCGCGTTCACGCGCCATCTGGCCGTGTTTATCACGTTAAATTCAATCCGCCGAAAGTAGAAGG…	CGAGAGCCATTCGCCAGGCGGCGGATGAAGTGCTGGCAGGGCAACATGATGATGAGTTCCCGCTGGCAATCTGGCAAACGGGATCTGGTACGCAAAGCAATATGAATATGAATGAAGTACTGGCTAACCGGGCCAGCGAATTGCTTGGCGGCGTACGCGGAATGGAACGTAAAGTTCACCCTAACGATGACGTGAACAAAAGCCAAAGCTCCAATGATGTCTTCCCAACTGCTATGCACGTGGCGGCGTTATTGGCACTGCGTAAGCAACTCATTCCTCAGCTCAAAAACCTCACTCAAACTCTGAATGAGAAATCGCGCGCATTTGCCGATATCGTCAAAATTGGTCGTACCCACTTGCAGGACGCCACACCGCTGACCCTGGGACAGGAGATTTCTG…	GGTCTGCACGGCGTTGGTGTTTCGGTAGTAAACGCCCTGTCGCAAAAACTGGAGCTGGTTATTCAGCGCGAGGGTAAAATTCACCGTCAGATCTACGAACACGGTGTTCCGCAGGCACCGCTGGCGGTTACTGGTGACACCGACAAAACCGGCACCATGGTGCGTTTCTGGCCAAGCCTTGAAACTTTCACCAATGTGACCGAGTTCGAATACGATATTCTGGCGAAGCGTCTGCGTGAGCTGTCCTTCCTCAATTCCGGCGTGTCTATTCGTCTGAAAGACAAACGCGACGGCAAAGAAGACCACTTCCACTATGAAGGCGGCATTAAGGCGTTCGTTGAATATCTGAACAAGAACAAAACGCCGATTCACCCGAACATCTTCTACTTCTCCACCGAA…	CGATGCTGCCGTCGAGAAAGCCTATAAAGGTGAGCGTAAAATCTCCTGGATGGAAATTTACACCGGTGAAAAATCCACACAGGTTTATGGTCAGGACGTCTGGCTGCCTGCTGAAACCCTTGATCTGATTCGTGAATATCGCGTTGCTATCAAAGGCCCTCTGACCACTCCGGTTGGCGGCGGTATTCGTTCTCTTAACGTTGCCCTGCGTCAGGAGCTGGATCTTTACATCTGCCTGCGTCCGGTACGTTACTACCAGGGCACCCCAAGCCCGGTTAAACACCCTGAACTGACCGATATGGTTATCTTCCGTGAAAACTCGGAAGACATTTATGCGGGTATCGAATGGAAAGCTGACTCTGCCGACGCTGAGAAAGTGATCAAATTCCTGCGTGAAGA…	GGTGTAGCGCGTAAACCGGGTATGGATCGTTCCGACCTGTTTAACGTTAACGCCGGTATTGTGAAGAATCTGGTTCAGCAAGTTGCGAAAACTTGCCCGAAAGCGTGCATTGGCATTATCACTAACCCGGTTAACACCACTGTGGCTATCGCTGCGGAAGTGCTGAAAAAAGCCGGTGTTTATGACAAAAACAAGCTGTTTGGCGTTACTACGCTGGATATTATTCGTTCCAACACCTTTGTCGCGGAACTGAAAGGTAAACAACCGGGTGATGTAGAAGTGCCTGTTATTGGCGGTCACTCTGGCGTTACTATTCTGCCGCTGCTGTCACAGGTTCCTGGCGTCAGTTTTACCGAGCAGGAAGTCGCAGATCTGACCAAACGTATCCAGAACGCGGGC…	ATAACGCGCGTGAGAAAGCGCGTGGCGCGAAAGCGATCGGCACCACGGGGCGTGGTATCGGGCCTGCTTATGAAGATAAAGTAGCACGCCGCGGTCTGCGTGTTGGCGACCTTTTCGACAAAGAAACCTTCGCTGAAAAACTGAAAGAAGTGATGGAATATCACAACTTCCAGTTGGTTAACTACTACAAAGTTGAAGCGGTTGATTACCAGAAAGTTCTGGATGATGTGATGGCCGTTGCCGACATCCTGACTTCCATGGTGGTTGACGTTTCTGACCTGCTTGACCAGGCGCGTCAGCGTGGCGATTTCGTCATGTTTGAAGGTGCGCAGGGTACGCTTCTGGATATCGACCACGGTACTTATCCGTACGTAACCTCTTCCAACACCACTGCGGGTG…	TGCTCGTAAACTGGGCGTCGATATTGACAACCTGCTGTGTTCCCAGCCGGACACTGGCGAACAGGCGCTGGAAATCTGTGACGCCCTGGCGCGCTCTGGCGCAGTAGACGTTATCGTTGTTGACTCCGTAGCGGCACTGACGCCGAAAGCGGAAATCGAAGGTGAAATCGGCGACTCTCACATGGGCCTTGCGGCACGTATGATGAGCCAGGCGATGCGTAAGCTGGCGGGTAACCTGAAGCAGTCCAACACGCTGCTGATCTTCATCAACCAGATCCGTATGAAAATTGGTGTGATGTTCGGTAACCCGGAAACCACTACCGGTGGTAACGCGCTGAAATTCTACGCCTCTGTTCGTCTCGACATCCGTCGTATCGGCGCGGTGAAAGAGGGCGAAAA…
3307	GGGGAAAGGGACTCAGGCTCAGTTCATCATGGAGAAATATGGTATTCCGCAAATCTCCACAGGTGATATGCTGCGTGCTGCGGTCAAATCTGGCTCCGAGCTGGGTAAACAAGCAAAAGACATTATGGACGCTGGCAAACTGGTTACCGATGAACTGGTGATCGCGCTGGTTAAAGAACGTATTGCTCAGGAAGACTGCCGTAACGGTTTCCTGCTTGACGGCTTCCCGCGTACTATTCCGCAGGCTGACGCGATGAAAGAAGCGGGCATCAATGTTGATTACGTTCTGGAGTTCGACGTACCGGACGAACTGATTGTTGATCGTATTGTTGGTCGCCGCGTTCACGCGCCATCTGGCCGTGTTTATCACGTTAAATTCAATCCGCCGAAAGTAGAAGG…	CGAGAGCTATTCGCCAGGCGGCGGATGAAGTGCTGGCAGGGCAACATGATGATGAGTTCCCGCTGGCAATCTGGCAAACGGGATCTGGTACGCAAAGCAATATGAATATGAATGAAGTACTGGCTAACCGGGCCAGCGAATTGCTTGGCGGCGTACGCGGAATGGAACGTAAAGTTCACCCTAACGATGACGTGAACAAAAGCCAAAGCTCCAATGATGTCTTCCCAACTGCTATGCACGTGGCGGCGTTATTGGCACTGCGTAAGCAACTCATTCCTCAGCTCAAAAACCTCACTCAAACTCTGAATGAGAAATCGCGCGCATTTGCCGATATCGTCAAAATTGGTCGTACCCACTTGCAGGACGCCACACCGCTGACTCTGGGACAGGAGATTTCTG…	GGTCTGCACGGCGTTGGTGTTTCGGTAGTAAACGCCCTGTCGCAAAAACTGGAGCTGGTTATTCAGCGCGAGGGTAAAATTCACCGTCAGATCTACGAACACGGTGTTCCGCAGGAACCGCTGGCGGTTACTGGTGACACCGACAAAACCGGCACCATGGTGCGTTTCTGGCCAAGCCTTGAAACTTTCACCAATGTGACCGAGTTCGAATACGATATTCTGGCGAAGCGTCTGCGTGAGCTGTCCTTCCTCAATTCCGGCGTGTCTATTCGTCTGAAAGACAAACGCGACGGCAAAGAAGACCACTTCCACTATGAAGGCGGCATTAAGGCGTTCGTTGAATATCTGAACAAGAACAAAACGCCGATTCACCCGAACATCTTCTACTTCTCCACCGAA…	CGACGCTGCCGTCGAGAAAGCCTATAAAGGCGAGCGTAAAATCTCCTGGATGGAAATTTACACCGGTGAAAAATCCACACAGGTTTATGGTCAGGACGTCTGGTTGCCTGCTGAAACCCTTGATCTGATTCGTGAATATCGCGTTGCTATCAAAGGCCCTCTGACCACTCCGGTTGGCGGCGGTATTCGTTCTCTTAACGTTGCCCTGCGCCAGGAGCTGGATCTTTACATCTGCCTGCGTCCGGTACGTTACTACCAGGGCACCCCAAGCCCGGTTAAACACCCTGAACTGACCGATATGGTTATCTTCCGTGAAAACTCGGAAGACATTTATGCGGGTATCGAATGGAAAGCTGACTCTGCCGACGCTGAGAAAGTGATCAAATTCCTGCGTGAAGA…	GGTGTAGCGCGTAAACCGGGTATGGATCGTTCCGACCTGTTTAACGTTAACGCCGGTATTGTGAAGAATCTGGTTCAGCAAGTTGCGAAAACTTGCCCGAAAGCGTGCATTGGCATTATCACTAACCCGGTTAACACCACTGTGGCTATCGCTGCGGAAGTGCTGAAAAAAGCCGGTGTTTATGACAAAAACAAGCTGTTTGGCGTTACTACGCTGGATATTATTCGTTCCAACACCTTTGTCGCGGAACTGAAAGGTAAACAACCGGGTGATGTAGAAGTGCCGGTTATTGGCGGTCACTCTGGCGTTACTATTCTGCCGCTGCTGTCACAGGTTCCTGGCGTCAGTTTTACCGAGCAGGAAGTCGCAGATCTGACCAAACGTATCCAGAACGCGGGT…	ATAACGCGCGTGAGAAAGCGCGTGGCGCGAAAGCGATCGGCACCACGGGGCGTGGTATCGGGCCTGCTTATGAAGATAAAGTGGCACGTCGCGGTCTGCGTGTTGGCGACCTTTTCGACAAAGAAACCTTCGCTGAAAAACTGAAAGAAGTGATGGAATATCACAACTTCCAGTTGGTTAACTACTACAAAGTTGAAGCGGTTGATTACCAGAAAGTTCTGGATGATGTGATGGCCGTTGCCGACATCCTGACTTCCATGGTGGTTGACGTTTCTGACCTGCTCGATCAGGCGCGTCAGCGTGGCGATTTCGTCATGTTTGAAGGTGCGCAGGGTACGCTTCTGGATATCGACCACGGTACTTATCCGTACGTAACCTCTTCCAACACCACTGCGGGTG…	TGCTCGTAAACTGGGCGTCGATATCGACAACCTGCTGTGTTCCCAGCCGGACACTGGCGAACAGGCGCTGGAAATCTGTGACGCCCTGGCGCGCTCTGGCGCAGTAGATGTTATCGTTGTTGACTCCGTAGCGGCACTGACGCCGAAAGCGGAAATCGAAGGTGAAATCGGCGACTCTCACATGGGCCTTGCGGCACGTATGATGAGCCAGGCGATGCGTAAGCTGGCGGGTAACCTGAAGCAGTCCAACACGCTGCTGATCTTCATCAACCAGATCCGTATGAAAATTGGTGTGATGTTCGGTAACCCGGAAACCACTACCGGTGGTAACGCGCTGAAATTCTACGCCTCTGTTCGTCTCGACATCCGTCGTATCGGCGCGGTGAAAGAGGGCGAAAA…
3318	GGGGAAAGGGACTCAGGCTCAGTTCATCATGGAGAAATATGGTATTCCGCAAATCTCCACAGGTGATATGCTGCGTGCTGCGGTCAAATCTGGCTCCGAGCTGGGTAAACAAGCAAAAGACATTATGGACGCTGGCAAACTGGTTACCGATGAACTGGTGATCGCGCTGGTTAAAGAACGTATTGCTCAGGAAGACTGCCGTAACGGTTTCCTGCTTGACGGCTTCCCGCGTACTATTCCGCAGGCTGACGCGATGAAAGAAGCGGGCATCAATGTTGATTACGTTCTGGAGTTCGACGTACCGGACGAACTGATTGTTGATCGTATTGTTGGTCGCCGCGTTCACGCGCCATCTGGCCGTGTTTATCACGTTAAATTCAATCCGCCGAAAGTAGAAGG…	CGAGAGCTATTCGCCAGGCGGCGGATGAAGTGCTGGCAGGGCAACATGATGATGAGTTCCCGCTGGCAATCTGGCAAACGGGATCTGGTACGCAAAGCAATATGAATATGAATGAAGTACTGGCTAACCGGGCCAGCGAATTGCTTGGCGGCGTACGCGGAATGGAACGTAAAGTTCACCCTAACGATGACGTGAACAAAAGCCAAAGCTCCAATGATGTCTTCCCAACTGCTATGCACGTGGCGGCGTTATTGGCACTGCGTAAGCAACTCATTCCTCAGCTCAAAAACCTCACTCAAACTCTGAATGAGAAATCGCGCGCATTTGCCGATATCGTCAAAATTGGTCGTACCCACTTGCAGGACGCCACACCGCTGACTCTGGGACAGGAGATTTCTG…	GGTCTGCACGGCGTTGGTGTTTCGGTAGTAAACGCCCTGTCGCAAAAACTGGAGCTGGTTATTCAGCGCGAGGGTAAAATTCACCGTCAGATCTACGAACACGGTGTTCCGCAGGCACCGCTGGCGGTTACTGGTGACACCGACAAAACCGGCACCATGGTGCGTTTCTGGCCAAGCCTTGAAACTTTCACCAATGTGACCGAGTTCGAATACGATATTCTGGCGAAGCGTCTGCGTGAGCTGTCCTTCCTCAATTCCGGCGTGTCTATTCGTCTGAAAGACAAACGCGACGGCAAAGAAGACCACTTCCACTATGAAGGCGGCATTAAGGCGTTCGTTGAATATCTGAACAAGAACAAAACGCCGATTCACCCGAACATCTTCTACTTCTCCACCGAA…	CGACGCTGCCGTCGAGAAAGCCTATAAAGGCGAGCGTAAAATCTCCTGGATGGAAATTTACACCGGTGAAAAATCCACACAGGTTTATGGTCAGGACGTCTGGTTGCCTGCTGAAACCCTTGATCTGATTCGTGAATATCGCGTTGCTATCAAAGGCCCTCTGACCACTCCGGTTGGCGGCGGTATTCGTTCTCTTAACGTTGCCCTGCGCCAGGAGCTGGATCTTTACATCTGCCTGCGTCCGGTACGTTACTACCAGGGCACCCCAAGCCCGGTTAAACACCCTGAACTGACCGATATGGTTATCTTCCGTGAAAACTCGGAAGACATTTATGCGGGTATCGAATGGAAAGCTGACTCTGCCGACGCTGAGAAAGTGATCAAATTCCTGCGTGAAGA…	GGTGTAGCGCGTAAACCGGGTATGGATCGTTCCGACCTGTTTAACGTTAACGCCGGTATTGTGAAGAATCTGGTTCAGCAAGTTGCGAAAACTTGCCCGAAAGCGTGCATTGGCATTATCACTAACCCGGTTAACACCACTGTGGCTATCGCTGCGGAAGTGCTGAAAAAAGCCGGTGTTTATGACAAAAACAAGCTGTTTGGCGTTACTACGCTGGATATTATTCGTTCCAACACCTTTGTCGCGGAACTGAAAGGTAAACAACCGGGTGATGTAGAAGTGCCGGTTATTGGCGGTCACTCTGGCGTTACTATTCTGCCGCTGCTGTCACAGGTTCCTGGCGTCAGTTTTACCGAGCAGGAAGTCGCAGATCTGACCAAACGTATCCAGAACGCGGGT…	ATAACGCGCGTGAGAAAGCGCGTGGCGCGAAAGCGATCGGCACCACGGGGCGTGGTATCGGGCCTGCTTATGAAGATAAAGTGGCACGTCGCGGTCTGCGTGTTGGCGACCTTTTCGACAAAGAAACCTTCGCTGAAAAACTGAAAGAAGTGATGGAATATCACAACTTCCAGTTGGTTAACTACTACAAAGTTGAAGCGGTTGATTACCAGAAAGTTCTGGATGATGTGATGGCCGTTGCCGACATCCTGACTTCCATGGTGGTTGACGTTTCTGACCTGCTCGATCAGGCGCGTCAGCGTGGCGATTTCGTCATGTTTGAAGGTGCGCAGGGTACGCTTCTGGATATCGACCACGGTACTTATCCGTACGTAACCTCTTCCAACACCACTGCGGGTG…	TGCTCGTAAACTGGGCGTCGATATCGACAACCTGCTGTGTTCCCAGCCGGACACTGGCGAACAGGCGCTGGAAATCTGTGACGCTCTGGCGCGCTCTGGCGCAGTAGATGTTATCGTTGTTGACTCCGTAGCGGCACTGACGCCGAAAGCGGAAATCGAAGGTGAAATCGGCGACTCTCACATGGGCCTTGCGGCACGTATGATGAGCCAGGCGATGCGTAAGCTGGCGGGTAACCTGAAGCAGTCCAACACGCTGCTGATCTTCATCAACCAGATCCGTATGAAAATTGGTGTGATGTTCGGTAACCCGGAAACCACTACCGGTGGTAACGCGCTGAAATTCTACGCCTCTGTTCGTCTCGACATCCGTCGTATCGGCGCGGTGAAAGAGGGCGAAAA…
3319	GGGGAAAGGGACTCAGGCTCAGTTCATCATGGAGAAATATGGTATTCCGCAAATCTCCACAGGTGATATGCTGCGTGCTGCGGTCAAATCTGGCTCCGAGCTGGGTAAACAAGCAAAAGACATTATGGACGCTGGCAAACTGGTTACCGATGAACTGGTGATCGCGCTGGTTAAAGAACGTATTGCTCAGGAAGACTGCCGTAACGGTTTCCTGCTTGACGGCTTCCCGCGTACTATTCCGCAGGCTGACGCGATGAAAGAAGCGGGCATCAATGTTGATTACGTTCTGGAGTTCGACGTACCGGACGAACTGATTGTTGATCGTATTGTTGGTCGCCGCGTTCACGCGCCATCTGGCCGTGTTTATCACGTTAAATTCAATCCGCCGAAAGTAGAAGG…	CGAGAGCCATTCGCCAGGCGGCGGATGAAGTGCTGGCAGGGCAACATGATGATGAGTTCCCGCTGGCAATCTGGCAAACGGGATCCGGTACGCAAAGCAATATGAATATGAATGAAGTACTGGCTAATCGGGCCAGCGAATTGCTTGGCGGCGTACGCGGAATGGAACGTAAAGTTCACCCTAACGATGACGTGAACAAAAGCCAAAGCTCCAATGATGTCTTCCCAACTGCTATGCACGTAGCGGCGTTATTGGCACTGCGTAAGCAACTCATTCCTCAGCTCAAAAACCTCACTCAAACTCTGAATGAGAAATCGCGCGCATTTGCCGATATCGTCAAAATTGGTCGTACCCACTTGCAGGACGCCACACCGCTGACCCTGGGACAGGAGATTTCTG…	GGTCTGCACGGCGTTGGTGTTTCGGTAGTAAACGCCCTGTCGCAAAAACTGGAGCTGGTTATTCAGCGCGAGGGTAAAATTCACCGTCAGATCTACGAACACGGTGTTCCGCAGGCACCGCTGGCGGTTACTGGTGACACCGACAAAACCGGCACCATGGTGCGTTTCTGGCCAAGCCTTGAAACTTTCACCAATGTGACCGAGTTCGAATACGATATTCTGGCGAAGCGTCTGCGTGAGCTGTCCTTCCTCAACTCCGGCGTGTCTATTCGTCTGAAAGACAAACGCGACGGCAAAGAAGACCACTTCCACTATGAAGGCGGCATTAAGGCGTTCGTTGAATATCTGAACAAGAACAAAACGCCGATTCACCCGAACATCTTCTACTTCTCCACCGAA…	CGATGCTGCCGTCGAGAAAGCCTATAAAGGTGAGCGTAAAATCTCCTGGATGGAAATTTACACCGGTGAAAAATCCACACAGGTTTATGGTCAGGACGTCTGGCTGCCTGCTGAAACCCTTGATCTGATTCGTGAATATCGCGTTGCTATCAAAGGCCCTCTGACCACTCCGGTTGGCGGCGGTATTCGTTCTCTTAACGTTGCCCTGCGTCAGGAGCTGGATCTTTACATCTGCCTGCGTCCGGTACGTTACTACCAGGGCACCCCAAGCCCGGTTAAACACCCTGAACTGACCGATATGGTTATCTTCCGTGAAAACTCGGAAGACATTTATGCGGGTATCGAATGGAAAGCTGACTCTGCCGACGCAGAGAAAGTGATTAAATTCCTGCGTGAAGA…	GGTGTAGCGCGTAAACCGGGTATGGATCGTTCCGACCTGTTTAACGTTAACGCCGGTATTGTGAAGAATCTGGTTCAGCAAGTTGCGAAAACTTGCCCGAAAGCGTGCATTGGCATTATCACTAACCCGGTTAACACCACTGTGGCTATCGCTGCGGAAGTGCTGAAAAAAGCCGGTGTTTATGACAAAAACAAGCTGTTTGGCGTTACTACGCTGGATATTATTCGTTCCAACACCTTTGTCGCGGAACTGAAAGGTAAACAACCGGGTGATGTAGAAGTGCCTGTTATTGGCGGTCACTCTGGCGTTACTATTCTGCCGCTGCTGTCACAGGTTCCTGGCGTCAGTTTTACCGAGCAGGAAGTCGCAGATCTGACCAAACGTATCCAGAACGCGGGC…	ATAACGCGCGTGAGAAAGCGCGCGGCGCGAAAGCGATCGGCACCACGGGGCGTGGTATCGGGCCTGCTTATGAAGATAAAGTGGCACGTCGCGGTCTGCGTGTTGGCGACCTTTTCGACAAAGAAACCTTCGCTGAAAAACTGAAAGAAGTGATGGAATATCACAACTTCCAGTTGGTTAACTACTACAAAGTTGAAGCGGTTGATTACCAGAAAGTTCTGGATGATGTGATGGCCGTTGCCGACATCCTGACTTCCATGGTGGTTGACGTTTCTGACCTGCTTGACCAGGCGCGTCAGCGTGGCGATTTCGTCATGTTTGAAGGTGCGCAGGGTACGCTTCTGGATATCGACCACGGTACTTATCCGTACGTAACCTCTTCCAACACCACTGCGGGCG…	TGCTCGTAAACTGGGCGTCGATATCGACAACCTGCTGTGTTCCCAGCCGGACACTGGCGAACAGGCGCTGGAAATCTGTGACGCCCTGGCGCGCTCTGGCGCAGTAGATGTTATCGTTGTTGACTCCGTAGCGGCACTGACGCCGAAAGCGGAAATCGAAGGTGAAATCGGCGACTCTCACATGGGCCTTGCGGCACGTATGATGAGCCAGGCGATGCGTAAGCTGGCGGGTAACCTGAAGCAGTCCAACACGCTGCTGATCTTCATCAACCAGATCCGTATGAAAATTGGTGTGATGTTCGGTAACCCGGAAACCACTACCGGTGGTAACGCGCTGAAATTCTACGCCTCTGTTCGTCTCGACATCCGTCGTATCGGCGCGGTGAAAGAGGGCGAAAA…
3325	GGGGAAAGGGACTCAGGCTCAGTTCATCATGGAGAAATATGGTATTCCGCAAATCTCCACAGGTGATATGCTGCGTGCTGCGGTCAAATCTGGCTCCGAGCTGGGTAAACAAGCAAAAGACATTATGGACGCTGGCAAACTGGTTACCGATGAACTGGTGATCGCGCTGGTTAAAGAACGTATTGCTCAGGAAGACTGCCGTAACGGTTTCCTGCTTGACGGCTTCCCGCGTACTATTCCGCAGGCTGACGCGATGAAAGAAGCGGGCATCAATGTTGATTACGTTCTGGAGTTCGACGTACCGGACGAACTGATTGTTGATCGTATTGTTGGTCGCCGCGTTCACGCGCCATCTGGCCGTGTTTATCACGTTAAATTCAATCCGCCGAAAGTAGAAGG…	CGAGAGCTATTCGCCAGGCGGCGGATGAAGTGCTGGCAGGGCAACATGATGATGAGTTCCCGCTGGCAATCTGGCAAACGGGATCTGGTACGCAAAGCAATATGAATATGAATGAAGTACTGGCTAACCGGGCCAGCGAATTGCTTGGCGGCGTACGCGGAATGGAACGTAAAGTTCACCCTAACGATGACGTGAACAAAAGCCAAAGCTCCAATGATGTCTTCCCAACTGCTATGCACGTGGCGGCGTTATTGGCACTGCGTAAGCAACTCATTCCTCAGCTCAAAAACCTCACTCAAACTCTGAATGAGAAATCGCGCGCATTTGCCGATATCGTCAAAATTGGTCGTACCCACTTGCAGGACGCCACACCGCTGACTCTGGGACAGGAGATTTCTG…	GGTCTGCACGGCGTTGGTGTTTCGGTAGTAAACGCCCTGTCGCAAAAACTGGAGCTGGTTATTCAGCGCGAGGGTAAAATTCACCGTCAGATCTACGAACACGGTGTTCCGCAGGCACCGCTGGCGGTTACTGGTGACACCGACAAAACCGGCACCATGGTGCGTTTCTGGCCAAGCCTTGAAACTTTCACCAATGTGACCGAGTTCGAATACGATATTCTGGCGAAGCGTCTGCGTGAGCTGTCCTTCCTCAATTCCGGCGTGTCTATTCGTCTGAAAGACAAACGCGACGGCAAAGAAGACCACTTCCACTATGAAGGCGGCATTAAGGCGTTCGTTGAATATCTGAACAAGAACAAAACGCCGATTCACCCGAACATCTTCTACTTCTCCACCGAA…	CGATGCTGCCGTCGAGAAAGCCTATAAAGGTGAGCGTAAAATCTCCTGGATGGAAATTTACACCGGTGAAAAATCCACACAGGTTTATGGTCAGGACGTCTGGCTGCCTGCTGAAACCCTTGATCTGATTCGTGAATATCGCGTTGCTATCAAAGGCCCTCTGACCACTCCGGTTGGCGGCGGTATTCGTTCTCTTAACGTTGCCCTGCGCCAGGAGCTGGATCTTTACATCTGCCTGCGTCCGGTACGTTACTACCAGGGCACTCCAAGCCCGGTTAAACACCCTGAACTGACCGATATGGTTATCTTCCGTGAAAACTCGGAAGACATTTATGCGGGTATCGAATGGAAAGCTGACTCTGCCGACGCTGAGAAAGTGATCAAATTCCTGCGTGGAGA…	GGTGTAGCGCGTAAACCGGGTATGGATCGTTCCGACCTGTTTAACGTTAACGCCGGTATTGTGAAGAATCTGGTTCAGCAAGTTGCGAAAACTTGCCCGAAAGCGTGCATTGGCATTATCACTAACCCGGTTAACACCACTGTGGCTATCGCTGCGGAAGTGCTGAAAAAAGCCGGTGTTTATGACAAAAACAAGCTGTTTGGCGTTACTACGCTGGATATTATTCGTTCCAACACCTTTGTCGCGGAACTGAAAGGTAAACAACCGGGTGATGTAGAAGTGCCGGTTATTGGCGGTCACTCTGGCGTTACTATTCTGCCGCTGCTGTCACAGGTTCCTGGCGTCAGTTTTACCGAGCAGGAAGTCGCAGATCTGACCAAACGTATCCAGAACGCGGGT…	ATAACGCGCGTGAGAAAGCGCGTGGCGCGAAAGCGATCGGCACCACGGGGCGTGGTATCGGGCCTGCTTATGAAGATAAAGTGGCACGTCGCGGTCTGCGTGTTGGCGACCTTTTCGACAAAGAAACCTTCGCTGAAAAACTGAAAGAAGTGATGGAATATCACAACTTCCAGTTGGTTAACTACTACAAAGTTGAAGCGGTTGATTACCAGAAAGTTCTGGATGATGTGATGGCCGTTGCCGACATCCTGACTTCCATGGTGGTTGACGTTTCTGACCTGCTCGATCAGGCGCGTCAGCGTGGCGATTTCGTCATGTTTGAAGGTGCGCAGGGTACGCTTCTGGATATCGACCACGGTACTTATCCGTACGTAACCTCTTCCAACACCACTGCGGGTG…	TGCTCGTAAACTGGGCGTCGATATCGACAACCTGCTGTGTTCCCAGCCGGACACTGGCGAACAGGCGCTGGAAATCTGTGACGCCCTGGCGCGCTCTGGCGCAGTAGATGTTATCGTTGTTGACTCCGTAGCGGCACTGACGCCGAAAGCGGAAATCGAAGGTGAAATCGGCGACTCTCACATGGGCCTTGCGGCACGTATGATGAGCCAGGCGATGCGTAAGCTGGCGGGTAACCTGAAGCAGTCCAACACGCTGCTGATCTTCATCAACCAGATCCGTATGAAAATTGGTGTGATGTTCGGTAACCCGGAAACCACTACCGGTGGTAACGCGCTGAAATTCTACGCCTCTGTTCGTCTCGACATCCGTCGTATCGGCGCGGTGAAAGAGGGCGAAAA…
3332	GGGGAAAGGGACTCAGGCTCAGTTCATCATGGAGAAATATGGTATTCCGCAAATCTCCACAGGTGATATGCTGCGTGCTGCGGTCAAATCTGGCTCCGAGCTGGGTAAACAAGCAAAAGACATTATGGACGCTGGCAAACTGGTTACCGATGAACTGGTGATCGCGCTGGTTAAAGAACGTATTGCTCAGGAAGACTGCCGTAACGGTTTCCTGCTTGACGGCTTCCCGCGTACTATTCCGCAGGCTGACGCGATGAAAGAAGCGGGCATCAATGTTGATTACGTTCTGGAGTTCGACGTACCGGACGAACTGATTGTTGATCGTATTGTTGGTCGCCGCGTTCACGCGCCATCTGGCCGTGTTTATCACGTTAAATTCAATCCGCCGAAAGTAGAAGG…	CGAGAGCTATTCGCCAGGCGGCGGATGAAGTGCTGGCAGGGCAACATGATGATGAGTTCCCGCTGGCAATCTGGCAAACGGGATCTGGTACGCAAAGCAATATGAATATGAATGAAGTACTGGCTAACCGGGCCAGCGAATTGCTTGGCGGCGTACGCGGAATGGAACGTAAAGTTCACCCTAACGATGACGTGAACAAAAGCCAAAGCTCCAATGATGTCTTCCCAACTGCTATGCACGTGGCGGCGTTATTGGCACTGCGTAAGCAACTCATTCCTCAGCTCAAAAACCTCACTCAAACTCTGAATGAGAAATCGCGCGCATTTGCCGATATCGTCAAAATTGGTCGTACCCACTTGCAGGACGCCACACCGCTGACTCTGGGACAGGAGATTTCTG…	GGTCTGCACGGCGTTGGTGTTTCGGTAGTAAACGCCCTGTCGCAAAAACTGGAGCTGGTTATTCAGCGCGAGGGTAAAATTCACCGTCAGATCTACGAACACGGTGTTCCGCAGGCACCGCTGGCGGTTACTGGTGACACCGACAAAACCGGCACCATGGTGCGTTTCTGGCCAAGCCTTGAAACTTTCACCAATGTGACCGAGTTCGAATACGATATTCTGGCGAAGCGTCTGCGTGAGCTGTCCTTCCTCAATTCCGGCGTGTCTATTCGTCTGAAAGACAAACGCGACGGCAAAGAAGACCACTTCCACTATGAAGGCGGCATTAAGGCGTTCGTTGAATATCTGAACAAGAACAAAACGCCGATTCACCCGAACATCTTCTACTTCTCCACCGAA…	CGATGCTGCCGTCGAGAAAGCCTATAAAGGTGAGCGTAAAATCTCCTGGATGGAAATTTACACCGGTGAAAAATCCACACAGGTTTATGGTCAGGACGTCTGGCTGCCTGCTGAAACCCTTGATCTGATTCGTGAATATCGCGTTGCTATCAAAGGCCCTCTGACCACTCCGGTTGGCGGCGGTATTCGTTCTCTTAACGTTGCCCTGCGCCAGGAGCTGGATCTTTACATCTGCCTGCGTCCGGTACGTTACTACCAGGGCACTCCAAGCCCGGTTAAACACCCTGAACTGACCGATATGGTTATCTTCCGTGAAAACTCGGAAGACATTTATGCGGGTATCGAATGGAAAGCTGACTCTGCCGACGCTGAGAAAGTGATCAAATTCCTGCGTGGAGA…	GGTGTAGCGCGTAAACCGGGTATGGATCGTTCCGACCTGTTTAACGTTAACGCCGGTATTGTGAAGAATCTGGTTCAGCAAGTTGCGAAAACTTGCCCGAAAGCGTGCATTGGCATTATCACTAACCCGGTTAACACCACTGTGGCTATCGCTGCGGAAGTGCTGAAAAAAGCCGGTGTTTATGACAAAAACAAGCTGTTTGGCGTTACTACGCTGGATATTATTCGTTCCAACACCTTTGTCGCGGAACTGAAAGGTAAACAACCGGGTGATGTAGAAGTGCCGGTTATTGGCGGTCACTCTGGCGTTACTATTCTGCCGCTGCTGTCACAGGTTCCTGGCGTCAGTTTTACCGAGCAGGAAGTCGCAGATCTGACCAAACGTATCCAGAACGCGGGT…	ATAACGCGCGTGAGAAAGCGCGTGGCGCGAAAGCGATCGGCACCACGGGGCGTGGTATCGGGCCTGCTTATGAAGATAAAGTGGCACGTCGCGGTCTGCGTGTTGGCGACCTTTTCGACAAAGAAACCTTCGCTGAAAAACTGAAAGAAGTGATGGAATATCACAACTTCCAGTTGGTTAACTACTACAAAGTTGAAGCGGTTGATTACCAGAAAGTTCTGGATGATGTGATGGCCGTTGCCGACATCCTGACTTCCATGGTGGTTGACGTTTCTGACCTGCTCGATCAGGCGCGTCAGCGTGGCGATTTCGTCATGTTTGAAGGTGCGCAGGGTACGCTTCTGGATATCGACCACGGTACTTATCCGTACGTAACCTCTTCCAACACCACTGCGGGTG…	TGCTCGTAAACTGGGCGTCGATATCGACAACCTGCTGTGTTCCCAGCCGGACACTGGCGAACAGGCGCTGGAAATCTGTGACGCCCTGGCGCGCTCTGGCGCAGTAGATGTTATCGTTGTTGACTCCGTAGCGGCACTGACGCCGAAAGCGGAAATCGAAGGTGAAATCGGCGACTCTCACATGGGCCTTGCGGCACGTATGATGAGCCAGGCGATGCGTAAGCTGGCGGGTAACCTGAAGCAGTCCAACACGCTGCTGATCTTCATCAACCAGATCCGTATGAAAATTGGTGTGATGTTCGGTAACCCGGAAACCACTACCGGTGGTAACGCGCTGAAATTCTACGCCTCTGTTCGTCTCGACATCCGTCGTATCGGCGCGGTGAAAGAGGGCGAAAA…
3333	GGGGAAAGGGACTCAGGCTCAGTTCATCATGGAGAAATATGGTATTCCGCAAATCTCCACAGGTGATATGCTGCGTGCTGCGGTCAAATCTGGCTCCGAGCTGGGTAAACAAGCAAAAGACATTATGGACGCTGGCAAACTGGTTACCGATGAACTGGTGATCGCGCTGGTTAAAGAACGTATTGCTCAGGAAGACTGCCGTAACGGTTTCCTGCTTGACGGCTTCCCGCGTACTATTCCGCAGGCTGACGCGATGAAAGAAGCGGGCATCAATGTTGATTACGTTCTGGAGTTCGACGTACCGGACGAACTGATTGTTGATCGTATTGTTGGTCGCCGCGTTCACGCGCCATCTGGCCGTGTTTATCACGTTAAATTCAATCCGCCGAAAGTAGAAGG…	CGAGAGCTATTCGCCAGGCGGCGGATGAAGTGCTGGCAGGGCAACATGATGATGAGTTCCCGCTGGCAATCTGGCAAACGGGATCTGGTACGCAAAGCAATATGAATATGAATGAAGTACTGGCTAACCGGGCCAGCGAATTGCTTGGCGGCGTACGCGGAATGGAACGTAAAGTTCACCCTAACGATGACGTGAACAAAAGCCAAAGCTCCAATGATGTCTTCCCAACTGCTATGCACGTGGCGGCGTTATTGGCACTGCGTAAGCAACTCATTCCTCAGCTCAAAAACCTCACTCAAACTCTGAATGAGAAATCGCGCGCATTTGCCGATATCGTCAAAATTGGTCGTACCCACTTGCAGGACGCCACACCGCTGACTCTGGGACAGGAGATTTCTG…	GGTCTGCACGGCGTTGGTGTTTCGGTAGTAAACGCCCTGTCGCAAAAACTGGAGCTGGTTATTCAGCGCGAGGGTAAAATTCACCGTCAGATCTACGAACACGGTGTTCCGCAGGCACCGCTGGCGGTTACTGGTGACACCGACAAAACCGGCACCATGGTGCGTTTCTGGCCAAGCCTTGAAACTTTCACCAATGTGACCGAGTTCGAATACGATATTCTGGCGAAGCGTCTGCGTGAGCTGTCCTTCCTCAATTCCGGCGTGTCTATTCGTCTGAAAGACAAACGCGACGGCAAAGAAGACCACTTCCACTATGAAGGCGGCATTAAGGCGTTCGTTGAATATCTGAACAAGAACAAAACGCCGATTCACCCGAACATCTTCTACTTCTCCACCGAA…	CGATGCTGCCGTCGAGAAAGCCTATAAAGGTGAGCGTAAAATCTCCTGGATGGAAATTTACACCGGTGAAAAATCCACACAGGTTTATGGTCAGGACGTCTGGCTGCCTGCTGAAACCCTTGATCTGATTCGTGAATATCGCGTTGCTATCAAAGGCCCTCTGACCACTCCGGTTGGCGGCGGTATTCGTTCTCTTAACGTTGCCCTGCGCCAGGAGCTGGATCTTTACATCTGCCTGCGTCCGGTACGTTACTACCAGGGCACTCCAAGCCCGGTTAAACACCCTGAACTGACCGATATGGTTATCTTCCGTGAAAACTCGGAAGACATTTATGCGGGTATCGAATGGAAAGCTGACTCTGCCGACGCAGAGAAAGTGATTAAATTCCTGCGTGAAGA…	GGTGTAGCGCGTAAACCGGGTATGGATCGTTCCGACCTGTTTAACGTTAACGCCGGTATTGTGAAGAATCTGGTTCAGCAAGTTGCGAAAACTTGCCCGAAAGCGTGCATTGGCATTATCACTAACCCGGTTAACACCACTGTGGCTATCGCTGCGGAAGTGCTGAAAAAAGCCGGTGTTTATGACAAAAACAAGCTGTTTGGCGTTACTACGCTGGATATTATTCGTTCCAACACCTTTGTCGCGGAACTGAAAGGTAAACAACCGGGTGATGTAGAAGTGCCGGTTATTGGCGGTCACTCTGGCGTTACTATTCTGCCGCTGCTGTCACAGGTTCCTGGCGTCAGTTTTACCGAGCAGGAAGTCGCAGATCTGACCAAACGTATCCAGAACGCGGGT…	ATAACGCGCGTGAGAAAGCGCGTGGCGCGAAAGCGATCGGCACCACGGGGCGTGGTATCGGGCCTGCTTATGAAGATAAAGTGGCACGTCGCGGTCTGCGTGTTGGCGACCTTTTCGACAAAGAAACCTTCGCTGAAAAACTGAAAGAAGTGATGGAATATCACAACTTCCAGTTGGTTAACTACTACAAAGTTGAAGCGGTTGATTACCAGAAAGTTCTGGATGATGTGATGGCCGTTGCCGACATCCTGACTTCCATGGTGGTTGACGTTTCTGACCTGCTCGATCAGGCGCGTCAGCGTGGCGATTTCGTCATGTTTGAAGGTGCGCAGGGTACGCTTCTGGATATCGACCACGGTACTTATCCGTACGTAACCTCTTCCAACACCACTGCGGGCG…	TGCTCGTAAACTGGGCGTCGATATCGACAACCTGCTGTGTTCCCAGCCGGACACTGGCGAACAGGCGCTGGAAATCTGTGACGCCCTGGCGCGCTCTGGCGCAGTAGATGTTATCGTTGTTGACTCCGTAGCGGCACTGACGCCGAAAGCGGAAATCGAAGGTGAAATCGGCGACTCTCACATGGGCCTTGCGGCACGTATGATGAGCCAGGCGATGCGTAAGCTGGCGGGTAACCTGAAGCAGTCCAACACGCTGCTGATCTTCATCAACCAGATCCGTATGAAAATTGGTGTGATGTTCGGTAACCCGGAAACCACTACCGGTGGTAACGCGCTGAAATTCTACGCCTCTGTTCGTCTCGACATCCGTCGTATCGGCGCGGTGAAAGAGGGCGAAAA…
3335	GGGGAAAGGGACTCAGGCTCAGTTCATCATGGAGAAATATGGTATTCCGCAAATCTCCACAGGTGATATGCTGCGTGCTGCGGTCAAATCTGGCTCCGAGCTGGGTAAACAAGCAAAAGACATTATGGACGCTGGCAAACTGGTTACCGATGAACTGGTGATCGCGCTGGTTAAAGAACGTATTGCTCAGGAAGACTGCCGTAACGGTTTCCTGCTTGACGGCTTCCCGCGTACTATTCCGCAGGCTGACGCGATGAAAGAAGCGGGCATCAATGTTGATTACGTTCTGGAGTTCGACGTACCGGACGAACTGATTGTTGATCGTATTGTTGGTCGCCGCGTTCACGCGCCATCTGGCCGTGTTTATCACGTTAAATTCAATCCGCCGAAAGTAGAAGG…	CGAGAGCTATTCGCCAGGCGGCGGATGAAGTGCTGGCAGGGCAACATGATGATGAGTTCCCGCTGGCAATCTGGCAAACGGGATCTGGTACGCAAAGCAATATGAATATGAATGAAGTACTGGCTAACCGGGCCAGCGAATTGCTTGGCGGCGTACGCGGAATGGAACGTAAAGTTCACCCTAACGATGACGTGAACAAAAGCCAAAGCTCCAATGATGTCTTCCCAACTGCTATGCACGTGGCGGCGTTATTGGCACTGCGTAAGCAACTCATTCCTCAGCTCAAAAACCTCACTCAAACTCTGAATGAGAAATCGCGCGCATTTGCCGATATCGTCAAAATTGGTCGTACCCACTTGCAGGACGCCACACCGCTGACTCTGGGACAGGAGATTTCTG…	GGTCTGCACGGCGTTGGTGTTTCGGTAGTAAACGCCCTGTCGCAAAAACTGGAGCTGGTTATTCAGCGCGAGGGTAAAATTCACCGTCAGATCTACGAACACGGTGTTCCGCAGGCACCGCTGGCGGTTACTGGTGACACCGACAAAACCGGCACCATGGTGCGTTTCTGGCCAAGCCTTGAAACTTTCACCAATGTGACCGAGTTCGAATACGATATTCTGGCGAAGCGTCTGCGTGAGCTGTCCTTCCTCAATTCCGGCGTGTCTATTCGTCTGAAAGACAAACGCGACGGCAAAGAAGACCACTTCCACTATGAAGGCGGCATTAAGGCGTTCGTTGAATATCTGAACAAGAACAAAACGCCGATTCACCCGAACATCTTCTACTTCTCCACCGAA…	CGACGCTGCCGTCGAGAAAGCCTATAAAGGCGAGCGTAAAATCTCCTGGATGGAAATTTACACCGGTGAAAAATCCACACAGGTTTATGGTCAGGACGTCTGGCTGCCTGCTGAAACCCTTGATCTGATTCGTGAATATCGCGTTGCTATCAAAGGCCCTCTGACCACTCCGGTTGGCGGCGGTATTCGTTCTCTTAACGTTGCCCTGCGCCAGGAGCTGGATCTTTACATCTGCCTGCGTCCGGTACGTTACTACCAGGGCACTCCAAGCCCGGTTAAACACCCTGAACTGACCGATATGGTTATCTTCCGTGAAAACTCGGAAGACATTTATGCGGGTATCGAATGGAAAGCTGACTCTGCCGACGCAGAGAAAGTGATTAAATTCCTGCGTGAAGA…	GGTGTAGCGCGTAAACCGGGTATGGATCGTTCCGACCTGTTTAACGTTAACGCCGGTATTGTGAAGAATCTGGTTCAGCAAGTTGCGAAAACTTGCCCGAAAGCGTGCATTGGCATTATCACTAACCCGGTTAACACCACTGTGGCTATCGCTGCGGAAGTGCTGAAAAAAGCCGGTGTTTATGACAAAAACAAGCTGTTTGGCGTTACTACGCTGGATATTATTCGTTCCAACACCTTTGTCGCGGAACTGAAAGGTAAACAACCGGGTGATGTAGAAGTGCCGGTTATTGGCGGTCACTCTGGCGTTACTATTCTGCCGCTGCTGTCACAGGTTCCTGGCGTCAGTTTTACCGAGCAGGAAGTCGCAGATCTGACCAAACGTATCCAGAACGCGGGT…	ATAACGCGCGTGAGAAAGCGCGTGGCGCGAAAGCGATCGGCACCACGGGGCGTGGTATCGGGCCTGCTTATGAAGATAAAGTGGCACGTCGCGGTCTGCGTGTTGGCGACCTTTTCGACAAAGAAACCTTCGCTGAAAAACTGAAAGAAGTGATGGAATATCACAACTTCCAGTTGGTTAACTACTACAAAGTTGAAGCGGTTGATTACCAGAAAGTTCTGGATGATGTGATGGCCGTTGCCGACATCCTGACTTCCATGGTGGTTGACGTTTCTGACCTGCTCGATCAGGCGCGTCAGCGTGGCGATTTCGTCATGTTTGAAGGTGCGCAGGGTACGCTTCTGGATATCGACCACGGTACTTATCCGTACGTAACCTCTTCCAACACCACTGCGGGTG…	TGCTCGTAAACTGGGCGTCGATATCGACAACCTGCTGTGTTCCCAGCCGGACACTGGCGAACAGGCGCTGGAAATCTGTGACGCCCTGGCGCGCTCTGGCGCAGTAGATGTTATCGTTGTTGACTCCGTAGCGGCACTGACGCCGAAAGCGGAAATCGAAGGTGAAATCGGCGACTCTCACATGGGCCTTGCGGCACGTATGATGAGCCAGGCGATGCGTAAGCTGGCGGGTAACCTGAAGCAGTCCAACACGCTGCTGATCTTCATCAACCAGATCCGTATGAAAATTGGTGTGATGTTCGGTAACCCGGAAACCACTACCGGTGGTAACGCGCTGAAATTCTACGCCTCTGTTCGTCTCGACATCCGTCGTATCGGCGCGGTGAAAGAGGGCGAAAA…
3340	GGGGAAAGGGACTCAGGCTCAGTTCATCATGGAGAAATATGGTATTCCGCAAATCTCCACAGGTGATATGCTGCGTGCTGCGGTCAAATCTGGCTCCGAGCTGGGTAAACAAGCAAAAGACATTATGGACGCTGGCAAACTGGTTACCGATGAACTGGTGATCGCGCTGGTTAAAGAACGTATTGCTCAGGAAGACTGCCGTAACGGTTTCCTGCTTGACGGCTTCCCGCGTACTATTCCGCAGGCTGACGCGATGAAAGAAGCGGGCATCAATGTTGATTACGTTCTGGAGTTCGACGTACCGGACGAACTGATTGTTGATCGTATTGTTGGTCGCCGCGTTCACGCGCCATCTGGCCGTGTTTATCACGTTAAATTCAATCCGCCGAAAGTAGAAGG…	CGAGAGCTATTCGCCAGGCGGCGGATGAAGTGCTGGCAGGGCAACATGATGATGAGTTCCCGCTGGCAATCTGGCAAACGGGATCTGGTACGCAAAGCAATATGAATATGAATGAAGTACTGGCTAACCGGGCCAGCGAATTGCTTGGCGGCGTACGCGGAATGGAACGTAAAGTTCACCCTAACGATGACGTGAACAAAAGCCAAAGCTCCAATGATGTCTTCCCAACTGCTATGCACGTGGCGGCGTTATTGGCACTGCGTAAGCAACTCATTCCTCAGCTCAAAAACCTCACTCAAACTCTGAATGAGAAATCGCGCGCATTTGCCGATATCGTCAAAATTGGTCGTACCCACTTGCAGGACGCCACACCGCTGACTCTGGGACAGGAGATTTCTG…	GGTCTGCACGGCGTTGGTGTTTCGGTAGTAAACGCCCTGTCGCAAAAACTGGAGCTGGTTATTCAGCGCGAGGGTAAAATTCACCGTCAGATCTACGAACACGGTGTTCCGCAGGCACCGCTGGCGGTTACTGGTGACACCGACAAAACCGGCACCATGGTGCGTTTCTGGCCAAGCCTTGAAACTTTCACCAATGTGACCGAGTTCGAATACGATATTCTGGCGAAGCGTCTGCGTGAGCTGTCCTTCCTCAATTCCGGCGTGTCTATTCGTCTGAAAGACAAACGCGACGGCAAAGAAGACCACTTCCACTATGAAGGCGGCATTAAGGCGTTCGTTGAATATCTGAACAAGAACAAAACGCCGATTCACCCGAACATCTTCTACTTCTCCACCGAA…	CGATGCTGCCGTCGAGAAAGCCTATAAAGGTGAGCGTAAAATCTCCTGGATGGAAATTTACACCGGTGAAAAATCCACACAGGTTTATGGTCAGGACGTCTGGCTGCCTGCTGAAACCCTTGATCTGATTCGTGAATATCGCGTTGCTATCAAAGGCCCTCTGACCACTCCGGTTGGCGGCGGTATTCGTTCTCTTAACGTTGCCCTGCGCCAGGAGCTGGATCTTTACATCTGCCTGCGTCCGGTACGTTACTACCAGGGCACTCCAAGCCCGGTTAAACACCCTGAACTGACCGATATGGTTATCTTCCGTGAAAACTCGGAAGACATTTATGCGGGTATCGAATGGAAAGCTGACTCTGCCGACGCAGAGAAAGTGATTAAATTCCTGCGTGAAGA…	GGTGTAGCGCGTAAACCGGGTATGGATCGTTCCGACCTGTTTAACGTTAACGCCGGTATTGTGAAGAATCTGGTTCAGCAAGTTGCGAAAACTTGCCCGAAAGCGTGCATTGGCATTATCACTAACCCGGTTAACACCACTGTGGCTATCGCTGCGGAAGTGCTGAAAAAAGCCGGTGTTTATGACAAAAACAAGCTGTTTGGCGTTACTACGCTGGATATTATTCGTTCCAACACCTTTGTCGCGGAACTGAAAGGTAAACAACCGGGTGATGTAGAAGTGCCGGTTATTGGCGGTCACTCTGGCGTTACTATTCTGCCGCTGCTGTCACAGGTTCCTGGCGTCAGTTTTACCGAGCAGGAAGTCGCAGATCTGACCAAACGTATCCAGAACGCGGGT…	ATAACGCGCGTGAGAAAGCGCGTGGCGCGAAAGCGATCGGCACCACGGGGCGTGGTATCGGGCCTGCTTATGAAGATAAAGTGGCACGTCGCGGTCTGCGTGTTGGCGACCTTTTCGACAAAGAAACCTTCGCTGAAAAACTGAAAGAAGTGATGGAATATCACAACTTCCAGTTGGTTAACTACTACAAAGTTGAAGCGGTTGATTACCAGAAAGTTCTGGATGATGTGATGGCCGTTGCCGACATCCTGACTTCCATGGTGGTTGACGTTTCTGACCTGCTCGATCAGGCGCGTCAGCGTGGCGATTTCGTCATGTTTGAAGGTGCGCAGGGTACGCTTCTGGATATCGACCACGGTACTTATCCGTACGTAACCTCTTCCAACACCACTGCGGGCG…	TGCTCGTAAACTGGGCGTCGATATCGACAACCTGCTGTGTTCCCAGCCGGACACTGGCGAACAGGCGCTGGAAATCTGTGACGCCCTGGCGCGCTCTGGCGCAGTAGATGTTATCGTTGTTGACTCCGTAGCGGCACTGACGCCGAAAGCGGAAATCGAAGGTGAAATCGGCGACTCTCACATGGGCCTTGCGGCACGTATGATGAGCCAGGCGATGCGTAAGCTGGCGGGTAACCTGAAGCAGTCCAACACGCTGCTGATCTTCATCAACCAGATCCGTATGAAAATTGGTGTGATGTTCGGTAACCCGGAAACCACTACCGGTGGTAACGCGCTGAAATTCTACGCCTCTGTTCGTCTCGACATCCGTCGTATCGGCGCGGTGAAAGAGGGCGAAAA…
3358	GGGGAAAGGGACTCAGGCTCAGTTCATCATGGAGAAATATGGTATTCCGCAAATCTCCACAGGTGATATGCTGCGTGCCGCAGTCAAATCTGGCTCCGAGCTGGGTAAACAAGCAAAAGACATTATGGACGCTGGCAAACTGGTTACCGATGAACTGGTGATCGCGCTGGTTAAAGAACGTATTGCTCAGGAAGACTGCCGTAACGGTTTCCTGCTTGACGGCTTCCCGCGTACTATTCCGCAGGCTGACGCGATGAAAGAAGCGGGCATCAATGTTGATTACGTTCTGGAGTTCGACGTACCGGACGAACTGATTGTTGATCGTATTGTTGGTCGTCGCGTTCACGCGCCATCTGGCCGTGTTTATCACGTTAAATTCAATCCGCCGAAAGTAGAAGG…	CGAGAGCCATTCGCCAGGCGGCGGATGAAGTGCTGGCAGGGCAACATGATGATGAGTTCCCGCTGGCAATCTGGCAAACGGGATCTGGTACGCAAAGCAATATGAATATGAATGAAGTACTGGCTAACCGGGCCAGCGAATTGCTTGGCGGCGTACGCGGAATGGAACGTAAAGTTCACCCTAACGATGACGTGAACAAAAGCCAAAGCTCCAATGATGTCTTCCCAACTGCTATGCACGTGGCGGCGTTATTGGCACTGCGTAAGCAACTCATTCCTCAGCTCAAAAACCTCACTCAAACTCTGAATGAGAAATCGCGCGCATTTGCCGATATCGTCAAAATTGGTCGTACCCACTTGCAGGACGCCACACCGCTGACCCTGGGACAGGAGATTTCTG…	GGTCTGCACGGCGTTGGTGTTTCGGTAGTAAACGCCCTGTCGCAAAAACTGGAGCTGGTTATTCAGCGCGAGGGTAAAATTCACCGTCAGATCTACGAACACGGTGTTCCGCAGGCACCGCTGGCGGTTACTGGTGACACCGACAAAACCGGCACCATGGTGCGTTTCTGGCCAAGCCTTGAAACTTTCACCAATGTGACCGAGTTCGAATACGATATTCTGGCGAAGCGTCTGCGTGAGCTGTCCTTCCTCAATTCCGGCGTGTCTATTCGTCTGAAAGACAAACGCGACGGCAAAGAAGACCACTTCCACTATGAAGGCGGCATTAAGGCGTTCGTTGAATATCTGAACAAGAACAAAACGCCGATTCACCCGAACATCTTCTACTTCTCCACCGAA…	CGATGCTGCCGTCGAGAAAGCCTATAAAGGTGAGCGTAAAATCTCCTGGATGGAAATTTACACCGGTGAAAAATCCACACAGGTTTATGGTCAGGACGTCTGGCTGCCTGCTGAAACCCTTGATCTGATTCGTGAATATCGCGTTGCTATCAAAGGCCCTCTGACCACTCCGGTTGGCGGCGGTATTCGTTCTCTTAACGTTGCCCTGCGTCAGGAGCTGGATCTTTACATCTGCCTGCGTCCGGTACGTTACTACCAGGGCACCCCAAGCCCGGTTAAACACCCTGAACTGACCGATATGGTTATCTTCCGTGAAAACTCGGAAGACATTTATGCGGGTATCGAATGGAAAGCTGACTCTGCCGACGCTGAGAAAGTGATCAAATTCCTGCGTGAAGA…	GGTGTAGCGCGTAAACCGGGTATGGATCGTTCCGACCTGTTTAACGTTAACGCCGGTATTGTGAAGAATCTGGTTCAGCAAGTTGCGAAAACTTGCCCGAAAGCGTGCATTGGCATTATCACTAACCCGGTTAACACCACTGTGGCTATCGCTGCGGAAGTGCTGAAAAAAGCCGGTGTTTATGACAAAAACAAGCTGTTTGGCGTTACTACGCTGGATATTATTCGTTCCAACACCTTTGTCGCGGAACTGAAAGGTAAACAACCGGGTGATGTAGAAGTGCCTGTTATTGGCGGTCACTCTGGCGTTACTATTCTGCCGCTGCTGTCACAGGTTCCTGGCGTCAGTTTTACCGAGCAGGAAGTCGCAGATCTGACCAAACGTATCCAGAACGCGGGC…	ATAACGCGCGTGAGAAAGCGCGTGGCGCGAAAGCGATCGGCACCACGGGGCGTGGTATCGGGCCTGCTTATGAAGATAAAGTAGCACGCCGCGGTCTGCGTGTTGGCGACCTTTTCGACAAAGAAACCTTCGCTGAAAAACTGAAAGAAGTGATGGAATATCACAACTTCCAGTTGGTTAACTACTACAAAGTTGAAGCGGTTGATTACCAGAAAGTTCTGGATGATGTGATGGCCGTTGCCGACATCCTGACTTCCATGGTGGTTGACGTTTCTGACCTGCTTGACCAGGCGCGTCAGCGTGGCGATTTCGTCATGTTTGAAGGTGCGCAGGGTACGCTTCTGGATATCGACCACGGTACTTATCCGTACGTAACCTCTTCCAACACCACTGCGGGTG…	TGCTCGTAAACTGGGCGTCGATATTGACAACCTGCTGTGTTCCCAGCCGGACACTGGCGAACAGGCGCTGGAAATCTGTGACGCCCTGGCGCGCTCTGGCGCAGTAGACGTTATCGTTGTTGACTCCGTAGCGGCACTGACGCCGAAAGCGGAAATCGAAGGTGAAATCGGCGACTCTCACATGGGCCTTGCGGCACGTATGATGAGCCAGGCGATGCGTAAGCTGGCGGGTAACCTGAAGCAGTCCAACACGCTGCTGATCTTCATCAACCAGATCCGTATGAAAATTGGTGTGATGTTCGGTAACCCGGAAACCACTACCGGTGGTAACGCGCTGAAATTCTACGCCTCTGTTCGTCTCGACATCCGTCGTATCGGCGCGGTGAAAGAGGGCGAAAA…
3359	GGGGAAAGGGACTCAGGCTCAGTTCATCATGGAGAAATATGGTATTCCGCAAATCTCCACAGGTGATATGCTGCGTGCCGCAGTCAAATCTGGCTCCGAGCTGGGTAAACAAGCAAAAGACATTATGGACGCTGGCAAACTGGTTACCGATGAACTGGTGATCGCGCTGGTTAAAGAACGTATTGCTCAGGAAGACTGCCGTAACGGTTTCCTGCTTGACGGCTTCCCGCGTACTATTCCGCAGGCTGACGCGATGAAAGAAGCGGGCATCAATGTTGATTACGTTCTGGAGTTCGACGTACCGGACGAACTGATTGTTGATCGTATTGTTGGTCGTCGCGTTCACGCGCCATCTGGCCGTGTTTATCACGTTAAATTCAATCCGCCGAAAGTAGAAGG…	CGAGAGCCATTCGCCAGGCGGCGGATGAAGTGCTGGCAGGGCAACATGATGATGAGTTCCCGCTGGCAATCTGGCAAACGGGATCTGGTACGCAAAGCAATATGAATATGAATGAAGTACTGGCTAACCGGGCCAGCGAATTGCTTGGCGGCGTACGCGGAATGGAACGTAAAGTTCACCCTAACGATGACGTGAACAAAAGCCAAAGCTCCAATGATGTCTTCCCAACTGCTATGCACGTGGCGGCGTTATTGGCACTGCGTAAGCAACTCATTCCTCAGCTCAAAAACCTCACTCAAACTCTGAATGAGAAATCGCGCGCATTTGCCGATATCGTCAAAATTGGTCGTACCCACTTGCAGGACGCCACACCGCTGACCCTGGGACAGGAGATTTCTG…	GGTCTGCACGGCGTTGGTGTTTCGGTAGTAAACGCCCTGTCGCAAAAACTGGAGCTGGTTATTCAGCGCGAGGGTAAAATTCACCGTCAGATCTACGAACACGGTGTTCCGCAGGCACCGCTGGCGGTTACTGGTGACACCGACAAAACCGGCACCATGGTGCGTTTCTGGCCAAGCCTTGAAACTTTCACCAATGTGACCGAGTTCGAATACGATATTCTGGCGAAGCGTCTGCGTGAGCTGTCCTTCCTCAATTCCGGCGTGTCTATTCGTCTGAAAGACAAACGCGACGGCAAAGAAGACCACTTCCACTATGAAGGCGGCATTAAGGCGTTCGTTGAATATCTGAACAAGAACAAAACGCCGATTCACCCGAACATCTTCTACTTCTCCACCGAA…	CGATGCTGCCGTCGAGAAAGCCTATAAAGGTGAGCGTAAAATCTCCTGGATGGAAATTTACACCGGTGAAAAATCCACACAGGTTTATGGTCAGGACGTCTGGCTGCCTGCTGAAACCCTTGATCTGATTCGTGAATATCGCGTTGCTATCAAAGGCCCTCTGACCACTCCGGTTGGCGGCGGTATTCGTTCTCTTAACGTTGCCCTGCGTCAGGAGCTGGATCTTTACATCTGCCTGCGTCCGGTACGTTACTACCAGGGCACCCCAAGCCCGGTTAAACACCCTGAACTGACCGATATGGTTATCTTCCGTGAAAACTCGGAAGACATTTATGCGGGTATCGAATGGAAAGCTGACTCTGCCGACGCTGAGAAAGTGATCAAATTCCTGCGTGAAGA…	GGTGTAGCGCGTAAACCGGGTATGGATCGTTCCGACCTGTTTAACGTTAACGCCGGTATTGTGAAGAATCTGGTTCAGCAAGTTGCGAAAACTTGCCCGAAAGCGTGCATTGGCATTATCACTAACCCGGTTAACACCACTGTGGCTATCGCTGCGGAAGTGCTGAAAAAAGCCGGTGTTTATGACAAAAACAAGCTGTTTGGCGTTACTACGCTGGATATTATTCGTTCCAACACCTTTGTCGCGGAACTGAAAGGTAAACAACCGGGTGATGTAGAAGTGCCTGTTATTGGCGGTCACTCTGGCGTTACTATTCTGCCGCTGCTGTCACAGGTTCCTGGCGTCAGTTTTACCGAGCAGGAAGTCGCAGATCTGACCAAACGTATCCAGAACGCGGGC…	ATAACGCGCGTGAGAAAGCGCGTGGCGCGAAAGCGATCGGCACCACGGGGCGTGGTATCGGGCCTGCTTATGAAGATAAAGTAGCACGCCGCGGTCTGCGTGTTGGCGACCTTTTCGACAAAGAAACCTTCGCTGAAAAACTGAAAGAAGTGATGGAATATCACAACTTCCAGTTGGTTAACTACTACAAAGTTGAAGCGGTTGATTACCAGAAAGTTCTGGATGATGTGATGGCCGTTGCCGACATCCTGACTTCCATGGTGGTTGACGTTTCTGACCTGCTTGACCAGGCGCGTCAGCGTGGCGATTTCGTCATGTTTGAAGGTGCGCAGGGTACGCTTCTGGATATCGACCACGGTACTTATCCGTACGTAACCTCTTCCAACACCACTGCGGGTG…	TGCTCGTAAACTGGGCGTCGATATTGACAACCTGCTGTGTTCCCAGCCGGACACTGGCGAACAGGCGCTGGAAATCTGTGACGCCCTGGCGCGCTCTGGCGCAGTAGACGTTATCGTTGTTGACTCCGTAGCGGCACTGACGCCGAAAGCGGAAATCGAAGGTGAAATCGGCGACTCTCACATGGGCCTTGCGGCACGTATGATGAGCCAGGCGATGCGTAAGCTGGCGGGTAACCTGAAGCAGTCCAACACGCTGCTGATCTTCATCAACCAGATCCGTATGAAAATTGGTGTGATGTTCGGTAACCCGGAAACCACTACCGGTGGTAACGCGCTGAAATTCTACGCCTCTGTTCGTCTCGACATCCGTCGTATCGGCGCGGTGAAAGAGGGCGAAAA…
3360	GGGGAAAGGGACTCAGGCTCAGTTCATCATGGAGAAATATGGTATTCCGCAAATCTCCACAGGTGATATGCTGCGTGCCGCAGTCAAATCTGGCTCCGAGCTGGGTAAACAAGCAAAAGACATTATGGACGCTGGCAAACTGGTTACCGATGAACTGGTGATCGCGCTGGTTAAAGAACGTATTGCTCAGGAAGACTGCCGTAACGGTTTCCTGCTTGACGGCTTCCCGCGTACTATTCCGCAGGCTGACGCGATGAAAGAAGCGGGCATCAATGTTGATTACGTTCTGGAGTTCGACGTACCGGACGAACTGATTGTTGATCGTATTGTTGGTCGTCGCGTTCACGCGCCATCTGGCCGTGTTTATCACGTTAAATTCAATCCGCCGAAAGTAGAAGG…	CGAGAGCCATTCGCCAGGCGGCGGATGAAGTGCTGGCAGGGCAACATGATGATGAGTTCCCGCTGGCAATCTGGCAAACGGGATCTGGTACGCAAAGCAATATGAATATGAATGAAGTACTGGCTAACCGGGCCAGCGAATTGCTTGGCGGCGTACGCGGAATGGAACGTAAAGTTCACCCTAACGATGACGTGAACAAAAGCCAAAGCTCCAATGATGTCTTCCCAACTGCTATGCACGTGGCGGCGTTATTGGCACTGCGTAAGCAACTCATTCCTCAGCTCAAAAACCTCACTCAAACTCTGAATGAGAAATCGCGCGCATTTGCCGATATCGTCAAAATTGGTCGTACCCACTTGCAGGACGCCACACCGCTGACCCTGGGACAGGAGATTTCTG…	GGTCTGCACGGCGTTGGTGTTTCGGTAGTAAACGCCCTGTCGCAAAAACTGGAGCTGGTTATTCAGCGCGAGGGTAAAATTCACCGTCAGATCTACGAACACGGTGTTCCGCAGGCACCGCTGGCGGTTACTGGTGACACCGACAAAACCGGCACCATGGTGCGTTTCTGGCCAAGCCTTGAAACTTTCACCAATGTGACCGAGTTCGAATACGATATTCTGGCGAAGCGTCTGCGTGAGCTGTCCTTCCTCAATTCCGGCGTGTCTATTCGTCTGAAAGACAAACGCGACGGCAAAGAAGACCACTTCCACTATGAAGGCGGCATTAAGGCGTTCGTTGAATATCTGAACAAGAACAAAACGCCGATTCACCCGAACATCTTCTACTTCTCCACCGAA…	CGATGCTGCCGTCGAGAAAGCCTATAAAGGTGAGCGTAAAATCTCCTGGATGGAAATTTACACCGGTGAAAAATCCACACAGGTTTATGGTCAGGACGTCTGGCTGCCTGCTGAAACCCTTGATCTGATTCGTGAATATCGCGTTGCTATCAAAGGCCCTCTGACCACTCCGGTTGGCGGCGGTATTCGTTCTCTTAACGTTGCCCTGCGTCAGGAGCTGGATCTTTACATCTGCCTGCGTCCGGTACGTTACTACCAGGGCACCCCAAGCCCGGTTAAACACCCTGAACTGACCGATATGGTTATCTTCCGTGAAAACTCGGAAGACATTTATGCGGGTATCGAATGGAAAGCTGACTCTGCCGACGCTGAGAAAGTGATCAAATTCCTGCGTGAAGA…	GGTGTAGCGCGTAAACCGGGTATGGATCGTTCCGACCTGTTTAACGTTAACGCCGGTATTGTGAAGAATCTGGTTCAGCAAGTTGCGAAAACTTGCCCGAAAGCGTGCATTGGCATTATCACTAACCCGGTTAACACCACTGTGGCTATCGCTGCGGAAGTGCTGAAAAAAGCCGGTGTTTATGACAAAAACAAGCTGTTTGGCGTTACTACGCTGGATATTATTCGTTCCAACACCTTTGTCGCGGAACTGAAAGGTAAACAACCGGGTGATGTAGAAGTGCCTGTTATTGGCGGTCACTCTGGCGTTACTATTCTGCCGCTGCTGTCACAGGTTCCTGGCGTCAGTTTTACCGAGCAGGAAGTCGCAGATCTGACCAAACGTATCCAGAACGCGGGC…	ATAACGCGCGTGAGAAAGCGCGTGGCGCGAAAGCGATCGGCACCACGGGGCGTGGTATCGGGCCTGCTTATGAAGATAAAGTAGCACGCCGCGGTCTGCGTGTTGGCGACCTTTTCGACAAAGAAACCTTCGCTGAAAAACTGAAAGAAGTGATGGAATATCACAACTTCCAGTTGGTTAACTACTACAAAGTTGAAGCGGTTGATTACCAGAAAGTTCTGGATGATGTGATGGCCGTTGCCGACATCCTGACTTCCATGGTGGTTGACGTTTCTGACCTGCTTGACCAGGCGCGTCAGCGTGGCGATTTCGTCATGTTTGAAGGTGCGCAGGGTACGCTTCTGGATATCGACCACGGTACTTATCCGTACGTAACCTCTTCCAACACCACTGCGGGTG…	TGCTCGTAAACTGGGCGTCGATATTGACAACCTGCTGTGTTCCCAGCCGGACACTGGCGAACAGGCGCTGGAAATCTGTGACGCCCTGGCGCGCTCTGGCGCAGTAGACGTTATCGTTGTTGACTCCGTAGCGGCACTGACGCCGAAAGCGGAAATCGAAGGTGAAATCGGCGACTCTCACATGGGCCTTGCGGCACGTATGATGAGCCAGGCGATGCGTAAGCTGGCGGGTAACCTGAAGCAGTCCAACACGCTGCTGATCTTCATCAACCAGATCCGTATGAAAATTGGTGTGATGTTCGGTAACCCGGAAACCACTACCGGTGGTAACGCGCTGAAATTCTACGCCTCTGTTCGTCTCGACATCCGTCGTATCGGCGCGGTGAAAGAGGGCGAAAA…
3361	GGGGAAAGGGACTCAGGCTCAGTTCATCATGGAGAAATATGGTATTCCGCAAATCTCCACAGGTGATATGCTGCGTGCCGCAGTCAAATCTGGCTCCGAGCTGGGTAAACAAGCAAAAGACATTATGGACGCTGGCAAACTGGTTACCGATGAACTGGTGATCGCGCTGGTTAAAGAACGTATTGCTCAGGAAGACTGCCGTAACGGTTTCCTGCTTGACGGCTTCCCGCGTACTATTCCGCAGGCTGACGCGATGAAAGAAGCGGGCATCAATGTTGATTACGTTCTGGAGTTCGACGTACCGGACGAACTGATTGTTGATCGTATTGTTGGTCGTCGCGTTCACGCGCCATCTGGCCGTGTTTATCACGTTAAATTCAATCCGCCGAAAGTAGAAGG…	CGAGAGCCATTCGCCAGGCGGCGGATGAAGTGCTGGCAGGGCAACATGATGATGAGTTCCCGCTGGCAATCTGGCAAACGGGATCTGGTACGCAAAGCAATATGAATATGAATGAAGTACTGGCTAACCGGGCCAGCGAATTGCTTGGCGGCGTACGCGGAATGGAACGTAAAGTTCACCCTAACGATGACGTGAACAAAAGCCAAAGCTCCAATGATGTCTTCCCAACTGCTATGCACGTGGCGGCGTTATTGGCACTGCGTAAGCAACTCATTCCTCAGCTCAAAAACCTCACTCAAACTCTGAATGAGAAATCGCGCGCATTTGCCGATATCGTCAAAATTGGTCGTACCCACTTGCAGGACGCCACACCGCTGACCCTGGGACAGGAGATTTCTG…	GGTCTGCACGGCGTTGGTGTTTCGGTAGTAAACGCCCTGTCGCAAAAACTGGAGCTGGTTATTCAGCGCGAGGGTAAAATTCACCGTCAGATCTACGAACACGGTGTTCCGCAGGCACCGCTGGCGGTTACTGGTGACACCGACAAAACCGGCACCATGGTGCGTTTCTGGCCAAGCCTTGAAACTTTCACCAATGTGACCGAGTTCGAATACGATATTCTGGCGAAGCGTCTGCGTGAGCTGTCCTTCCTCAATTCCGGCGTGTCTATTCGTCTGAAAGACAAACGCGACGGCAAAGAAGACCACTTCCACTATGAAGGCGGCATTAAGGCGTTCGTTGAATATCTGAACAAGAACAAAACGCCGATTCACCCGAACATCTTCTACTTCTCCACCGAA…	CGATGCTGCCGTCGAGAAAGCCTATAAAGGTGAGCGTAAAATCTCCTGGATGGAAATTTACACCGGTGAAAAATCCACACAGGTTTATGGTCAGGACGTCTGGCTGCCTGCTGAAACCCTTGATCTGATTCGTGAATATCGCGTTGCTATCAAAGGCCCTCTGACCACTCCGGTTGGCGGCGGTATTCGTTCTCTTAACGTTGCCCTGCGTCAGGAGCTGGATCTTTACATCTGCCTGCGTCCGGTACGTTACTACCAGGGCACCCCAAGCCCGGTTAAACACCCTGAACTGACCGATATGGTTATCTTCCGTGAAAACTCGGAAGACATTTATGCGGGTATCGAATGGAAAGCTGACTCTGCCGACGCTGAGAAAGTGATCAAATTCCTGCGTGAAGA…	GGTGTAGCGCGTAAACCGGGTATGGATCGTTCCGACCTGTTTAACGTTAACGCCGGTATTGTGAAGAATCTGGTTCAGCAAGTTGCGAAAACTTGCCCGAAAGCGTGCATTGGCATTATCACTAACCCGGTTAACACCACTGTGGCTATCGCTGCGGAAGTGCTGAAAAAAGCCGGTGTTTATGACAAAAACAAGCTGTTTGGCGTTACTACGCTGGATATTATTCGTTCCAACACCTTTGTCGCGGAACTGAAAGGTAAACAACCGGGTGATGTAGAAGTGCCTGTTATTGGCGGTCACTCTGGCGTTACTATTCTGCCGCTGCTGTCACAGGTTCCTGGCGTCAGTTTTACCGAGCAGGAAGTCGCAGATCTGACCAAACGTATCCAGAACGCGGGC…	ATAACGCGCGTGAGAAAGCGCGTGGCGCGAAAGCGATCGGCACCACGGGGCGTGGTATCGGGCCTGCTTATGAAGATAAAGTAGCACGCCGCGGTCTGCGTGTTGGCGACCTTTTCGACAAAGAAACCTTCGCTGAAAAACTGAAAGAAGTGATGGAATATCACAACTTCCAGTTGGTTAACTACTACAAAGTTGAAGCGGTTGATTACCAGAAAGTTCTGGATGATGTGATGGCCGTTGCCGACATCCTGACTTCCATGGTGGTTGACGTTTCTGACCTGCTTGACCAGGCGCGTCAGCGTGGCGATTTCGTCATGTTTGAAGGTGCGCAGGGTACGCTTCTGGATATCGACCACGGTACTTATCCGTACGTAACCTCTTCCAACACCACTGCGGGTG…	TGCTCGTAAACTGGGCGTCGATATTGACAACCTGCTGTGTTCCCAGCCGGACACTGGCGAACAGGCGCTGGAAATCTGTGACGCCCTGGCGCGCTCTGGCGCAGTAGACGTTATCGTTGTTGACTCCGTAGCGGCACTGACGCCGAAAGCGGAAATCGAAGGTGAAATCGGCGACTCTCACATGGGCCTTGCGGCACGTATGATGAGCCAGGCGATGCGTAAGCTGGCGGGTAACCTGAAGCAGTCCAACACGCTGCTGATCTTCATCAACCAGATCCGTATGAAAATTGGTGTGATGTTCGGTAACCCGGAAACCACTACCGGTGGTAACGCGCTGAAATTCTACGCCTCTGTTCGTCTCGACATCCGTCGTATCGGCGCGGTGAAAGAGGGCGAAAA…
3365	GGGGAAAGGGACTCAGGCTCAGTTCATCATGGAGAAATATGGTATTCCGCAAATCTCCACAGGTGATATGCTGCGTGCCGCAGTCAAATCTGGCTCCGAGCTGGGTAAACAAGCAAAAGACATTATGGACGCTGGCAAACTGGTTACCGATGAACTGGTGATCGCGCTGGTTAAAGAACGTATTGCTCAGGAAGACTGCCGTAACGGTTTCCTGCTTGACGGCTTCCCGCGTACTATTCCGCAGGCTGACGCGATGAAAGAAGCGGGCATCAATGTTGATTACGTTCTGGAGTTCGACGTACCGGACGAACTGATTGTTGATCGTATTGTTGGTCGTCGCGTTCACGCGCCATCTGGCCGTGTTTATCACGTTAAATTCAATCCGCCGAAAGTAGAAGG…	CGAGAGCCATTCGCCAGGCGGCGGATGAAGTGCTGGCAGGGCAACATGATGATGAGTTCCCGCTGGCAATCTGGCAAACGGGATCTGGTACGCAAAGCAATATGAATATGAATGAAGTACTGGCTAACCGGGCCAGCGAATTGCTTGGCGGCGTACGCGGAATGGAACGTAAAGTTCACCCTAACGATGACGTGAACAAAAGCCAAAGCTCCAATGATGTCTTCCCAACTGCTATGCACGTGGCGGCGTTATTGGCACTGCGTAAGCAACTCATTCCTCAGCTCAAAAACCTCACTCAAACTCTGAATGAGAAATCGCGCGCATTTGCCGATATCGTCAAAATTGGTCGTACCCACTTGCAGGACGCCACACCGCTGACCCTGGGACAGGAGATTTCTG…	GGTCTGCACGGCGTTGGTGTTTCGGTAGTAAACGCCCTGTCGCAAAAACTGGAGCTGGTTATTCAGCGCGAGGGTAAAATTCACCGTCAGATCTACGAACACGGTGTTCCGCAGGCACCGCTGGCGGTTACTGGTGACACCGACAAAACCGGCACCATGGTGCGTTTCTGGCCAAGCCTTGAAACTTTCACCAATGTGACCGAGTTCGAATACGATATTCTGGCGAAGCGTCTGCGTGAGCTGTCCTTCCTCAATTCCGGCGTGTCTATTCGTCTGAAAGACAAACGCGACGGCAAAGAAGACCACTTCCACTATGAAGGCGGCATTAAGGCGTTCGTTGAATATCTGAACAAGAACAAAACGCCGATTCACCCGAACATCTTCTACTTCTCCACCGAA…	CGATGCTGCCGTCGAGAAAGCCTATAAAGGTGAGCGTAAAATCTCCTGGATGGAAATTTACACCGGTGAAAAATCCACACAGGTTTATGGTCAGGACGTCTGGCTGCCTGCTGAAACCCTTGATCTGATTCGTGAATATCGCGTTGCTATCAAAGGCCCTCTGACCACTCCGGTTGGCGGCGGTATTCGTTCTCTTAACGTTGCCCTGCGTCAGGAGCTGGATCTTTACATCTGCCTGCGTCCGGTACGTTACTACCAGGGCACCCCAAGCCCGGTTAAACACCCTGAACTGACCGATATGGTTATCTTCCGTGAAAACTCGGAAGACATTTATGCGGGTATCGAATGGAAAGCTGACTCTGCCGACGCTGAGAAAGTGATCAAATTCCTGCGTGAAGA…	GGTGTAGCGCGTAAACCGGGTATGGATCGTTCCGACCTGTTTAACGTTAACGCCGGTATTGTGAAGAATCTGGTTCAGCAAGTTGCGAAAACTTGCCCGAAAGCGTGCATTGGCATTATCACTAACCCGGTTAACACCACTGTGGCTATCGCTGCGGAAGTGCTGAAAAAAGCCGGTGTTTATGACAAAAACAAGCTGTTTGGCGTTACTACGCTGGATATTATTCGTTCCAACACCTTTGTCGCGGAACTGAAAGGTAAACAACCGGGTGATGTAGAAGTGCCTGTTATTGGCGGTCACTCTGGCGTTACTATTCTGCCGCTGCTGTCACAGGTTCCTGGCGTCAGTTTTACCGAGCAGGAAGTCGCAGATCTGACCAAACGTATCCAGAACGCGGGC…	ATAACGCGCGTGAGAAAGCGCGTGGCGCGAAAGCGATCGGCACCACGGGGCGTGGTATCGGGCCTGCTTATGAAGATAAAGTAGCACGCCGCGGTCTGCGTGTTGGCGACCTTTTCGACAAAGAAACCTTCGCTGAAAAACTGAAAGAAGTGATGGAATATCACAACTTCCAGTTGGTTAACTACTACAAAGTTGAAGCGGTTGATTACCAGAAAGTTCTGGATGATGTGATGGCCGTTGCCGACATCCTGACTTCCATGGTGGTTGACGTTTCTGACCTGCTTGACCAGGCGCGTCAGCGTGGCGATTTCGTCATGTTTGAAGGTGCGCAGGGTACGCTTCTGGATATCGACCACGGTACTTATCCGTACGTAACCTCTTCCAACACCACTGCGGGTG…	TGCTCGTAAACTGGGCGTCGATATTGACAACCTGCTGTGTTCCCAGCCGGACACTGGCGAACAGGCGCTGGAAATCTGTGACGCCCTGGCGCGCTCTGGCGCAGTAGACGTTATCGTTGTTGACTCCGTAGCGGCACTGACGCCGAAAGCGGAAATCGAAGGTGAAATCGGCGACTCTCACATGGGCCTTGCGGCACGTATGATGAGCCAGGCGATGCGTAAGCTGGCGGGTAACCTGAAGCAGTCCAACACGCTGCTGATCTTCATCAACCAGATCCGTATGAAAATTGGTGTGATGTTCGGTAACCCGGAAACCACTACCGGTGGTAACGCGCTGAAATTCTACGCCTCTGTTCGTCTCGACATCCGTCGTATCGGCGCGGTGAAAGAGGGCGAAAA…
3406	GGGGAAAGGGACTCAGGCTCAGTTCATCATGGAGAAATATGGTATTCCGCAAATCTCCACAGGTGATATGCTGCGTGCCGCAGTCAAATCTGGTTCCGAGCTGGGTAAACAAGCAAAAGACATTATGGACGCTGGCAAACTGGTTACCGATGAACTGGTGATCGCGCTGGTTAAAGAACGTATTGCTCAGGAAGACTGCCGTAACGGTTTCCTGCTTGACGGCTTCCCGCGTACTATTCCGCAGGCTGACGCGATGAAAGAAGCGGGCATCAATGTTGATTACGTTCTGGAGTTCGACGTACCGGACGAACTGATTGTTGATCGTATTGTTGGTCGCCGCGTTCACGCGCCATCTGGCCGTGTTTATCACGTTAAATTCAATCCGCCGAAAGTAGAAGG…	CGAGAGCCATTCGCCAGGCGGCGGATGAAGTGCTGGCAGGGCAACATGATGATGAGTTCCCGCTGGCAATCTGGCAAACGGGATCCGGTACGCAAAGCAATATGAATATGAATGAAGTACTGGCTAATCGGGCCAGCGAATTGCTTGGCGGTGTACGCGGAATGGAACGTAAAGTTCACCCTAACGATGACGTGAACAAAAGCCAAAGCTCCAATGATGTCTTCCCAACTGCTATGCACGTAGCGGCGTTATTGGCACTGCGTAAGCAACTCATTCCTCAGCTCAAAAACCTCACTCAAACTCTGAATGAGAAATCGCGCGCATTTGCCGATATCGTCAAAATTGGACGTACCCACTTGCAGGACGCCACACCGCTGACCCTGGGACAGGAGATTTCTG…	GGTCTGCACGGCGTTGGTGTTTCGGTAGTAAACGCCCTGTCGCAAAAACTGGAGCTGGTTATTCAGCGCGAGGGTAAAATTCACCGTCAGATCTACGAACACGGTGTTCCGCAAGCACCGCTGGCGGTTACTGGTGACACCGACAAAACCGGCACCATGGTGCGTTTCTGGCCAAGCCTTGAAACTTTCACCAATGTGACCGAGTTCGAATACGATATTCTGGCGAAGCGTCTGCGTGAGCTGTCCTTCCTCAACTCCGGCGTGTCTATTCGTCTGAAAGACAAACGCGACGGCAAAGAAGACCACTTCCACTATGAAGGCGGCATTAAGGCGTTCGTTGAATATCTGAACAAGAACAAAACGCCGATTCACCCGAACATCTTCTACTTCTCCACCGAA…	CGACGCTGCAGTCGAGAAAGCCTATAAAGGCGAGCGTAAAATCTCCTGGATGGAAATTTACACCGGTGAAAAATCCACACAGGTTTATGGTCAGGATGTCTGGTTGCCTGCTGAAACCCTTGATCTGATTCGTGAATATCGCGTTGCTATCAAAGGCCCTCTGACCACTCCGGTTGGCGGCGGTATTCGTTCTCTTAACGTTGCCCTGCGCCAGGAGCTGGATCTTTACATCTGCCTGCGTCCGGTACGTTACTACCAGGGCACCCCAAGCCCGGTTAAACACCCTGAACTGACCGATATGGTTATCTTCCGTGAAAACTCGGAAGACATTTATGCGGGTATCGAATGGAAAGCTGACTCTGCCGACGCAGAGAAAGTGATTAAATTCCTGCGTGAAGA…	GGTGTAGCGCGTAAACCGGGTATGGATCGTTCCGACCTGTTTAACGTTAACGCCGGTATTGTGAAGAATCTGGTTCAGCAAGTTGCGAAAACTTGCCCGAAAGCGTGCATTGGCATTATCACTAACCCGGTTAACACCACTGTGGCTATCGCTGCGGAAGTGCTGAAAAAAGCCGGTGTTTATGACAAAAACAAGCTGTTTGGCGTTACTACGCTGGATATTATTCGTTCCAACACCTTTGTCGCGGAACTGAAAGGTAAACAACCGGGTGATGTAGAAGTGCCTGTTATTGGCGGTCACTCTGGCGTTACTATTCTGCCGCTGCTGTCACAGGTTCCTGGCGTCAGTTTTACCGAGCAGGAAGTCGCAGATCTGACCAAACGTATCCAGAACGCGGGC…	ATAACGCGCGTGAGAAAGCGCGTGGCGCGAAAGCGATCGGCACCACGGGGCGTGGTATCGGGCCTGCTTATGAAGATAAAGTGGCACGTCGCGGTCTGCGTGTTGGCGACCTTTTCGACAAAGAAACCTTCGCTGAAAAACTGAAAGAAGTGATGGAATATCACAACTTCCAGTTGGTTAACTACTACAAAGTTGAAGCGGTTGATTACCAGAAAGTTCTGGATGATGTGATGGCCGTTGCCGACATCCTGACTTCCATGGTGGTTGACGTTTCTGACCTGCTTGACCAGGCGCGTCAGCGTGGCGATTTCGTCATGTTTGAAGGTGCGCAGGGTACGCTTCTGGATATCGACCACGGTACTTATCCGTACGTAACCTCTTCCAACACCACTGCGGGTG…	TGCTCGTAAACTGGGCGTCGATATCGACAACCTGCTGTGTTCCCAGCCGGACACTGGCGAACAGGCGCTGGAAATCTGTGACGCCCTGGCGCGCTCTGGCGCAGTAGACGTTATCGTTGTTGACTCCGTAGCGGCACTGACGCCGAAAGCGGAAATCGAAGGTGAAATCGGCGACTCTCACATGGGCCTTGCGGCACGTATGATGAGCCAGGCGATGCGTAAGCTGGCGGGTAACCTGAAGCAGTCCAACACGCTGCTGATCTTCATCAACCAGATCCGTATGAAAATTGGTGTGATGTTCGGTAACCCGGAAACCACTACCGGTGGTAACGCGCTGAAATTCTACGCCTCTGTTCGTCTCGACATCCGTCGTATCGGCGCGGTGAAAGAGGGCGAAAA…
3408	GGGGAAAGGGACTCAGGCTCAGTTCATCATGGAGAAATATGGTATTCCGCAAATCTCCACAGGTGATATGCTGCGTGCCGCAGTCAAATCTGGCTCCGAGCTGGGTAAACAAGCAAAAGACATTATGGACGCTGGCAAACTGGTTACCGATGAACTGGTGATCGCGCTGGTTAAAGAACGTATTGCTCAGGAAGACTGCCGTAACGGTTTCCTGCTTGACGGCTTCCCGCGTACTATTCCGCAGGCTGACGCGATGAAAGAAGCGGGCATCAATGTTGATTACGTTCTGGAGTTCGACGTACCGGACGAACTGATTGTTGATCGTATTGTTGGTCGTCGCGTTCACGCGCCATCTGGCCGTGTTTATCACGTTAAATTCAATCCGCCGAAAGTAGAAGG…	CGAGAGCCATTCGCCAGGCGGCGGATGAAGTGCTGGCAGGGCAACATGATGATGAGTTCCCGCTGGCAATCTGGCAAACGGGATCTGGTACGCAAAGCAATATGAATATGAATGAAGTACTGGCTAACCGGGCCAGCGAATTGCTTGGCGGCGTACGCGGAATGGAACGTAAAGTTCACCCTAACGATGACGTGAACAAAAGCCAAAGCTCCAATGATGTCTTCCCAACTGCTATGCACGTGGCGGCGTTATTGGCACTGCGTAAGCAACTCATTCCTCAGCTCAAAAACCTCACTCAAACTCTGAATGAGAAATCGCGCGCATTTGCCGATATCGTCAAAATTGGTCGTACCCACTTGCAGGACGCCACACCGCTGACCCTGGGACAGGAGATTTCTG…	GGTCTGCACGGCGTTGGTGTTTCGGTAGTAAACGCCCTGTCGCAAAAACTGGAGCTGGTTATTCAGCGCGAGGGTAAAATTCACCGTCAGATCTACGAACACGGTGTTCCGCAGGCACCGCTGGCGGTTACTGGTGACACCGACAAAACCGGCACCATGGTGCGTTTCTGGCCAAGCCTTGAAACTTTCACCAATGTGACCGAGTTCGAATACGATATTCTGGCGAAGCGTCTGCGTGAGCTGTCCTTCCTCAATTCCGGCGTGTCTATTCGTCTGAAAGACAAACGCGACGGCAAAGAAGACCACTTCCACTATGAAGGCGGCATTAAGGCGTTCGTTGAATATCTGAACAAGAACAAAACGCCGATTCACCCGAACATCTTCTACTTCTCCACCGAA…	CGATGCTGCCGTCGAGAAAGCCTATAAAGGTGAGCGTAAAATCTCCTGGATGGAAATTTACACCGGTGAAAAATCCACACAGGTTTATGGTCAGGACGTCTGGCTGCCTGCTGAAACCCTTGATCTGATTCGTGAATATCGCGTTGCTATCAAAGGCCCTCTGACCACTCCGGTTGGCGGCGGTATTCGTTCTCTTAACGTTGCCCTGCGTCAGGAGCTGGATCTTTACATCTGCCTGCGTCCGGTACGTTACTACCAGGGCACCCCAAGCCCGGTTAAACACCCTGAACTGACCGATATGGTTATCTTCCGTGAAAACTCGGAAGACATTTATGCGGGTATCGAATGGAAAGCTGACTCTGCCGACGCTGAGAAAGTGATCAAATTCCTGCGTGAAGA…	GGTGTAGCGCGTAAACCGGGTATGGATCGTTCCGACCTGTTTAACGTTAACGCCGGTATTGTGAAGAATCTGGTTCAGCAAGTTGCGAAAACTTGCCCGAAAGCGTGCATTGGCATTATCACTAACCCGGTTAACACCACTGTGGCTATCGCTGCGGAAGTGCTGAAAAAAGCCGGTGTTTATGACAAAAACAAGCTGTTTGGCGTTACTACGCTGGATATTATTCGTTCCAACACCTTTGTCGCGGAACTGAAAGGTAAACAACCGGGTGATGTAGAAGTGCCTGTTATTGGCGGTCACTCTGGCGTTACTATTCTGCCGCTGCTGTCACAGGTTCCTGGCGTCAGTTTTACCGAGCAGGAAGTCGCAGATCTGACCAAACGTATCCAGAACGCGGGC…	ATAACGCGCGTGAGAAAGCGCGTGGCGCGAAAGCGATCGGCACCACGGGGCGTGGTATCGGGCCTGCTTATGAAGATAAAGTAGCACGCCGCGGTCTGCGTGTTGGCGACCTTTTCGACAAAGAAACCTTCGCTGAAAAACTGAAAGAAGTGATGGAATATCACAACTTCCAGTTGGTTAACTACTACAAAGTTGAAGCGGTTGATTACCAGAAAGTTCTGGATGATGTGATGGCCGTTGCCGACATCCTGACTTCCATGGTGGTTGACGTTTCTGACCTGCTTGACCAGGCGCGTCAGCGTGGCGATTTCGTCATGTTTGAAGGTGCGCAGGGTACGCTTCTGGATATCGACCACGGTACTTATCCGTACGTAACCTCTTCCAACACCACTGCGGGTG…	TGCTCGTAAACTGGGCGTCGATATTGACAACCTGCTGTGTTCCCAGCCGGACACTGGCGAACAGGCGCTGGAAATCTGTGACGCCCTGGCGCGCTCTGGCGCAGTAGACGTTATCGTTGTTGACTCCGTAGCGGCACTGACGCCGAAAGCGGAAATCGAAGGTGAAATCGGCGACTCTCACATGGGCCTTGCGGCACGTATGATGAGCCAGGCGATGCGTAAGCTGGCGGGTAACCTGAAGCAGTCCAACACGCTGCTGATCTTCATCAACCAGATCCGTATGAAAATTGGTGTGATGTTCGGTAACCCGGAAACCACTACCGGTGGTAACGCGCTGAAATTCTACGCCTCTGTTCGTCTCGACATCCGTCGTATCGGCGCGGTGAAAGAGGGCGAAAA…
3427	GGGGAAAGGGACTCAGGCTCAGTTCATCATGGAGAAATATGGTATTCCGCAAATCTCCACAGGTGATATGCTGCGTGCCGCAGTCAAATCTGGCTCCGAGCTGGGTAAACAAGCAAAAGACATTATGGACGCTGGCAAACTGGTTACCGATGAACTGGTGATCGCGCTGGTTAAAGAACGTATTGCTCAGGAAGACTGCCGTAACGGTTTCCTGCTTGACGGCTTCCCGCGTACTATTCCGCAGGCTGACGCGATGAAAGAAGCGGGCATCAATGTTGATTACGTTCTGGAGTTCGACGTACCGGACGAACTGATTGTTGATCGTATTGTTGGTCGCCGCGTTCACGCGCCATCTGGCCGTGTTTATCACGTTAAATTCAATCCGCCGAAAGTAGAAGG…	CGAGAGCCATTCGCCAGGCGGCGGATGAAGTGCTGGCAGGGCAACATGATGATGAGTTCCCGCTGGCAATCTGGCAAACGGGATCTGGTACGCAAAGCAATATGAATATGAATGAAGTACTGGCTAATCGGGCCAGCGAATTGCTTGGCGGCGTACGCGGAATGGAACGTAAAGTTCACCCTAACGATGACGTGAACAAAAGCCAAAGCTCCAATGATGTCTTCCCAACTGCTATGCACGTAGCGGCGTTATTGGCACTGCGTAAGCAACTCATTCCTCAGCTCAAAAACCTCACTCAAACTCTGAATGAGAAATCGCGCGCATTTGCCGATATCGTCAAAATTGGTCGTACCCACTTGCAGGACGCCACACCGCTGACCCTGGGACAGGAGATTTCTG…	GGTCTGCACGGCGTTGGTGTTTCGGTAGTAAACGCCCTGTCGCAAAAACTGGAGCTGGTTATTCAGCGCGAGGGTAAAATTCACCGTCAGATCTACGAACACGGTGTTCCGCAGGCACCGCTGGCGGTTACTGGTGACACCGACAAAACCGGCACCATGGTGCGTTTCTGGCCAAGCCTTGAAACTTTCACCAATGTGACCGAGTTCGAATACGATATTCTGGCGAAGCGTCTGCGTGAGCTGTCCTTCCTCAATTCCGGCGTGTCTATTCGTCTGAAAGACAAACGCGACGGCAAAGAAGACCACTTCCACTATGAAGGCGGCATTAAGGCGTTCGTTGAATATCTGAACAAGAACAAAACGCCGATTCACCCGAACATCTTCTACTTCTCCACCGAA…	CGATGCTGCCGTCGAGAAAGCCTATAAAGGTGAGCGTAAAATCTCCTGGATGGAAATTTACACCGGTGAAAAATCCACACAGGTTTATGGTCAGGACGTCTGGCTGCCTGCTGAAACCCTTGATCTGATTCGTGAATATCGCGTTGCTATCAAAGGCCCTCTGACCACTCCGGTTGGCGGCGGTATTCGTTCTCTTAACGTTGCCCTGCGTCAGGAGCTGGATCTTTACATCTGCCTGCGTCCGGTACGTTACTACCAGGGCACCCCAAGCCCGGTTAAACACCCTGAACTGACCGATATGGTTATCTTCCGTGAAAACTCGGAAGACATTTATGCGGGTATCGAATGGAAAGCTGACTCTGCCGACGCTGAGAAAGTGATCAAATTCCTGCGTGAAGA…	GGTGTAGCGCGTAAACCGGGTATGGATCGTTCCGACCTGTTTAACGTTAACGCCGGTATTGTGAAGAATCTGGTTCAGCAAGTTGCGAAAACTTGCCCGAAAGCGTGCATTGGCATTATCACTAACCCGGTTAACACCACTGTGGCTATCGCTGCGGAAGTGCTGAAAAAAGCCGGTGTTTATGACAAAAACAAGCTGTTTGGCGTTACTACGCTGGATATTATTCGTTCCAACACCTTTGTCGCGGAACTGAAAGGTAAACAACCGGGTGATGTAGAAGTGCCTGTTATTGGCGGTCACTCTGGCGTTACTATTCTGCCGCTGCTGTCACAGGTTCCTGGCGTCAGTTTTACCGAGCAGGAAGTCGCAGATCTGACCAAACGTATCCAGAACGCGGGC…	ATAACGCGCGTGAGAAAGCGCGCGGCGCGAAAGCGATCGGCACCACGGGGCGTGGTATCGGGCCTGCTTATGAAGATAAAGTGGCACGTCGCGGTCTGCGTGTTGGCGACCTTTTCGACAAAGAAACCTTCGCTGAAAAACTGAAAGAAGTGATGGAATATCACAACTTCCAGTTGGTTAACTACTACAAAGTTGAAGCGGTTGATTACCAGAAAGTTCTGGATGATGTGATGGCCGTTGCCGACATCCTGACTTCCATGGTGGTTGACGTTTCTGACCTGCTTGACCAGGCGCGTCAGCGTGGCGATTTCGTCATGTTTGAAGGTGCGCAGGGTACGCTTCTGGATATCGACCACGGTACTTATCCGTACGTAACCTCTTCCAACACCACTGCGGGCG…	TGCTCGTAAACTGGGCGTCGATATTGACAACCTGCTGTGTTCCCAGCCGGACACTGGCGAACAGGCGCTGGAAATCTGTGACGCCCTGGCGCGCTCTGGCGCAGTAGACGTTATCGTTGTTGACTCCGTAGCGGCACTGACGCCGAAAGCGGAAATCGAAGGTGAAATCGGCGACTCTCACATGGGCCTTGCGGCACGTATGATGAGCCAGGCGATGCGTAAGCTGGCGGGTAACCTGAAGCAGTCCAACACGCTGCTGATCTTCATCAACCAGATCCGTATGAAAATTGGTGTGATGTTCGGTAACCCGGAAACCACTACCGGTGGTAACGCGCTGAAATTCTACGCCTCTGTTCGTCTCGACATCCGTCGTATCGGCGCGGTGAAAGAGGGCGAAAA…
3428	GGGGAAAGGGACTCAGGCTCAGTTCATCATGGAGAAATATGGTATTCCGCAAATCTCCACAGGTGATATGCTGCGTGCCGCAGTCAAATCTGGCTCCGAGCTGGGTAAACAAGCAAAAGACATTATGGACGCTGGCAAACTGGTTACCGATGAACTGGTGATCGCACTGGTTAAAGAACGTATTGCTCAGGAAGACTGCCGTAACGGTTTCCTGCTTGACGGCTTCCCGCGTACTATTCCGCAGGCTGACGCGATGAAAGAAGCGGGCATCAATGTTGATTACGTTCTGGAGTTCGACGTACCGGACGAACTGATTGTTGATCGTATTGTTGGTCGCCGCGTTCACGCGCCATCTGGCCGTGTTTATCACGTTAAATTCAATCCGCCGAAAGTAGAAGG…	CGAGAGCCATTCGCCAGGCGGCGGATGAAGTGCTGGCAGGGCAACATGATGATGAGTTCCCGCTGGCAATCTGGCAAACGGGATCTGGTACGCAAAGCAATATGAATATGAATGAAGTACTGGCTAACCGGGCCAGCGAATTGCTTGGCGGCGTACGCGGAATGGAACGTAAAGTTCACCCTAACGATGACGTGAACAAAAGCCAAAGCTCCAATGATGTCTTCCCAACTGCTATGCACGTGGCGGCGTTATTGGCACTGCGTAAGCAACTCATTCCTCAGCTCAAAAACCTCACTCAAACTCTGAATGAGAAATCGCGCGCATTTGCCGATATCGTCAAAATTGGTCGTACCCACTTGCAGGACGCCACACCGCTGACCCTGGGACAGGAGATTTCTG…	GGTCTGCACGGCGTTGGTGTTTCGGTAGTAAACGCCCTGTCGCAAAAACTGGAGCTGGTTATTCAGCGCGAGGGTAAAATTCACCGTCAGATCTACGAACACGGTGTTCCGCAGGCACCGCTGGCGGTTACTGGTGACACCGACAAAACCGGCACCATGGTGCGTTTCTGGCCAAGCCTTGAAACTTTCACCAATGTGACCGAGTTCGAATACGATATTCTGGCGAAGCGTCTGCGTGAGCTGTCCTTCCTCAATTCCGGCGTGTCTATTCGTCTGAAAGACAAACGCGACGGCAAAGAAGACCACTTCCACTATGAAGGCGGCATTAAGGCGTTCGTTGAATATCTGAACAAGAACAAAACGCCGATTCACCCGAACATCTTCTACTTCTCCACCGAA…	CGATGCTGCCGTCGAGAAAGCCTATAAAGGTGAGCGTAAAATCTCCTGGATGGAAATTTACACCGGTGAAAAATCCACACAGGTTTATGGTCAGGACGTCTGGCTGCCTGCTGAAACCCTTGATCTGATTCGTGAATATCGCGTTGCTATCAAAGGCCCTCTGACCACTCCGGTTGGCGGCGGTATTCGTTCTCTTAACGTTGCCCTGCGTCAGGAGCTGGATCTTTACATCTGCCTGCGTCCGGTACGTTACTACCAGGGCACCCCAAGCCCGGTTAAACACCCTGAACTGACCGATATGGTTATCTTCCGTGAAAACTCGGAAGACATTTATGCGGGTATCGAATGGAAAGCTGACTCTGCCGACGCTGAGAAAGTGATCAAATTCCTGCGTGAAGA…	GGTGTAGCGCGTAAACCGGGTATGGATCGTTCCGACCTGTTTAACGTTAACGCCGGTATTGTAAAGAATCTGGTTCAGCAAGTTGCGAAAACTTGCCCGAAAGCGTGCATTGGCATTATCACTAACCCGGTTAACACCACTGTGGCTATCGCTGCGGAAGTGCTGAAAAAAGCCGGTGTTTATGACAAAAACAAGCTGTTTGGCGTTACTACGCTGGATATTATTCGTTCCAACACCTTTGTCGCGGAACTGAAAGGTAAACAACCGGGTGATGTAGAAGTGCCTGTTATTGGCGGTCACTCTGGCGTTACTATTCTGCCGCTGCTGTCACAGGTTCCTGGCGTCAGTTTTACCGAGCAGGAAGTCGCAGATCTGACCAAACGTATCCAGAACGCGGGC…	ATAACGCGCGTGAGAAAGCGCGCGGCGCGAAAGCGATCGGCACCACGGGGCGTGGTATCGGGCCTGCTTATGAAGATAAAGTGGCACGTCGCGGTCTGCGTGTTGGCGACCTTTTCGACAAAGAAACCTTCGCTGAAAAACTGAAAGAAGTGATGGAATATCACAACTTCCAGTTGGTTAACTACTACAAAGTTGAAGCGGTTGATTACCAGAAAGTTCTGGATGATGTGATGGCCGTTGCCGACATCCTGACTTCCATGGTGGTTGACGTTTCTGACCTGCTTGACCAGGCGCGTCAGCGTGGCGATTTCGTCATGTTTGAAGGTGCGCAGGGTACGCTGCTGGATATCGACCACGGTACTTATCCGTACGTAACCTCTTCCAACACCACTGCGGGCG…	TGCTCGTAAACTGGGCGTCGATATCGACAACCTGCTGTGTTCCCAGCCGGACACTGGCGAACAGGCGCTGGAAATCTGTGACGCCCTGGCGCGCTCTGGCGCAGTAGACGTTATCGTTGTTGACTCCGTAGCGGCACTGACGCCGAAAGCGGAAATCGAAGGTGAAATCGGCGACTCTCACATGGGTCTTGCGGCACGTATGATGAGCCAGGCGATGCGTAAGCTGGCGGGTAACCTGAAGCAGTCCAACACGCTGCTGATCTTCATCAACCAGATCCGTATGAAAATTGGTGTGATGTTCGGTAACCCGGAAACCACTACCGGTGGTAACGCGCTGAAATTCTACGCCTCTGTTCGTCTCGACATCCGTCGTATCGGCGCGGTGAAAGAGGGCGAAAA…
3429	GGGGAAAGGGACTCAGGCTCAGTTCATCATGGAGAAATATGGTATTCCGCAAATCTCCACAGGTGATATGCTGCGTGCTGCGGTCAAATCTGGCTCCGAGCTGGGTAAACAAGCAAAAGACATTATGGACGCTGGCAAACTGGTTACCGATGAACTGGTGATCGCGCTGGTTAAAGAACGTATTGCTCAGGAAGACTGCCGTAACGGTTTCCTGCTTGACGGCTTCCCGCGTACTATTCCGCAGGCTGACGCGATGAAAGAAGCGGGCATCAATGTTGATTACGTTCTGGAGTTCGACGTACCGGACGAACTGATTGTTGATCGTATTGTTGGTCGCCGCGTTCACGCGCCATCTGGCCGTGTTTATCACGTTAAATTCAATCCGCCGAAAGTAGAAGG…	CGAGAGCTATTCGCCAGGCGGCGGATGAAGTGCTGGCAGGGCAACATGATGATGAGTTCCCGCTGGCAATCTGGCAAACGGGATCTGGTACGCAAAGCAATATGAATATGAATGAAGTACTGGCTAACCGGGCCAGCGAATTGCTTGGCGGCGTACGCGGAATGGAACGTAAAGTTCACCCTAACGATGACGTGAACAAAAGCCAAAGCTCCAATGATGTCTTCCCAACTGCTATGCACGTGGCGGCGTTATTGGCACTGCGTAAGCAACTCATTCCTCAGCTCAAAAACCTCACTCAAACTCTGAATGAGAAATCGCGCGCATTTGCCGATATCGTCAAAATTGGTCGTACCCACTTGCAGGACGCCACACCGCTGACTCTGGGACAGGAGATTTCTG…	GGTCTGCACGGCGTTGGTGTTTCGGTAGTAAACGCCCTGTCGCAAAAACTGGAGCTGGTTATTCAGCGCGAGGGTAAAATTCACCGTCAGATCTACGAACACGGTGTTCCGCAGGAACCGCTGGCGGTTACTGGTGACACCGACAAAACCGGCACCATGGTGCGTTTCTGGCCAAGCCTTGAAACTTTCACCAATGTGACCGAGTTCGAATACGATATTCTGGCGAAGCGTCTGCGTGAGCTGTCCTTCCTCAATTCCGGCGTGTCTATTCGTCTGAAAGACAAACGCGACGGCAAAGAAGACCACTTCCACTATGAAGGCGGCATTAAGGCGTTCGTTGAATATCTGAACAAGAACAAAACGCCGATTCACCCGAACATCTTCTACTTCTCCACCGAA…	CGACGCTGCCGTCGAGAAAGCCTATAAAGGCGAGCGTAAAATCTCCTGGATGGAAATTTACACCGGTGAAAAATCCACACAGGTTTATGGTCAGGACGTCTGGTTGCCTGCTGAAACCCTTGATCTGATTCGTGAATATCGCGTTGCTATCAAAGGCCCTCTGACCACTCCGGTTGGCGGCGGTATTCGTTCTCTTAACGTTGCCCTGCGCCAGGAGCTGGATCTTTACATCTGCCTGCGTCCGGTACGTTACTACCAGGGCACCCCAAGCCCGGTTAAACACCCTGAACTGACCGATATGGTTATCTTCCGTGAAAACTCGGAAGACATTTATGCGGGTATCGAATGGAAAGCTGACTCTGCCGACGCTGAGAAAGTGATCAAATTCCTGCGTGAAGA…	GGTGTAGCGCGTAAACCGGGTATGGATCGTTCCGACCTGTTTAACGTTAACGCCGGTATTGTGAAGAATCTGGTTCAGCAAGTTGCGAAAACTTGCCCGAAAGCGTGCATTGGCATTATCACTAACCCGGTTAACACCACTGTGGCTATCGCTGCGGAAGTGCTGAAAAAAGCCGGTGTTTATGACAAAAACAAGCTGTTTGGCGTTACTACGCTGGATATTATTCGTTCCAACACCTTTGTCGCGGAACTGAAAGGTAAACAACCGGGTGATGTAGAAGTGCCGGTTATTGGCGGTCACTCTGGCGTTACTATTCTGCCGCTGCTGTCACAGGTTCCTGGCGTCAGTTTTACCGAGCAGGAAGTCGCAGATCTGACCAAACGTATCCAGAACGCGGGT…	ATAACGCGCGTGAGAAAGCGCGTGGCGCGAAAGCGATCGGCACCACGGGGCGTGGTATCGGGCCTGCTTATGAAGATAAAGTGGCACGTCGCGGTCTGCGTGTTGGCGACCTTTTCGACAAAGAAACCTTCGCTGAAAAACTGAAAGAAGTGATGGAATATCACAACTTCCAGTTGGTTAACTACTACAAAGTTGAAGCGGTTGATTACCAGAAAGTTCTGGATGATGTGATGGCCGTTGCCGACATCCTGACTTCCATGGTGGTTGACGTTTCTGACCTGCTCGATCAGGCGCGTCAGCGTGGCGATTTCGTCATGTTTGAAGGTGCGCAGGGTACGCTTCTGGATATCGACCACGGTACTTATCCGTACGTAACCTCTTCCAACACCACTGCGGGCG…	TGCTCGTAAACTGGGCGTCGATATCGACAACCTGCTGTGTTCCCAGCCGGACACTGGCGAACAGGCGCTGGAAATCTGTGACGCCCTGGCGCGCTCTGGCGCAGTAGATGTTATCGTTGTTGACTCCGTAGCGGCACTGACGCCGAAAGCGGAAATCGAAGGTGAAATCGGCGACTCTCACATGGGCCTTGCGGCACGTATGATGAGCCAGGCGATGCGTAAGCTGGCGGGTAACCTGAAGCAGTCCAACACGCTGCTGATCTTCATCAACCAGATCCGTATGAAAATTGGTGTGATGTTCGGTAACCCGGAAACCACTACCGGTGGTAACGCGCTGAAATTCTACGCCTCTGTTCGTCTCGACATCCGTCGTATCGGCGCGGTGAAAGAGGGCGAAAA…
3431	GGGGAAAGGGACTCAGGCTCAGTTCATCATGGAGAAATATGGTATTCCGCAAATCTCCACAGGTGATATGCTGCGTGCCGCAGTCAAATCTGGCTCCGAGCTGGGTAAACAAGCAAAAGACATTATGGACGCTGGCAAACTGGTTACCGATGAACTGGTGATCGCGCTGGTTAAAGAACGTATTGCTCAGGAAGACTGCCGTAACGGTTTCCTGCTTGACGGCTTCCCGCGTACTATTCCGCAGGCTGACGCGATGAAAGAAGCGGGCATCAATGTTGATTACGTTCTGGAGTTCGACGTACCGGACGAACTGATTGTTGATCGTATTGTTGGTCGCCGCGTTCACGCGCCATCTGGCCGTGTTTATCACGTTAAATTCAATCCGCCGAAAGTAGAAGG…	CGAGAGCCATTCGCCAGGCGGCGGATGAAGTGCTGGCAGGACAACATGATGATGAGTTCCCGCTGGCAATCTGGCAAACGGGATCCGGTACGCAAAGCAATATGAATATGAATGAAGTACTGGCTAATCGGGCCAGCGAATTGCTTGGCGGCGTACGCGGAATGGAACGTAAAGTTCACCCTAACGATGACGTGAACAAAAGCCAAAGCTCCAATGATGTCTTCCCAACTGCTATGCACGTAGCGGCGTTATTGGCACTGCGTAAGCAACTCATTCCTCAGCTCAAAAACCTCACTCAAACTCTGAATGAGAAATCGCGCGCATTTGCCGATATCGTCAAAATTGGTCGTACCCACTTGCAGGACGCCACACCGCTGACCCTGGGACAGGAGATTTCTG…	GGTCTGCACGGCGTTGGTGTTTCGGTAGTAAACGCCCTGTCGCAAAAACTGGAGCTGGTTATTCAGCGCGAGGGTAAAATTCACCGTCAGATCTACGAACACGGTGTTCCGCAGGCACCGCTGGCGGTTACTGGTGACACCGACAAAACCGGCACCATGGTGCGTTTCTGGCCAAGCCTTGAAACTTTCACCAATGTGACCGAGTTCGAATACGATATTCTGGCGAAGCGTCTGCGTGAGCTGTCCTTCCTCAATTCCGGCGTGTCTATTCGTCTGAAAGACAAACGCGACGGCAAAGAAGACCACTTCCACTATGAAGGCGGCATTAAGGCGTTCGTTGAATATCTGAACAAGAACAAAACGCCGATTCACCCGAACATCTTCTACTTCTCCACCGAA…	CGATGCTGCCGTCGAGAAAGCCTATAAAGGTGAGCGTAAAATCTCCTGGATGGAAATTTACACCGGTGAAAAATCCACACAGGTTTATGGTCAGGACGTCTGGCTGCCTGCTGAAACCCTTGATCTGATTCGTGAATATCGCGTTGCTATCAAAGGCCCTCTGACCACTCCGGTTGGCGGCGGTATTCGTTCTCTTAACGTTGCCCTGCGCCAGGAGCTGGATCTTTACATCTGCCTGCGTCCGGTACGTTACTACCAGGGCACCCCAAGCCCGGTTAAACACCCTGAACTGACCGATATGGTTATCTTCCGTGAAAACTCGGAAGACATTTATGCGGGTATCGAATGGAAAGCTGACTCTGCCGACGCTGAGAAAGTGATCAAATTCCTGCGTGAAGA…	GGTGTAGCGCGTAAACCGGGTATGGATCGTTCCGACCTGTTTAACGTTAACGCCGGTATTGTAAAGAATCTGGTTCAGCAAGTTGCGAAAACTTGCCCGAAAGCGTGCATTGGCATTATCACTAACCCGGTTAACACCACTGTGGCTATCGCTGCGGAAGTGCTGAAAAAAGCCGGTGTTTATGACAAAAACAAGCTGTTTGGCGTTACTACGCTGGATATTATTCGTTCCAACACCTTTGTCGCGGAACTGAAAGGTAAACAACCGGGTGATGTAGAAGTGCCTGTTATTGGCGGTCACTCTGGCGTTACTATTCTGCCGCTGCTGTCACAGGTTCCTGGCGTCAGTTTTACCGAGCAGGAAGTCGCAGATCTGACCAAACGTATCCAGAACGCGGGT…	ATAACGCGCGTGAGAAAGCACGTGGCGCGAAAGCGATCGGCACCACGGGGCGTGGTATCGGGCCTGCTTATGAAGATAAAGTGGCACGTCGCGGTCTGCGTGTTGGCGACCTTTTCGACAAAGAAACCTTCGCTGAAAAACTGAAAGAAGTGATGGAATATCACAACTTCCAGTTGGTTAACTACTACAAAGTTGAAGCGGTTGATTACCAGAAAGTTCTGGATGATGTGATAGCCGTTGCCGACATCCTGACTTCCATGGTGGTTGACGTTTCTGACCTGCTTGACCAGGCGCGTCAGCGTGGCGATTTCGTCATGTTTGAAGGTGCGCAGGGTACGCTTCTGGATATCGACCACGGTACTTATCCGTACGTAACCTCTTCCAACACCACTGCGGGCG…	TGCTCGTAAACTGGGCGTCGATATTGACAACCTGCTGTGTTCCCAGCCGGACACTGGCGAACAGGCGCTGGAAATCTGTGACGCCCTGGCGCGCTCTGGCGCAGTAGACGTTATCGTTGTTGACTCCGTAGCGGCACTGACGCCGAAAGCGGAAATCGAAGGTGAAATCGGCGACTCTCACATGGGCCTTGCGGCACGTATGATGAGCCAGGCGATGCGTAAGCTGGCGGGTAACCTGAAGCAGTCCAACACGCTGCTGATCTTCATCAACCAGATCCGTATGAAAATTGGTGTGATGTTCGGTAACCCGGAAACCACTACCGGTGGTAACGCGCTGAAATTCTACGCCTCTGTTCGTCTCGACATCCGTCGTATCGGCGCGGTGAAAGAGGGCGAAAA…
3433	GGGGAAAGGGACTCAGGCTCAGTTCATCATGGAGAAATATGGTATTCCTCAAATCTCCACAGGTGATATGCTGCGTGCTGCGGTCAAATCTGGCTCCGAGCTGGGTAAACAAGCAAAAGACATTATGGACGCTGGCAAACTGGTTACCGATGAACTGGTGATCGCGCTGGTTAAAGAACGTATTGCTCAGGAAGACTGCCGTAACGGTTTCCTGCTTGACGGCTTCCCGCGTACTATTCCGCAGGCTGACGCGATGAAAGAAGCGGGCATCAATGTTGATTACGTTCTGGAGTTCGACGTACCGGACGAACTGATTGTTGATCGTATTGTTGGTCGCCGCGTTCACGCGCCATCTGGCCGTGTTTATCACGTTAAATTCAATCCGCCGAAAGTAGAAGG…	CGAGAGCTATTCGCCAGGCGGCGGATGAAGTGCTGGCAGGGCAACATGATGATGAGTTCCCGCTGGCAATCTGGCAAACGGGATCTGGTACGCAAAGCAATATGAATATGAATGAAGTACTGGCTAACCGGGCCAGCGAATTGCTTGGCGGCGTACGCGGAATGGAACGTAAAGTTCACCCTAACGATGACGTGAACAAAAGCCAAAGCTCCAATGATGTCTTCCCAACTGCTATGCACGTGGCGGCGTTATTGGCACTGCGTAAGCAACTCATTCCTCAGCTCAAAAACCTCACTCAAACTCTGAATGAGAAATCGCGCGCATTTGCCGATATCGTCAAAATTGGTCGTACCCACTTGCAGGACGCCACACCGCTGACTCTGGGACAGGAGATTTCTG…	GGTCTGCACGGCGTTGGTGTTTCGGTAGTAAACGCCCTGTCGCAAAAACTGGAGCTGGTTATTCAGCGCGAGGGTAAAATTCACCGTCAGATCTACGAACACGGTGTTCCGCAGGCACCGCTGGCGGTTACTGGTGACACCGACAAAACCGGCACCATGGTGCGTTTCTGGCCAAGCCTTGAAACTTTCACCAATGTGACCGAGTTCGAATACGATATTCTGGCGAAGCGTCTGCGTGAGCTGTCCTTCCTCAATTCCGGCGTGTCTATTCGTCTGAAAGACAAACGCGACGGCAAAGAAGACCACTTCCACTATGAAGGCGGCATTAAGGCGTTCGTTGAATATCTGAACAAGAACAAAACGCCGATTCACCCGAACATCTTCTACTTCTCCACCGAA…	CGACGCTGCCGTCGAGAAAGCCTATAAAGGCGAGCGTAAAATCTCCTGGATGGAAATTTACACCGGTGAAAAATCCACACAGGTTTATGGTCAGGACGTCTGGTTGCCTGCTGAAACCCTTGATCTGATTCGTGAATATCGCGTTGCTATCAAAGGCCCTCTGACCACTCCGGTTGGCGGCGGTATTCGTTCTCTTAACGTTGCCCTGCGCCAGGAGCTGGATCTTTACATCTGCCTGCGTCCGGTACGTTACTACCAGGGCACCCCAAGCCCGGTTAAACACCCTGAACTGACCGATATGGTTATCTTCCGTGAAAACTCGGAAGACATTTATGCGGGTATCGAATGGAAAGCTGACTCTGCCGACGCTGAGAAAGTGATCAAATTCCTGCGTGAAGA…	GGTGTAGCGCGTAAACCGGGTATGGATCGTTCCGACCTGTTTAACGTTAACGCCGGTATTGTGAAGAATCTGGTTCAGCAAGTTGCGAAAACTTGCCCGAAAGCGTGCATTGGCATTATCACTAACCCGGTTAACACCACTGTGGCTATCGCTGCGGAAGTGCTGAAAAAAGCCGGTGTTTATGACAAAAACAAGCTGTTTGGCGTTACTACGCTGGATATTATTCGTTCCAACACCTTTGTCGCGGAACTGAAAGGTAAACAACCGGGTGATGTAGAAGTGCCGGTTATTGGCGGTCACTCTGGCGTTACTATTCTGCCGCTGCTGTCACAGGTTCCTGGCGTCAGTTTTACCGAGCATGAAGTCGCAGATCTGACCAAACGTATCCAGAACGCGGGT…	ATAACGCGCGTGAGAAAGCGCGTGGCGCGAAAGCGATCGGCACCACGGGGCGTGGTATCGGGCCTGCTTATGAAGATAAAGTGGCACGTCGCGGTCTGCGTGTTGGCGACCTTTTCGACAAAGAAACCTTCGCTGAAAAACTGAAAGAAGTGATGGAATATCACAACTTCCAGTTGGTTAACTACTACAAAGTTGAAGCGGTTGATTACCAGAAAGTTCTGGATGATGTGATGGCCGTTGCCGACATCCTGACTTCCATGGTGGTTGACGTTTCTGACCTGCTCGATCAGGCGCGTCAGCGTGGCGATTTTGTCATGTTTGAAGGTGCGCAGGGTACGCTTCTGGATATCGACCACGGTACTTATCCGTACGTAACCTCTTCCAACACCACTGCGGGTG…	TGCTCGTAAACTGGGCGTCGATATCGACAACCTGCTGTGTTCCCAGCCGGACACTGGCGAACAGGCGCTGGAAATCTGTGACGCCCTGGCGCGCTCTGGCGCAGTAGATGTTATCGTTGTTGACTCCGTAGCGGCACTGACGCCGAAAGCGGAAATCGAAGGTGAAATCGGCGACTCTCACATGGGCCTTGCGGCACGTATGATGAGCCAGGCGATGCGTAAGCTGGCGGGTAACCTGAAGCAGTCCAACACGCTGCTGATCTTCATCAACCAGATCCGTATGAAAATTGGTGTGATGTTCGGTAACCCGGAAACCACTACCGGTGGTAACGCGCTGAAATTCTACGCCTCTGTTCGTCTCGACATCCGTCGTATCGGCGCGGTGAAAGAGGGCGAAAA…
3441	GGGGAAAGGGACTCAGGCTCAGTTCATCATGGAGAAATATGGTATTCCGCAAATCTCCACAGGTGATATGCTGCGTGCCGCAGTCAAATCTGGCTCCGAGCTGGGTAAACAAGCAAAAGACATTATGGACGCTGGCAAACTGGTTACCGATGAACTGGTGATCGCGCTGGTTAAAGAACGTATTGCTCAGGAAGACTGCCGTAACGGTTTCCTGCTTGACGGCTTCCCGCGTACTATTCCGCAGGCTGACGCGATGAAAGAAGCGGGCATCAATGTTGATTACGTTCTGGAGTTCGACGTACCGGACGAACTGATTGTTGATCGTATTGTTGGTCGCCGCGTTCACGCGCCATCTGGCCGTGTTTATCACGTTAAATTCAATCCGCCGAAAGTAGAAGG…	CGAGAGCCATTCGCCAGGCGGCGGATGAAGTGCTGGCAGGGCAACATGATGATGAGTTCCCGCTGGCAATCTGGCAAACGGGATCTGGTACGCAAAGCAATATGAATATGAATGAAGTACTGGCTAACCGGGCCAGCGAATTGCTTGGCGGCGTACGCGGAATGGAACGTAAAGTTCACCCCAACGATGACGTGAACAAAAGCCAAAGCTCCAATGATGTCTTCCCAACTGCTATGCACGTGGCGGCGTTATTGGCACTGCGTAAGCAACTCATTCCTCAGCTCAAAAACCTCACTCAAACTCTGAATGAGAAATCGCGTGCATTTGCCGATATCGTCAAAATTGGTCGTACCCACTTGCAGGACGCCACACCGCTGACCCTGGGACAGGAGATTTCTG…	GGTCTGCACGGCGTTGGTGTTTCGGTAGTAAACGCCCTGTCGCAAAAACTGGAGCTGGTTATTCAGCGCGAGGGTAAAATTCACCGTCAGATCTACGAACACGGTGTTCCGCAGGCACCGCTGGCGGTTACTGGTGACACCGACAAAACCGGCACCATGGTGCGTTTCTGGCCAAGCCTTGAAACTTTCACCAATGTGACCGAGTTCGAATATGATATTCTGGCGAAGCGTCTGCGTGAGCTGTCCTTCCTCAACTCCGGCGTGTCTATTCGTCTGAAAGACAAACGCGACGGCAAAGAAGACCACTTCCACTATGAAGGCGGCATTAAGGCGTTCGTTGAATATCTGAACAAGAACAAAACGCCGATTCACCCGAACATCTTCTACTTCTCCACCGAA…	CGACGCTGCCGTCGAGAAAGCCTATAAAGGTGAGCGTAAAATCTCCTGGATGGAAATTTACACCGGTGAAAAATCCACACAGGTTTATGGTCAGGACGTCTGGCTGCCTGCTGAAACCCTTGATCTGATTCGTGAATATCGCGTTGCTATCAAAGGCCCGCTGACCACTCCGGTTGGCGGCGGTATTCGTTCTCTTAACGTTGCCCTGCGCCAGGAGCTGGATCTTTACATCTGCCTGCGTCCGGTACGTTACTACCAGGGCACCCCAAGCCCGGTTAAACACCCTGAACTGACCGATATGGTTATCTTCCGTGAAAACTCGGAAGACATTTATGCGGGTATCGAATGGAAAGCTGACTCTGCCGACGCTGAGAAAGTGATCAAATTCCTGCGTGAAGA…	GGTGTAGCGCGTAAACCGGGTATGGATCGTTCCGACCTGTTTAACGTTAACGCCGGTATTGTGAAGAATCTGGTTCAGCAAGTTGCGAAAACTTGCCCGAAAGCGTGCATTGGCATTATCACTAACCCGGTTAACACCACTGTGGCTATCGCTGCGGAAGTGCTGAAAAAAGCCGGTGTTTATGACAAAAACAAGCTGTTTGGCGTTACTACGCTGGATATTATTCGTTCCAACACCTTTGTCGCGGAACTGAAAGGTAAACTACCGGGTGATGTAGAAGTGCCGGTTATTGGCGGTCACTCTGGCGTTACTATTCTGCCGCTGCTGTCACAGGTTCCTGGCGTCAGTTTTACCGAGCAGGAAGTCGCAGATCTGACCAAACGTATCCAGAACGCGGGC…	ATAACGCGCGTGAGAAAGCGCGCGGCGCGAAAGCGATCGGCACCACGGGGCGTGGTATCGGGCCTGCTTATGAAGATAAAGTGGCACGTCGCGGTCTGCGTGTTGGCGACCTTTTCGACAAAGAAACCTTCGCTGAAAAACTGAAAGAAGTGATGGAATATCACAACTTCCAGTTGGTTAACTACTACAAAGTTGAAGCGGTTGATTACCAGAAAGTTCTGGATGATGTGATGGCCGTTGCCGACATCCTGACTTCCATGGTGGTTGACGTTTCTGACCTGCTTGACCAGGCGCGTCAGCGTGGCGATTTCGTCATGTTTGAAGGTGCGCAGGGTACGCTTCTGGATATCGACCACGGTACTTATCCGTACGTAACCTCTTCCAACACCACTGCGGGCG…	TGCTCGTAAACTGGGCGTCGATATCGACAACCTGCTGTGTTCCCAGCCGGACACTGGCGAACAGGCGCTGGAAATCTGTGACGCCCTGGCGCGCTCTGGCGCAGTAGACGTTATCGTTGTTGACTCCGTAGCGGCACTGACGCCGAAAGCGGAAATCGAAGGTGAAATCGGCGACTCTCACATGGGTCTTGCGGCACGTATGATGAGCCAGGCGATGCGTAAGCTGGCGGGTAACCTGAAGCAGTCCAACACGCTGCTGATCTTCATCAACCAGATCCGTATGAAAATTGGTGTGATGTTCGGTAACCCGGAAACCACTACCGGTGGTAACGCGCTGAAATTCTACGCCTCTGTTCGTCTCGACATCCGTCGTATCGGCGCGGTGAAAGAGGGCGAAAA…
3442	GGGGAAAGGGACTCAGGCTCAGTTCATCATGGAGAAATATGGTATTCCGCAAATCTCCACAGGTGATATGCTGCGTGCTGCGGTCAAATCTGGCTCCGAGCTGGGTAAACAAGCAAAAGACATTATGGACGCTGGCAAACTGGTTACCGATGAACTGGTGATCGCGCTGGTTAAAGAACGTATTGCTCAGGAAGACTGCCGTAACGGTTTCCTGCTTGACGGCTTCCCGCGTACTATTCCGCAGGCTGACGCGATGAAAGAAGCGGGCATCAATGTTGATTACGTTCTGGAGTTCGACGTACCGGACGAACTGATTGTTGATCGTATTGTTGGTCGCCGCGTTCACGCGCCATCTGGCCGTGTTTATCACGTTAAATTCAATCCGCCGAAAGTAGAAGG…	CGAGAGCCATTCGCCAGGCGGCGGATGAAGTGCTGGCAGGACAACATGATGATGAGTTCCCGCTGGCAATCTGGCAAACGGGATCCGGTACGCAAAGCAATATGAATATGAATGAAGTACTGGCTAATCGGGCCAGCGAATTGCTTGGCGGCGTACGCGGAATGGAACGTAAAGTTCACCCTAACGATGACGTGAACAAAAGCCAAAGCTCCAATGATGTCTTCCCAACTGCTATGCACGTAGCGGCGTTATTGGCACTGCGTAAGCAACTCATTCCTCAGCTCAAAAACCTCACTCAAACTCTGAATGAGAAATCGCGTGCATTTGCCGATATCGTCAAAATTGGTCGTACCCACTTGCAGGACGCCACACCGCTGACCCTGGGACAGGAGATTTCTG…	GGTCTGCACGGCGTTGGTGTTTCGGTAGTAAACGCCCTGTCGCAAAAACTGGAGCTGGTTATTCAGCGCGAGGGTAAAATTCACCGTCAGATCTACGAACACGGTGTTCCGCAGGCACCGCTGGCGGTTACTGGTGACACCGACAAAACCGGCACCATGGTGCGTTTCTGGCCAAGCCTTGAAACTTTCACCAATGTGACCGAGTTCGAATACGATATTCTGGCGAAGCGTCTGCGTGAGCTGTCCTTCCTCAATTCCGGCGTGTCTATTCGTCTGAAAGACAAACGCGACGGCAAAGAAGACCACTTCCACTATGAAGGCGGCATTAAGGCGTTCGTTGAATATCTGAACAAGAACAAAACGCCGATTCACCCGAACATCTTCTACTTCTCCACCGAA…	CGACGCTGCCGTCGAGAAAGCCTATAAAGGTGAGCGTAAAATCTCCTGGATGGAAATTTACACCGGTGAAAAATCCACACAGGTTTATGGTCAGGACGTCTGGCTGCCTGCTGAAACCCTTGATCTGATTCGTGAATATCGCGTTGCTATCAAAGGCCCGCTGACCACTCCGGTTGGCGGCGGTATTCGTTCTCTTAACGTTGCCCTGCGCCAGGAGCTGGATCTTTACATCTGCCTGCGTCCGGTACGTTACTACCAGGGCACCCCAAGCCCGGTTAAACACCCTGAACTGACCGATATGGTTATCTTCCGTGAAAACTCGGAAGACATTTATGCGGGTATCGAATGGAAAGCTGACTCTGCCGACGCTGAGAAAGTGATTAAATTCCTGCGTGAAGA…	GGTGTAGCGCGTAAACCGGGTATGGATCGTTCCGACCTGTTTAACGTTAACGCCGGTATTGTGAAGAATCTGGTTCAGCAAGTTGCGAAAACTTGCCCGAAAGCGTGCATTGGCATTATCACTAACCCGGTTAACACCACTGTGGCTATCGCTGCGGAAGTGCTGAAAAAAGCCGGTGTTTATGACAAAAACAAGCTGTTTGGCGTTACTACGCTGGATATTATTCGTTCCAACACCTTTGTCGCGGAACTGAAAGGTAAACAACCGGGTGATGTAGAAGTGCCTGTTATTGGCGGTCACTCTGGCGTTACTATTCTGCCGCTGCTGTCACAGGTTCCTGGCGTCAGTTTTACCGAGCAGGAAGTCGCAGATCTGACCAAACGTATCCAGAACGCGGGC…	ATAACGCGCGTGAGAAAGCGCGTGGCGCGAAAGCGATCGGCACCACGGGGCGTGGTATCGGGCCTGCTTATGAAGATAAAGTGGCACGTCGCGGTCTGCGTGTTGGCGACCTTTTCGACAAAGAAACCTTCGCTGAAAAACTGAAAGAAGTGATGGAATATCACAACTTCCAGTTGGTTAACTACTACAAAGTTGAAGCGGTTGATTACCAGAAAGTTCTGGATGATGTGATGGCCGTTGCCGACATCCTGACTTCCATGGTGGTTGACGTTTCTGACCTGCTCGATCAGGCGCGTCAGCGTGGCGATTTCGTCATGTTTGAAGGTGCGCAGGGTACGCTTCTGGATATCGACCACGGTACTTATCCGTACGTAACCTCTTCCAACACCACTGCGGGTG…	TGCTCGTAAACTGGGCGTCGATATTGACAACCTGCTGTGTTCCCAGCCGGACACTGGCGAACAGGCGCTGGAAATCTGTGACGCCCTGGCGCGCTCTGGCGCAGTAGACGTTATCGTTGTTGACTCCGTAGCGGCACTGACGCCGAAAGCGGAAATCGAAGGTGAAATCGGCGACTCTCACATGGGCCTTGCGGCACGTATGATGAGCCAGGCGATGCGTAAGCTGGCGGGTAACCTGAAGCAGTCCAACACGCTGCTGATCTTCATCAACCAGATCCGTATGAAAATTGGTGTGATGTTCGGTAACCCGGAAACCACTACCGGTGGTAACGCGCTGAAATTCTACGCCTCTGTTCGTCTCGACATCCGTCGTATCGGCGCGGTGAAAGAGGGCGAAAA…
3444	GGGGAAAGGGACTCAGGCTCAGTTCATCATGGAGAAATATGGTATTCCGCAAATCTCCACAGGTGATATGCTGCGTGCTGCGGTCAAATCTGGCTCCGAGCTGGGTAAACAAGCAAAAGACATTATGGACGCTGGCAAACTGGTTACCGATGAACTGGTGATCGCGCTGGTTAAAGAACGTATTGCTCAGGAAGACTGCCGTAACGGTTTCCTGCTTGACGGCTTCCCGCGTACTATTCCGCAGGCTGACGCGATGAAAGAAGCGGGCATCAATGTTGATTACGTTCTGGAGTTCGACGTACCGGACGAACTGATTGTTGATCGTATTGTTGGTCGCCGCGTTCACGCGCCATCTGGCCGTGTTTATCACGTTAAATTCAATCCGCCGAAAGTAGAAGG…	CGAGAGCCATTCGCCAGGCGGCGGATGAAGTGCTGGCAGGGCAACATGATGATGAGTTCCCGCTGGCAATCTGGCAAACGGGATCCGGTACGCAAAGCAATATGAATATGAATGAAGTACTGGCTAATCGGGCCAGCGAATTGCTTGGCGGCGTACGCGGAATGGAACGTAAAGTTCACCCTAACGATGACGTGAACAAAAGCCAAAGCTCCAATGATGTCTTCCCAACTGCTATGCACGTAGCGGCGTTATTGGCACTGCGTAAGCAACTCATTCCTCAGCTCAAAAACCTCACTCAAACTCTGAATGAGAAATCGCGTGCATTTGCCGATATCGTCAAAATTGGTCGTACCCACTTGCAGGACGCCACACCGCTGACCCTGGGACAGGAGATTTCTG…	GGTCTGCACGGCGTTGGTGTTTCGGTAGTAAACGCCCTGTCGCAAAAACTGGAGCTGGTTATTCAGCGCGAGGGTAAAATTCACCGTCAGATCTACGAACACGGTGTTCCGCAGGCACCGCTGGCGGTTACTGGTGACACCGACAAAACCGGCACCATGGTGCGTTTCTGGCCAAGCCTTGAAACTTTCACCAATGTGACCGAGTTCGAATACGATATTCTGGCGAAGCGTCTGCGTGAGCTGTCCTTCCTCAACTCCGGCGTGTCTATTCGTCTGAAAGACAAACGCGACGGCAAAGAAGACCACTTCCACTATGAAGGCGGCATTAAGGCGTTCGTTGAATATCTGAACAAGAACAAAACGCCGATTCACCCGAACATCTTCTACTTCTCCACCGAA…	CGATGCTGCCGTCGAGAAAGCCTATAAAGGTGAGCGTAAAATCTCCTGGATGGAAATTTACACCGGTGAAAAATCCACACAGGTTTATGGTCAGGACGTCTGGCTGCCTGCTGAAACCCTTGATCTGATTCGTGAATATCGCGTTGCTATCAAAGGCCCTCTGACCACTCCGGTTGGCGGCGGTATTCGTTCTCTTAACGTTGCCCTGCGTCAGGAGCTGGATCTTTACATCTGCCTGCGTCCGGTACGTTACTACCAGGGCACCCCAAGCCCGGTTAAACACCCTGAACTGACCGATATGGTTATCTTCCGTGAAAACTCGGAAGACATTTATGCGGGTATCGAATGGAAAGCTGACTCTGCCGACGCAGAGAAAGTGATTAAATTCCTGCGTGAAGA…	GGTGTAGCGCGTAAACCGGGTATGGATCGTTCCGACCTGTTTAACGTTAACGCCGGTATTGTGAAGAATCTGGTTCAGCAAGTTGCGAAAACTTGCCCGAAAGCGTGCATTGGCATTATCACTAACCCGGTTAACACCACTGTGGCTATCGCTGCGGAAGTGCTGAAAAAAGCCGGTGTTTATGACAAAAACAAGCTGTTTGGCGTTACTACGCTGGATATTATTCGTTCCAACACCTTTGTCGCGGAACTGAAAGGTAAACAACCGGGTGATGTAGAAGTGCCTGTTATTGGCGGTCACTCTGGCGTTACTATTCTGCCGCTGCTGTCACAGGTTCCTGGCGTCAGTTTTACCGAGCAGGAAGTCGCAGATCTGACCAAACGTATCCAGAACGCGGGC…	ATAACGCGCGTGAGAAAGCGCGCGGCGCGAAAGCGATCGGCACCACGGGGCGTGGTATCGGGCCTGCTTATGAAGATAAAGTGGCACGTCGCGGTCTGCGTGTTGGCGACCTTTTCGACAAAGAAACCTTCGCTGAAAAACTGAAAGAAGTGATGGAATATCACAACTTCCAGTTGGTTAACTACTACAAAGTTGAAGCGGTTGATTACCAGAAAGTTCTGGATGATGTGATGGCCGTTGCCGACATCCTGACTTCCATGGTGGTTGACGTTTCTGACCTGCTTGACCAGGCGCGTCAGCGTGGCGATTTCGTCATGTTTGAAGGTGCGCAGGGTACGCTTCTGGATATCGACCACGGTACTTATCCGTACGTAACCTCTTCCAACACCACTGCGGGCG…	TGCTCGTAAACTGGGCGTCGATATCGACAACCTGCTGTGTTCCCAGCCGGACACTGGCGAACAGGCGCTGGAAATCTGTGACGCCCTGGCGCGCTCTGGCGCAGTAGACGTTATCGTTGTTGACTCCGTAGCGGCACTGACGCCGAAAGCGGAAATCGAAGGTGAAATCGGCGACTCTCACATGGGTCTTGCGGCACGTATGATGAGCCAGGCGATGCGTAAGCTGGCGGGTAACCTGAAGCAGTCCAACACGCTGTTGATCTTCATCAACCAGATCCGTATGAAAATTGGTGTGATGTTCGGTAACCCGGAAACCACTACCGGTGGTAACGCGCTGAAATTCTACGCCTCTGTTCGTCTCGACATCCGTCGTATCGGCGCGGTGAAAGAGGGCGAAAA…
3448	GGGGAAAGGGACTCAGGCTCAGTTCATCATGGAGAAATATGGTATTCCGCAAATCTCCACAGGTGATATGCTGCGTGCCGCAGTCAAATCTGGCTCCGAGCTGGGTAAACAAGCAAAAGACATTATGGACGCTGGCAAACTGGTTACCGATGAACTGGTGATCGCACTGGTTAAAGAACGTATTGCTCAGGAAGACTGCCGTAACGGTTTCCTGCTTGACGGCTTCCCGCGTACTATTCCGCAGGCTGACGCGATGAAAGAAGCGGGCATCAATGTTGATTACGTTCTGGAGTTCGACGTACCGGACGAACTGATTGTTGATCGTATTGTTGGTCGCCGCGTTCACGCGCCATCTGGCCGTGTTTATCACGTTAAATTCAATCCGCCGAAAGTAGAAGG…	CGAGAGCCATTCGCCAGGCGGCGGATGAAGTGCTGGCAGGGCAACATGATGATGAGTTCCCGCTGGCAATCTGGCAAACGGGATCTGGTACGCAAAGCAATATGAATATGAATGAAGTACTGGCTAACCGGGCCAGCGAATTGCTTGGCGGCGTACGCGGAATGGAACGTAAAGTTCACCCTAACGATGACGTGAACAAAAGCCAAAGCTCCAATGATGTCTTCCCAACTGCTATGCACGTGGCGGCGTTATTGGCACTGCGTAAGCAACTCATTCCTCAGCTCAAAAACCTCACTCAAACTCTGAATGAGAAATCGCGCGCATTTGCCTATATCGTCAAAATTGGTCGTACCCACTTGCAGGACGCCACACCGCTGACCCTGGGACAGGAGATTTCTG…	GGTCTGCACGGCGTTGGTGTTTCGGTAGTAAACGCCCTGTCGCAAAAACTGGAGCTGGTTATTCAGCGCGAGGGTAAAATTCACCGTCAGATCTACGAACACGGTGTTCCGCAGGCACCGCTGGCGGTTACTGGTGACACCGACAAAACCGGCACCATGGTGCGTTTCTGGCCAAGCCTTGAAACTTTCACCAATGTGACCGAGTTCGAATACGATATTCTGGCGAAGCGTCTGCGTGAGCTGTCCTTCCTCAATTCCGGCGTGTCTATTCGTCTGAAAGACAAACGCGACGGCAAAGAAGACCACTTCCACTATGAAGGCGGCATTAAGGCGTTCGTTGAATATCTGAACAAGAACAAAACGCCGATTCACCCGAACATCTTCTACTTCTCCACCGAA…	CGATGCTGCCGTCGAGAAAGCCTATAAAGGTGAGCGTAAAATCTCCTGGATGGAAATTTACACCGGTGAAAAATCCACACAGGTTTATGGTCAGGACGTCTGGCTGCCTGCTGAAACCCTTGATCTGATTCGTGAATATCGCGTTGCTATCAAAGGCCCTCTGACCACTCCGGTTGGCGGCGGTATTCGTTCTCTTAACGTTGCCCTGCGTCAGGAGCTGGATCTTTACATCTGCCTGCGTCCGGTACGTTACTACCAGGGCACCCCAAGCCCGGTTAAACACCCTGAACTGACCGATATGGTTATCTTCCGTGAAAACTCGGAAGACATTTATGCGGGTATCGAATGGAAAGCTGACTCTGCCGACGCTGAGAAAGTGATCAAATTCCTGCGTGAAGA…	GGTGTAGCGCGTAAACCGGGTATGGATCGTTCCGACCTGTTTAACGTTAACGCCGGTATTGTAAAGAATCTGGTTCAGCAAGTTGCGAAAACTTGCCCGAAAGCGTGCATTGGCATTATCACTAACCCGGTTAACACCACTGTGGCTATCGCTGCGGAAGTGCTGAAAAAAGCCGGTGTTTATGACAAAAACAAGCTGTTTGGCGTTACTACGCTGGATATTATTCGTTCCAACACCTTTGTCGCGGAACTGAAAGGTAAACAACCGGGTGATGTAGAAGTGCCTGTTATTGGCGGTCACTCTGGCGTTACTATTCTGCCGCTGCTGTCACAGGTTCCTGGCGTCAGTTTTACCGAGCAGGAAGTCGCAGATCTGACCAAACGTATCCAGAACGCGGGC…	ATAACGCGCGTGAGAAAGCGCGCGGCGCGAAAGCGATCGGCACCACGGGGCGTGGTATCGGGCCTGCTTATGAAGATAAAGTGGCACGTCGCGGTCTGCGTGTTGGCGACCTTTTCGACAAAGAAACCTTCGCTGAAAAACTGAAAGAAGTGATGGAATATCACAACTTCCAGTTGGTTAACTACTACAAAGTTGAAGCGGTTGATTACCAGAAAGTTCTGGATGATGTGATGGCCGTTGCCGACATCCTGACTTCCATGGTGGTTGACGTTTCTGACCTGCTTGACCAGGCGCGTCAGCGTGGCGATTTCGTCATGTTTGAAGGTGCGCAGGGTACGCTTCTGGATATCGACCACGGTACTTATCCGTACGTAACCTCTTCCAACACCACTGCGGGCG…	TGCTCGTAAACTGGGCGTCGATATCGACAACCTGCTGTGTTCCCAGCCGGACACTGGCGAACAGGCGCTGGAAATCTGTGACGCCCTGGCGCGCTCTGGCGCAGTAGACGTTATCGTTGTTGACTCCGTAGCGGCACTGACGCCGAAAGCGGAAATCGAAGGTGAAATCGGCGACTCTCACATGGGTCTTGCGGCACGTATGATGAGCCAGGCGATGCGTAAGCTGGCGGGTAACCTGAAGCAGTCCAACACGCTGCTGATCTTCATCAACCAGATCCGTATGAAAATTGGTGTGATGTTCGGTAACCCGGAAACCACTACCGGTGGTAACGCGCTGAAATTCTACGCCTCTGTTCGTCTCGACATCCGTCGTATCGGCGCGGTGAAAGAGGGCGAAAA…
3452	GGGGAAAGGGACTCAGGCTCAGTTCATCATGGAGAAATATGGTATTCCGCAAATCTCCACAGGTGATATGCTGCGTGCCGCAGTCAAATCTGGCTCCGAGCTGGGTAAACAAGCAAAAGACATTATGGACGCTGGCAAACTGGTTACCGATGAACTGGTGATCGCGCTGGTTAAAGAACGTATTGCTCAGGAAGACTGCCGTAACGGTTTCCTGCTTGACGGCTTCCCGCGTACTATTCCGCAGGCTGACGCGATGAAAGAAGCGGGCATCAATGTTGATTACGTTCTGGAGTTCGACGTACCGGACGAACTGATTGTTGATCGTATTGTTGGTCGCCGCGTTCACGCGCCATCTGGCCGTGTTTATCACGTTAAATTCAATCCGCCGAAAGTAGAAGG…	CGAGAGCCATTCGCCAGGCGGCGGATGAAGTGCTGGCAGGGCAACATGATGATGAGTTCCCGCTGGCAATCTGGCAAACGGGATCCGGTACGCAAAGCAATATGAATATGAATGAAGTACTGGCTAATCGGGCCAGCGAATTGCTTGGCGGCGTACGCGGAATGGAACGTAAAGTTCACCCTAACGATGACGTGAACAAAAGCCAAAGCTCCAATGATGTCTTCCCAACTGCTATGCACGTGGCGGCGTTATTGGCACTGCGTAAGCAACTCATTCCTCAGCTCAAAAACCTCACTCAAACTCTGAATGAGAAATCGCGCGCATTTGCCGATATCGTCAAAATTGGTCGTACCCACTTGCAGGACGCCACACCGCTGACCCTGGGACAGGAGATTTCTG…	GGTCTGCACGGCGTTGGTGTTTCGGTAGTAAACGCCCTGTCGCAAAAACTGGAGCTGGTTATTCAGCGCGAGGGTAAAATTCACCGTCAGATCTACGAACACGGTGTTCCGCAGGCACCGCTGGCGGTTACTGGTGACACCGACAAAACCGGCACCATGGTGCGTTTCTGGCCAAGCCTTGAAACTTTCACCAATGTGACCGAGTTCGAATACGATATTCTGGCGAAGCGTCTGCGTGAGCTGTCCTTCCTCAATTCCGGCGTGTCTATTCGTCTGAAAGACAAACGCGACGGCAAAGAAGACCACTTCCACTATGAAGGCGGCATTAAGGCGTTCGTTGAATATCTGAACAAGAACAAAACGCCGATTCACCCGAACATCTTCTACTTCTCCACCGAA…	CGACGCTGCCGTCGAGAAAGCCTATAAAGGCGAGCGTAAAATCTCCTGGATGGAAATTTACACCGGTGAAAAATCCACACAGGTTTATGGTCAGGACGTCTGGCTGCCTGCTGAAACCCTTGATCTGATTCGTGAATATCGCGTTGCTATCAAAGGCCCTCTGACCACTCCGGTTGGCGGCGGTATTCGTTCTCTTAACGTTGCCCTGCGTCAGGAGCTGGATCTTTACATCTGCCTGCGTCCGGTACGTTACTACCAGGGCACCCCAAGCCCGGTTAAACACCCTGAACTGACCGATATGGTTATCTTCCGTGAAAACTCGGAAGACATTTATGCGGGTATCGAATGGAAAGCTGACTCTGCCGACGCTGAGAAAGTGATCAAATTCCTGCGTGAAGA…	GGTGTAGCGCGTAAACCGGGTATGGATCGTTCCGACCTGTTTAACGTTAACGCCGGTATTGTGAAGAATCTGGTTCAGCAAGTTGCGAAAACTTGCCCGAAAGCGTGCATTGGCATTATCACTAACCCGGTTAACACCACTGTGGCTATCGCTGCGGAAGTGCTGAAAAAAGCCGGTGTTTATGACAAAAACAAGCTGTTTGGCGTTACTACGCTGGATATTATTCGTTCCAACACCTTTGTCGCGGAACTGAAAGGTAAACAACCGGGTGATGTAGAAGTGCCGGTTATTGGCGGTCACTCTGGCGTTACTATTCTGCCGCTGCTGTCACAGGTTCCTGGCATCAGTTTTACCGAGCAGGAAGTCGCAGATCTGACCAAACGTATCCAGAACGCGGGC…	ATAACGCGCGTGAGAAAGCGCGTGGCGCGAAAGCGATCGGCACCACGGGGCGTGGTATCGGGCCTGCTTATGAAGATAAAGTGGCACGTCGCGGTCTGCGTGTTGGCGACCTTTTCGACAAAGAAACCTTCGCTGAAAAACTGAAAGAAGTGATGGAATATCACAACTTCCAGTTGGTTAACTACTACAAAGTTGAAGCGGTTGATTACCAGAAAGTTCTGGATGATGTGATGGCCGTTGCCGACATCCTGACTTCCATGGTGGTTGACGTTTCTGACCTGCTTGACCAGGCGCGTCAGCGTGGCGATTTCGTCATGTTTGAAGGTGCGCAGGGTACGCTTCTGGATATCGACCACGGTACTTATCCGTACGTAACCTCTTCCAACACCACTGCGGGTG…	TGCTCGTAAACTGGGCGTCGATATCGACAACCTGCTGTGTTCCCAGCCGGACACTGGCGAACAGGCGCTGGAAATCTGTGACGCCCTGGCGCGCTCTGGCGCAGTAGACGTTATCGTTGTTGACTCCGTAGCGGCACTGACGCCGAAAGCGGAAATCGAAGGTGAAATCGGCGACTCTCACATGGGCCTTGCGGCACGTATGATGAGCCAGGCGATGCGTAAGCTGGCGGGTAACCTGAAGCAGTCCAACACGCTGCTGATCTTCATCAACCAGATCCGTATGAAAATTGGTGTGATGTTCGGTAACCCGGAAACCACTACCGGTGGTAACGCGCTGAAATTCTACGCCTCTGTTCGTCTCGACATCCGTCGTATCGGCGCGGTGAAAGAGGGCGAAAA…
3458	GGGGAAAGGGACTCAGGCTCAGTTCATCATGGAGAAATATGGTATTCCGCAAATCTCCACAGGTGATATGCTGCGTGCTGCGGTCAAATCTGGCTCCGAGCTGGGTAAACAAGCAAAAGACATTATGGACGCTGGCAAACTGGTTACCGATGAACTGGTGATCGCGCTGGTTAAAGAACGTATTGCTCAGGAAGACTGCCGTAACGGTTTCCTGCTTGACGGCTTCCCGCGTACTATTCCGCAGGCTGACGCGATGAAAGAAGCGGGCATCAATGTTGATTACGTTCTGGAGTTCGACGTACCGGACGAACTGATTGTTGATCGTATTGTTGGTCGCCGCGTTCACGCGCCATCTGGCCGTGTTTATCACGTTAAATTCAATCCGCCGAAAGTAGAAGG…	CGAGAGCTATTCGCCAGGCGGCGGATGAAGTGCTGGCAGGGCAACATGATGATGAGTTCCCGCTGGCAATCTGGCAAACGGGATCTGGTACGCAAAGCAATATGAATATGAATGAAGTACTGGCTAACCGGGCCAGCGAATTGCTTGGCGGCGTACGCGGAATGGAACGTAAAGTTCACCCTAACGATGACGTGAACAAAAGCCAAAGCTCCAATGATGTCTTCCCAACTGCTATGCACGTGGCGGCGTTATTGGCACTGCGTAAGCAACTCATTCCTCAGCTCAAAAACCTCACTCAAACTCTGAATGAGAAATCGCGCGCATTTGCCGATATCGTCAAAATTGGTCGTACCCACTTGCAGGACGCCACACCGCTGACTCTGGGACAGGAGATTTCTG…	GGTCTGCACGGCGTTGGTGTTTCGGTAGTAAACGCCCTGTCGCAAAAACTGGAGCTGGTTATTCAGCGCGAGGGTAAAATTCACCGTCAGATCTACGAACACGGTGTTCCGCAGGCACCGCTGGCGGTTACTGGTGACACCGACAAAACCGGCACCATGGTGCGTTTCTGGCCAAGCCTTGAAACTTTCACCAATGTGACCGAGTTCGAATACGATATTCTGGCGAAGCGTCTGCGTGAGCTGTCCTTCCTCAATTCCGGCGTGTCTATTCGTCTGAAAGACAAACGTGACGGCAAAGAAGACCACTTCCACTATGAAGGCGGCATTAAGGCGTTCGTTGAATATCTGAACAAGAACAAAACGCCGATTCACCCGAACATCTTCTACTTCTCCACCGAA…	CGACGCTGCCGTCGAGAAAGCCTATAAAGGCGAGCGTAAAATCTCCTGGATGGAAATTTACACCGGTGAAAAATCCACACAGGTTTATGGTCAGGACGTCTGGTTGCCTGCTGAAACCCTTGATCTGATTCGTGAATATCGCGTTGCTATCAAAGGCCCTCTGACCACTCCGGTTGGCGGCGGTATTCGTTCTCTTAACGTTGCCCTGCGCCAGGAGCTGGATCTTTACATCTGCCTGCGTCCGGTACGTTACTACCAGGGCACCCCAAGCCCGGTTAAACACCCTGAACTGACCGATATGGTTATCTTCCGTGAAAACTCGGAAGACATTTATGCGGGTATCGAATGGAAAGCTGACTCTGCCGACGCTGAGAAAGTGATCAAATTCCTGCGTGAAGA…	GGTGTAGCGCGTAAACCGGGTATGGATCGTTCCGACCTGTTTAACGTTAACGCCGGTATTGTGAAGAATCTGGTTCAGCAAGTTGCGAAAACTTGCCCGAAAGCGTGCATTGGCATTATCACTAACCCGGTTAACACCACTGTGGCTATCGCTGCGGAAGTGCTGAAAAAAGCCGGTGTTTATGACAAAAACAAGCTGTTTGGCGTTACTACGCTGGATATTATTCGTTCCAACACCTTTGTCGCGGAACTGAAAGGTAAACAACCGGGTGATGTAGAAGTGCCGGTTATTGGCGGTCACTCTGGCGTTACTATTCTGCCGCTGCTGTCACAGGTTCCTGGCGTCAGTTTTACCGAGCAGGAAGTCGCAGATCTGACCAAACGTATCCAGAACGCGGGT…	ATAACGCGCGTGAGAAAGCGCGTGGCGCGAAAGCGATCGGCACCACGGGGCGTGGTATCGGGCCTGCTTATGAAGATAAAGTGGCACGTCGCGGTCTGCGTGTTGGCGACCTTTTCGACAAAGAAACCTTCGCTGAAAAACTGAAAGAAGTGATGGAATATCACAACTTCCAGTTGGTTAACTACTACAAAGTTGAAGCGGTTGATTACCAGAAAGTTCTGGATGATGTGATGGCCGTTGCCGACATCCTGACTTCCATGGTGGTTGACGTTTCTGACCTGCTCGATCAGGCGCGTCAGCGTGGCGATTTCGTCATGTTTGAAGGTGCGCAGGGTACGCTTCTGGATATCGACCACGGTACTTATCCGTACGTAACCTCTTCCAACACCACTGCGGGCG…	TGCTCGTAAACTGGGCGTCGATATCGACAACCTGCTGTGTTCCCAGCCGGACACTGGCGAACAGGCGCTGGAAATCTGTGACGCCCTGGCGCGCTCTGGCGCAGTAGATGTTATCGTTGTTGACTCCGTAGCGGCACTGACGCCGAAAGCGGAAATCGAAGGTGAAATCGGCGACTCTCACATGGGCCTTGCGGCACGTATGATGAGCCAGGCGATGCGTAAGCTGGCGGGTAACCTGAAGCAGTCCAACACGCTGCTGATCTTCATCAACCAGATCCGTATGAAAATTGGTGTGATGTTCGGTAACCCGGAAACCACTACCGGTGGTAACGCGCTGAAATTCTACGCCTCTGTTCGTCTCGACATCCGTCGTATCGGCGCGGTGAAAGAGGGCGAAAA…
3460	GGGGAAAGGGACTCAGGCTCAGTTCATCATGGAGAAATATGGTATTCCGCAAATCTCCACAGGTGATATGCTGCGTGCTGCGGTCAAATCTGGCTCCGAGCTGGGTAAACAAGCAAAAGACATTATGGACGCTGGCAAACTGGTTACCGATGAACTGGTGATCGCGCTGGTTAAAGAACGTATTGCTCAGGAAGACTGCCGTAACGGTTTCCTGCTTGACGGCTTCCCGCGTACTATTCCGCAGGCTGACGCGATGAAAGAAGCGGGCATCAATGTTGATTACGTTCTGGAGTTCGACGTACCGGACGAACTGATTGTTGATCGTATTGTTGGTCGCCGCGTTCACGCGCCATCTGGCCGTGTTTATCACGTTAAATTCAATCCGCCGAAAGTAGAAGG…	CGAGAGCCATTCGCCAGGCGGCGGATGAAGTGCTGGCAGGGCAACATGATGATGAGTTCCCGCTGGCAATCTGGCAAACGGGATCCGGTACGCAAAGCAATATGAATATGAATGAAGTACTGGCTAATCGGGCCAGCGAATTGCTTGGCGGCGTACGCGGAATGGAACGTAAAGTTCACCCTAACGATGACGTGAACAAAAGCCAAAGCTCCAATGATGTCTTCCCAACTGCTATGCACGTAGCGGCGTTATTGGCACTGCGTAAGCAACTCATTCCTCAGCTCAAAAACCTCACTCAAACTCTGAATGAGAAATCGCGCGCATTTGCCGATATCGTCAAAATTGGTCGTACCCACTTGCAGGACGCCACACCGCTGACCCTGGGACAGGAGATTTCTG…	GGTCTGCACGGCGTTGGTGTTTCGGTAGTAAACGCCCTGTCGCAAAAACTGGAGCTGGTTATTCAGCGCGAGGGTAAAATTCACCGTCAGATCTACGAACACGGTGTTCCGCAGGCACCGCTGGCGGTTACTGGTGACACCGACAAAACCGGCACCATGGTGCGTTTCTGGCCAAGCCTTGAAACTTTCACCAATGTGACCGAGTTCGAATACGATATTCTGGCGAAGCGTCTGCGTGAGCTGTCCTTCCTCAACTCCGGCGTGTCTATTCGTCTGAAAGACAAACGCGACGGCAAAGAAGACCACTTCCACTATGAAGGCGGCATTAAGGCGTTCGTTGAATATCTGAACAAGAACAAAACGCCGATTCACCCGAACATCTTCTACTTCTCCACCGAA…	CGATGCTGCCGTCGAGAAAGCCTATAAAGGTGAGCGTAAAATCTCCTGGATGGAAATTTACACCGGTGAAAAATCCACACAGGTTTATGGTCAGGACGTCTGGCTGCCTGCTGAAACCCTTGATCTGATTCGTGAATATCGCGTTGCTATCAAAGGCCCTCTGACCACTCCGGTTGGCGGCGGTATTCGTTCTCTTAACGTTGCCCTGCGTCAGGAGCTGGATCTTTACATCTGCCTGCGTCCGGTACGTTACTACCAGGGCACCCCAAGCCCGGTTAAACACCCTGAACTGACCGATATGGTTATCTTCCGTGAAAACTCGGAAGACATTTATGCGGGTATCGAATGGAAAGCTGACTCTGCCGACGCAGAGAAAGTGATTAAATTCCTGCGTGAAGA…	GGTGTAGCGCGTAAACCGGGTATGGATCGTTCCGACCTGTTTAACGTTAACGCCGGTATTGTGAAGAATCTGGTTCAGCAAGTTGCGAAAACTTGCCCGAAAGCGTGCATTGGCATTATCACTAACCCGGTTAACACCACTGTGGCTATCGCTGCGGAAGTGCTGAAAAAAGCCGGTGTTTATGACAAAAACAAGCTGTTTGGCGTTACTACGCTGGATATTATTCGTTCCAACACCTTTGTCGCGGAACTGAAAGGTAAACAACCGGGTGATGTAGAAGTGCCTGTTATTGGCGGTCACTCTGGCGTTACTATTCTGCCGCTGCTGTCACAGGTTCCTGGCGTCAGTTTTACCGAGCAGGAAGTCGCAGATCTGACCAAACGTATCCAGAACGCGGGC…	ATAACGCGCGTGAGAAAGCGCGCGGCGCGAAAGCGATCGGCACCACGGGGCGTGGTATCGGGCCTGCTTATGAAGATAAAGTGGCACGTCGCGGTCTGCGTGTTGGCGACCTTTTCGACAAAGAAACCTTCGCTGAAAAACTGAAAGAAGTGATGGAATATCACAACTTCCAGTTGGTTAACTACTACAAAGTTGAAGCGGTTGATTACCAGAAAGTTCTGGATGATGTGATGGCCGTTGCCGACATCCTGACTTCCATGGTGGTTGACGTTTCTGACCTGCTTGACCAGGCGCGTCAGCGTGGCGATTTCGTCATGTTTGAAGGTGCGCAGGGTACGCTTCTGGATATCGACCACGGTACTTATCCGTACGTAACCTCTTCCAACACCACTGCGGGCG…	TGCTCGTAAACTGGGCGTCGATATCGACAACCTGCTGTGTTCCCAGCCGGACACTGGCGAACAGGCGCTGGAAATCTGTGACGCCCTGGCGCGCTCTGGCGCAGTAGATGTTATCGTTGTTGACTCCGTAGCGGCACTGACGCCGAAAGCGGAAATCGAAGGTGAAATCGGCGACTCTCACATGGGCCTTGCGGCACGTATGATGAGCCAGGCGATGCGTAAGCTGGCGGGTAACCTGAAGCAGTCCAACACGCTGCTGATCTTCATCAACCAGATCCGTATGAAAATTGGTGTGATGTTCGGTAACCCGGAAACCACTACCGGTGGTAACGCGCTGAAATTCTACGCCTCTGTTCGTCTCGACATCCGTCGTATCGGCGCGGTGAAAGAGGGCGAAAA…
3462	GGGGAAAGGGACTCAGGCTCAGTTCATCATGGAGAAATATGGTATTCCGCAAATCTCCACAGGTGATATGCTGCGTGCTGCGGTCAAATCTGGCTCCGAGCTGGGTAAACAAGCAAAAGACATTATGGACGCTGGCAAACTGGTTACCGATGAACTGGTGATCGCGCTGGTTAAAGAACGTATTGCTCAGGAAGACTGCCGTAACGGTTTCCTGCTTGACGGCTTCCCGCGTACTATTCCGCAGGCTGACGCGATGAAAGAAGCGGGCATCAATGTTGATTACGTTCTGGAGTTCGATGTACCGGACGAACTGATTGTTGATCGTATTGTTGGTCGCCGCGTTCACGCGCCATCTGGCCGTGTTTATCACGTTAAATTCAATCCGCCGAAAGTAGAAGG…	CGAGAGCTATTCGCCAGGCGGCGGATGAAGTGCTGGCAGGGCAACATGATGATGAGTTCCCGCTGGCAATCTGGCAAACGGGATCTGGTACGCAAAGCAATATGAATATTAATGAAGTACTGGCTAACCGGGCCAGCGAATTGCTTGGCGGCGTACGCGGAATGGAACGTAAAGTTCACCCTAACGATGACGTGAACAAAAGCCAAAGCTCCAATGATGTCTTCCCAACTGCTATGCACGTGGCGGCGTTATTGGCACTGCGTAAGCAACTCATTCCTCAGCTCAAAAACCTCACTCAAACTCTGAATGAGAAATCGCGCGCATTTGCCGATATCGTCAAAATTGGTCGTACCCACTTGCAGGACGCCACACCGCTGACTCTGGGACAGGAGATTTCTG…	GGTCTGCACGGCGTTGGTGTTTCGGTAGTAAACGCCCTGTCGCAAAAACTGGAGCTGGTTATTCAGCGCGAGGGTAAAATTCACCGTCAGATCTACGAACACGGTGTTCCGCAGGCACCGCTGGCGGTTACTGGTGACACCGACAAAACCGGCACCATGGTGCGTTTCTGGCCAAGCCTTGAAACTTTCACCAATGTGACCGAGTTCGAATACGATATTCTGGCGAAGCGTCTGCGTGAGCTGTCCTTCCTCAATTCCGGCGTGTCTATTCGTCTGAAAGACAAACGCGACGGCAAAGAAGACCACTTCCACTATGAAGGCGGCATTAAGGCGTTCGTTGAATATCTGAACAAGAACAAAACGCCGATTCACCCGAACATCTTCTACTTCTCCACCGAA…	CGACGCTGCCGTCGAGAAAGCCTATAAAGGCGAGCGTAAAATCTCCTGGATGGAAATTTACACCGGTGAAAAATCCACACAGGTTTATGGTCAGGACGTCTGGTTGCCTGCTGAAACCCTTGATCTGATTCGTGAATATCGCGTTGCTATCAAAGGCCCTCTGACCACTCCGGTTGGCGGCGGTATTCGTTCTCTTAACGTTGCCCTGCGCCAGGAGCTGGATCTTTACATCTGCCTGCGTCCGGTACGTTACTACCAGGGCACCCCAAGCCCGGTTAAACACCCTGAACTGACCGATATGGTTATCTTCCGTGAAAACTCGGAAGACATTTATGCGGGTATCGAATGGAAAGCTGACTCTGCCGACGCTGAGAAAGTGATCAAATTCCTGCGTGAAGA…	GGTGTAGCGCGTAAACCGGGTATGGATCGTTCCGACCTGTTTAACGTTAACGCCGGTATTGTGAAGAATCTGGTTCAGCAAGTTGCGAAAACTTGCCCGAAAGCGTGCATTGGCATTATCACTAACCCGGTTAACACCACTGTGGCTATCGCTGCGGAAGTGCTGAAAAAAGCCGGTGTTTATGACAAAAACAAGCTGTTTGGCGTTACTACGCTGGATATTATTCGTTCCAACACCTTTGTCGCGGAACTGAAAGGTAAACAACCGGGTGATGTAGAAGTGCCGGTTATTGGCGGTCACTCTGGCGTTACTATTCTGCCGCTGCTGTCACAGGTTCCTGGCGTCAGTTTTACCGAGCAGGAAGTCGCAGATCTGACCAAACGTATCCAGAACGCGGGT…	ATAACGCGCGTGAGAAAGCGCGTGGCGCGAAAGCGATCGGCACCACGGGGCGTGGTATCGGGCCTGCTTATGAAGATAAAGTGGCACGTCGCGGTCTGCGTGTTGGCGACCTTTTCGACAAAGAAACCTTCGCTGAAAAACTGAAAGAAGTGATGGAATATCACAACTTCCAGTTGGTTAACTACTACAAAGTTGAAGCGGTTGATTACCAGAAAGTTCTGGATGATGTGATGGCCGTTGCCGACATCCTGACTTCCATGGTGGTTGACGTTTCTGACCTGCTCGATCAGGCGCGTCAGCGTGGCGATTTCGTCATGTTTGAAGGTGCGCAGGGTACGCTTCTGGATATCGACCACGGTACTTATCCGTACGTAACCTCTTCCAACACCACTGCGGGCG…	TGCTCGTAAACTGGGCGTCGATATCGACAACCTGCTGTGTTCCCAGCCGGACACTGGCGAACAGGCGCTGGAAATCTGTGACGCCCTGGCGCGCTCTGGCGCAGTAGATGTTATCGTTGTTGACTCCGTAGCGGCACTGACGCCGAAAGCGGAAATCGAAGGTGAAATCGGCGACTCTCACATGGGCCTTGCGGCACGTATGATGAGCCAGGCGATGCGTAAGCTGGCGGGTAACCTGAAGCAGTCCAACACGCTGCTGATCTTCATCAACCAGATCCGTATGAAAATTGGTGTGATGTTCGGTAACCCGGAAACCACTACCGGTGGTAACGCGCTGAAATTCTACGCCTCTGTTCGTCTCGACATCCGTCGTATCGGCGCGGTGAAAGAGGGCGAAAA…
3463	GGGGAAAGGGACTCAGGCTCAGTTCATCATGGAGAAATATGGTATTCCGCAAATCTCCACAGGTGATATGCTGCGTGCTGCGGTCAAATCTGGCTCCGAGCTGGGTAAACAAGCAAAAGACATTATGGACGCTGGCAAACTGGTTACCGATGAACTGGTGATCGCGCTGGTTAAAGAACGTATTGCTCAGGAAGACTGCCGTAACGGTTTCCTGCTTGACGGCTTCCCGCGTACTATTCCGCAGGCTGACGCGATGAAAGAAGCGGGCATCAATGTTGATTACGTTCTGGAGTTCGACGTACCGGACGAACTGATTGTTGATCGTATTGTTGGTCGCCGCGTTCACGCGCCATCTGGCCGTGTTTATCACGTTAAATTCAATCCGCCGAAAGTAGAAGG…	CGAGAGCCATTCGCCAGGCGGCGGATGAAGTGCTGGCAGGGCAACATGATGATGAGTTCCCGCTGGCAATCTGGCAAACGGGATCCGGTACGCAAAGCAATATGAATATGAATGAAGTACTGGCTAATCGGGCCAGCGAATTGCTTGGCGGCGTACGCGGAATGGAACGTAAAGTTCACCCTAACGATGACGTGAACAAAAGCCAAAGCTCCAATGATGTCTTCCCAACTGCTATGCACGTAGCGGCGTTATTGGCACTGCGTAAGCAACTCATTCCTCAGCTCAAAAACCTCACTCAAACTCTGAATGAGAAATCGCGTGCATTTGCCGATATCGTCAAAATTGGTCGTACCCACTTGCAGGACGCCACACCGCTGACCCTGGGACAGGAGATTTCTG…	GGTCTGCACGGCGTTGGTGTTTCGGTAGTAAACGCCCTGTCGCAAAAACTGGAGCTGGTTATTCAGCGCGAGGGTAAAATTCACCGTCAGATCTACGAACACGGTGTTCCGCAGGCACCGCTGGCGGTTACTGGTGACACCGACAAAACCGGCACCATGGTGCGTTTCTGGCCAAGCCTTGAAACTTTCACCAATGTGACCGAGTTCGAATACGATATTCTGGCGAAGCGTCTGCGTGAGCTGTCCTTCCTCAACTCCGGCGTGTCTATTCGTCTGAAAGACAAACGCGACGGCAAAGAAGACCACTTCCACTATGAAGGCGGCATTAAGGCGTTCGTTGAATATCTGAACAAGAACAAAACGCCGATTCACCCGAACATCTTCTACTTCTCCACCGAA…	CGATGCTGCCGTCGAGAAAGCCTATAAAGGTGAGCGTAAAATCTCCTGGATGGAAATTTACACCGGTGAAAAATCCACACAGGTTTATGGTCAGGACGTCTGGCTGCCTGCTGAAACCCTTGATCTGATTCGTGAATATCGCGTTGCTATCAAAGGCCCTCTGACCACTCCGGTTGGCGGCGGTATTCGTTCTCTTAACGTTGCCCTGCGTCAGGAGCTGGATCTTTACATCTGCCTGCGTCCGGTACGTTACTACCAGGGCACCCCAAGCCCGGTTAAACACCCTGAACTGACCGATATGGTTATCTTCCGTGAAAACTCGGAAGACATTTATGCGGGTATCGAATGGAAAGCTGACTCTGCCGACGCAGAGAAAGTGATTAAATTCCTGCGTGAAGA…	GGTGTAGCGCGTAAACCGGGTATGGATCGTTCCGACCTGTTTAACGTTAACGCCGGTATTGTGAAGAATCTGGTTCAGCAAGTTGCGAAAACTTGCCCGAAAGCGTGCATTGGCATTATCACTAACCCGGTTAACACCACTGTGGCTATCGCTGCGGAAGTGCTGAAAAAAGCCGGTGTTTATGACAAAAACAAGCTGTTTGGCGTTACTACGCTGGATATTATTCGTTCCAACACCTTTGTCGCGGAACTGAAAGGTAAACAACCGGGTGATGTAGAAGTGCCTGTTATTGGCGGTCACTCTGGCGTTACTATTCTGCCGCTGCTGTCACAGGTTCCTGGCGTCAGTTTTACCGAGCAGGAAGTCGCAGATCTGACCAAACGTATCCAGAACGCGGGC…	ATAACGCGCGTGAGAAAGCGCGCGGCGCGAAAGCGATCGGCACCACGGGGCGTGGTATCGGGCCTGCTTATGAAGATAAAGTGGCACGTCGCGGTCTGCGTGTTGGCGACCTTTTCGACAAAGAAACCTTCGCTGAAAAACTGAAAGAAGTGATGGAATATCACAACTTCCAGTTGGTTAACTACTACAAAGTTGAAGCGGTTGATTACCAGAAAGTTCTGGATGATGTGATGGCCGTTGCCGACATCCTGACTTCCATGGTGGTTGACGTTTCTGACCTGCTTGACCAGGCGCGTCAGCGTGGCGATTTCGTCATGTTTGAAGGTGCGCAGGGTACGCTTCTGGATATCGACCACGGTACTTATCCGTACGTAACCTCTTCCAACACCACTGCGGGCG…	TGCTCGTAAACTGGGCGTCGATATCGACAACCTGCTGTGTTCCCAGCCGGACACTGGCGAACAGGCGCTGGAAATCTGTGACGCCCTGGCGCGCTCTGGCGCAGTAGACGTTATCGTTGTTGACTCCGTAGCGGCACTGACGCCGAAAGCGGAAATCGAAGGTGAAATCGGCGACTCTCACATGGGTCTTGCGGCACGTATGATGAGCCAGGCGATGCGTAAGCTGGCGGGTAACCTGAAGCAGTCCAACACGCTGTTGATCTTCATCAACCAGATCCGTATGAAAATTGGTGTGATGTTCGGTAACCCGGAAACCACTACCGGTGGTAACGCGCTGAAATTCTACGCCTCTGTTCGTCTCGACATCCGTCGTATCGGCGCGGTGAAAGAGGGCGAAAA…
3471	GGGGAAAGGGACTCAGGCTCAGTTCATCATGGAGAAATATGGTATTCCGCAAATCTCCACAGGTGATATGCTGCGTGCCGCAGTCAAATCTGGCTCCGAGCTGGGTAAACAAGCAAAAGACATTATGGACGCTGGCAAACTGGTTACCGATGAACTGGTGATCGCGCTGGTTAAAGAACGTATTGCTCAGGAAGACTGCCGTAACGGTTTCCTGCTTGACGGCTTCCCGCGTACTATTCCGCAGGCTGACGCGATGAAAGAAGCGGGCATCAATGTTGATTACGTTCTGGAGTTCGACGTACCGGACGAACTGATTGTTGATCGTATTGTTGGTCGCCGCGTTCACGCGCCATCTGGCCGTGTTTATCACGTTAAATTCAATCCGCCGAAAGTAGAAGG…	CGAGAGCCATTCGCCAGGCGGCGGATGAAGTGCTGGCAGGGCAACATGATGATGAGTTCCCGCTGGCAATCTGGCAAACGGGCTCCGGTACGCAAAGCAATATGAATATGAATGAAGTACTGGCTAATCGGGCCAGCGAATTGCTTGGCGGCGTACGCGGAATGGAACGTAAAGTTCACCCTAACGATGACGTGAACAAAAGCCAAAGCTCCAATGATGTCTTCCCAACTGCTATGCACGTGGCGGCGTTATTGGCACTGCGTAAGCAACTCATTCCTCAGCTCAAAAACCTCACTCAAACTCTGAATGAGAAATCGCGCGCATTTGCTGATATCGTCAAAATTGGTCGTACCCACTTGCAGGACGCCACACCGCTGACCCTGGGACAGGAGATTTCTG…	GGTCTGCACGGCGTTGGTGTTTCGGTAGTAAACGCCCTGTCGCAAAAACTGGAGCTGGTTATTCAGCGCGAGGGTAAAATTCACCGTCAGATCTACGAACACGGTGTTCCGCAGGCACCGCTGGCGGTTACTGGTGACACCGACAAAACCGGCACCATGGTGCGTTTCTGGCCAAGCCTTGAAACTTTCACCAATGTGACCGAGTTCGAATACGATATTCTGGCGAAGCGTCTGCGTGAGCTGTCCTTCCTCAACTCCGGCGTGTCTATTCGTCTGAAAGACAAACGCGACGGCAAAGAAGACCACTTCCACTATGAAGGCGGCATTAAGGCGTTCGTTGAATATCTGAACAAGAACAAAACGCCGATTCACCCGAACATCTTCTACTTCTCCACCGAA…	CGATGCTGCCGTCGAGAAAGCCTATAAAGGTGAGCGTAAAATCTCCTGGATGGAAATTTACACCGGTGAAAAATCCACACAGGTTTATGGTCAGGACGTCTGGCTGCCTGCTGAAACCCTTGATCTGATTCGTGAATATCGCGTTGCTATCAAAGGCCCTCTGACCACTCCGGTTGGCGGCGGTATTCGTTCTCTTAACGTTGCCCTGCGTCAGGAGCTGGATCTTTACATCTGCCTGCGTCCGGTACGTTACTACCAGGGCACCCCAAGCCCGGTTAAACACCCTGAACTGACCGATATGGTTATCTTCCGTGAAAACTCGGAAGACATTTATGCGGGTATCGAATGGAAAGCTGACTCTGCCGACGCTGAGAAAGTGATCAAATTCCTGCGTGAAGA…	GGTGTAGCGCGTAAACCGGGTATGGATCGTTCCGACCTGTTTAACGTTAACGCCGGTATTGTAAAGAATCTGGTTCAGCAAGTTGCGAAAACTTGCCCGAAAGCGTGCATTGGCATTATCACTAACCCGGTTAACACCACTGTGGCTATCGCTGCGGAAGTGCTGAAAAAAGCCGGTGTTTATGACAAAAACAAGCTGTTTGGCGTTACTACGCTGGATATTATTCGTTCCAACACCTTTGTCGCGGAACTGAAAGGTAAACAACCGGGTGATGTAGAAGTGCCTGTTATTGGCGGTCACTCTGGCGTTACTATTCTGCCGCTGCTGTCACAGGTTCCTGGCGTCAGTTTTACCGAGCAGGAAGTCGCAGATCTGACCAAACGTATCCAGAACGCGGGT…	ATAACGCGCGTGAGAAAGCGCGTGGCGCGAAAGCGATCGGCACCACGGGGCGTGGTATCGGGCCTGCTTATGAAGATAAAGTGGCACGTCGCGGTCTGCGTGTTGGCGACCTTTTCGACAAAGAAACCTTCGCTGAAAAACTGAAAGAAGTGATGGAATATCACAACTTCCAGTTGGTTAACTACTACAAAGTTGAAGCGGTTGATTACCAGAAAGTTCTGGATGATGTGATGGCCGTTGCCGACATCCTGACTTCCATGGTGGTTGACGTTTCTGACCTGCTCGATCAGGCGCGTCAGCGTGGCGATTTCGTCATGTTTGAAGGTGCGCAGGGTACGCTTCTGGATATCGACCACGGTACTTATCCGTACGTAACCTCTTCCAACACCACTGCGGGTG…	TGCTCGTAAACTGGGCGTCGATATCGACAACCTGCTGTGTTCCCAGCCGGACACTGGCGAACAGGCGCTGGAAATCTGTGACGCCCTGGCGCGCTCTGGCGCAGTAGATGTTATCGTTGTTGACTCCGTAGCGGCACTGACGCCGAAAGCGGAAATCGAAGGTGAAATCGGCGACTCTCACATGGGCCTTGCGGCACGTATGATGAGCCAGGCGATGCGTAAGCTGGCGGGTAACCTGAAGCAGTCCAACACGCTGCTGATCTTCATCAACCAGATCCGTATGAAAATTGGTGTGATGTTCGGTAACCCGGAAACCACTACCGGTGGTAACGCGCTGAAATTCTACGCCTCTGTTCGTCTCGACATCCGTCGTATCGGCGCGGTGAAAGAGGGCGAAAA…
3475	GGGGAAAGGGACTCAGGCTCAGTTCATCATGGAGAAATATGGTATTCCGCAAATCTCCACAGGTGATATGCTGCGTGCCGCAGTCAAATCTGGCTCCGAGCTGGGTAAACAAGCAAAAGACATTATGGACGCTGGCAAACTGGTTACCGATGAACTGGTGATCGCGCTGGTTAAAGAACGTATTGCTCAGGAAGACTGCCGTAACGGTTTCCTGCTTGACGGCTTCCCGCGTACTATTCCGCAGGCTGACGCGATGAAAGAAGCGGGCATCAATGTTGATTACGTTCTGGAGTTCGACGTACCGGACGAACTGATTGTTGATCGTATTGTTGGTCGCCGCGTTCACGCGCCATCTGGCCGTGTTTATCACGTTAAATTCAATCCGCCGAAAGTAGAAGG…	CGAGAGCCATTCGCCAGGCGGCGGATGAAGTGCTGGCAGGGCAACATGATGATGAGTTCCCGCTGGCAATCTGGCAAACGGGATCCGGTACGCAAAGCAATATGAATATGAATGAAGTACTGGCTAATCGGGCCAGCGAATTGCTTGGCGGCGTACGCGGAATGGAACGTAAAGTTCACCCTAACGATGACGTGAACAAAAGCCAAAGCTCCAATGATGTCTTCCCAACTGCTATGCACGTAGCGGCGTTATTGGCACTGCGTAAGCAACTCATTCCTCAGCTCAAAAACCTCACTCAAACTCTGAATGAGAAATCGCGTGCATTTGCCGATATCGTCAAAATTGGTCGTACCCACTTGCAGGACGCCACACCGCTGACCCTGGGACAGGAGATTTCTG…	GGTCTGCACGGCGTTGGTGTTTCGGTAGTAAACGCCCTGTCGCAAAAACTGGAGCTGGTTATTCAGCGCGAGGGTAAAATTCACCGTCAGATCTACGAACACGGTGTTCCGCAAGCACCGCTGGCGGTTACTGGTGACACCGACAAAACCGGCACCATGGTGCGTTTCTGGCCAAGCCTTGAAACTTTCACCAATGTGACCGAGTTCGAATACGATATTCTGGCGAAGCGTCTGCGTGAGCTGTCCTTCCTCAACTCCGGCGTGTCTATTCGTCTGAAAGACAAACGCGACGGCAAAGAAGACCACTTCCACTATGAAGGCGGCATTAAGGCGTTCGTTGAATATCTGAACAAGAACAAAACGCCGATTCACCCGAACATCTTCTACTTCTCCACCGAA…	CGATGCTGCCGTCGAGAAAGCCTATAAAGGTGAGCGTAAAATCTCCTGGATGGAAATTTACACCGGTGAAAAATCCACACAGGTTTATGGTCAGGACGTCTGGCTGCCTGCTGAAACCCTTGATCTGATTCGTGAATATCGCGTTGCTATCAAAGGCCCTCTGACCACTCCGGTTGGCGGCGGTATTCGTTCTCTTAACGTTGCCCTGCGTCAGGAGCTGGATCTTTACATCTGCCTGCGTCCGGTACGTTACTACCAGGGCACCCCAAGCCCGGTTAAACACCCTGAACTGACCGATATGGTTATCTTCCGTGAAAACTCGGAAGACATTTATGCGGGTATCGAATGGAAAGCTGACTCTGCCGACGCAGAGAAAGTGATTAAATTCCTGCGTGAAGA…	GGTGTAGCGCGTAAACCGGGTATGGATCGTTCCGACCTGTTTAACGTTAACGCCGGTATTGTGAAGAATCTGGTTCAGCAAGTTGCGAAAACTTGCCCGAAAGCGTGCATTGGCATTATCACTAACCCGGTTAACACCACTGTGGCTATCGCTGCGGAAGTGCTGAAAAAAGCCGGTGTTTATGACAAAAACAAGCTGTTTGGCGTTACTACGCTGGATATTATTCGTTCCAACACCTTTGTCGCGGAACTGAAAGGTAAACAACCGGGTGATGTAGAAGTGCCTGTTATTGGCGGTCACTCTGGCGTTACTATTCTGCCGCTGCTGTCACAGGTTCCTGGCGTCAGTTTTACCGAGCAGGAAGTCGCAGATCTGACCAAACGTATCCAGAACGCGGGC…	ATAACGCGCGTGAGAAAGCGCGTGGCGCGAAAGCGATCGGCACCACGGGGCGTGGTATCGGGCCTGCTTATGAAGATAAAGTGGCACGTCGCGGTCTGCGTGTTGGCGACCTTTTCGACAAAGAAACCTTCGCTGAAAAACTGAAAGAAGTGATGGAATATCACAACTTCCAGTTGGTTAACTACTACAAAGTTGAAGCGGTTGATTACCAGAAAGTTCTGGATGATGTGATGGCCGTTGCCGACATCCTGACTTCCATGGTGGTTGACGTTTCTGACCTGCTTGACCAGGCGCGTCAGCGTGGCGATTTCGTCATGTTTGAAGGTGCGCAGGGTACGCTTCTGGATATCGACCACGGTACTTATCCGTACGTAACCTCTTCCAACACCACTGCGGGTG…	TGCTCGTAAACTGGGCGTCGATATTGACAACCTGCTGTGTTCCCAGCCGGACACTGGCGAACAGGCGCTGGAAATCTGTGACGCCCTGGCGCGCTCTGGCGCAGTAGACGTTATCGTTGTTGACTCCGTAGCGGCACTGACGCCGAAAGCGGAAATCGAAGGTGAAATCGGCGACTCTCACATGGGCCTTGCGGCACGTATGATGAGCCAGGCGATGCGTAAGCTGGCGGGTAACCTGAAGCAGTCCAACACGCTGCTGATCTTCATCAACCAGATCCGTATGAAAATTGGTGTGATGTTCGGTAACCCGGAAACCACTACCGGTGGTAACGCGCTGAAATTCTACGCCTCTGTTCGTCTCGACATCCGTCGTATCGGCGCGGTGAAAGAGGGCGAAAA…
3483	GGGGAAAGGGACTCAGGCTCAGTTCATCATGGAGAAATATGGTATTCCGCAAATCTCCACAGGTGATATGCTGCGTGCCGCAGTCAAATCTGGCTCCGAGCTGGGTAAACAAGCAAAAGACATTATGGACGCTGGCAAACTGGTTACCGATGAACTGGTGATCGCACTGGTTAAAGAACGTATTGCTCAGGAAGACTGCCGTAACGGTTTCCTGCTTGACGGCTTCCCGCGTACTATTCCGCAGGCTGACGCGATGAAAGAAGCGGGCATCAATGTTGATTACGTTCTGGAGTTCGACGTACCGGACGAACTGATTGTTGATCGTATTGTTGGTCGCCGCGTTCACGCGCCATCTGGCCGTGTTTATCACGTTAAATTCAATCCGCCGAAAGTAGAAGG…	CGAGAGCCATTCGCCAGGCGGCGGATGAAGTGCTGGCAGGGCAACATGATGATGAGTTCCCGCTGGCAATCTGGCAAACGGGATCTGGTACGCAAAGCAATATGAATATGAATGAAGTACTGGCTAACCGGGCCAGCGAATTGCTTGGCGGCGTACGCGGAATGGAACGTAAAGTTCACCCTAACGATGACGTGAACAAAAGCCAAAGCTCCAATGATGTCTTCCCAACTGCTATGCACGTGGCGGCGTTATTGGCACTGCGTAAGCAACTCATTCCTCAGCTCAAAAACCTCACTCAAACTCTGAATGAGAAATCGCGCGCATTTGCCGATATCGTCAAAATTGGTCGTACCCACTTGCAGGACGCCACACCGCTGACCCTGGGACAGGAGATTTCTG…	GGTCTGCACGGCGTTGGTGTTTCGGTAGTAAACGCCCTGTCGCAAAAACTGGAGCTGGTTATTCAGCGCGAGGGTAAAATTCACCGTCAGATCTACGAACACGGTGTTCCGCAGGCACCGCTGGCGGTTACTGGTGACACCGACAAAACCGGCACCATGGTGCGTTTCTGGCCAAGCCTTGAAACTTTCACCAATGTGACCGAGTTCGAATACGATATTCTGGCGAAGCGTCTGCGTGAGCTGTCCTTCCTCAATTCCGGCGTGTCTATTCGTCTGAAAGACAAACGCGACGGCAAAGAAGACCACTTCCACTATGAAGGCGGCATTAAGGCGTTCGTTGAATATCTGAACAAGAACAAAACGCCGATTCACCCGAACATCTTCTACTTCTCCACCGAA…	CGATGCTGCCGTCGAGAAAGCCTATAAAGGTGAGCGTAAAATCTCCTGGATGGAAATTTACACCGGTGAAAAATCCACACAGGTTTATGGTCAGGACGTCTGGCTGCCTGCTGAAACCCTTGATCTGATTCGTGAATATCGCGTTGCTATCAAAGGCCCTCTGACCACTCCGGTTGGCGGCGGTATTCGTTCTCTTAACGTTGCCCTGCGTCAGGAGCTGGATCTTTACATCTGCCTGCGTCCGGTACGTTACTACCAGGGCACCCCAAGCCCGGTTAAACACCCTGAACTGACCGATATGGTTATCTTCCGTGAAAACTCGGAAGACATTTATGCGGGTATCGAATGGAAAGCTGACTCTGCCGACGCTGAGAAAGTGATCAAATTCCTGCGTGAAGA…	GGTGTAGCGCGTAAACCGGGTATGGATCGTTCCGACCTGTTTAACGTTAACGCCGGTATTGTAAAGAATCTGGTTCAGCAAGTTGCGAAAACTTGCCCGAAAGCGTGCATTGGCATTATCACTAACCCGGTTAACACCACTGTGGCTATCGCTGCGGAAGTGCTGAAAAAAGCCGGTGTTTATGACAAAAACAAGCTGTTTGGCGTTACTACGCTGGATATTATTCGTTCCAACACCTTTGTCGCGGAACTGAAAGGTAAACAACCGGGTGATGTAGAAGTGCCTGTTATTGGCGGTCACTCTGGCGTTACTATTCTGCCGCTGCTGTCACAGGTTCCTGGCGTCAGTTTTACCGAGCAGGAAGTCGCAGATCTGACCAAACGTATCCAGAACGCGGGC…	ATAACGCGCGTGAGAAAGCGCGCGGCGCGAAAGCGATCGGCACCACGGGGCGTGGTATCGGGCCTGCTTATGAAGATAAAGTGGCACGTCGCGGTCTGCGTGTTGGCGACCTTTTCGACAAAGAAACCTTCGCTGAAAAACTGAAAGAAGTGATGGAATATCACAACTTCCAGTTGGTTAACTACTACAAAGTTGAAGCGGTTGATTACCAGAAAGTTCTGGATGATGTGATGGCCGTTGCCGACATCCTGACTTCCATGGTGGTTGACGTTTCTGACCTGCTTGACCAGGCGCGTCAGCGTGGCGATTTCGTCATGTTTGAAGGTGCGCAGGGTACGCTGCTGGATATCGACCACGGTACTTATCCGTACGTAACCTCTTCCAACACCACTGCGGGCG…	TGCTCGTAAACTGGGCGTCGATATCGACAACCTGCTGTGTTCCCAGCCGGACACTGGCGAACAGGCGCTGGAAATCTGTGACGCCCTGGCGCGCTCTGGCGCAGTAGACGTTATCGTTGTTGACTCCGTAGCGGCACTGACGCCGAAAGCGGAAATCGAAGGTGAAATCGGCGACTCTCACATGGGTCTTGCGGCACGTATGATGAGCCAGGCGATGCGTAAGCTGGCGGGTAACCTGAAGCAGTCCAACACGCTGCTGATCTTCATCAACCAGATCCGTATGAAAATTGGTGTGATGTTCGGTAACCCGGAAACCACTACCGGTGGTAACGCGCTGAAATTCTACGCCTCTGTTCGTCTCGACATCCGTCGTATCGGCGCGGTGAAAGAGGGCGAAAA…
2025	GGGGAAAGGGACTCAGGCTCAGTTCATCATGGAGAAATATGGTATTCCGCAAATCTCCACAGGTGATATGCTGCGTGCCGCAGTCAAATCTGGCTCCGAGCTGGGTAAACAAGCAAAAGACATTATGGACGCTGGCAAACTGGTTACCGATGAACTGGTGATCGCGCTGGTTAAAGAACGTATTGCTCAGGAAGACTGCCGTAACGGTTTCCTGCTTGACGGCTTCCCGCGTACTATTCCGCAGGCTGACGCGATGAAAGAAGCGGGCATCAATGTTGATTACGTTCTGGAGTTCGACGTACCGGACGAACTGATTGTTGATCGTATTGTTGGTCGCCGCGTTCACGCGCCATCTGGCCGTGTTTATCACGTTAAATTCAATCCGCCGAAAGTAGAAGG…	CGAGAGCCATTCGCCAGGCGGCGGATGAAGTGCTGGCAGGGCAACATGATGATGAGTTCCCGCTGGCAATCTGGCAAACGGGATCCGGTACGCAAAGCAATATGAATATGAATGAAGTACTGGCTAATCGGGCCAGCGAATTGCTTGGCGGCGTACGCGGAATGGAACGTAAAGTTCACCCTAACGATGACGTGAACAAAAGCCAAAGCTCCAATGATGTCTTCCCAACTGCTATGCACGTAGCGGCGTTATTGGCACTGCGTAAGCAACTCATTCCTCAGCTCAAAAACCTCACTCAAACTCTGAATGAGAAATCGCGCGCATTTGCCGATATCGTCAAAATTGGTCGTACCCACTTGCAGGACGCCACACCGCTGACCCTGGGACAGGAGATTTCTG…	GGTCTGCACGGCGTTGGTGTTTCGGTAGTAAACGCCCTGTCGCAAAAACTGGAGCTGGTTATTCAGCGCGAGGGTAAAATTCACCGTCAGATCTACGAACACGGTGTTCCGCAGGCACCGCTGGCGGTTACTGGTGACACCGACAAAACCGGCACCATGGTGCGTTTCTGGCCAAGCCTTGAAACTTTCACCAATGTGACCGAGTTCGAATACGATATTCTGGCGAAGCGTCTGCGTGAGCTGTCCTTCCTCAATTCCGGCGTGTCTATTCGTCTGAAAGACAAACGCGACGGCAAAGAAGACCACTTCCACTATGAAGGCGGCATTAAGGCGTTCGTTGAATATCTGAACAAGAACAAAACGCCGATTCACCCGAACATCTTCTACTTCTCCACCGAA…	CGATGCTGCCGTCGAGAAAGCCTATAAAGGTGAGCGTAAAATCTCCTGGATGGAAATTTACACCGGTGAAAAATCCACACAGGTTTATGGTCAGGACGTCTGGCTGCCTGCTGAAACCCTTGATCTGATTCGTGAATATCGCGTTGCTATCAAAGGCCCTCTGACCACTCCGGTTGGCGGCGGTATTCGTTCTCTTAACGTTGCCCTGCGTCAGGAGCTGGATCTTTACATCTGCCTGCGTCCGGTACGTTACTACCAGGGCACCCCAAGCCCGGTTAAACACCCTGAACTGACCGATATGGTTATCTTCCGTGAAAACTCGGAAGACATTTATGCGGGTATCGAATGGAAAGCTGACTCTGCCGACGCTGAGAAAGTGATCAAATTCCTGCGTGAAAA…	GGTGTAGCGCGTAAACCGGGTATGGATCGTTCCGACCTGTTTAACGTTAACGCCGGTATTGTGAAGAATCTGGTTCAGCAAGTTGCGAAAACTTGCCCGAAAGCGTGCATTGGCATTATCACTAACCCGGTTAACACCACTGTGGCTATCGCTGCGGAAGTGCTGAAAAAAGCCGGTGTTTATGACAAAAACAAGCTGTTTGGCGTTACTACGCTGGATATTATTCGTTCCAACACCTTTGTCGCGGAACTGAAAGGTAAACAACCGGGTGATGTAGAAGTGCCTGTTATTGGCGGTCACTCTGGCGTTACTATTCTGCCGCTGCTGTCACAGGTTCCTGGCGTCAGTTTTACCGAGCAGGAAGTCGCAGATCTGACCAAACGTATCCAGAACGCGGGC…	ATAACGCGCGTGAGAAAGCGCGCGGCGCGAAAGCGATCGGCACCACGGGGCGTGGTATCGGGCCTGCTTATGAAGATAAAGTGGCACGTCGCGGTCTGCGTGTTGGCGACCTTTTCGACAAAGAAACCTTCGCTGAAAAACTGAAAGAAGTGATGGAATATCACAACTTCCAGTTGGTTAACTACTACAAAGTTGAAGCGGTTGATTACCAGAAAGTTCTGGATGATGTGATGGCCGTTGCCGACATCCTGACTTCCATGGTGGTTGACGTTTCTGACCTGCTTGACCAGGCGCGTCAGCGTGGCGATTTCGTCATGTTTGAAGGTGCGCAGGGTACGCTTCTGGATATCGACCACGGTACTTATCCGTACGTAACCTCTTCCAACACCACTGCGGGCG…	TGCTCGTAAACTGGGCGTCGATATTGACAACCTGCTGTGTTCCCAGCCGGACACTGGCGAACAGGCGCTGGAAATCTGTGACGCCCTGGCGCGCTCTGGCGCAGTAGACGTTATCGTTGTTGACTCCGTAGCGGCACTGACGCCGAAAGCGGAAATCGAAGGTGAAATCGGCGACTCTCACATGGGCCTTGCGGCACGTATGATGAGCCAGGCGATGCGTAAGCTGGCGGGTAACCTGAAGCAGTCCAACACGCTGCTGATCTTCATCAACCAGATCCGTATGAAAATTGGTGTGATGTTCGGTAACCCGGAAACCACTACCGGTGGTAACGCGCTGAAATTCTACGCCTCTGTTCGTCTCGACATCCGTCGTATCGGCGCGGTGAAAGAGGGCGAAAA…
2250	GGGGAAAGGGACTCAGGCTCAGTTCATCATGGAGAAATATGGTATTCCGCAAATCTCCACAGGTGATATGCTGCGTGCTGCGGTCAAATCTGGCTCCGAGCTGGGTAAACAAGCAAAAGACATTATGGACGCTGGCAAACTGGTTACCGATGAACTGGTGATCGCGCTGGTTAAAGAACGTATTGCTCAGGAAGACTGCCGTAACGGTTTCCTGCTTGACGGCTTCCCGCGTACTATTCCGCAGGCTGACGCGATGAAAGAAGCGGGCATCAATGTTGATTACGTTCTGGAGTTCGACGTACCGGACGAACTGATTGTTGATCGTATTGTTGGTCGCCGCGTTCACGCGCCATCTGGCCGTGTTTATCACGTTAAATTCAATCCGCCGAAAGTAGAAGG…	CGAGAGCCATTCGCCAGGCGGCGGATGAAGTGCTGGCAGGGCAACATGATGATGAGTTCCCGCTGGCAATCTGGCAAACGGGATCCGGTACGCAAAGCAATATGAATATGAATGAAGTACTGGCTAATCGGGCCAGCGAATTGCTTGGCGGCGTACGCGGAATGGAACGTAAAGTTCACCCTAACGATGACGTGAACAAAAGCCAAAGCTCCAATGATGTCTTCCCAACTGCTATGCACGTAGCGGCGTTATTGGCACTGCGTAAGCAACTCATTCCTCAGCTCAAAAACCTCACTCAAACTCTGAATGAGAAATCGCGTGCATTTGCCGATATCGTCAAAATTGGTCGTACCCACTTGCAGGACGCCACACCGCTGACCCTGGGACAGGAGATTTCTG…	GGTCTGCACGGCGTTGGTGTTTCGGTAGTAAACGCCCTGTCGCAAAAACTGGAGCTGGTTATTCAGCGCGAGGGTAAAATTCACCGTCAGATCTACGAACACGGTGTTCCGCAGGCACCGCTGGCGGTTACTGGTGACACCGACAAAACCGGCACCATGGTGCGTTTCTGGCCAAGCCTTGAAACTTTCACCAATGTGACCGAGTTCGAATACGATATTCTGGCGAAGCGTCTGCGTGAGCTGTCCTTCCTCAACTCCGGCGTGTCTATTCGTCTGAAAGACAAACGCGACGGCAAAGAAGACCACTTCCACTATGAAGGCGGCATTAAGGCGTTCGTTGAATATCTGAACAAGAACAAAACGCCGATTCACCCGAACATCTTCTACTTCTCCACCGAA…	CGATGCTGCCGTCGAGAAAGCCTATAAAGGTGAGCGTAAAATCTCCTGGATGGAAATTTACACCGGTGAAAAATCCACACAGGTTTATGGTCAGGACGTCTGGCTGCCTGCTGAAACCCTTGATCTGATTCGTGAATATCGCGTTGCTATCAAAGGCCCTCTGACCACTCCGGTTGGCGGCGGTATTCGTTCTCTTAACGTTGCCCTGCGTCAGGAGCTGGATCTTTACATCTGCCTGCGTCCGGTACGTTACTACCAGGGCACCCCAAGCCCGGTTAAACACCCTGAACTGACCGATATGGTTATCTTCCGTGAAAACTCGGAAGACATTTATGCGGGTATCGAATGGAAAGCTGACTCTGCCGACGCAGAGAAAGTGATTAAATTCCTGCGTGAAGA…	GGTGTAGCGCGTAAACCGGGTATGGATCGTTCCGACCTGTTTAACGTTAACGCCGGTATTGTGAAGAATCTGGTTCAGCAAGTTGCGAAAACTTGCCCGAAAGCGTGCATTGGCATTATCACTAACCCGGTTAACACCACTGTGGCTATCGCTGCGGAAGTGCTGAAAAAAGCCGGTGTTTATGACAAAAACAAGCTGTTTGGCGTTACTACGCTGGATATTATTCGTTCCAACACCTTTGTCGCGGAACTGAAAGGTAAACAACCGGGTGATGTAGAAGTGCCTGTTATTGGCGGTCACTCTGGCGTTACTATTCTGCCGCTGCTGTCACAGGTTCCTGGCGTCAGTTTTACCGAGCAGGAAGTCGCAGATCTGACCAAACGTATCCAGAACGCGGGC…	ATAACGCGCGTGAGAAAGCGCGCGGCGCGAAAGCGATCGGCACCACGGGGCGTGGTATCGGGCCTGCTTATGAAGATAAAGTGGCACGTCGCGGTCTGCGTGTTGGCGACCTTTTCGACAAAGAAACCTTCGCTGAAAAACTGAAAGAAGTGATGGAATATCACAACTTCCAGTTGGTTAACTACTACAAAGTTGAAGCGGTTGATTACCAGAAAGTTCTGGATGATGTGATGGCCGTTGCCGACATCCTGACTTCCATGGTGGTTGACGTTTCTGACCTGCTTGACCAGGCGCGTCAGCGTGGCGATTTCGTCATGTTTGAAGGTGCGCAGGGTACGCTTCTGGATATCGACCACGGTACTTATCCGTACGTAACCTCTTCCAACACCACTGCGGGCG…	TGCTCGTAAACTGGGCGTCGATATCGACAACCTGCTGTGTTCCCAGCCGGACACTGGCGAACAGGCGCTGGAAATCTGTGACGCCCTGGCGCGCTCTGGCGCAGTAGACGTTATCGTTGTTGACTCCGTAGCGGCACTGACGCCGAAAGCGGAAATCGAAGGTGAAATCGGCGACTCTCACATGGGTCTTGCGGCACGTATGATGAGCCAGGCGATGCGTAAGCTGGCGGGTAACCTGAAGCAGTCCAACACGCTGTTGATCTTCATCAACCAGATCCGTATGAAAATTGGTGTGATGTTCGGTAACCCGGAAACCACTACCGGTGGTAACGCGCTGAAATTCTACGCCTCTGTTCGTCTCGACATCCGTCGTATCGGCGCGGTGAAAGAGGGCGAAAA…
2001	GGGGAAAGGGACTCAGGCTCAGTTCATCATGGAGAAATATGGTATTCCGCAAATCTCCACAGGTGATATGCTGCGTGCCGCAGTCAAATCTGGCTCCGAGCTGGGTAAACAAGCAAAAGACATTATGGACGCTGGCAAACTGGTTACCGATGAACTGGTGATCGCGCTGGTTAAAGAACGTATTGCTCAGGAAGACTGCCGTAACGGTTTCCTGCTTGACGGCTTCCCGCGTACTATTCCGCAGGCTGACGCGATGAAAGAAGCGGGCATCAATGTTGATTACGTTCTGGAGTTCGACGTACCGGACGAACTGATTGTTGATCGTATTGTTGGTCGTCGCGTTCACGCGCCATCTGGCCGTGTTTATCACGTTAAATTCAATCCGCCGAAAGTAGAAGG…	CGAGAGCCATTCGCCAGGCGGCGGATGAAGTGCTGGCAGGGCAACATGATGATGAGTTCCCGCTGGCAATCTGGCAAACGGGATCTGGTACGCAAAGCAATATGAATATGAATGAAGTACTGGCTAACCGGGCCAGCGAATTGCTTGGCGGCGTACGCGGAATGGAACGTAAAGTTCACCCTAACGATGACGTGAACAAAAGCCAAAGCTCCAATGATGTCTTCCCAACTGCTATGCACGTGGCGGCGTTATTGGCACTGCGTAAGCAACTCATTCCTCAGCTCAAAAACCTCACTCAAACTCTGAATGAGAAATCGCGCGCATTTGCCGATATCGTCAAAATTGGTCGTACCCACTTGCAGGACGCCACACCGCTGACCCTGGGACAGGAGATTTCTG…	GGTCTGCACGGCGTTGGTGTTTCGGTAGTAAACGCCCTGTCGCAAAAACTGGAGCTGGTTATTCAGCGCGAGGGTAAAATTCACCGTCAGATCTACGAACACGGTGTTCCGCAGGCACCGCTGGCGGTTACTGGTGACACCGACAAAACCGGCACCATGGTGCGTTTCTGGCCAAGCCTTGAAACTTTCACCAATGTGACCGAGTTCGAATACGATATTCTGGCGAAGCGTCTGCGTGAGCTGTCCTTCCTCAATTCCGGCGTGTCTATTCGTCTGAAAGACAAACGCGACGGCAAAGAAGACCACTTCCACTATGAAGGCGGCATTAAGGCGTTCGTTGAATATCTGAACAAGAACAAAACGCCGATTCACCCGAACATCTTCTACTTCTCCACCGAA…	CGATGCTGCCGTCGAGAAAGCCTATAAAGGTGAGCGTAAAATCTCCTGGATGGAAATTTACACCGGTGAAAAATCCACACAGGTTTATGGTCAGGACGTCTGGCTGCCTGCTGAAACCCTTGATCTGATTCGTGAATATCGCGTTGCTATCAAAGGCCCTCTGACCACTCCGGTTGGCGGCGGTATTCGTTCTCTTAACGTTGCCCTGCGTCAGGAGCTGGATCTTTACATCTGCCTGCGTCCGGTACGTTACTACCAGGGCACCCCAAGCCCGGTTAAACACCCTGAACTGACCGATATGGTTATCTTCCGTGAAAACTCGGAAGACATTTATGCGGGTATCGAATGGAAAGCTGACTCTGCCGACGCTGAGAAAGTGATCAAATTCCTGCGTGAAGA…	GGTGTAGCGCGTAAACCGGGTATGGATCGTTCCGACCTGTTTAACGTTAACGCCGGTATTGTGAAGAATCTGGTTCAGCAAGTTGCGAAAACTTGCCCGAAAGCGTGCATTGGCATTATCACTAACCCGGTTAACACCACTGTGGCTATCGCTGCGGAAGTGCTGAAAAAAGCCGGTGTTTATGACAAAAACAAGCTGTTTGGCGTTACTACGCTGGATATTATTCGTTCCAACACCTTTGTCGCGGAACTGAAAGGTAAACAACCGGGTGATGTAGAAGTGCCTGTTATTGGCGGTCACTCTGGCGTTACTATTCTGCCGCTGCTGTCACAGGTTCCTGGCGTCAGTTTTACCGAGCAGGAAGTCGCAGATCTGACCAAACGTATCCAGAACGCGGGC…	ATAACGCGCGTGAGAAAGCGCGTGGCGCGAAAGCGATCGGCACCACGGGGCGTGGTATCGGGCCTGCTTATGAAGATAAAGTAGCACGCCGCGGTCTGCGTGTTGGCGACCTTTTCGACAAAGAAACCTTCGCTGAAAAACTGAAAGAAGTGATGGAATATCACAACTTCCAGTTGGTTAACTACTACAAAGTTGAAGCGGTTGATTACCAGAAAGTTCTGGATGATGTGATGGCCGTTGCCGACATCCTGACTTCCATGGTGGTTGACGTTTCTGACCTGCTTGACCAGGCGCGTCAGCGTGGCGATTTCGTCATGTTTGAAGGTGCGCAGGGTACGCTTCTGGATATCGACCACGGTACTTATCCGTACGTAACCTCTTCCAACACCACTGCGGGTG…	TGCTCGTAAACTGGGCGTCGATATTGACAACCTGCTGTGTTCCCAGCCGGACACTGGCGAACAGGCGCTGGAAATCTGTGACGCCCTGGCGCGCTCTGGCGCAGTAGACGTTATCGTTGTTGACTCCGTAGCGGCACTGACGCCGAAAGCGGAAATCGAAGGTGAAATCGGCGACTCTCACATGGGCCTTGCGGCACGTATGATGAGCCAGGCGATGCGTAAGCTGGCGGGTAACCTGAAGCAGTCCAACACGCTGCTGATCTTCATCAACCAGATCCGTATGAAAATTGGTGTGATGTTCGGTAACCCGGAAACCACTACCGGTGGTAACGCGCTGAAATTCTACGCCTCTGTTCGTCTCGACATCCGTCGTATCGGCGCGGTGAAAGAGGGCGAAAA…
3487	GGGGAAAGGGACTCAGGCTCAGTTCATCATGGAGAAATATGGTATTCCGCAAATCTCCACAGGTGATATGCTGCGTGCCGCAGTCAAATCTGGCTCCGAGCTGGGTAAACAAGCAAAAGACATTATGGACGCTGGCAAACTGGTTACCGATGAACTGGTGATCGCACTGGTTAAAGAACGTATTGCTCAGGAAGACTGCCGTAACGGTTTCCTGCTTGACGGCTTCCCGCGTACTATTCCGCAGGCTGACGCGATGAAAGAAGCGGGCATCAATGTTGATTACGTTCTGGAGTTCGACGTACCGGACGAACTGATTGTTGATCGTATTGTTGGTCGCCGCGTTCACGCGCCATCTGGCCGTGTTTATCACGTTAAATTCAATCCGCCGAAAGTAGAAGG…	CGAGAGCCATTCGCCAGGCGGCGGATGAAGTGCTGGCAGGGCAACATGATGATGAGTTCCCGCTGGCAATCTGGCAAACGGGATCTGGTACGCAAAGCAATATGAATATGAATGAAGTACTGGCTAACCGGGCCAGCGAATTGCTTGGCGGCGTACGCGGAATGGAACGTAAAGTTCACCCTAACGATGACGTGAACAAAAGCCAAAGCTCCAATGATGTCTTCCCAACTGCTATGCACGTGGCGGCGTTATTGGCACTGCGTAAGCAACTCATTCCTCAGCTCAAAAACCTCACTCAAACTCTGAATGAGAAATCGCGCGCATTTGCCGATATCGTCAAAATTGGTCGTACCCACTTGCAGGACGCCACACCGCTGACCCTGGGACAGGAGATTTCTG…	GGTCTGCACGGCGTTGGTGTTTCGGTAGTAAACGCCCTGTCGCAAAAACTGGAGCTGGTTATTCAGCGCGAGGGTAAAATTCACCGTCAGATCTACGAACACGGTGTTCCGCAGGCACCGCTGGCGGTTACTGGTGACACCGACAAAACCGGCACCATGGTGCGTTTCTGGCCAAGCCTTGAAACTTTCACCAATGTGACCGAGTTCGAATACGATATTCTGGCGAAGCGTCTGCGTGAGCTGTCCTTCCTCAATTCCGGCGTGTCTATTCGTCTGAAAGACAAACGCGACGGCAAAGAAGACCACTTCCACTATGAAGGCGGCATTAAGGCGTTCGTTGAATATCTGAACAAGAACAAAACGCCGATTCACCCGAACATCTTCTACTTCTCCACCGAA…	CGATGCTGCCGTCGAGAAAGCCTATAAAGGTGAGCGTAAAATCTCCTGGATGGAAATTTACACCGGTGAAAAATCCACACAGGTTTATGGTCAGGACGTCTGGCTGCCTGCTGAAACCCTTGATCTGATTCGTGAATATCGCGTTGCTATCAAAGGCCCTCTGACCACTCCGGTTGGCGGCGGTATTCGTTCTCTTAACGTTGCCCTGCGTCAGGAGCTGGATCTTTACATCTGCCTGCGTCCGGTACGTTACTACCAGGGCACCCCAAGCCCGGTTAAACACCCTGAACTGACCGATATGGTTATCTTCCGTGAAAACTCGGAAGACATTTATGCGGGTATCGAATGGAAAGCTGACTCTGCCGACGCTGAGAAAGTGATCAAATTCCTGCGTGAAGA…	GGTGTAGCGCGTAAACCGGGTATGGATCGTTCCGACCTGTTTAACGTTAACGCCGGTATTGTAAAGAATCTGGTTCAGCAAGTTGCGAAAACTTGCCCGAAAGCGTGCATTGGCATTATCACTAACCCGGTTAACACCACTGTGGCTATCGCTGCGGAAGTGCTGAAAAAAGCCGGTGTTTATGACAAAAACAAGCTGTTTGGCGTTACTACGCTGGATATTATTCGTTCCAACACCTTTGTCGCGGAACTGAAAGGTAAACAACCGGGTGATGTAGAAGTGCCTGTTATTGGCGGTCACTCTGGCGTTACTATTCTGCCGCTGCTGTCACAGGTTCCTGGCGTCAGTTTTACCGAGCAGGAAGTCGCAGATCTGACCAAACGTATCCAGAACGCGGGC…	ATAACGCGCGTGAGAAAGCGCGCGGCGCGAAAGCGATCGGCACCACGGGGCGTGGTATCGGGCCTGCTTATGAAGATAAAGTGGCACGTCGCGGTCTGCGTGTTGGCGACCTTTTCGACAAAGAAACCTTCGCTGAAAAACTGAAAGAAGTGATGGAATATCACAACTTCCAGTTGGTTAACTACTACAAAGTTGAAGCGGTTGATTACCAGAAAGTTCTGGATGATGTGATGGCCGTTGCCGACATCCTGACTTCCATGGTGGTTGACGTTTCTGACCTGCTTGACCAGGCGCGTCAGCGTGGCGATTTCGTCATGTTTGAAGGTGCGCAGGGTACGCTGCTGGATATCGACCACGGTACTTATCCGTACGTAACCTCTTCCAACACCACTGCGGGCG…	TGCTCGTAAACTGGGCGTCGATATCGACAACCTGCTGTGTTCCCAGCCGGACACTGGCGAACAGGCGCTGGAAATCTGTGACGCCCTGGCGCGCTCTGGCGCAGTAGACGTTATCGTTGTTGACTCCGTAGCGGCACTGACGCCGAAAGCGGAAATCGAAGGTGAAATCGGCGACTCTCACATGGGTCTTGCGGCACGTATGATGAGCCAGGCGATGCGTAAGCTGGCGGGTAACCTGAAGCAGTCCAACACGCTGCTGATCTTCATCAACCAGATCCGTATGAAAATTGGTGTGATGTTCGGTAACCCGGAAACCACTACCGGTGGTAACGCGCTGAAATTCTACGCCTCTGTTCGTCTCGACATCCGTCGTATCGGCGCGGTGAAAGAGGGCGAAAA…
3493	GGGGAAAGGGACTCAGGCTCAGTTCATCATGGAGAAATATGGTATTCCGCAAATCTCCACAGGTGATATGCTGCGTGCCGCAGTCAAATCTGGCTCCGAGCTGGGTAAACAAGCAAAAGACATTATGGACGCTGGCAAACTGGTTACCGATGAACTGGTGATCGCGCTGGTTAAAGAACGTATTGCTCAGGAAGACTGCCGTAACGGTTTTCTGCTTGACGGCTTCCCGCGTACTATTCCGCAGGCTGACGCGATGAAAGAAGCGGGCATCAATGTTGATTACGTTCTGGAGTTCGACGTACCGGACGAACTGATTGTTGATCGTATTGTTGGTCGCCGCGTTCACGCGCCATCTGGCCGTGTTTATCACGTTAAATTCAATCCGCCGAAAGTAGAAGG…	CGAGAGCCATTCGCCAGGCGGCGGATGAAGTGCTGGCAGGACAACATGATGATGAGTTCCCGCTGGCAATCTGGCAAACGGGATCCGGTACGCAAAGCAATATGAATATGAATGAAGTACTGGCTAACCGGGCCAGCGAATTGCTTGGCGGCGTACGCGGAATGGAACGTAAAGTTCACCCTAACGATGACGTGAACAAAAGCCAAAGCTCCAATGATGTCTTCCCAACTGCTATGCACGTGGCGGCGTTATTGGCACTGCGTAAGCAACTCATTCCTCAGCTCAAAAACCTCACTCAAACTCTGAATGAGAAATCGCGCGCATTTGCCGATATCGTCAAAATTGGTCGTACCCACTTGCAGGACGCCACACCGCTGACCCTGGGACAGGAGATTTCTG…	GGTCTGCACGGCGTTGGTGTTTCGGTAGTAAACGCCCTGTCGCAAAAACTGGAGCTGGTTATTCAGCGCGAGGGTAAAATTCACCGTCAGATCTACGAACACGGTGTTCCGCAGGCACCGCTGGCGGTTACTGGTGACACCGACAAAACCGGCACCATGGTGCGTTTCTGGCCAAGCCTTGAAACTTTCACCAATGTGACCGAGTTCGAATACGATATTCTGGCGAAGCGTCTGCGTGAGCTGTCCTTCCTCAACTCCGGCGTGTCTATTCGTCTGAAAGACAAACGCGACGGCAAAGAAGACCACTTCCACTATGAAGGCGGCATTAAGGCGTTCGTTGAATATCTGAACAAGAACAAAACGCCGATTCACCCGAACATCTTCTACTTCTCCACCGAA…	CGATGCTGCCGTCGAGAAAGCCTATAAAGGTGAGCGTAAAATCTCCTGGATGGAAATTTACACCGGTGAAAAATCCACACAGGTTTATGGTCAGGACGTCTGGCTGCCTGCTGAAACCCTTGATCTGATTCGTGAATATCGCGTTGCTATCAAAGGCCCTCTGACCACTCCGGTTGGCGGCGGTATTCGTTCTCTTAACGTTGCCCTGCGTCAGGAGCTGGATCTTTACATCTGCCTGCGTCCGGTACGTTACTACCAGGGCACCCCAAGCCCGGTTAAACACCCTGAACTGACCGATATGGTTATCTTCCGTGAAAACTCGGAAGACATTTATGCGGGTATCGAATGGAAAGCTGACTCTGCCGACGCTGAGAAAGTGATCAAATTCCTGCGTGAAGA…	GGTGTAGCGCGTAAACCGGGTATGGATCGTTCCGACCTGTTTAACGTTAACGCCGGTATTGTGAAGAATCTGGTTCAGCAAGTTGCGAAAACTTGCCCGAAAGCGTGCATTGGCATTATCACTAACCCGGTTAACACCACTGTGGCTATCGCTGCGGAAGTGCTGAAAAAAGCCGGTGTTTATGACAAAAACAAGCTGTTTGGCGTTACTACGCTGGATATTATTCGTTCCAACACCTTTGTCGCGGAACTGAAAGGTAAACAACCGGGTGATGTAGAAGTGCCTGTTATTGGCGGTCACTCTGGCGTTACTATTCTGCCGCTGCTGTCACAGGTTCCTGGCGTCAGTTTTACCGAGCAGGAAGTCGCAGATCTGACCAAACGTATCCAGAACGCGGGC…	ATAACGCGCGTGAGAAAGCGCGCGGCGCGAAAGCGATCGGCACCACGGGGCGTGGTATCGGGCCTGCTTATGAAGATAAAGTGGCACGTCGCGGTCTGCGTGTTGGCGACCTTTTCGACAAAGAAACCTTCGCTGAAAAACTGAAAGAAGTGATGGAATATCACAACTTCCAGTTGGTTAACTACTACAAAGTTGAAGCGGTTGATTACCAGAAAGTTCTGGATGATGTGATGGCCGTTGCCGACATCCTGACTTCCATGGTGGTTGACGTTTCTGACCTGCTTGACCAGGCGCGTCAGCGTGGCGATTTCGTCATGTTTGAAGGTGCGCAGGGTACGCTTCTGGATATCGACCACGGTACTTATCCGTACGTAACCTCTTCCAACACCACTGCGGGCG…	TGCTCGTAAACTGGGCGTCGATATCGACAACCTGCTGTGTTCCCAGCCGGACACTGGCGAACAGGCGCTGGAAATCTGTGACGCCCTGGCGCGCTCTGGCGCAGTAGATGTTATCGTTGTTGACTCCGTAGCGGCACTGACGCCGAAAGCGGAAATCGAAGGTGAAATCGGCGACTCTCACATGGGCCTTGCGGCACGTATGATGAGCCAGGCGATGCGTAAGCTGGCGGGTAACCTGAAGCAGTCCAACACGCTGCTGATCTTCATCAACCAGATCCGTATGAAAATTGGTGTGATGTTCGGTAACCCGGAAACCACTACCGGTGGTAACGCGCTGAAATTCTACGCCTCTGTTCGTCTCGACATCCGTCGTATCGGCGCGGTGAAAGAGGGCGAAAA…
3497	GGGGAAAGGGACTCAGGCTCAGTTCATCATGGAGAAATATGGTATTCCGCAAATCTCCACAGGTGATATGCTGCGTGCCGCAGTCAAATCTGGCTCCGAGCTGGGTAAACAAGCAAAAGACATTATGGACGCTGGCAAACTGGTTACCGATGAACTGGTGATCGCGCTGGTTAAAGAACGTATTGCTCAGGAAGACTGCCGTAACGGTTTCCTGCTTGACGGCTTCCCGCGTACTATTCCGCAGGCTGACGCGATGAAAGAAGCGGGCATCAATGTTGATTACGTTCTGGAGTTCGACGTACCGGACGAACTGATTGTTGATCGTATTGTTGGTCGCCGCGTTCACGCGCCATCTGGCCGTGTTTATCACGTTAAATTCAATCCGCCGAAAGTAGAAGG…	CGAGAGCCATTCGCCAGGCGGCGGATGAAGTGCTGGCAGGGCAACATGATGATGAGTTCCCGCTGGCAATCTGGCAAACGGGCTCCGGTACGCAAAGCAATATGAATATGAATGAAGTACTGGCTAATCGGGCCAGCGAATTGCTTGGCGGCGTACGCGGAATGGAACGTAAAGTTCACCCTAACGATGACGTGAACAAAAGCCAAAGCTCCAATGATGTCTTCCCAACTGCTATGCACGTGGCGGCGTTATTGGCACTGCGTAAGCAACTCATTCCTCAGCTCAAAAACCTCACTCAAACTCTGAATGAGAAATCGCGCGCATTTGCTGATATCGTCAAAATTGGTCGTACCCACTTGCAGGACGCCACACCGCTGACCCTGGGACAGGAGATTTCTG…	GGTCTGCACGGCGTTGGTGTTTCGGTAGTAAACGCCCTGTCGCAAAAACTGGAGCTGGTTATTCAGCGCGAGGGTAAAATTCACCGTCAGATCTACGAACACGGTGTTCCGCAGGCACCGCTGGCGGTTACTGGTGACACCGACAAAACCGGCACCATGGTGCGTTTCTGGCCAAGCCTTGAAACTTTCACCAATGTGACCGAGTTCGAATACGATATTCTGGCGAAGCGTCTGCGTGAGCTGTCCTTCCTCAACTCCGGCGTGTCTATTCGTCTGAAAGACAAACGCGACGGCAAAGAAGACCACTTCCACTATGAAGGCGGCATTAAGGCGTTCGTTGAATATCTGAACAAGAACAAAACGCCGATTCACCCGAACATCTTCTACTTCTCCACCGAA…	CGATGCTGCCGTCGAGAAAGCCTATAAAGGTGAGCGTAAAATCTCCTGGATGGAAATTTACACCGGTGAAAAATCCACACAGGTTTATGGTCAGGACGTCTGGCTGCCTGCTGAAACCCTTGATCTGATTCGTGAATATCGCGTTGCTATCAAAGGCCCTCTGACCACTCCGGTTGGCGGCGGTATTCGTTCTCTTAACGTTGCCCTGCGTCAGGAGCTGGATCTTTACATCTGCCTGCGTCCGGTACGTTACTACCAGGGCACCCCAAGCCCGGTTAAACACCCTGAACTGACCGATATGGTTATCTTCCGTGAAAACTCGGAAGACATTTATGCGGGTATCGAATGGAAAGCTGACTCTGCCGACGCTGAGAAAGTGATCAAATTCCTGCGTGAAGA…	GGTGTAGCGCGTAAACCGGGTATGGATCGTTCCGACCTGTTTAACGTTAACGCCGGTATTGTAAAGAATCTGGTTCAGCAAGTTGCGAAAACTTGCCCGAAAGCGTGCATTGGCATTATCACTAACCCGGTTAACACCACTGTGGCTATCGCTGCGGAAGTGCTGAAAAAAGCCGGTGTTTATGACAAAAACAAGCTGTTTGGCGTTACTACGCTGGATATTATTCGTTCCAACACCTTTGTCGCGGAACTGAAAGGTAAACAACCGGGTGATGTAGAAGTGCCTGTTATTGGCGGTCACTCTGGCGTTACTATTCTGCCGCTGCTGTCACAGGTTCCTGGCGTCAGTTTTACCGAGCAGGAAGTCGCAGATCTGACCAAACGTATCCAGAACGCGGGT…	ATAACGCGCGTGAGAAAGCGCGTGGCGCGAAAGCGATCGGCACCACGGGGCGTGGTATCGGGCCTGCTTATGAAGATAAAGTGGCACGTCGCGGTCTGCGTGTTGGCGACCTTTTCGACAAAGAAACCTTCGCTGAAAAACTGAAAGAAGTGATGGAATATCACAACTTCCAGTTGGTTAACTACTACAAAGTTGAAGCGGTTGATTACCAGAAAGTTCTGGATGATGTGATGGCCGTTGCCGACATCCTGACTTCCATGGTGGTTGACGTTTCTGACCTGCTCGATCAGGCGCGTCAGCGTGGCGATTTCGTCATGTTTGAAGGTGCGCAGGGTACGCTTCTGGATATCGACCACGGTACTTATCCGTACGTAACCTCTTCCAACACCACTGCGGGTG…	TGCTCGTAAACTGGGCGTCGATATCGACAACCTGCTGTGTTCCCAGCCGGACACTGGCGAACAGGCGCTGGAAATCTGTGACGCCCTGGCGCGCTCTGGCGCAGTAGATGTTATCGTTGTTGACTCCGTAGCGGCACTGACGCCGAAAGCGGAAATCGAAGGTGAAATCGGCGACTCTCACATGGGCCTTGCGGCACGTATGATGAGCCAGGCGATGCGTAAGCTGGCGGGTAACCTGAAGCAGTCCAACACGCTGCTGATCTTCATCAACCAGATCCGTATGAAAATTGGTGTGATGTTCGGTAACCCGGAAACCACTACCGGTGGTAACGCGCTGAAATTCTACGCCTCTGTTCGTCTCGACATCCGTCGTATCGGCGCGGTGAAAGAGGGCGAAAA…
3503	GGGGAAAGGGACTCAGGCTCAGTTCATCATGGAGAAATATGGTATTCCGCAAATCTCCACAGGTGATATGCTGCGTGCCGCAGTCAAATCTGGCTCCGAGCTGGGTAAACAAGCAAAAGACATTATGGACGCTGGCAAACTGGTTACCGATGAACTGGTGATCGCGCTGGTTAAAGAACGTATTGCTCAGGAAGACTGCCGTAACGGTTTCCTGCTTGACGGCTTCCCGCGTACTATTCCGCAGGCTGACGCGATGAAAGAAGCGGGCATCAATGTTGATTACGTTCTGGAGTTCGACGTACCGGACGAACTGATTGTTGATCGTATTGTTGGTCGCCGCGTTCACGCGCCATCTGGCCGTGTTTATCACGTTAAATTCAATCCGCCGAAAGTAGAAGG…	CGAGAGCCATTCGCCAGGCGGCGGATGAAGTGCTGGCAGGGCAACATGATGATGAGTTCCCGCTGGCAATCTGGCAAACGGGATCTGGTACGCAAAGCAATATGAATATGAATGAAGTACTGGCTAATCGGGCCAGCGAATTGCTTGGCGGCGTACGCGGAATGGAACGTAAAGTTCACCCTAACGATGACGTGAACAAAAGCCAAAGCTCCAATGATGTCTTCCCAACTGCTATGCACGTAGCGGCGTTATTGGCACTGCGTAAGCAACTCATTCCTCAGCTCAAAAACCTCACTCAAACTCTGAATGAGAAATCGCGCGCATTTGCCGATATCGTCAAAATTGGTCGTACCCACTTGCAGGACGCCACACCGCTGACCCTGGGACAGGAGATTTCTG…	GGTCTGCACGGCGTTGGTGTTTCGGTAGTAAACGCCCTGTCGCAAAAACTGGAGCTGGTTATTCAGCGCGAGGGTAAAATTCACCGTCAGATCTACGAACACGGTGTACCGCAGGCTCCGCTGGCGGTTACCGGCGAGACTGAAAAAACCGGCACCATGGTGCGTTTCTGGCCTAGCCTCGAAACCTTCACCAATGTGACCGAATTCGAATATGACATTCTGGCGAAACGTCTGCGTGAGTTGTCGTTCCTCAACTCCGGCGTTTCCATTCGTCTGCGCGACAAGCGCGACGGCAAAGAAGACCACTTCCACTATGAAGGCGGCATTAAGGCGTTCGTTGAATATCTGAACAAGAACAAAACGCCGATTCACCCGAACATCTTCTACTTCTCCACCGAA…	CGATGCTGCCGTCGAGAAAGCCTATAAAGGTGAGCGTAAAATCTCCTGGATGGAAATTTACACCGGTGAAAAATCCACACAGGTTTATGGTCAGGACGTCTGGCTGCCTGCTGAAACCCTTGATCTGATTCGTGAATATCGCGTTGCTATCAAAGGCCCTCTGACCACTCCGGTTGGCGGCGGTATTCGTTCTCTTAACGTTGCCCTGCGTCAGGAGCTGGATCTTTACATCTGCCTGCGTCCGGTACGTTACTACCAGGGCACCCCAAGCCCGGTTAAACACCCTGAACTGACCGATATGGTTATCTTCCGTGAAAACTCGGAAGACATTTATGCGGGTATCGAATGGAAAGCTGACTCTGCCGACGCTGAGAAAGTGATCAAATTCCTGCGTGAAGA…	GGTGTAGCGCGTAAACCGGGTATGGATCGTTCCGACCTGTTTAACGTTAACGCCGGTATTGTGAAGAATCTGGTTCAGCAAGTTGCGAAAACTTGCCCGAAAGCGTGCATTGGCATTATCACTAACCCGGTTAACACCACTGTGGCTATCGCTGCGGAAGTGCTGAAAAAAGCCGGTGTTTATGACAAAAACAAGCTGTTTGGCGTTACTACGCTGGATATTATTCGTTCCAACACCTTTGTCGCGGAACTGAAAGGTAAACAACCGGGTGATGTAGAAGTGCCTGTTATTGGCGGTCACTCTGGCGTTACTATTCTGCCGCTGCTGTCACAGGTTCCTGGCGTCAGTTTTACCGAGCAGGAAGTCGCAGATCTGACCAAACGTATCCAGAACGCGGGC…	ATAACGCGCGTGAGAAAGCGCGTGGCGCGAAAGCGATCGGCACCACGGGGCGTGGTATCGGGCCTGCTTATGAAGATAAAGTAGCACGCCGCGGTCTGCGTGTTGGCGACCTTTTCGACAAAGAAACCTTCGCTGAAAAACTGAAAGAAGTGATGGAATATCACAACTTCCAGTTGGTTAACTACTACAAAGTTGAAGCGGTTGATTACCAGAAAGTTCTGGATGATGTGATGGCCGTTGCCGACATCCTGACTTCCATGGTGGTTGACGTTTCTGACCTGCTTGACCAGGCGCGTCAGCGTGGCGATTTCGTCATGTTTGAAGGTGCGCAGGGTACGCTTCTGGATATCGACCACGGTACTTATCCGTACGTAACCTCTTCCAACACCACTGCGGGTG…	TGCTCGTAAACTGGGCGTCGATATTGACAACCTGCTGTGTTCCCAGCCGGACACTGGCGAACAGGCGCTGGAAATCTGTGACGCCCTGGCGCGCTCTGGCGCAGTAGACGTTATCGTTGTTGACTCCGTAGCGGCACTGACGCCGAAAGCGGAAATCGAAGGTGAAATCGGCGACTCTCACATGGGCCTTGCGGCACGTATGATGAGCCAGGCGATGCGTAAGCTGGCGGGTAACCTGAAGCAGTCCAACACGCTGCTGATCTTCATCAACCAGATCCGTATGAAAATTGGTGTGATGTTCGGTAACCCGGAAACCACTACCGGTGGTAACGCGCTGAAATTCTACGCCTCTGTTCGTCTCGACATCCGTCGTATCGGCGCGGTGAAAGAGGGCGAAAA…
3506	GGGGAAAGGGACTCAGGCTCAGTTCATCATGGAGAAATATGGTATTCCGCAAATCTCCACAGGTGATATGCTGCGTGCTGCGGTCAAATCTGGCTCCGAGCTGGGTAAACAAGCAAAAGACATTATGGACGCTGGCAAACTGGTTACCGATGAACTGGTGATCGCGCTGGTTAAAGAACGTATTGCTCAGGAAGACTGCCGTAACGGTTTCCTGCTTGACGGCTTCCCGCGTACTATTCCGCAGGCTGACGCGATGAAAGAAGCGGGCATCAATGTTGATTACGTTCTGGAGTTCGACGTACCGGACGAACTGATTGTTGATCGTATTGTTGGTCGCCGCGTTCACGCGCCATCTGGCCGTGTTTATCACGTTAAATTCAATCCGCCGAAAGTAGAAGG…	CGAGAGCTATTCGCCAGGCGGCGGATGAAGTGCTGGCAGGGCAACATGATGATGAGTTCCCGCTGGCAATCTGGCAAACGGGATCTGGTACGCAAAGCAATATGAATATGAATGAAGTACTGGCTAACCGGGCCAGCGAATTGCTTGGCGGCGTACGCGGAATGGAACGTAAAGTTCACCCTAACGATGACGTGAACAAAAGCCAAAGCTCCAATGATGTCTTCCCAACTGCTATGCACGTGGCGGCGTTATTGGCACTGCGTAAGCAACTCATTCCTCAGCTCAAAAACCTCACTCAAACTCTGAATGAGAAATCGCGCGCATTTGCCGATATCGTCAAAATTGGTCGTACCCACTTGCAGGACGCCACACCGCTGACTCTGGGACAGGAGATTTCTG…	GGTCTGCACGGCGTTGGTGTTTCGGTAGTAAACGCCCTGTCGCAAAAACTGGAGCTGGTTATTCAGCGCGAGGGTAAAATTCACCGTCAGATCTACGAACACGGTGTTCCGCAGGCACCGCTGGCGGTTACTGGTGACACCGACAAAACCGGCACCATGGTGCGTTTCTGGCCAAGCCTTGAAACTTTCACCAATGTGACCGAGTTCGAATACGATATTCTGGCGAAGCGTCTGCGTGAGCTGTCCTTCCTCAATTCCGGCGTGTCTATTCGTCTGAAAGACAAACGCGACGGCAAAGAAGACCACTTCCACTATGAAGGCGGCATTAAGGCGTTCGTTGAATATCTGAACAAGAACAAAACGCCGATTCACCCGAACATCTTCTACTTCTCCACCGAA…	CGACGCTGCCGTCGAGAAAGCCTATAAAGGCGAGCGTAAAATCTCCTGGATGGAAATTTACACCGGTGAAAAATCCACACAGGTTTATGGTCAGGACGTCTGGTTGCCTGCTGAAACCCTTGATCTGATTCGTGAATATCGCGTTGCTATCAAAGGCCCTCTGACCACTCCGGTTGGCGGCGGTATTCGTTCTCTTAACGTTGCCCTGCGCCAGGAGCTGGATCTTTACATCTGCCTGCGTCCGGTACGTTACTACCAGGGCACCCCAAGCCCGGTTAAACACCCTGAACTGACCGATATGGTTATCTTCCGTGAAAACTCGGAAGACATTTATGCGGGTATCGAATGGAAAGCTGACTCTGCCGACGCTGAGAAAGTGATCAAATTCCTGCGTGAAGA…	GGTGTAGCGCGTAAACCGGGTATGGATCGTTCCGACCTGTTTAACGTTAACGCCGGTATTGTGAAGAATCTGGTTCAGCAAGTTGCGAAAACTTGCCCGAAAGCGTGCATTGGCATTATCACTAACCCGGTTAACACCACTGTGGCTATCGCTGCGGAAGTGCTGAAAAAAGCCGGTGTTTATGACAAAAACAAGCTGTTTGGCGTTACTACGCTGGATATTATTCGTTCCAACACCTTTGTCGCGGAACTGAAAGGTAAACAACCGGGTGATGTAGAAGTGCCGGTTATTGGCGGTCACTCTGGCGTTACTATTCTGCCGCTGCTGTCACAGGTTCCTGGCGTCAGTTTTACCGAGCAGGAAGTCGCAGATCTGACCAAACGTATCCAGAACGCGGGT…	ATAACGCGCGTGAGAAAGCGCGTGGCGCGAAAGCGATCGGCACCACGGGGCGTGGTATCGGGCCTGCTTATGAAGATAAAGTGGCACGTCGCGGTCTGCGTGTTGGCGACCTTTTCGACAAAGAAACCTTCGCTGAAAAACTGAAAGAAGTGATGGAATATCACAACTTCCAGTTGGTTAACTACTACAAAGTTGAAGCGGTTGATTACCAGAAAGTTCTGGATGATGTGATGGCCGTTGCCGACATCCTGACTTCCATGGTGGTTGACGTTTCTGACCTGCTCGATCAGGCGCGTCAGCGTGGCGATTTCGTCATGTTTGAAGGTGCGCAGGGTACGCTTCTGGATATCGACCACGGTACTTATCCGTACGTAACCTCTTCCAACACCACTGCGGGTG…	TGCACGTAAACTGGGCGTCGATATCGACAACCTGCTGTGCTCCCAGCCGGATACCGGCGAGCAGGCACTGGAAATCTGTGACGCCCTGGCACGTTCTGGCGCAGTAGACGTTATCGTCGTTGACTCCGTGGCGGCCCTGACGCCGAAAGCGGAAATCGAAGGCGAAATCGGCGACTCTCACATGGGCCTTGCGGCACGTATGATGAGCCAGGCGATGCGTAAGCTGGCGGGTAACCTGAAGCAGTCCAACACGCTGCTGATCTTCATCAACCAGATCCGTATGAAAATTGGTGTGATGTTCGGTAACCCGGAAACCACTACCGGTGGTAACGCGCTGAAATTCTACGCCTCTGTTCGTCTCGACATCCGTCGTATCGGCGCGGTGAAAGAGGGCGAAAA…
3515	GGGGAAAGGGACTCAGGCTCAGTTCATCATGGAGAAATATGGTATTCCGCAAATCTCCACAGGTGATATGCTGCGTGCTGCGGTCAAATCTGGCTCCGAGCTGGGTAAACAAGCAAAAGACATTATGGACGCTGGCAAACTGGTTACCGATGAACTGGTGATCGCGCTGGTTAAAGAACGTATTGCTCAGGAAGACTGCCGTAACGGTTTCCTGCTTGACGGCTTCCCGCGTACTATTCCGCAGGCTGACGCGATGAAAGAAGCGGGCATCAATGTTGATTACGTTCTGGAGTTCGACGTACCGGACGAACTGATTGTTGATCGTATTGTTGGTCGCCGCGTTCACGCGCCATCTGGCCGTGTTTATCACGTTAAATTCAATCCGCCGAAAGTAGAAGG…	CGAGAGCTATTCGCCAGGCGGCGGATGAAGTGCTGGCAGGGCAACATGATGATGAGTTCCCGCTGGCAATCTGGCAAACGGGATCTGGTACGCAAAGCAATATGAATATGAATGAAGTACTGGCTAACCGGGCCAGCGAATTGCTTGGCGGCGTACGCGGAATGGAACGTAAAGTTCACCCTAACGATGACGTGAACAAAAGCCAAAGCTCCAATGATGTCTTCCCAACTGCTATGCACGTGGCGGCGTTATTGGCACTGCGTAAGCAACTCATTCCTCAGCTCAAAAACCTCACTCAAACTCTGAATGAGAAATCGCGCGCATTTGCCGATATCGTCAAAATTGGTCGTACCCACTTGCAGGACGCCACACCGCTGACTCTGGGACAGGAGATTTCTG…	GGTCTGCACGGCGTTGGTGTTTCGGTAGTAAACGCCCTGTCGCAAAAACTGGAGCTGGTTATTCAGCGCGAGGGTAAAATTCACCGTCAGATCTACGAACACGGTGTTCCGCAGGCACCGCTGGCGGTTACTGGTGACACCGACAAAACCGGCACCATGGTGCGTTTCTGGCCAAGCCTTGAAACTTTCACCAATGTGACCGAGTTCGAATACGATATTCTGGCGAAGCGTCTGCGTGAGCTGTCCTTCCTCAATTCCGGCGTGTCTATTCGTCTGAAAGACAAACGCGACGGCAAAGAAGACCACTTCCACTATGAAGGCGGCATTAAGGCGTTCGTTGAATATCTGAACAAGAACAAAACGCCGATTCACCCGAACATCTTCTACTTCTCCACCGAA…	CGACGCTGCCGTCGAGAAAGCCTATAAAGGCGAGCGTAAAATCTCCTGGATGGAAATTTACACCGGTGAAAAATCCACACAGGTTTATGGTCAGGACGTCTGGTTGCCTGCTGAAACCCTTGATCTGATTCGTGAATATCGCGTTGCTATCAAAGGCCCTCTGACCACTCCGGTTGGCGGCGGTATTCGTTCTCTTAACGTTGCCCTGCGCCAGGAGCTGGATCTTTACATCTGCCTGCGTCCGGTACGTTACTACCAGGGCACCCCAAGCCCGGTTAAACACCCTGAACTGACCGATATGGTTATCTTCCGTGAAAACTCGGAAGACATTTATGCGGGTATCGAATGGAAAGCTGACTCTGCCGACGCTGAGAAAGTGATCAAATTCCTGCGTGAAGA…	GGTGTAGCGCGTAAACCGGGTATGGATCGTTCCGACCTGTTTAACGTTAACGCCGGTATTGTGAAGAATCTGGTTCAGCAAGTTGCGAAAACTTGCCCGAAAGCGTGCATTGGCATTATCACTAACCCGGTTAACACCACTGTGGCTATCGCTGCGGAAGTGCTGAAAAAAGCCGGTGTTTATGACAAAAACAAGCTGTTTGGCGTTACTACGCTGGATATTATTCGTTCCAACACCTTTGTCGCGGAACTGAAAGGTAAACAACCGGGTGATGTAGAAGTGCCGGTTATTGGCGGTCACTCTGGCGTTACTATTCTGCCGCTGCTGTCACAGGTTCCTGGCGTCAGTTTTACCGAGCAGGAAGTCGCAGATCTGACCAAACGTATCCAGAACGCGGGT…	ATAACGCGCGTGAGAAAGCGCGTGGCGCGAAAGCGATCGGCACCACGGGGCGTGGTATCGGGCCTGCTTATGAAGATAAAGTGGCACGTCGCGGTCTGCGTGTTGGCGACCTTTTCGACAAAGAAACCTTCGCTGAAAAACTGAAAGAAGTGATGGAATATCACAACTTCCAGTTGGTTAACTACTACAAAGTTGAAGCGGTTGATTACCAGAAAGTTCTGGATGATGTGATGGCCGTTGCCGACATCCTGACTTCCATGGTGGTTGACGTTTCTGACCTGCTCGATCAGGCGCGTCAGCGTGGCGATTTCGTCATGTTTGAAGGTGCGCAGGGTACGCTTCTGGATATCGACCACGGTACTTATCCGTACGTAACCTCTTCCAACACCACTGCGGGTG…	TGCTCGTAAACTGGGCGTCGATATCGACAACCTGCTGTGTTCCCAGCCGGACACTGGCGAACAGGCGCTGGAAATCTGTGACGCTCTGGCGCGCTCTGGCGCAGTAGATGTTATCGTTGTTGACTCCGTAGCGGCACTGACGCCGAAAGCGGAAATCGAAGGTGAAATCGGCGACTCTCACATGGGCCTTGCGGCACGTATGATGAGCCAGGCGATGCGTAAGCTGGCGGGTAACCTGAAGCAGTCCAACACGCTGCTGATCTTCATCAACCAGATCCGTATGAAAATTGGTGTGATGTTCGGTAACCCGGAAACCACTACCGGTGGTAACGCGCTGAAATTCTACGCCTCTGTTCGTCTCGACATCCGTCGTATCGGCGCGGTGAAAGAGGGCGAAAA…
3520	GGGGAAAGGGACTCAGGCTCAGTTCATCATGGAGAAATATGGTATTCCGCAAATCTCCACAGGTGATATGCTGCGTGCTGCGGTCAAATCTGGCTCCGAGCTGGGTAAACAAGCAAAAGACATTATGGACGCTGGCAAACTGGTTACCGATGAACTGGTGATCGCGCTGGTTAAAGAACGTATTGCTCAGGAAGACTGCCGTAACGGTTTCCTGCTTGACGGCTTCCCGCGTACTATTCCGCAGGCTGACGCGATGAAAGAAGCGGGCATCAATGTTGATTACGTTCTGGAGTTCGACGTACCGGACGAACTGATTGTTGATCGTATTGTTGGTCGCCGCGTTCACGCGCCATCTGGCCGTGTTTATCACGTTAAATTCAATCCGCCGAAAGTAGAAGG…	CGAGAGCTATTCGCCAGGCGGCGGATGAAGTGCTGGCAGGGCAACATGATGATGAGTTCCCGCTGGCAATCTGGCAAACGGGATCTGGTACGCAAAGCAATATGAATATGAATGAAGTACTGGCTAACCGGGCCAGCGAATTGCTTGGCGGCGTACGCGGAATGGAACGTAAAGTTCACCCTAACGATGACGTGAACAAAAGCCAAAGCTCCAATGATGTCTTCCCAACTGCTATGCACGTGGCGGCGTTATTGGCACTGCGTAAGCAACTCATTCCTCAGCTCAAAAACCTCACTCAAACTCTGAATGAGAAATCGCGCGCATTTGCCGATATCGTCAAAATTGGTCGTACCCACTTGCAGGACGCCACACCGCTGACTCTGGGACAGGAGATTTCTG…	GGTCTGCACGGCGTTGGTGTTTCGGTAGTAAACGCCCTGTCGCAAAAACTGGAGCTGGTTATTCAGCGCGAGGGTAAAATTCACCGTCAGATCTACGAACACGGTGTTCCGCAGGCACCGCTGGCGGTTACTGGTGACACCGACAAAACCGGCACCATGGTGCGTTTCTGGCCAAGCCTTGAAACTTTCACCAATGTGACCGAGTTCGAATACGATATTCTGGCGAAGCGTCTGCGTGAGCTGTCCTTCCTCAATTCCGGCGTGTCTATTCGTCTGAAAGACAAACGTGACGGCAAAGAAGACCACTTCCACTATGAAGGCGGCATTAAGGCGTTCGTTGAATATCTGAACAAGAACAAAACGCCGATTCACCCGAACATCTTCTACTTCTCCACCGAA…	CGACGCTGCCGTCGAGAAAGCCTATAAAGGCGAGCGTAAAATCTCCTGGATGGAAATTTACACCGGTGAAAAATCCACACAGGTTTATGGTCAGGACGTCTGGTTGCCTGCTGAAACCCTTGATCTGATTCGTGAATATCGCGTTGCTATCAAAGGCCCTCTGACCACTCCGGTTGGCGGCGGTATTCGTTCTCTTAACGTTGCCCTGCGCCAGGAGCTGGATCTTTACATCTGCCTGCGTCCGGTACGTTACTACCAGGGCACCCCAAGCCCGGTTAAACACCCTGAACTGACCGATATGGTTATCTTCCGTGAAAACTCGGAAGACATTTATGCGGGTATCGAATGGAAAGCTGACTCTGCCGACGCTGAGAAAGTGATCAAATTCCTGCGTGAAGA…	GGTGTAGCGCGTAAACCGGGTATGGATCGTTCCGACCTGTTTAACGTTAACGCCGGTATTGTGAAGAATCTGGTTCAGCAAGTTGCGAAAACTTGCCCGAAAGCGTGCATTGGCATTATCACTAACCCGGTTAACACCACTGTGGCTATCGCTGCGGAAGTGCTGAAAAAAGCCGGTGTTTATGACAAAAACAAGCTGTTTGGCGTTACTACGCTGGATATTATTCGTTCCAACACCTTTGTCGCGGAACTGAAAGGTAAACAACCGGGTGATGTAGAAGTGCCGGTTATTGGCGGTCACTCTGGCGTTACTATTCTGCCGCTGCTGTCACAGGTTCCTGGCGTCAGTTTTACCGAGCAGGAAGTCGCAGATCTGACCAAACGTATCCAGAACGCGGGT…	ATAACGCGCGTGAGAAAGCGCGTGGCGCGAAAGCGATCGGCACCACGGGGCGTGGTATCGGGCCTGCTTATGAAGATAAAGTGGCACGTCGCGGTCTGCGTGTTGGCGACCTTTTCGACAAAGAAACCTTCGCTGAAAAACTGAAAGAAGTGATGGAATATCACAACTTCCAGTTGGTTAACTACTACAAAGTTGAAGCGGTTGATTACCAGAAAGTTCTGGATGATGTGATGGCCGTTGCCGACATCCTGACTTCCATGGTGGTTGACGTTTCTGACCTGCTCGATCAGGCGCGTCAGCGTGGCGATTTCGTCATGTTTGAAGGTGCGCAGGGTACGCTTCTGGATATCGACCACGGTACTTATCCGTACGTAACCTCTTCCAACACCACTGCGGGCG…	TGCTCGTAAACTGGGCGTCGATATCGACAACCTGCTGTGTTCCCAGCCGGACACTGGCGAACAGGCGCTGGAAATCTGTGACGCCCTGGCGCGCTCTGGCGCAGTAGATGTTATCGTTGTTGACTCCGTAGCGGCACTGACGCCGAAAGCGGAAATCGAAGGTGAAATCGGCGACTCTCACATGGGCCTTGCGGCACGTATGATGAGCCAGGCGATGCGTAAGCTGGCGGGTAACCTGAAGCAGTCCAACACGCTGCTGATCTTCATCAACCAGATCCGTATGAAAATTGGTGTGATGTTCGGTAACCCGGAAACCACTACCGGTGGTAACGCGCTGAAATTCTACGCCTCTGTTCGTCTCGACATCCGTCGTATCGGCGCGGTGAAAGAGGGCGAAAA…
3521	GGGGAAAGGGACTCAGGCTCAGTTCATCATGGAGAAATATGGTATTCCGCAAATCTCCACAGGTGATATGCTGCGTGCTGCGGTCAAATCTGGCTCCGAGCTGGGTAAACAAGCAAAAGACATTATGGACGCTGGCAAACTGGTTACCGATGAACTGGTGATCGCGCTGGTTAAAGAACGTATTGCTCAGGAAGACTGCCGTAACGGTTTCCTGCTTGACGGCTTCCCGCGTACTATTCCGCAGGCTGACGCGATGAAAGAAGCGGGCATCAATGTTGATTACGTTCTGGAGTTCGACGTACCGGACGAACTGATTGTTGATCGTATTGTTGGTCGCCGCGTTCACGCGCCATCTGGCCGTGTTTATCACGTTAAATTCAATCCGCCGAAAGTAGAAGG…	CGAGAGCTATTCGCCAGGCGGCGGATGAAGTGCTGGCAGGGCAACATGATGATGAGTTCCCGCTGGCAATCTGGCAAACGGGATCTGGTACGCAAAGCAATATGAATATGAATGAAGTACTGGCTAACCGGGCCAGCGAATTGCTTGGCGGCGTACGCGGAATGGAACGTAAAGTTCACCCTAACGATGACGTGAACAAAAGCCAAAGCTCCAATGATGTCTTCCCAACTGCTATGCACGTGGCGGCGTTATTGGCACTGCGTAAGCAACTCATTCCTCAGCTCAAAAACCTCACTCAAACTCTGAATGAGAAATCGCGCGCATTTGCCGATATCGTCAAAATTGGTCGTACCCACTTGCAGGACGCCACACCGCTGACTCTGGGACAGGAGATTTCTG…	GGTCTGCACGGCGTTGGTGTTTCGGTAGTAAACGCCCTGTCGCAAAAACTGGAGCTGGTTATTCAGCGCGAGGGTAAAATTCACCGTCAGATCTACGAACACGGTGTTCCGCAGGCACCGCTGGCGGTTACTGGTGACACCGACAAAACCGGCACCATGGTGCGTTTCTGGCCAAGCCTTGAAACTTTCACCAATGTGACCGAGTTCGAATACGATATTCTGGCGAAGCGTCTGCGTGAGCTGTCCTTCCTCAATTCCGGCGTGTCTATTCGTCTGAAAGACAAACGTGACGGCAAAGAAGACCACTTCCACTATGAAGGCGGCATTAAGGCGTTCGTTGAATATCTGAACAAGAACAAAACGCCGATTCACCCGAACATCTTCTACTTCTCCACCGAA…	CGACGCTGCCGTCGAGAAAGCCTATAAAGGCGAGCGTAAAATCTCCTGGATGGAAATTTACACCGGTGAAAAATCCACACAGGTTTATGGTCAGGACGTCTGGTTGCCTGCTGAAACCCTTGATCTGATTCGTGAATATCGCGTTGCTATCAAAGGCCCTCTGACCACTCCGGTTGGCGGCGGTATTCGTTCTCTTAACGTTGCCCTGCGCCAGGAGCTGGATCTTTACATCTGCCTGCGTCCGGTACGTTACTACCAGGGCACCCCAAGCCCGGTTAAACACCCTGAACTGACCGATATGGTTATCTTCCGTGAAAACTCGGAAGACATTTATGCGGGTATCGAATGGAAAGCTGACTCTGCCGACGCTGAGAAAGTGATCAAATTCCTGCGTGAAGA…	GGTGTAGCGCGTAAACCGGGTATGGATCGTTCCGACCTGTTTAACGTTAACGCCGGTATTGTGAAGAATCTGGTTCAGCAAGTTGCGAAAACTTGCCCGAAAGCGTGCATTGGCATTATCACTAACCCGGTTAACACCACTGTGGCTATCGCTGCGGAAGTGCTGAAAAAAGCCGGTGTTTATGACAAAAACAAGCTGTTTGGCGTTACTACGCTGGATATTATTCGTTCCAACACCTTTGTCGCGGAACTGAAAGGTAAACAACCGGGTGATGTAGAAGTGCCGGTTATTGGCGGTCACTCTGGCGTTACTATTCTGCCGCTGCTGTCACAGGTTCCTGGCGTCAGTTTTACCGAGCAGGAAGTCGCAGATCTGACCAAACGTATCCAGAACGCGGGT…	ATAACGCGCGTGAGAAAGCGCGTGGCGCGAAAGCGATCGGCACCACGGGGCGTGGTATCGGGCCTGCTTATGAAGATAAAGTGGCACGTCGCGGTCTGCGTGTTGGCGACCTTTTCGACAAAGAAACCTTCGCTGAAAAACTGAAAGAAGTGATGGAATATCACAACTTCCAGTTGGTTAACTACTACAAAGTTGAAGCGGTTGATTACCAGAAAGTTCTGGATGATGTGATGGCCGTTGCCGACATCCTGACTTCCATGGTGGTTGACGTTTCTGACCTGCTCGATCAGGCGCGTCAGCGTGGCGATTTCGTCATGTTTGAAGGTGCGCAGGGTACGCTTCTGGATATCGACCACGGTACTTATCCGTACGTAACCTCTTCCAACACCACTGCGGGTG…	TGCTCGTAAACTGGGCGTCGATATCGACAACCTGCTGTGTTCCCAGCCGGACACTGGCGAACAGGCGCTGGAAATCTGTGACGCCCTGGCGCGCTCTGGCGCAGTAGATGTTATCGTTGTTGACTCCGTAGCGGCACTGACGCCGAAAGCGGAAATCGAAGGTGAAATCGGCGACTCTCACATGGGCCTTGCGGCACGTATGATGAGCCAAGCGATGCGTAAGCTGGCGGGTAACCTGAAGCAGTCCAACACGCTGCTGATCTTCATCAACCAGATCCGTATGAAAATTGGTGTGATGTTCGGTAACCCGGAAACCACTACCGGTGGTAACGCGCTGAAATTCTACGCCTCTGTTCGTCTCGACATCCGTCGTATCGGCGCGGTGAAAGAGGGCGAAAA…
3522	GGGGAAAGGGACTCAGGCTCAGTTCATCATGGAGAAATATGGTATTCCGCAAATCTCCACAGGTGATATGCTGCGTGCTGCGGTCAAATCTGGCTCCGAGCTGGGTAAACAAGCAAAAGACATTATGGACGCTGGCAAACTGGTTACCGATGAACTGGTGATCGCGCTGGTTAAAGAACGTATTGCTCAGGAAGACTGCCGTAACGGTTTCCTGCTTGACGGCTTCCCGCGTACTATTCCGCAGGCTGACGCGATGAAAGAAGCGGGCATCAATGTTGATTACGTTCTGGAGTTCGACGTACCGGACGAACTGATTGTTGATCGTATTGTTGGTCGCCGCGTTCACGCGCCATCTGGCCGTGTTTATCACGTTAAATTCAATCCGCCGAAAGTAGAAGG…	CGAGAGCTATTCGCCAGGCGGCGGATGAAGTGCTGGCAGGGCAACATGATGATGAGTTCCCGCTGGCAATCTGGCAAACGGGATCTGGTACGCAAAGCAATATGAATATGAATGAAGTACTGGCTAACCGGGCCAGCGAATTGCTTGGCGGCGTACGCGGAATGGAACGTAAAGTTCACCCTAACGATGACGTGAACAAAAGCCAAAGCTCCAATGATGTCTTCCCAACTGCTATGCACGTGGCGGCGTTATTGGCACTGCGTAAGCAACTCATTCCTCAGCTCAAAAACCTCACTCAAACTCTGAATGAGAAATCGCGCGCATTTGCCGATATCGTCAAAATTGGTCGTACCCACTTGCAGGACGCCACACCGCTGACTCTGGGACAGGAGATTTCTG…	GGTCTGCACGGCGTTGGTGTTTCGGTAGTAAACGCCCTGTCGCAAAAACTGGAGCTGGTTATTCAGCGCGAGGGTAAAATTCACCGTCAGATCTACGAACACGGTGTTCCGCAGGCACCGCTGGCGGTTACTGGTGACACCGACAAAACCGGCACCATGGTGCGTTTCTGGCCAAGCCTTGAAACTTTCACCAATGTGACCGAGTTCGAATACGATATTCTGGCGAAGCGTCTGCGTGAGCTGTCCTTCCTCAACTCCGGCGTGTCTATTCGTCTGAAAGACAAACGCGACGGCAAAGAAGACCACTTCCACTATGAAGGTGGCATTAAGGCGTTCGTTGAATATCTGAACAAGAACAAAACGCCGATTCACCCGAACATCTTCTACTTCTCCACCGAA…	CGACGCTGCCGTCGAGAAAGCCTATAAAGGCGAGCGTAAAATCTCCTGGATGGAAATTTACACCGGTGAAAAATCCACACAGGTTTATGGTCAGGACGTCTGGTTGCCTGCTGAAACCCTTGATCTGATTCGTGAATATCGCGTTGCTATCAAAGGCCCTCTGACCACTCCGGTTGGCGGCGGTATTCGTTCTCTTAACGTTGCCCTGCGCCAGGAGCTGGATCTTTACATCTGCCTGCGTCCGGTACGTTACTACCAGGGCACCCCAAGCCCGGTTAAACACCCTGAACTGACCGATATGGTTATCTTCCGTGAAAACTCGGAAGACATTTATGCGGGTATCGAATGGAAAGCTGACTCTGCCGACGCTGAGAAAGTGATCAAATTCCTGCGTGAAGA…	GGTGTAGCGCGTAAACCGGGTATGGATCGTTCCGACCTGTTTAACGTTAACGCCGGTATTGTGAAGAATCTGGTTCAGCAAGTTGCGAAAACTTGCCCGAAAGCGTGCATTGGCATTATCACTAACCCGGTTAACACCACTGTGGCTATCGCTGCGGAAGTGCTGAAAAAAGCCGGTGTTTATGACAAAAACAAGCTGTTTGGCGTTACTACGCTGGATATTATTCGTTCCAACACCTTTGTCGCGGAACTGAAAGGTAAACAACCGGGTGATGTAGAAGTGCCGGTTATTGGCGGTCACTCTGGCGTTACTATTCTGCCGCTGCTGTCACAGGTTCCTGGCGTCAGTTTTACCGAGCAGGAAGTCGCAGATCTGACCAAACGTATCCAGAACGCGGGT…	ATAACGCGCGTGAGAAAGCGCGTGGCGCGAAAGCGATCGGCACCACGGGGCGTGGTATCGGGCCTGCTTATGAAGATAAAGTGGCACGTCGCGGTCTGCGTGTTGGCGACCTTTTCGACAAAGAAACCTTCGCTGAAAAACTGAAAGAAGTGATGGAATATCACAACTTCCAGTTGGTTAACTACTACAAAGTTGAAGCGGTTGATTACCAGAAAGTTCTGGATGATGTGATGGCCGTTGCCGACATCCTGACTTCCATGGTGGTTGACGTTTCTGACCTGCTCGATCAGGCGCGTCAGCGTGGCGATTTCGTCATGTTTGAAGGTGCGCAGGGTACGCTTCTGGATATCGACCACGGTACTTATCCGTACGTAACCTCTTCCAACACCACTGCGGGTG…	TGCACGTAAACTGGGCGTCGATATCGACAACCTGCTGTGCTCCCAGCCGGATACCGGCGAGCAGGCACTGGAAATCTGTGACGCCCTGGCACGTTCTGGCGCAGTAGACGTTATCGTCGTTGACTCCGTGGCGGCCCTGACGCCGAAAGCGGAAATCGAAGGCGAAATCGGCGACTCTCACATGGGCCTTGCGGCACGTATGATGAGCCAGGCGATGCGTAAGCTGGCGGGTAACCTGAAGCAGTCCAACACGCTGCTGATCTTCATCAACCAGATCCGTATGAAAATTGGTGTGATGTTCGGTAACCCGGAAACCACTACCGGTGGTAACGCGCTGAAATTCTACGCCTCTGTTCGTCTCGACATCCGTCGTATCGGCGCGGTGAAAGAGGGCGAAAA…
3526	GGGGAAAGGGACTCAGGCTCAGTTCATCATGGAGAAATATGGTATTCCGCAAATCTCCACAGGTGATATGCTGCGTGCTGCGGTCAAATCTGGCTCCGAGCTGGGTAAACAAGCAAAAGACATTATGGACGCTGGCAAACTGGTTACCGATGAACTGGTGATCGCGCTGGTTAAAGAACGTATTGCTCAGGAAGACTGCCGTAACGGTTTCCTGCTTGACGGCTTCCCGCGTACTATTCCGCAGGCTGACGCGATGAAAGAAGCGGGCATCAATGTTGATTACGTTCTGGAGTTCGACGTACCGGACGAACTGATTGTTGATCGTATTGTTGGTCGCCGCGTTCACGCGCCATCTGGCCGTGTTTATCACGTTAAATTCAATCCGCCGAAAGTAGAAGG…	CGAGAGCTATTCGCCAGGCGGCGGATGAAGTGCTGGCAGGGCAACATGATGATGAGTTCCCGCTGGCAATCTGGCAAACGGGATCTGGTACGCAAAGCAATATGAATATGAATGAAGTACTGGCTAACCGGGCCAGCGAATTGCTTGGCGGCGTACGCGGAATGGAACGTAAAGTTCACCCTAACGATGACGTGAACAAAAGCCAAAGCTCCAATGATGTCTTCCCAACTGCTATGCACGTGGCGGCGTTATTGGCACTGCGTAAGCAACTCATTCCTCAGCTCAAAAACCTCACTCAAACTCTGAATGAGAAATCGCGCGCATTTGCCGATATCGTCAAAATTGGTCGTACCCACTTGCAGGACGCCACACCGCTGACTCTGGGACAGGAGATTTCTG…	GGTCTGCACGGCGTTGGTGTTTCGGTAGTAAACGCCCTGTCGCAAAAACTGGAGCTGGTTATTCAGCGCGAGGGTAAAATTCACCGTCAGATCTACGAACACGGTGTTCCGCAGGCACCGCTGGCGGTTACTGGTGACACCGACAAAACCGGCACCATGGTGCGTTTCTGGCCAAGCCTTGAAACTTTCACCAATGTGACCGAGTTCGAATACGATATTCTGGCGAAGCGTCTGCGTGAGCTGTCCTTCCTCAATTCCGGCGTGTCTATTCGTCTGAAAGACAAACGCGACGGCAAAGAAGACCACTTCCACTATGAAGGCGGCATTAAGGCGTTCGTTGAATATCTGAACAAGAACAAAACGCCGATTCACCCGAACATCTTCTACTTCTCCACCGAA…	CGATGCTGCCGTCGAGAAAGCCTATAAAGGTGAGCGTAAAATCTCCTGGATGGAAATTTACACCGGTGAAAAATCCACACAGGTTTATGGTCAGGACGTCTGGCTGCCTGCTGAAACCCTTGATCTGATTCGTGAATATCGCGTTGCTATCAAAGGCCCTCTGACCACTCCGGTTGGCGGCGGTATTCGTTCTCTTAACGTTGCCCTGCGCCAGGAGCTGGATCTTTACATCTGCCTGCGTCCGGTACGTTACTACCAGGGCACTCCAAGCCCGGTTAAACACCCTGAACTGACCGATATGGTTATCTTCCGTGAAAACTCGGAAGACATTTATGCGGGTATCGAATGGAAAGCTGACTCTGCCGACGCTGAGAAAGTGATCAAATTCCTGCGTGGAGA…	GGTGTAGCGCGTAAACCGGGTATGGATCGTTCCGACCTGTTTAACGTTAACGCCGGTATTGTGAAGAATCTGGTTCAGCAAGTTGCGAAAACTTGCCCGAAAGCGTGCATTGGCATTATCACTAACCCGGTTAACACCACTGTGGCTATCGCTGCGGAAGTGCTGAAAAAAGCCGGTGTTTATGACAAAAACAAGCTGTTTGGCGTTACTACGCTGGATATTATTCGTTCCAACACCTTTGTCGCGGAACTGAAAGGTAAACAACCGGGTGATGTAGAAGTGCCGGTTATTGGCGGTCACTCTGGCGTTACTATTCTGCCGCTGCTGTCACAGGTTCCTGGCGTCAGTTTTACCGAGCAGGAAGTCGCAGATCTGACCAAACGTATCCAGAACGCGGGT…	ATAACGCGCGTGAGAAAGCGCGTGGCGCGAAAGCGATCGGCACCACGGGGCGTGGTATCGGGCCTGCTTATGAAGATAAAGTGGCACGTCGCGGTCTGCGTGTTGGCGACCTTTTCGACAAAGAAACCTTCGCTGAAAAACTGAAAGAAGTGATGGAATATCACAACTTCCAGTTGGTTAACTACTACAAAGTTGAAGCGGTTGATTACCAGAAAGTTCTGGATGATGTGATGGCCGTTGCCGACATCCTGACTTCCATGGTGGTTGACGTTTCTGACCTGCTCGATCAGGCGCGTCAGCGTGGCGATTTCGTCATGTTTGAAGGTGCGCAGGGTACGCTTCTGGATATCGACCACGGTACTTATCCGTACGTAACCTCTTCCAACACCACTGCGGGTG…	TGCTCGTAAACTGGGCGTCGATATCGACAACCTGCTGTGTTCCCAGCCGGACACTGGCGAACAGGCGCTGGAAATCTGTGACGCCCTGGCGCGCTCTGGCGCAGTAGATGTTATCGTTGTTGACTCCGTAGCGGCACTGACGCCGAAAGCGGAAATCGAAGGTGAAATCGGCGACTCTCACATGGGCCTTGCGGCACGTATGATGAGCCAGGCGATGCGTAAGCTGGCGGGTAACCTGAAGCAGTCCAACACGCTGCTGATCTTCATCAACCAGATCCGTATGAAAATTGGTGTGATGTTCGGTAACCCGGAAACCACTACCGGTGGTAACGCGCTGAAATTCTACGCCTCTGTTCGTCTCGACATCCGTCGTATCGGCGCGGTGAAAGAGGGCGAAAA…
ATCC11775T	GGGGAAAGGGACTCAGGCTCAGTTCATCATGGAGAAATATGGTATTCCGCAAATCTCCACTGGCGATATGCTGCGTGCTGCGGTCAAATCTGGCTCCGAGCTGGGTAAACAAGCAAAAGACATTATGGATGCTGGCAAACTGGTCACCGACGAACTGGTGATCGCGCTGGTTAAAGAGCGCATTGCTCAGGAAGACTGCCGCTACGGTTTCCTGTTGGACGGCTTCCCGCGTACCATTCCGCAGGCAGACGCGATGAAAGAAGCGGGCATCAATGTTGATTACGTTCTGGAATTCGACGTACCGGACGAACTGATTGTTGACCGTATCGTAGGCCGCCGCGTTCACGCGCCGTCTGGTCGTGTTTATCACGTTAAATTCAATCCGCCGAAAGTAGAAGG…	CGAGCGCCATTCGGCAGGCGGCGGATGAAGTACTGGCAGGACAGCATGACGACGAATTCCCGCTGGCTATCTGGCAGACCGGCTCCGGCACGCAAAGTAACATGAACATGAACGAAGTGCTGGCTAACCGGGCCAGTGAATTACTCGGCGGCGTGCGCGGGATGGAACGTAAAGTTCACCCTAACGACGACGTGAACAAAAGCCAAAGTTCCAACGATGTCTTTCCGACGGCGATGCACGTTGCGGCGCTGCTGGCGCTGCGCAAGCAACTCATTCCACAACTTAAAACCCTGACCCAGACGCTGAGTGAAAAATCCCGCGCATTTGCCGATATCGTCAAAATCGGTCGTACCCACTTGCAGGACGCCACGCCGTTAACGCTGGGGCAGGAGATTTCCG…	GGTCTGCACGGCGTTGGTGTTTCGGTAGTAAACGCCCTGTCGCAAAAACTGGAGCTGGTTATCCAGCGCGAGGGTAAAATTCACCGTCAGATCTACGAACACGGTGTACCGCAGGCCCCGCTGGCGGTTACCGGCGAGACTGAAAAAACCGGCACTATGGTGCGTTTCTGGCCAAGCCTTGAAACCTTCACCAATGTGACCGAGTTCGAATATGACATTCTGGCGAAACGTCTGCGTGAGTTGTCGTTCCTCAACTCCGGCGTTTCCATTCGTCTGCGCGACAAGCGCGACGGCAAAGAAGACCACTTCCACTATGAAGGCGGCATCAAGGCGTTCGTTGAATATCTGAACAAGAACAAAACGCCGATCCACCCGAATATCTTCTACTTCTCCACCGAA…	CGACGCTGCAGTTGAGAAAGCCTATAAAGGCGAGCGTAAAATCTCCTGGATGGAAATTTACACCGGTGAAAAATCCACACAGGTTTATGGTCAGGACGTCTGGTTGCCTGCTGAAACCCTTGATCTGATTCGTGAATATCGCGTTGCCATTAAAGGCCCGCTGACCACTCCGGTTGGTGGCGGTATTCGCTCTCTGAACGTTGCCCTGCGCCAGGAACTGGATCTCTACATCTGCCTGCGTCCGGTACGTTACTATCAGGGCACTCCAAGCCCGGTTAAACACCCTGAACTGACCGATATGGTTATCTTCCGTGAAAACTCGGAAGACATTTATGCGGGTATCGAATGGAAAGCAGACTCTGCCGACGCTGAGAAAGTGATTAAATTCCTGCGTGAAGA…	GGCGTAGCGCGTAAACCGGGTATGGATCGTTCCGACCTGTTTAACGTTAACGCCGGCATCGTGAAAAACCTGGTACAGCAAGTTGCGAAAACCTGCCCGAAAGCGTGCATTGGTATTATCACTAACCCGGTTAACACTACAGTTGCGATTGCTGCTGAAGTGCTGAAAAAAGCCGGTGTTTATGACAAAAACAAACTGTTCGGCGTTACCACGCTGGATATCATTCGTTCCAACACCTTTGTTGCGGAACTGAAAGGCAAACAGCCAGGCGAAGTTGAAGTGCCGGTTATTGGTGGTCACTCTGGTGTTACCATTCTGCCGCTGCTGTCACAGGTTCCTGGCGTTAGTTTTACCGAGCAGGAAGTGGCTGATCTGACCAAACGTATCCAGAACGCGGGT…	ATAACGCGCGTGAGAAAGCGCGTGGCGCGAAAGCGATCGGCACCACCGGTCGTGGTATCGGGCCTGCTTATGAAGATAAAGTGGCACGTCGCGGTCTGCGTGTTGGCGACCTTTTCGACAAAGAAACCTTCGCTGAAAAACTGAAAGAAGTGATGGAATATCACAACTTCCAGTTGGTTAACTACTACAAAGCTGAAGCGGTTGATTACCAGAAAGTTCTGGATGATACGATGGCTGTTGCCGACATCCTGACTTCTATGGTTGTTGACGTTTCTGATCTGCTCGACCAGGCGCGTCAGCGTGGCGATTTCGTCATGTTTGAAGGTGCGCAGGGTACGCTGCTGGATATCGACCACGGCACTTATCCGTACGTAACTTCTTCCAACACCACTGCTGGTG…	CGCACGTAAACTGGGCGTTGATATCGACAACCTGCTGTGCTCCCAGCCGGATACCGGCGAGCAGGCACTGGAAATCTGTGACGCCCTGGCACGTTCTGGCGCAGTAGACGTTATCGTCGTTGACTCCGTGGCGGCACTGACGCCGAAAGCGGAAATCGAAGGCGAAATCGGCGACTCTCACATGGGCCTTGCGGCACGTATGATGAGCCAGGCGATGCGTAAGCTGGCGGGTAACCTGAAGCAGTCCAACACGCTGCTGATCTTCATCAACCAGATCCGTATGAAAATTGGTGTGATGTTCGGTAACCCGGAAACCACTACTGGTGGTAACGCGCTGAAATTCTACGCCTCTGTTCGTCTCGATATCCGTCGTATCGGCGCGGTGAAAGAGGGCGAAAA…
ATCC12032	GGGGAAAGGGACTCAGGCTCAGTTCATCATGGAGAAATATGGTATTCCGCAAATCTCCACAGGTGATATGCTGCGTGCTGCGGTCAAATCTGGCTCCGAGCTGGGTAAACAAGCAAAAGACATTATGGACGCTGGCAAACTGGTTACCGATGAACTGGTGATCGCGCTGGTTAAAGAACGTATTGCTCAGGAAGACTGCCGTAACGGTTTCCTGCTTGACGGCTTCCCGCGTACTATTCCGCAGGCTGACGCGATGAAAGAAGCGGGCATCAATGTTGATTACGTTCTGGAGTTCGACGTACCGGACGAACTGATTGTTGATCGTATTGTTGGTCGCCGCGTTCACGCGCCATCTGGCCGTGTTTATCACGTTAAATTCAATCCGCCGAAAGTAGAAGG…	CGAGAGCCATTCGCCAGGCGGCGGATGAAGTGCTGGCAGGGCAACATGATGATGAGTTCCCGCTGGCAATCTGGCAAACGGGATCCGGTACGCAAAGCAATATGAATATGAATGAAGTACTGGCTAATCGGGCCAGCGAATTGCTTGGCGGCGTACGCGGAATGGAACGTAAAGTTCACCCTAACGATGACGTGAACAAAAGCCAAAGCTCCAATGATGTCTTCCCAACTGCTATGCACGTGGCGGCGTTATTGGCACTGCGTAAGCAACTCATTCCTCAGCTCAAAAACCTCACTCAAACTCTGAATGAGAAATCGCGCGCATTTGCCGATATCGTCAAAATTGGTCGTACCCACTTGCAGGACGCCACACCGCTGACCCTGGGACAGGAGATTTCTG…	GGTCTGCACGGCGTTGGTGTTTCGGTAGTAAACGCCCTGTCGCAAAAACTGGAGCTGGTTATTCAGCGCGAGGGTAAAATTTACCGTCAGATCTACGAACACGGTGTTCCGCAGGCACCGCTGGCGGTTACTGGTGACACCGACAAAACCGGCACCATGGTGCGTTTCTGGCCAAGCCTTGAAACTTTCACCAATGTGACCGAGTTCGAATACGATATTCTGGCGAAGCGTCTGCGTGAGCTGTCCTTCCTCAACTCCGGCGTGTCTATTCGTCTGAAAGACAAACGCGACGGCAAAGAAGACCACTTCCACTATGAAGGCGGCATTAAGGCGTTCGTTGAATATCTGAACAAGAACAAAACGCCGATTCACCCGAACATCTTCTACTTCTCCACCGAA…	CGACGCTGCCGTCGAGAAAGCCTATAAAGGCGAGCGTAAAATCTCCTGGATGGAAATTTACACCGGTGAAAAATCCACACAGGTTTATGGTCAGGACGTCTGGCTGCCTGCTGAAACCCTTGATCTGATTCGTGAATATCGCGTTGCTATCAAAGGCCCGCTGACCACTCCGGTTGGCGGCGGTATTCGTTCTCTTAACGTTGCCCTGCGTCAGGAGCTGGATCTTTACATCTGCCTGCGTCCGGTACGTTACTATCAGGGCACTCCAAGCCCGGTTAAACACCCTGAACTGACCGATATGGTTATCTTCCGTGAAAACTCGGAAGACATTTATGCGGGTATCGAATGGAAAGCTGACTCTGCCGACGCAGAGAAAGTGATTAAATTCCTGCGTGAAGA…	GGTGTAGCGCGTAAACCGGGTATGGATCGTTCCGACCTGTTTAACGTTAACGCCGGTATTGTGAAGAATCTGGTTCAGCAAGTTGCGAAAACTTGCCCGAAAGCGTGCATTGGCATTATCACTAACCCGGTTAACACCACTGTGGCTATCGCTGCGGAAGTGCTGAAAAAAGCCGGTGTTTATGACAAAAACAAGCTGTTTGGCGTTACTACGCTGGATATTATTCGTTCCAACACCTTTGTCGCGGAACTGAAAGGTAAACAACCGGGTGATGTAGAAGTGCCGGTTATTGGCGGTCACTCTGGCGTTACTATTCTGCCGCTGCTGTCACAGGTTCCTGGCGTCAGTTTTACCGAGCAGGAAGTCGCAGATCTGACCAAACGTATCCAGAACGCGGGC…	ATAACGCGCGTGAGAAAGCGCGTGGCGCGAAAGCGATCGGCACCACGGGGCGTGGTATCGGGCCTGCTTATGAAGATAAAGTGGCACGTCGCGGTCTGCGTGTTGGCGACCTTTTCGACAAAGAAACCTTCGCTGAAAAACTGAAAGAAGTGATGGAATATCACAACTTCCAGTTGGTTAACTACTACAAAGTTGAAGCGGTTGATTACCAGAAAGTTCTGGATGATGTGATGGCCGTTGCCGACATCCTGACTTCCATGGTGGTTGACGTTTCTGACCTGCTTGACCAGGCGCGTCAGCGTGGCGATTTCGTCATGTTTGAAGGTGCGCAGGGTACGCTTCTGGATATCGACCACGGTACTTATCCGTACGTAACCTCTTCCAACACCACTGCGGGTG…	TGCTCGTAAACTGGGCGTCGATATCGACAACCTGCTGTGTTCCCAGCCGGACACTGGCGAACAGGCGCTGGAAATCTGTGACGCCCTGGCGCGCTCTGGCGCAGTAGATGTTATCGTTGTTGACTCCGTAGCGGCACTGACGCCGAAAGCGGAAATCGAAGGTGAAATCGGCGACTCTCACATGGGCCTTGCGGCACGTATGATGAGCCAGGCGATGCGTAAGCTGGCGGGTAACCTGAAGCAGTCCAACACGCTGCTGATCTTCATCAACCAGATCCGTATGAAAATTGGTGTGATGTTCGGTAACCCGGAAACCACTACCGGTGGTAACGCGCTGAAATTCTACGCCTCTGTTCGTCTCGACATCCGTCGTATCGGCGCGGTGAAAGAGGGCGAAAA…
LMG20972	GGGGAAAGGGACTCAGGCTCAGTTCATCATGGAGAAATATGGTATTCCGCAAATCTCCACAGGTGATATGCTGCGTGCCGCAGTCAAATCTGGCTCCGAGCTGGGTAAACAAGCAAAAGACATTATGGACGCTGGCAAACTGGTTACCGATGAACTGGTGATCGCGCTGGTTAAAGAACGTATTGCTCAGGAAGACTGCCGTAACGGTTTCCTGCTTGACGGCTTCCCGCGTACTATTCCGCAGGCTGACGCGATGAAAGAAGCGGGCATCAATGTTGATTACGTTCTGGAGTTCGACGTACCGGACGAACTGATTGTTGATCGTATTGTTGGTCGCCGCGTTCACGCGCCATCTGGCCGTGTTTATCACGTTAAATTCAATCCGCCGAAAGTAGAAGG…	CGAGAGCCATTCGCCAGGCGGCGGATGAAGTGCTGGCAGGACAACATGATGATGAGTTCCCGCTGGCAATCTGGCAAACGGGATCCGGTACGCAAAGCAATATGAATATGAATGAAGTACTGGCTAACCGGGCCAGCGAATTGCTTGGCGGCGTACGCGGAATGGAACGTAAAGTTCACCCTAACGATGACGTGAACAAAAGCCAAAGCTCCAATGATGTCTTCCCAACTGCTATGCACGTAGCGGCGTTATTGGCACTGCGTAAGCAACTCATTCCTCAGCTCAAAAACCTCACTCAAACTCTGAATGAGAAATCGCGCGCATTTGCCGATATCGTCAAAATTGGTCGTACCCACTTGCAGGACGCCACACCGCTGACCCTGGGACAGGAGATTTCTG…	GGTCTGCACGGCGTTGGTGTTTCGGTAGTAAACGCCCTGTCGCAAAAACTGGAGCTGGTTATTCAGCGCGAGGGTAAAATTCACCGTCAGATCTACGAACACGGTGTTCCGCAGGCACCGCTGGCGGTTACTGGTGACACCGACAAAACCGGCACCATGGTGCGTTTCTGGCCAAGCCTTGAAACTTTCACCAATGTGACCGAGTTCGAATACGATATTCTGGCGAAGCGTCTGCGTGAGCTGTCCTTCCTCAATTCCGGCGTGTCTATTCGTCTGAAAGACAAACGCGACGGCAAAGAAGACCACTTCCACTATGAAGGCGGCATTAAGGCGTTCGTTGAATATCTGAACAAGAACAAAACGCCGATTCACCCGAACATCTTCTACTTCTCCACCGAA…	CGATGCTGCCGTCGAGAAAGCCTATAAAGGTGAGCGTAAAATCTCCTGGATGGAAATTTACACCGGTGAAAAATCCACACAGGTTTATGGTCAGGACGTCTGGCTGCCTGCTGAAACCCTTGATCTGATTCGTGAATATCGCGTTGCTATCAAAGGCCCGCTGACCACTCCGGTTGGCGGCGGTATTCGTTCTCTTAACGTTGCCCTGCGCCAGGAGCTGGATCTTTACATCTGCCTGCGTCCGGTACGTTACTACCAGGGCACCCCAAGCCCGGTTAAACACCCTGAACTGACCGATATGGTTATCTTCCGTGAAAACTCGGAAGACATTTATGCGGGTATCGAATGGAAAGCTGACTCTGCCGACGCTGAGAAAGTGATCAAATTCCTGCGTGAAGA…	GGTGTAGCGCGTAAACCGGGTATGGATCGTTCCGACCTGTTTAACGTTAACGCCGGTATTGTGAAGAATCTGGTTCAGCAAGTTGCGAAAACTTGCCCGAAAGCGTGCATTGGCATTATCACTAACCCGGTTAACACCACTGTGGCTATCGCTGCGGAAGTGCTGAAAAAAGCCGGTGTTTATGACAAAAACAAGCTGTTTGGCGTTACTACGCTGGATATTATTCGTTCCAACACCTTTGTCGCGGAACTGAAAGGTAAACAACCGGGTGATGTAGAAGTGCCTGTTATTGGCGGTCACTCTGGCGTTACTATTCTGCCGCTGCTGTCACAGGTTCCTGGCGTCAGTTTTACCGAGCAGGAAGTCGCAGATCTGACCAAACGTATCCAGAACGCGGGC…	ATAACGCGCGTGAGAAAGCGCGCGGCGCGAAAGCGATCGGCACCACGGGGCGTGGTATCGGGCCTGCTTATGAAGATAAAGTGGCACGTCGCGGTCTGCGTGTTGGCGACCTTTTCGACAAAGAAACCTTCGCTGAAAAACTGAAAGAAGTGATGGAATATCACAACTTCCAGTTGGTTAACTACTACAAAGTTGAAGCGGTTGATTACCAGAAAGTTCTGGATGATGTGATGGCCGTTGCCGACATCCTGACTTCCATGGTGGTTGACGTTTCTGACCTGCTTGACCAGGCGCGTCAGCGTGGCGATTTCGTCATGTTTGAAGGTGCGCAGGGTACGCTTCTGGATATCGACCACGGTACTTATCCGTACGTAACCTCTTCCAACACCACTGCGGGCG…	TGCTCGTAAACTGGGCGTCGATATCGACAACCTGCTGTGTTCCCAGCCGGACACTGGCGAACAGGCGCTGGAAATCTGTGACGCCCTGGCGCGCTCTGGCGCAGTAGATGTTATCGTTGTTGACTCCGTAGCGGCACTGACGCCGAAAGCGGAAATCGAAGGTGAAATCGGCGACTCTCACATGGGCCTTGCGGCACGTATGATGAGCCAGGCTATGCGTAAGCTGGCGGGTAACCTGAAGCAGTCCAACACGCTGCTGATCTTCATCAACCAGATCCGTATGAAAATTGGTGTGATGTTCGGTAACCCGGAAACCACTACCGGTGGTAACGCGCTGAAATTCTACGCCTCTGTTCGTCTCGACATCCGTCGTATCGGCGCGGTGAAAGAGGGCGAAAA…
LMG20973	GGGGAAAGGGACTCAGGCTCAGTTCATCATGGAGAAATATGGTATTCCGCAAATCTCCACAGGTGATATGCTGCGTGCCGCAGTCAAATCTGGCTCCGAGCTGGGTAAACAAGCAAAAGACATTATGGACGCTGGCAAACTGGTTACCGATGAACTGGTGATCGCGCTGGTTAAAGAACGTATTGCTCAGGAAGACTGCCGTAACGGTTTCCTGCTTGACGGCTTCCCGCGTACTATTCCGCAGGCTGACGCGATGAAAGAAGCGGGCATCAATGTTGATTACGTTCTGGAGTTCGACGTACCGGACGAACTGATTGTTGATCGTATTGTTGGTCGCCGCGTTCACGCGCCATCTGGCCGTGTTTATCACGTTAAATTCAATCCGCCGAAAGTAGAAGG…	CGAGAGCCATTCGCCAGGCGGCGGATGAAGTGCTGGCAGGACAACATGATGATGAGTTCCCGCTGGCAATCTGGCAAACGGGATCCGGTACGCAAAGCAATATGAATATGAATGAAGTACTGGCTAACCGGGCCAGCGAATTGCTTGGCGGCGTACGCGGAATGGAACGTAAAGTTCACCCTAACGATGACGTGAACAAAAGCCAAAGCTCCAATGATGTCTTCCCAACTGCTATGCACGTAGCGGCGTTATTGGCACTGCGTAAGCAACTCATTCCTCAGCTCAAAAACCTCACTCAAACTCTGAATGAGAAATCGCGCGCATTTGCCGATATCGTCAAAATTGGTCGTACCCACTTGCAGGACGCCACACCGCTGACCCTGGGACAGGAGATTTCTG…	GGTCTGCACGGCGTTGGTGTTTCGGTAGTAAACGCCCTGTCGCAAAAACTGGAGCTGGTTATTCAGCGCGAGGGTAAAATTCACCGTCAGATCTACGAACACGGTGTTCCGCAGGCACCGCTGGCGGTTACTGGTGACACCGACAAAACCGGCACCATGGTGCGTTTCTGGCCAAGCCTTGAAACTTTCACCAATGTGACCGAGTTCGAATACGATATTCTGGCGAAGCGTCTGCGTGAGCTGTCCTTCCTCAATTCCGGCGTGTCTATTCGTCTGAAAGACAAACGCGACGGCAAAGAAGACCACTTCCACTATGAAGGCGGCATTAAGGCGTTCGTTGAATATCTGAACAAGAACAAAACGCCGATTCACCCGAACATCTTCTACTTCTCCACCGAA…	CGATGCTGCCGTCGAGAAAGCCTATAAAGGTGAGCGTAAAATCTCCTGGATGGAAATTTACACCGGTGAAAAATCCACACAGGTTTATGGTCAGGACGTCTGGCTGCCTGCTGAAACCCTTGATCTGATTCGTGAATATCGCGTTGCTATCAAAGGCCCGCTGACCACTCCGGTTGGCGGCGGTATTCGTTCTCTTAACGTTGCCCTGCGCCAGGAGCTGGATCTTTACATCTGCCTGCGTCCGGTACGTTACTACCAGGGCACCCCAAGCCCGGTTAAACACCCTGAACTGACCGATATGGTTATCTTCCGTGAAAACTCGGAAGACATTTATGCGGGTATCGAATGGAAAGCTGACTCTGCCGACGCTGAGAAAGTGATCAAATTCCTGCGTGAAGA…	GGTGTAGCGCGTAAACCGGGTATGGATCGTTCCGACCTGTTTAACGTTAACGCCGGTATTGTGAAGAATCTGGTTCAGCAAGTTGCGAAAACTTGCCCGAAAGCGTGCATTGGCATTATCACTAACCCGGTTAACACCACTGTGGCTATCGCTGCGGAAGTGCTGAAAAAAGCCGGTGTTTATGACAAAAACAAGCTGTTTGGCGTTACTACGCTGGATATTATTCGTTCCAACACCTTTGTCGCGGAACTGAAAGGTAAACAACCGGGTGATGTAGAAGTGCCTGTTATTGGCGGTCACTCTGGCGTTACTATTCTGCCGCTGCTGTCACAGGTTCCTGGCGTCAGTTTTACCGAGCAGGAAGTCGCAGATCTGACCAAACGTATCCAGAACGCGGGC…	ATAACGCGCGTGAGAAAGCGCGCGGCGCGAAAGCGATCGGCACCACGGGGCGTGGTATCGGGCCTGCTTATGAAGATAAAGTGGCACGTCGCGGTCTGCGTGTTGGCGACCTTTTCGACAAAGAAACCTTCGCTGAAAAACTGAAAGAAGTGATGGAATATCACAACTTCCAGTTGGTTAACTACTACAAAGTTGAAGCGGTTGATTACCAGAAAGTTCTGGATGATGTGATGGCCGTTGCCGACATCCTGACTTCCATGGTGGTTGACGTTTCTGACCTGCTTGACCAGGCGCGTCAGCGTGGCGATTTCGTCATGTTTGAAGGTGCGCAGGGTACGCTTCTGGATATCGACCACGGTACTTATCCGTACGTAACCTCTTCCAACACCACTGCGGGCG…	TGCTCGTAAACTGGGCGTCGATATCGACAACCTGCTGTGTTCCCAGCCGGACACTGGCGAACAGGCGCTGGAAATCTGTGACGCCCTGGCGCGCTCTGGCGCAGTAGATGTTATCGTTGTTGACTCCGTAGCGGCACTGACGCCGAAAGCGGAAATCGAAGGTGAAATCGGCGACTCTCACATGGGCCTTGCGGCACGTATGATGAGCCAGGCTATGCGTAAGCTGGCGGGTAACCTGAAGCAGTCCAACACGCTGCTGATCTTCATCAACCAGATCCGTATGAAAATTGGTGTGATGTTCGGTAACCCGGAAACCACTACCGGTGGTAACGCGCTGAAATTCTACGCCTCTGTTCGTCTCGACATCCGTCGTATCGGCGCGGTGAAAGAGGGCGAAAA…
LMG20976T	GGGGAAAGGGACTCAGGCTCAGTTCATCATGGAGAAATATGGTATTCCGCAAATCTCCACAGGTGATATGCTGCGTGCCGCAGTCAAATCTGGCTCCGAGCTGGGTAAACAAGCAAAAGACATTATGGACGCTGGCAAACTGGTTACCGATGAACTGGTGATCGCGCTGGTTAAAGAACGTATTGCTCAGGAAGACTGCCGTAACGGTTTCCTGCTTGACGGCTTCCCGCGTACTATTCCGCAGGCTGACGCGATGAAAGAAGCGGGCATCAATGTTGATTACGTTCTGGAGTTCGACGTACCGGACGAACTGATTGTTGATCGTATTGTTGGTCGCCGCGTTCACGCGCCATCTGGCCGTGTTTATCACGTTAAATTCAATCCGCCGAAAGTAGAAGG…	CGAGAGCCATTCGCCAGGCGGCGGATGAAGTGCTGGCAGGACAACATGATGATGAGTTCCCGCTGGCAATCTGGCAAACGGGATCCGGTACGCAAAGCAATATGAATATGAATGAAGTACTGGCTAACCGGGCCAGCGAATTGCTTGGCGGCGTACGCGGAATGGAACGTAAAGTTCACCCTAACGATGACGTGAACAAAAGCCAAAGCTCCAATGATGTCTTCCCAACTGCTATGCACGTAGCGGCGTTATTGGCACTGCGTAAGCAACTCATTCCTCAGCTCAAAAACCTCACTCAAACTCTGAATGAGAAATCGCGCGCATTTGCCGATATCGTCAAAATTGGTCGTACCCACTTGCAGGACGCCACACCGCTGACCCTGGGACAGGAGATTTCTG…	GGTCTGCACGGCGTTGGTGTTTCGGTAGTAAACGCCCTGTCGCAAAAACTGGAGCTGGTTATTCAGCGCGAGGGTAAAATTCACCGTCAGATCTACGAACACGGTGTTCCGCAGGCACCGCTGGCGGTTACTGGTGACACCGACAAAACCGGCACCATGGTGCGTTTCTGGCCAAGCCTTGAAACTTTCACCAATGTGACCGAGTTCGAATACGATATTCTGGCGAAGCGTCTGCGTGAGCTGTCCTTCCTCAATTCCGGCGTGTCTATTCGTCTGAAAGACAAACGCGACGGCAAAGAAGACCACTTCCACTATGAAGGCGGCATTAAGGCGTTCGTTGAATATCTGAACAAGAACAAAACGCCGATTCACCCGAACATCTTCTACTTCTCCACCGAA…	CGATGCTGCCGTCGAGAAAGCCTATAAAGGTGAGCGTAAAATCTCCTGGATGGAAATTTACACCGGTGAAAAATCCACACAGGTTTATGGTCAGGACGTCTGGCTGCCTGCTGAAACCCTTGATCTGATTCGTGAATATCGCGTTGCTATCAAAGGCCCGCTGACCACTCCGGTTGGCGGCGGTATTCGTTCTCTTAACGTTGCCCTGCGCCAGGAGCTGGATCTTTACATCTGCCTGCGTCCGGTACGTTACTACCAGGGCACCCCAAGCCCGGTTAAACACCCTGAACTGACCGATATGGTTATCTTCCGTGAAAACTCGGAAGACATTTATGCGGGTATCGAATGGAAAGCTGACTCTGCCGACGCTGAGAAAGTGATCAAATTCCTGCGTGAAGA…	GGTGTAGCGCGTAAACCGGGTATGGATCGTTCCGACCTGTTTAACGTTAACGCCGGTATTGTGAAGAATCTGGTTCAGCAAGTTGCGAAAACTTGCCCGAAAGCGTGCATTGGCATTATCACTAACCCGGTTAACACCACTGTGGCTATCGCTGCGGAAGTGCTGAAAAAAGCCGGTGTTTATGACAAAAACAAGCTGTTTGGCGTTACTACGCTGGATATTATTCGTTCCAACACCTTTGTCGCGGAACTGAAAGGTAAACAACCGGGTGATGTAGAAGTGCCTGTTATTGGCGGTCACTCTGGCGTTACTATTCTGCCGCTGCTGTCACAGGTTCCTGGCGTCAGTTTTACCGAGCAGGAAGTCGCAGATCTGACCAAACGTATCCAGAACGCGGGC…	ATAACGCGCGTGAGAAAGCGCGCGGCGCGAAAGCGATCGGCACCACGGGGCGTGGTATCGGGCCTGCTTATGAAGATAAAGTGGCACGTCGCGGTCTGCGTGTTGGCGACCTTTTCGACAAAGAAACCTTCGCTGAAAAACTGAAAGAAGTGATGGAATATCACAACTTCCAGTTGGTTAACTACTACAAAGTTGAAGCGGTTGATTACCAGAAAGTTCTGGATGATGTGATGGCCGTTGCCGACATCCTGACTTCCATGGTGGTTGACGTTTCTGACCTGCTTGACCAGGCGCGTCAGCGTGGCGATTTCGTCATGTTTGAAGGTGCGCAGGGTACGCTTCTGGATATCGACCACGGTACTTATCCGTACGTAACCTCTTCCAACACCACTGCGGGCG…	TGCTCGTAAACTGGGCGTCGATATCGACAACCTGCTGTGTTCCCAGCCGGACACTGGCGAACAGGCGCTGGAAATCTGTGACGCCCTGGCGCGCTCTGGCGCAGTAGATGTTATCGTTGTTGACTCCGTAGCGGCACTGACGCCGAAAGCGGAAATCGAAGGTGAAATCGGCGACTCTCACATGGGCCTTGCGGCACGTATGATGAGCCAGGCTATGCGTAAGCTGGCGGGTAACCTGAAGCAGTCCAACACGCTGCTGATCTTCATCAACCAGATCCGTATGAAAATTGGTGTGATGTTCGGTAACCCGGAAACCACTACCGGTGGTAACGCGCTGAAATTCTACGCCTCTGTTCGTCTCGACATCCGTCGTATCGGCGCGGTGAAAGAGGGCGAAAA…
